# Supplementary material for: Loss of full-length dystrophin expression results in major cell-autonomous abnormalities in proliferating myoblasts
Source: bioRxiv preprint, doi:10.1101/2021.08.24.457331, version 3 (2022-08-17)
Supplement: Supplementary Table S11 [file 457331_file15.xls]

## Sheet: reactions
Reaction ID	Reaction name	Formula	Pathway	Max flux	Max flux reference	corrected FC
10FTHFtm	10-Formyltetrahydrofolate Mitochondrial Transport via Diffusion	m00266c -> m00266m	Transport reactions	1000	1000	1
10FTHFtm_REV	10-Formyltetrahydrofolate Mitochondrial Transport via Diffusion (reversible)	m00266m -> m00266c	Transport reactions	1000	1000	1
11DOCRTSLteNo1	Transport of 11-Deoxycortisol, Extracellular (No1)	m00295c + m01371c + m02040c + 9.4162e-05 prot_P08183 -> m01285c + m02039c + m02751c + m00295s	Transport reactions	92.5865	1000	0.093493
11DOCRTSTRNteNo1	Transport of 11-Deoxycorticosterone, Extracellular (No1)	m00294c + m01371c + m02040c + 9.4162e-05 prot_P08183 -> m01285c + m02039c + m02751c + m00294s	Transport reactions	92.5865	1000	0.093493
12DHCHOLabc	12-Dehydrocholic acid ABC bile acid transporter	m01371c + m02040c + 12dhchol_c -> m01285c + m02039c + m02751c + 12dhchol_s	Transport reactions	3755.26	1000	3.7525
12DHCHOLt	12-Dehydrocholic acid transport via bicarbonate countertransport	m02046c + 12dhchol_s -> m02046s + 12dhchol_c	Transport reactions	2755.26	1000	2.7535
12DHCHOLt2	12-Dehydrocholic acid transport via sodium cotransport	2 m02519s + 12dhchol_s -> 2 m02519c + 12dhchol_c	Transport reactions	1000	1000	1
12DHCHOLt_REV	12-Dehydrocholic acid transport via bicarbonate countertransport (reversible)	m02046s + 12dhchol_c -> m02046c + 12dhchol_s	Transport reactions	2755.26	1000	2.7535
12HARACHDte	Transport of 12 Hydroxy Arachidonic Acid, Extracellular Space, Active Transport	m01371c + m02040c + m00324c -> m01285c + m02039c + m02751c + m00324s	Transport reactions	1000	1000	1
12HARACHDtr	Transport of 12 Hydroxy Arachidonic Acid, Endoplasmatic Reticulum, Active Transport	m00324r + m01371r + m02040r -> m01285r + m02039r + m02751r + m00324c	Transport reactions	1000	1000	1
12HPETATP	Transport of 12-Hydroperoxyeicosa-5, 8, 10, 14-Tetraenoate, by FATP	m00309c + m01371c + m02040c -> m00309s + m01285c + m02039c + m02751c	Transport reactions	1000	1000	1
12HPETUPKt	Transport of 12-Hydroperoxyeicosa-5, 8, 10, 14-Tetraenoate, by Diffusion	m00309s -> m00309c	Transport reactions	1000	1000	1
12HTACRhrNo1	oxidation of tacrolimus in hepatocytes (No1)	0.00010808 prot_P20815 + pmet_12HTACRhr -> m02040r + m02554r + 12htacr_r	Drug metabolism	1000	1000	1
12HTACRhrNo2	oxidation of tacrolimus in hepatocytes (No2)	0.0022222 prot_P08684 + pmet_12HTACRhr -> m02040r + m02554r + 12htacr_r	Drug metabolism	1000	1000	1
12HTACRitr	12HTACRitr	12htacr_r -> 12htacr_c	Drug metabolism	1000	1000	1
12HTACRitr_REV	12HTACRitr (reversible)	12htacr_c -> 12htacr_r	Drug metabolism	1000	1000	1
12HTACRtep	exit of 12-hydroxy tacrolimus into portal blood	12htacr_c -> 12htacr_s	Drug metabolism	1000	1000	1
12HTACRtep_REV	exit of 12-hydroxy tacrolimus into portal blood (reversible)	12htacr_s -> 12htacr_c	Drug metabolism	1000	1000	1
12HTACRtu	efflux of 12-hydroxy tacrolimus into intestinal lumen by ABC transporter	m01371c + m02040c + 12htacr_c -> m01285c + m02039c + m02751c + 12htacr_s	Drug metabolism	1000	1000	1
12PPDRte	Assumed Passive Diffusion into Extracellular Space	m02771c -> m02771s	Transport reactions	1000	1000	1
12PPDRte_REV	Assumed Passive Diffusion into Extracellular Space (reversible)	m02771s -> m02771c	Transport reactions	1000	1000	1
1331TAALThr	demethylation of 13-O-desmethyl-tacrolimus to 13,31-O-Didesmethyl-tacrolimus in hepatocytes	m02039r + m02871r + 13dmt_r -> m02877r + 1331tacr_r	Drug metabolism	1000	1000	1
1331TACRhr	demethylation of 31-O-desmethyl-tacrolimus to 13,31-O-Didesmethyl-tacrolimus in hepatocytes	m02039r + m02871r + 31dmt_r -> m02877r + 1331tacr_r	Drug metabolism	1000	1000	1
1331TACRteb	efflux of 13,31-O-Didesmethyl-tacrolimus into bile	m01371c + m02040c + 1331tacr_c -> m01285c + m02039c + m02751c + 1331tacr_s	Drug metabolism	1000	1000	1
1331TACRtev	exit of 13,31-O-Didesmethyl-tacrolimus into hepatic vein	1331tacr_c -> 1331tacr_s	Drug metabolism	1000	1000	1
13DAMPPOXNo1	1, 3-Diaminopropane:Oxygen Oxidoreductase (Deaminating) (No1)	6.9444e-05 prot_P19801 + pmet_13DAMPPOX -> m00760c + m02041c + m02579c	Beta-alanine metabolism	1000	1000	1
13DAMPPOXNo2	1, 3-Diaminopropane:Oxygen Oxidoreductase (Deaminating) (No2)	3.7538e-05 prot_Q16853 + pmet_13DAMPPOX -> m00760c + m02041c + m02579c	Beta-alanine metabolism	2387.9	1000	2.38651
13DAMPPOXNo3	1, 3-Diaminopropane:Oxygen Oxidoreductase (Deaminating) (No3)	3.7538e-05 prot_O75106 + pmet_13DAMPPOX -> m00760c + m02041c + m02579c	Beta-alanine metabolism	1032.56	1000	1.03252
13DAMPPte	Facilitated Diffusion Through Uniport Octs Transporters into Extracellular Space	m00248c -> m00248s	Transport reactions	5442.13	1000	5.43769
13DAMPPte_REV	Facilitated Diffusion Through Uniport Octs Transporters into Extracellular Space (reversible)	m00248s -> m00248c	Transport reactions	5442.13	1000	5.43769
13DMThr	demthylation of tacrolimus to 13-O-desmethyl tacrolimus in hepatocytes	m02039r + m02871r + tacr_r -> m02877r + 13dmt_r	Drug metabolism	1000	1000	1
13DMTitr	13DMTitr	13dmt_r -> 13dmt_c	Drug metabolism	1000	1000	1
13DMTitr_REV	13DMTitr (reversible)	13dmt_c -> 13dmt_r	Drug metabolism	1000	1000	1
13DMTtep	exit of 13-O-desmethyl tacrolimus into portal blood	13dmt_c -> 13dmt_s	Drug metabolism	1000	1000	1
13DMTtep_REV	exit of 13-O-desmethyl tacrolimus into portal blood (reversible)	13dmt_s -> 13dmt_c	Drug metabolism	1000	1000	1
13DMTtu	efflux of 13-O-desmethyl tacrolimus into intestinal lumen by ABC transporter	m01371c + m02040c + 13dmt_c -> m01285c + m02039c + m02751c + 13dmt_s	Drug metabolism	1000	1000	1
13HTACRitr	13HTACRitr	1331tacr_r -> 1331tacr_c	Drug metabolism	1000	1000	1
13HTACRitr_REV	13HTACRitr (reversible)	1331tacr_c -> 1331tacr_r	Drug metabolism	1000	1000	1
13_CIS_RETNte	Transport of 13-Cis-Retinoate	m00350c -> m00350s	Transport reactions	1000	1000	1
13_CIS_RETNte_REV	Transport of 13-Cis-Retinoate (reversible)	m00350s -> m00350c	Transport reactions	1000	1000	1
14HMDZALThrNo1	oxidation of 4-OH-midazolam to 1,4-Dihydroxy-midazolam in hepatocytes (No1)	0.00010808 prot_P20815 + pmet_14HMDZALThr -> m02040r + m02554r + 14hmdz_r	Drug metabolism	1000	1000	1
14HMDZALThrNo2	oxidation of 4-OH-midazolam to 1,4-Dihydroxy-midazolam in hepatocytes (No2)	0.0022222 prot_P08684 + pmet_14HMDZALThr -> m02040r + m02554r + 14hmdz_r	Drug metabolism	1000	1000	1
14HMDZhrNo1	oxidation of 1-OH-midazolam to 1,4-Dihydroxy-midazolam in hepatocytes (No1)	0.00010808 prot_P20815 + pmet_14HMDZhr -> m02040r + m02554r + 14hmdz_r	Drug metabolism	1000	1000	1
14HMDZhrNo2	oxidation of 1-OH-midazolam to 1,4-Dihydroxy-midazolam in hepatocytes (No2)	0.0022222 prot_P08684 + pmet_14HMDZhr -> m02040r + m02554r + 14hmdz_r	Drug metabolism	1000	1000	1
14HMDZitr	14HMDZitr	14hmdz_r -> 14hmdz_c	Drug metabolism	1000	1000	1
14HMDZitr_REV	14HMDZitr (reversible)	14hmdz_c -> 14hmdz_r	Drug metabolism	1000	1000	1
14MDZtev	efflux of 1,4-Dihydroxy-midazolam into hepatic vein	14hmdz_c -> 14hmdz_s	Drug metabolism	1000	1000	1
14MDZtev_REV	efflux of 1,4-Dihydroxy-midazolam into hepatic vein (reversible)	14hmdz_s -> 14hmdz_c	Drug metabolism	1000	1000	1
1513DTACRhr	demthylation of 13-O-desmethyl tacrolimus to 13,15-O-didesmethyl tacrolimus in hepatocytes	m02039r + m02871r + 13dmt_r -> m02877r + 1513tacr_r	Drug metabolism	1000	1000	1
1513DTALThr	demthylation of 15-O-desmethyl tacrolimus to 13,15-O-didesmethyl tacrolimus in hepatocytes	m02039r + m02871r + 15dmt_r -> m02877r + 1513tacr_r	Drug metabolism	1000	1000	1
1513TACRitr	1513TACRitr	1513tacr_r -> 1513tacr_c	Drug metabolism	1000	1000	1
1513TACRitr_REV	1513TACRitr (reversible)	1513tacr_c -> 1513tacr_r	Drug metabolism	1000	1000	1
1513TACRtep	exit of 13,15-O-didesmethyl tacrolimus into portal blood	1513tacr_c -> 1513tacr_s	Drug metabolism	1000	1000	1
1513TACRtep_REV	exit of 13,15-O-didesmethyl tacrolimus into portal blood (reversible)	1513tacr_s -> 1513tacr_c	Drug metabolism	1000	1000	1
1513TACRtu	efflux of 13,15-O-didesmethyl tacrolimus into intestinal lumen by ABC transporter	m01371c + m02040c + 1513tacr_c -> m01285c + m02039c + m02751c + 1513tacr_s	Drug metabolism	1000	1000	1
1531TACRhr	demethylation of 15-O-desmethyl tacrolimus to 15, 31-O-Didesmethyl-tacrolimus in hepatocytes	m02039r + m02871r + 15dmt_r -> m02877r + 1531tacr_r	Drug metabolism	1000	1000	1
1531TACRitr	1531TACRitr	1531tacr_r -> 1531tacr_c	Drug metabolism	1000	1000	1
1531TACRitr_REV	1531TACRitr (reversible)	1531tacr_c -> 1531tacr_r	Drug metabolism	1000	1000	1
1531TACRteb	efflux of 15, 31-O-Didesmethyl-tacrolimus into bile	m01371c + m02040c + 1531tacr_c -> m01285c + m02039c + m02751c + 1531tacr_s	Drug metabolism	1000	1000	1
1531TACRtev	exit of 15, 31-O-Didesmethyl-tacrolimus into hepatic vein	1531tacr_c -> 1531tacr_s	Drug metabolism	1000	1000	1
1531TALThr	demethylation of 31-O-desmethyl tacrolimus to 15, 31-O-Didesmethyl-tacrolimus in hepatocytes	m02039r + m02871r + 31dmt_r -> m02877r + 1531tacr_r	Drug metabolism	1000	1000	1
15DMThr	demethylation of tacrolimus to 15-O-desmethyl tacrolimus in hepatocytes	m02039r + m02871r + tacr_r -> m02877r + 15dmt_r	Drug metabolism	1000	1000	1
15DMTitr	15DMTitr	15dmt_r -> 15dmt_c	Drug metabolism	1000	1000	1
15DMTitr_REV	15DMTitr (reversible)	15dmt_c -> 15dmt_r	Drug metabolism	1000	1000	1
15DMTtep	exit of 15-O-desmethyl tacrolimus into portal blood	15dmt_c -> 15dmt_s	Drug metabolism	1000	1000	1
15DMTtep_REV	exit of 15-O-desmethyl tacrolimus into portal blood (reversible)	15dmt_s -> 15dmt_c	Drug metabolism	1000	1000	1
15DMTtu	efflux of 15-O-desmethyl tacrolimus into intestinal lumen by ABC transporter	m01371c + m02040c + 15dmt_c -> m01285c + m02039c + m02751c + 15dmt_s	Drug metabolism	1000	1000	1
15HPETATP	Transport of 15(S)-HPETE, Active Transport	m00380c + m01371c + m02040c -> m01285c + m02039c + m02751c + m00380s	Transport reactions	1000	1000	1
15HPETUPKt	Transport of 15(S)-HPETE, Diffusion	m00380s -> m00380c	Transport reactions	1000	1000	1
15KPROSTGF2cNo1	Formation of 15-Keto-Prostaglandin F2A (No1)	m02552c + m02789c + 5.9102e-06 prot_P15428 -> m02039c + m02553c + 15kprostgf2_c	Eicosanoid metabolism	158.96	1000	0.159801
15KPROSTGF2c_REVNo1	Formation of 15-Keto-Prostaglandin F2A (reversible) (No1)	m02039c + m02553c + 15kprostgf2_c + 5.5556e-06 prot_P15428 -> m02552c + m02789c	Eicosanoid metabolism	158.96	1000	0.159801
15KPROSTGF2t	Transport of 15-Keto-Prostaglandin F2A, Lactate Antiport	m02403s + 15kprostgf2_c -> m02403c + 15kprostgf2_s	Transport reactions	1000	1000	1
15KPROSTGF2t_REV	Transport of 15-Keto-Prostaglandin F2A, Lactate Antiport (reversible)	m02403c + 15kprostgf2_s -> m02403s + 15kprostgf2_c	Transport reactions	1000	1000	1
17AHPRGNLONEteNo1	Transport of 17Alpha-Hydroxypregnenolone, Extracellular (No1)	m00408c + m01371c + m02040c + 9.4162e-05 prot_P08183 -> m01285c + m02039c + m02751c + m00408s	Transport reactions	92.5865	1000	0.093493
17AHPRGSTRNteNo1	Transport of 17Alpha-Hydroxyprogesterone, Extracellular (No1)	m00409c + m01371c + m02040c + 9.4162e-05 prot_P08183 -> m01285c + m02039c + m02751c + m00409s	Transport reactions	92.5865	1000	0.093493
18HARACHDte	Transport of 18 Hydroxy Arachidonic Acid, Extracellular Space, Active Transport	m01371c + m02040c + m00428c -> m01285c + m02039c + m02751c + m00428s	Transport reactions	1000	1000	1
18HARACHDtr	Transport of 18 Hydroxy Arachidonic Acid, Endoplasmatic Reticulum, Active Transport	m00428r + m01371r + m02040r -> m01285r + m02039r + m02751r + m00428c	Transport reactions	1000	1000	1
1A25DHVITD3t2e	Assumed Passive Diffusion into Extracellular Space	m01417c -> m01417s	Transport reactions	1000	1000	1
1A25DHVITD3te	Transport As Vitamin D	m01417s -> m01417c	Transport reactions	1000	1000	1
1A25HVITD2t	1A25HVITD2t	m00519c -> m00519s	Transport reactions	1000	1000	1
1A25HVITD2t_REV	1A25HVITD2t (reversible)	m00519s -> m00519c	Transport reactions	1000	1000	1
1A25HVITD2tm	1A25HVITD2tm	m00519m -> m00519c	Transport reactions	1000	1000	1
1A25HVITD2tm_REV	1A25HVITD2tm (reversible)	m00519c -> m00519m	Transport reactions	1000	1000	1
1HIBUPGLUC_Sthv	release of 1-hydroxy S-ibuprofen-glucuronide into hepatic vein	1hibupglu_S_c -> 1hibupglu_S_s	Drug metabolism	1000	1000	1
1HIBUPGLUC_Sthv_REV	release of 1-hydroxy S-ibuprofen-glucuronide into hepatic vein (reversible)	1hibupglu_S_s -> 1hibupglu_S_c	Drug metabolism	1000	1000	1
1HIBUPGLUitr	1HIBUPGLUitr	1hibupglu_S_r -> 1hibupglu_S_c	Drug metabolism	1000	1000	1
1HIBUPGLUitr_REV	1HIBUPGLUitr (reversible)	1hibupglu_S_c -> 1hibupglu_S_r	Drug metabolism	1000	1000	1
1HIBUP_SGLUhepNo1	glucuronidation of 1-hydroxy ibuprofen (No1)	5.0875e-08 prot_P16662 + pmet_1HIBUP_SGLUhep -> m03106r + 1hibupglu_S_r	Drug metabolism	1000	1000	1
1HIBUP_SGLUhepNo2	glucuronidation of 1-hydroxy ibuprofen (No2)	5.0875e-08 prot_O60656 + pmet_1HIBUP_SGLUhep -> m03106r + 1hibupglu_S_r	Drug metabolism	1000	1000	1
1HIBUP_SGLUhepNo3	glucuronidation of 1-hydroxy ibuprofen (No3)	5.0875e-08 prot_P35503 + pmet_1HIBUP_SGLUhep -> m03106r + 1hibupglu_S_r	Drug metabolism	1000	1000	1
1HIBUP_Sitr	1HIBUP_Sitr	1hibup_S_r -> 1hibup_S_c	Drug metabolism	1000	1000	1
1HIBUP_Sitr_REV	1HIBUP_Sitr (reversible)	1hibup_S_c -> 1hibup_S_r	Drug metabolism	1000	1000	1
1HIBUP_Sthv	release of 1-hydroxy-ibuprofen into hepatic vein	1hibup_S_c -> 1hibup_S_s	Drug metabolism	1000	1000	1
1HIBUP_Sthv_REV	release of 1-hydroxy-ibuprofen into hepatic vein (reversible)	1hibup_S_s -> 1hibup_S_c	Drug metabolism	1000	1000	1
1HMDGLUChrNo1	glucuronidation of 1-OH-midazolam in enterocytes (No1)	5.0875e-08 prot_P06133 + pmet_1HMDGLUChr -> m02039r + m03106r + 1hmdgluc_r	Drug metabolism	1000	1000	1
1HMDGLUChrNo2	glucuronidation of 1-OH-midazolam in enterocytes (No2)	5.0875e-08 prot_P16662 + pmet_1HMDGLUChr -> m02039r + m03106r + 1hmdgluc_r	Drug metabolism	1000	1000	1
1HMDGLUChrNo3	glucuronidation of 1-OH-midazolam in enterocytes (No3)	5.0875e-08 prot_P22310 + pmet_1HMDGLUChr -> m02039r + m03106r + 1hmdgluc_r	Drug metabolism	1000	1000	1
1HMDGLUCitr	1HMDGLUCitr	1hmdgluc_r -> 1hmdgluc_c	Drug metabolism	1000	1000	1
1HMDGLUCitr_REV	1HMDGLUCitr (reversible)	1hmdgluc_c -> 1hmdgluc_r	Drug metabolism	1000	1000	1
1HMDZGLUChc	uptake of 1-OH-midazolam-glucuronide into hepatocytes	1hmdgluc_s -> 1hmdgluc_c	Drug metabolism	1000	1000	1
1HMDZGLUChc_REV	uptake of 1-OH-midazolam-glucuronide into hepatocytes (reversible)	1hmdgluc_c -> 1hmdgluc_s	Drug metabolism	1000	1000	1
1OHMDZhrNo1	oxidation of midazolam to 1-OH-midazolam in hepatocytes (No1)	0.00010808 prot_P20815 + pmet_1OHMDZhr -> m02040r + m02554r + 1ohmdz_r	Drug metabolism	1000	1000	1
1OHMDZhrNo2	oxidation of midazolam to 1-OH-midazolam in hepatocytes (No2)	0.0022222 prot_P08684 + pmet_1OHMDZhr -> m02040r + m02554r + 1ohmdz_r	Drug metabolism	1000	1000	1
1OHMDZitr	1OHMDZitr	1ohmdz_r -> 1ohmdz_c	Drug metabolism	1000	1000	1
1OHMDZitr_REV	1OHMDZitr (reversible)	1ohmdz_c -> 1ohmdz_r	Drug metabolism	1000	1000	1
1OHMDZtep	efflux of 1-OH-midazolam into portal blood	1ohmdz_c -> 1ohmdz_s	Drug metabolism	1000	1000	1
1OHMDZtep_REV	efflux of 1-OH-midazolam into portal blood (reversible)	1ohmdz_s -> 1ohmdz_c	Drug metabolism	1000	1000	1
1a25DHVITD3TRn	Tanslocation of 1-Alpha, 25-Dihydroxyvitamin D3 to Nucleus	m01417c -> m01417n	Transport reactions	0	0	1
21HPRGNLONENo1	Formation of 21-Hydroxypregnenolone (No1)	m02039c + m02555c + m02630c + m02763c + 6.9444e-05 prot_P08686 -> m02040c + m02554c + 21hprgnlone_c	Steroid metabolism	155.546	1000	0.156389
21HPRGNLONEt1	Transport of 21-Hydroxypregnenolone, Active Transport	m01371c + m02040c + 21hprgnlone_c -> m01285c + m02039c + m02751c + 21hprgnlone_s	Transport reactions	1000	1000	1
21HPRGNLONEt2	Transport of 21-Hydroxypregnenolone, Diffusion	21hprgnlone_c -> 21hprgnlone_s	Transport reactions	1000	1000	1
21HPRGNLONEt2_REV	Transport of 21-Hydroxypregnenolone, Diffusion (reversible)	21hprgnlone_s -> 21hprgnlone_c	Transport reactions	1000	1000	1
2H3MVcNo1	Formation of 2-Hydroxy-3-Methyl-Valerate (No1)	1.0046e-06 prot_P07195 + 1.0046e-06 prot_P00338 + pmet_2H3MVc -> m02552c + 2h3mv_c	Valine, leucine, and isoleucine metabolism	563.104	1000	0.56354
2H3MVcNo2	Formation of 2-Hydroxy-3-Methyl-Valerate (No2)	1.0046e-06 prot_P07195 + pmet_2H3MVc -> m02552c + 2h3mv_c	Valine, leucine, and isoleucine metabolism	715.294	1000	0.715578
2H3MVcNo3	Formation of 2-Hydroxy-3-Methyl-Valerate (No3)	1.0046e-06 prot_P00338 + pmet_2H3MVc -> m02552c + 2h3mv_c	Valine, leucine, and isoleucine metabolism	563.104	1000	0.56354
2H3MVcNo4	Formation of 2-Hydroxy-3-Methyl-Valerate (No4)	1.0046e-06 prot_Q8IX04 + pmet_2H3MVc -> m02552c + 2h3mv_c	Valine, leucine, and isoleucine metabolism	761.092	1000	0.76133
2H3MVcNo5	Formation of 2-Hydroxy-3-Methyl-Valerate (No5)	1.0046e-06 prot_P07864 + pmet_2H3MVc -> m02552c + 2h3mv_c	Valine, leucine, and isoleucine metabolism	13.0221	1000	0.014008
2H3MVcNo6	Formation of 2-Hydroxy-3-Methyl-Valerate (No6)	1.0046e-06 prot_Q6ZMR3 + pmet_2H3MVc -> m02552c + 2h3mv_c	Valine, leucine, and isoleucine metabolism	1000	1000	1
2H3MVcNo7	Formation of 2-Hydroxy-3-Methyl-Valerate (No7)	1.0046e-06 prot_Q9BYZ2 + pmet_2H3MVc -> m02552c + 2h3mv_c	Valine, leucine, and isoleucine metabolism	3746.84	1000	3.74409
2H3MVc_REVNo1	Formation of 2-Hydroxy-3-Methyl-Valerate (reversible) (No1)	1.0046e-06 prot_P07195 + 1.0046e-06 prot_P00338 + pmet_2H3MVc_REV -> m00669c + m02039c + m02553c	Valine, leucine, and isoleucine metabolism	563.104	1000	0.56354
2H3MVc_REVNo2	Formation of 2-Hydroxy-3-Methyl-Valerate (reversible) (No2)	1.0046e-06 prot_P07195 + pmet_2H3MVc_REV -> m00669c + m02039c + m02553c	Valine, leucine, and isoleucine metabolism	715.294	1000	0.715578
2H3MVc_REVNo3	Formation of 2-Hydroxy-3-Methyl-Valerate (reversible) (No3)	1.0046e-06 prot_P00338 + pmet_2H3MVc_REV -> m00669c + m02039c + m02553c	Valine, leucine, and isoleucine metabolism	563.104	1000	0.56354
2H3MVc_REVNo4	Formation of 2-Hydroxy-3-Methyl-Valerate (reversible) (No4)	1.0046e-06 prot_Q8IX04 + pmet_2H3MVc_REV -> m00669c + m02039c + m02553c	Valine, leucine, and isoleucine metabolism	761.092	1000	0.76133
2H3MVc_REVNo5	Formation of 2-Hydroxy-3-Methyl-Valerate (reversible) (No5)	1.0046e-06 prot_P07864 + pmet_2H3MVc_REV -> m00669c + m02039c + m02553c	Valine, leucine, and isoleucine metabolism	13.0221	1000	0.014008
2H3MVc_REVNo6	Formation of 2-Hydroxy-3-Methyl-Valerate (reversible) (No6)	1.0046e-06 prot_Q6ZMR3 + pmet_2H3MVc_REV -> m00669c + m02039c + m02553c	Valine, leucine, and isoleucine metabolism	1000	1000	1
2H3MVc_REVNo7	Formation of 2-Hydroxy-3-Methyl-Valerate (reversible) (No7)	1.0046e-06 prot_Q9BYZ2 + pmet_2H3MVc_REV -> m00669c + m02039c + m02553c	Valine, leucine, and isoleucine metabolism	3746.84	1000	3.74409
2H3MVte	Transport of 2-Hydroxy-3-Methyl-Valerate	2h3mv_c -> 2h3mv_s	Transport reactions	1000	1000	1
2H3MVte_REV	Transport of 2-Hydroxy-3-Methyl-Valerate (reversible)	2h3mv_s -> 2h3mv_c	Transport reactions	1000	1000	1
2HATVACIDGLUChrNo1	glucuronidation of 2-hydroxy-atorvastatin-acid in hepatocytes (No1)	5.0875e-08 prot_P35503 + pmet_2HATVACIDGLUChr -> m03106r + 2hatvacidgluc_r	Drug metabolism	1000	1000	1
2HATVACIDGLUChrNo2	glucuronidation of 2-hydroxy-atorvastatin-acid in hepatocytes (No2)	5.0875e-08 prot_P22310 + pmet_2HATVACIDGLUChr -> m03106r + 2hatvacidgluc_r	Drug metabolism	1000	1000	1
2HATVACIDGLUCitr	2HATVACIDGLUCitr	2hatvacidgluc_r -> 2hatvacidgluc_c	Drug metabolism	1000	1000	1
2HATVACIDGLUCitr_REV	2HATVACIDGLUCitr (reversible)	2hatvacidgluc_c -> 2hatvacidgluc_r	Drug metabolism	1000	1000	1
2HATVACIDGLUCtebNo1	efflux of 2-hydroxy-atorvastatin-acyl-glucuronide into bile (No1)	9.4162e-05 prot_Q92887 + pmet_2HATVACIDGLUCteb -> m01285c + m02039c + m02751c + 2hatvacidgluc_s	Drug metabolism	1000	1000	1
2HATVACIDGLUCtebNo2	efflux of 2-hydroxy-atorvastatin-acyl-glucuronide into bile (No2)	9.4162e-05 prot_P08183 + pmet_2HATVACIDGLUCteb -> m01285c + m02039c + m02751c + 2hatvacidgluc_s	Drug metabolism	92.5865	1000	0.093493
2HATVACIDOXDhcNo1	oxidation of atorvastatin acid to 2-hydroxy-atorvastatin-acid in hepatocytes (No1)	0.00010808 prot_P20815 + pmet_2HATVACIDOXDhc -> m02040r + m02554r + 2hatvacid_r	Drug metabolism	1000	1000	1
2HATVACIDOXDhcNo2	oxidation of atorvastatin acid to 2-hydroxy-atorvastatin-acid in hepatocytes (No2)	0.00010808 prot_P10632 + pmet_2HATVACIDOXDhc -> m02040r + m02554r + 2hatvacid_r	Drug metabolism	355.62	1000	0.356264
2HATVACIDOXDhcNo3	oxidation of atorvastatin acid to 2-hydroxy-atorvastatin-acid in hepatocytes (No3)	0.0022222 prot_P08684 + pmet_2HATVACIDOXDhc -> m02040r + m02554r + 2hatvacid_r	Drug metabolism	1000	1000	1
2HATVACIDhcNo1	conversion of 2-hydroxy-atorvastatin-lactone to its acid form in hepatocytes (No1)	m02040c + 2hatvlac_c + 2.2011e-08 prot_Q15166 -> m02039c + 2hatvacid_c	Drug metabolism	2000	1000	1.999
2HATVACIDitr	2HATVACIDitr	2hatvacid_r -> 2hatvacid_c	Drug metabolism	1000	1000	1
2HATVACIDitr_REV	2HATVACIDitr (reversible)	2hatvacid_c -> 2hatvacid_r	Drug metabolism	1000	1000	1
2HATVACIDtebNo1	efflux of 2-hydroxy-atorvastatin-acid into bile (No1)	9.4162e-05 prot_Q92887 + pmet_2HATVACIDteb -> m01285c + m02039c + m02751c + 2hatvacid_s	Drug metabolism	3000	1000	2.998
2HATVACIDtebNo2	efflux of 2-hydroxy-atorvastatin-acid into bile (No2)	9.4162e-05 prot_P08183 + pmet_2HATVACIDteb -> m01285c + m02039c + m02751c + 2hatvacid_s	Drug metabolism	92.5865	1000	0.093493
2HATVACIDtep	efflux of 2-hydroxy-atorvastatin-acid into portal blood	2hatvacid_c -> 2hatvacid_s	Drug metabolism	1000	1000	1
2HATVACIDtep_REV	efflux of 2-hydroxy-atorvastatin-acid into portal blood (reversible)	2hatvacid_s -> 2hatvacid_c	Drug metabolism	1000	1000	1
2HATVACIDthc	uptake of 2-hydroxy-atorvastatin-acid into hepatocytes	m02046c + 2hatvacid_s -> m02046s + 2hatvacid_c	Drug metabolism	1000	1000	1
2HATVACIDthc_REV	uptake of 2-hydroxy-atorvastatin-acid into hepatocytes (reversible)	m02046s + 2hatvacid_c -> m02046c + 2hatvacid_s	Drug metabolism	1000	1000	1
2HATVLACGLUChrNo1	glucuronidation of 2-hydroxy-atorvastatin-lactone in hepatocytes (No1)	5.0875e-08 prot_P35503 + pmet_2HATVLACGLUChr -> m02039r + m03106r + 2hatvlacgluc_r	Drug metabolism	1000	1000	1
2HATVLACGLUChrNo2	glucuronidation of 2-hydroxy-atorvastatin-lactone in hepatocytes (No2)	5.0875e-08 prot_P22310 + pmet_2HATVLACGLUChr -> m02039r + m03106r + 2hatvlacgluc_r	Drug metabolism	1000	1000	1
2HATVLACGLUCitr	2HATVLACGLUCitr	2hatvlacgluc_r -> 2hatvlacgluc_c	Drug metabolism	1000	1000	1
2HATVLACGLUCitr_REV	2HATVLACGLUCitr (reversible)	2hatvlacgluc_c -> 2hatvlacgluc_r	Drug metabolism	1000	1000	1
2HATVLACGLUCtebNo1	efflux of 2-hydroxy-atorvastatin-lactone-glucuronide into bile (No1)	9.4162e-05 prot_Q92887 + pmet_2HATVLACGLUCteb -> m01285c + m02039c + m02751c + 2hatvlacgluc_s	Drug metabolism	1000	1000	1
2HATVLACGLUCtebNo2	efflux of 2-hydroxy-atorvastatin-lactone-glucuronide into bile (No2)	9.4162e-05 prot_P08183 + pmet_2HATVLACGLUCteb -> m01285c + m02039c + m02751c + 2hatvlacgluc_s	Drug metabolism	92.5865	1000	0.093493
2HATVLACOXDhcNo1	oxidation of atorvastatin lactone to 2-hydroxy-atorvastatin-lactone in hepatocytes (No1)	0.00010808 prot_P20815 + pmet_2HATVLACOXDhc -> m02040r + m02554r + 2hatvlac_r	Drug metabolism	1000	1000	1
2HATVLACOXDhcNo2	oxidation of atorvastatin lactone to 2-hydroxy-atorvastatin-lactone in hepatocytes (No2)	0.0022222 prot_P08684 + pmet_2HATVLACOXDhc -> m02040r + m02554r + 2hatvlac_r	Drug metabolism	1000	1000	1
2HATVLAChc	conversion of 2-hydroxy-atorvastatin-acid to its lactone form in hepatocytes	m01371c + 2hatvacid_c -> m01334c + m02759c + 2hatvlac_c	Drug metabolism	1000	1000	1
2HATVLACtebNo1	efflux of 2-hydroxy-atorvastatin-lactone into bile (No1)	9.4162e-05 prot_Q92887 + pmet_2HATVLACteb -> m01285c + m02039c + m02751c + 2hatvlac_s	Drug metabolism	3000	1000	2.998
2HATVLACtebNo2	efflux of 2-hydroxy-atorvastatin-lactone into bile (No2)	9.4162e-05 prot_P08183 + pmet_2HATVLACteb -> m01285c + m02039c + m02751c + 2hatvlac_s	Drug metabolism	92.5865	1000	0.093493
2HATVLACtep	efflux of 2-hydroxy-atorvastatin-lactone into portal blood	2hatvlac_c -> 2hatvlac_s	Drug metabolism	1000	1000	1
2HATVLACtep_REV	efflux of 2-hydroxy-atorvastatin-lactone into portal blood (reversible)	2hatvlac_s -> 2hatvlac_c	Drug metabolism	1000	1000	1
2HATVLACthc	uptake of 2-hydroxy-atorvastatin-lactone into hepatocytes	m02046c + 2hatvlac_s -> m02046s + 2hatvlac_c	Drug metabolism	1000	1000	1
2HATVLACthc_REV	uptake of 2-hydroxy-atorvastatin-lactone into hepatocytes (reversible)	m02046s + 2hatvlac_c -> m02046c + 2hatvlac_s	Drug metabolism	1000	1000	1
2HIBUPGLUC_Sitr	2HIBUPGLUC_Sitr	2hibupglu_S_r -> 2hibupglu_S_c	Drug metabolism	1000	1000	1
2HIBUPGLUC_Sitr_REV	2HIBUPGLUC_Sitr (reversible)	2hibupglu_S_c -> 2hibupglu_S_r	Drug metabolism	1000	1000	1
2HIBUPGLUC_Sthv	release of 2-hydroxy S-ibuprofen-glucuronide into hepatic vein	2hibupglu_S_c -> 2hibupglu_S_s	Drug metabolism	1000	1000	1
2HIBUPGLUC_Sthv_REV	release of 2-hydroxy S-ibuprofen-glucuronide into hepatic vein (reversible)	2hibupglu_S_s -> 2hibupglu_S_c	Drug metabolism	1000	1000	1
2HIBUP_Ritr	2HIBUP_Ritr	2hibup_R_r -> 2hibup_R_c	Drug metabolism	1000	1000	1
2HIBUP_Ritr_REV	2HIBUP_Ritr (reversible)	2hibup_R_c -> 2hibup_R_r	Drug metabolism	1000	1000	1
2HIBUP_Rthv	release of R-2-hydroxy-ibuprofen into hepatic vein	2hibup_R_c -> 2hibup_R_s	Drug metabolism	1000	1000	1
2HIBUP_Rthv_REV	release of R-2-hydroxy-ibuprofen into hepatic vein (reversible)	2hibup_R_s -> 2hibup_R_c	Drug metabolism	1000	1000	1
2HIBUP_SGLUhepNo1	glucuronidation of S-2-hydroxy ibuprofen (No1)	5.0875e-08 prot_P16662 + pmet_2HIBUP_SGLUhep -> m03106r + 2hibupglu_S_r	Drug metabolism	1000	1000	1
2HIBUP_SGLUhepNo2	glucuronidation of S-2-hydroxy ibuprofen (No2)	5.0875e-08 prot_O60656 + pmet_2HIBUP_SGLUhep -> m03106r + 2hibupglu_S_r	Drug metabolism	1000	1000	1
2HIBUP_SGLUhepNo3	glucuronidation of S-2-hydroxy ibuprofen (No3)	5.0875e-08 prot_P35503 + pmet_2HIBUP_SGLUhep -> m03106r + 2hibupglu_S_r	Drug metabolism	1000	1000	1
2HIBUP_Sitr	2HIBUP_Sitr	2hibup_S_r -> 2hibup_S_c	Drug metabolism	1000	1000	1
2HIBUP_Sitr_REV	2HIBUP_Sitr (reversible)	2hibup_S_c -> 2hibup_S_r	Drug metabolism	1000	1000	1
2HIBUP_Sthv	release of S-2-hydroxy-ibuprofen into hepatic vein	2hibup_S_c -> 2hibup_S_s	Drug metabolism	1000	1000	1
2HIBUP_Sthv_REV	release of S-2-hydroxy-ibuprofen into hepatic vein (reversible)	2hibup_S_s -> 2hibup_S_c	Drug metabolism	1000	1000	1
2HIVcNo1	Formation of 2-Hydroxy-Isovalerate (No1)	1.0046e-06 prot_P07195 + 1.0046e-06 prot_P00338 + pmet_2HIVc -> m02552c + 2hiv_c	Valine, leucine, and isoleucine metabolism	563.104	1000	0.56354
2HIVcNo2	Formation of 2-Hydroxy-Isovalerate (No2)	1.0046e-06 prot_P07195 + pmet_2HIVc -> m02552c + 2hiv_c	Valine, leucine, and isoleucine metabolism	715.294	1000	0.715578
2HIVcNo3	Formation of 2-Hydroxy-Isovalerate (No3)	1.0046e-06 prot_P00338 + pmet_2HIVc -> m02552c + 2hiv_c	Valine, leucine, and isoleucine metabolism	563.104	1000	0.56354
2HIVcNo4	Formation of 2-Hydroxy-Isovalerate (No4)	1.0046e-06 prot_Q8IX04 + pmet_2HIVc -> m02552c + 2hiv_c	Valine, leucine, and isoleucine metabolism	761.092	1000	0.76133
2HIVcNo5	Formation of 2-Hydroxy-Isovalerate (No5)	1.0046e-06 prot_P07864 + pmet_2HIVc -> m02552c + 2hiv_c	Valine, leucine, and isoleucine metabolism	13.0221	1000	0.014008
2HIVcNo6	Formation of 2-Hydroxy-Isovalerate (No6)	1.0046e-06 prot_Q6ZMR3 + pmet_2HIVc -> m02552c + 2hiv_c	Valine, leucine, and isoleucine metabolism	1000	1000	1
2HIVcNo7	Formation of 2-Hydroxy-Isovalerate (No7)	1.0046e-06 prot_Q9BYZ2 + pmet_2HIVc -> m02552c + 2hiv_c	Valine, leucine, and isoleucine metabolism	3746.84	1000	3.74409
2HIVc_REVNo1	Formation of 2-Hydroxy-Isovalerate (reversible) (No1)	1.0046e-06 prot_P07195 + 1.0046e-06 prot_P00338 + pmet_2HIVc_REV -> m00824c + m02039c + m02553c	Valine, leucine, and isoleucine metabolism	563.104	1000	0.56354
2HIVc_REVNo2	Formation of 2-Hydroxy-Isovalerate (reversible) (No2)	1.0046e-06 prot_P07195 + pmet_2HIVc_REV -> m00824c + m02039c + m02553c	Valine, leucine, and isoleucine metabolism	715.294	1000	0.715578
2HIVc_REVNo3	Formation of 2-Hydroxy-Isovalerate (reversible) (No3)	1.0046e-06 prot_P00338 + pmet_2HIVc_REV -> m00824c + m02039c + m02553c	Valine, leucine, and isoleucine metabolism	563.104	1000	0.56354
2HIVc_REVNo4	Formation of 2-Hydroxy-Isovalerate (reversible) (No4)	1.0046e-06 prot_Q8IX04 + pmet_2HIVc_REV -> m00824c + m02039c + m02553c	Valine, leucine, and isoleucine metabolism	761.092	1000	0.76133
2HIVc_REVNo5	Formation of 2-Hydroxy-Isovalerate (reversible) (No5)	1.0046e-06 prot_P07864 + pmet_2HIVc_REV -> m00824c + m02039c + m02553c	Valine, leucine, and isoleucine metabolism	13.0221	1000	0.014008
2HIVc_REVNo6	Formation of 2-Hydroxy-Isovalerate (reversible) (No6)	1.0046e-06 prot_Q6ZMR3 + pmet_2HIVc_REV -> m00824c + m02039c + m02553c	Valine, leucine, and isoleucine metabolism	1000	1000	1
2HIVc_REVNo7	Formation of 2-Hydroxy-Isovalerate (reversible) (No7)	1.0046e-06 prot_Q9BYZ2 + pmet_2HIVc_REV -> m00824c + m02039c + m02553c	Valine, leucine, and isoleucine metabolism	3746.84	1000	3.74409
2HIVte	Transport of 2-Hydroxy-Isovalerate	2hiv_c -> 2hiv_s	Transport reactions	1000	1000	1
2HIVte_REV	Transport of 2-Hydroxy-Isovalerate (reversible)	2hiv_s -> 2hiv_c	Transport reactions	1000	1000	1
2HXIC_Lt1e	Transport of 2-Hydroxy-Isocaproate, Extracellular, Uptake	2hxic_L_s -> 2hxic_L_c	Transport reactions	1000	1000	1
2HXIC_Lt2e	Transport of 2-Hydroxy-Isocaproate, Extracellular, Secretion	2hxic_L_c -> 2hxic_L_s	Transport reactions	1000	1000	1
2HYDOGOAT3t	Transport of 2-Hydroxy-Glutarate, Extracellular, Antiport	m01306s + 2hydog_c -> m01306c + 2hydog_s	Transport reactions	1000	1000	1
2HYDOGOAT3t_REV	Transport of 2-Hydroxy-Glutarate, Extracellular, Antiport (reversible)	m01306c + 2hydog_s -> m01306s + 2hydog_c	Transport reactions	1000	1000	1
2HYDOGte	Transport of 2-Hydroxy-Glutarate, Extracellular	2hydog_c -> 2hydog_s	Transport reactions	1000	1000	1
2HYOXPLCte	2-Hydroxyphenylacetate Proton Symport, Cytosol	m00654c + m02039c -> m02039s + m00654s	Transport reactions	965.483	1000	0.965518
2HYOXPLCte_REV	2-Hydroxyphenylacetate Proton Symport, Cytosol (reversible)	m02039s + m00654s -> m00654c + m02039c	Transport reactions	965.483	1000	0.965518
2M3HBUc	Formation of 2-Methyl-3-Hydroxy-Butyrate	m00171m + m02040m -> m01597m + m02039m + 2m3hbu_m	Valine, leucine, and isoleucine metabolism	714.329	1000	0.714614
2M3HBUte	Transport of 2-Methyl-3-Hydroxy-Butyrate, Extracellular	2m3hbu_c -> 2m3hbu_s	Transport reactions	714.329	1000	0.714614
2M3HBUtm	Transport of 2-Methyl-3-Hydroxy-Butyrate, Mitochondrial	2m3hbu_m -> 2m3hbu_c	Transport reactions	714.329	1000	0.714614
2M3HVACc	Formation of 2-Methyl-3-Hydroxy-Valerate	m02039c + m02553c + 2m3ovac_c -> m02552c + 2m3hvac_c	Propanoate metabolism	1000	1000	1
2M3HVACc_REV	Formation of 2-Methyl-3-Hydroxy-Valerate (reversible)	m02552c + 2m3hvac_c -> m02039c + m02553c + 2m3ovac_c	Propanoate metabolism	1000	1000	1
2M3HVACte	Transport of 2-Methyl-3-Hydroxy-Valerate	2m3hvac_c -> 2m3hvac_s	Transport reactions	680.277	1000	0.680597
2M3OVACm	Formation of 2-Methyl-3-Oxo-Valerate	m02040m + 2m3ovcoa_m -> m01597m + m02039m + 2m3ovac_m	Propanoate metabolism	680.277	1000	0.680597
2M3OVACtm	Transport of 2-Methyl-3-Oxo-Valerate, Mitochondrial	2m3ovac_m -> 2m3ovac_c	Transport reactions	680.277	1000	0.680597
2M3OVCOAmNo1	Formation of 2-Methyl-3-Oxo-Valeryl Coa (No1)	2 m02774m + 1.4172e-07 prot_P24752 -> m01597m + 2m3ovcoa_m	Propanoate metabolism	680.277	1000	0.680597
2M3OVCOAm_REVNo1	Formation of 2-Methyl-3-Oxo-Valeryl Coa (reversible) (No1)	m01597m + 2m3ovcoa_m + 1.4172e-07 prot_P24752 -> 2 m02774m	Propanoate metabolism	680.277	1000	0.680597
2MB2COAc	Transport of 2-Methylcrotonoyl Coenzyme A into Cytosol	m02999m -> m02999c	Fatty acid oxidation	1042.73	1000	1.04268
2MB2COAc_REV	Transport of 2-Methylcrotonoyl Coenzyme A into Cytosol (reversible)	m02999c -> m02999m	Fatty acid oxidation	1042.73	1000	1.04268
2OBUTt	Transport by Monocarboxylate Transporter-2 into Extracellular Space	m02039s + m00671s -> m00671c + m02039c	Transport reactions	588.219	1000	0.588631
2OBUTt_REV	Transport by Monocarboxylate Transporter-2 into Extracellular Space (reversible)	m00671c + m02039c -> m02039s + m00671s	Transport reactions	588.219	1000	0.588631
2OXOADPt	Transport of 2-Oxoadipate by Alpha-Ketoglutarate Antiport	m00670c + m01306s -> m01306c + m00670s	Transport reactions	1000	1000	1
2OXOADPt_REV	Transport of 2-Oxoadipate by Alpha-Ketoglutarate Antiport (reversible)	m01306c + m00670s -> m00670c + m01306s	Transport reactions	1000	1000	1
2PGtr	Transport of 2-Phospho-D-Glycerate	m00674s -> m00674c	Transport reactions	1000	1000	1
2PGtr_REV	Transport of 2-Phospho-D-Glycerate (reversible)	m00674c -> m00674s	Transport reactions	1000	1000	1
31DMThr	demethylation of tacrolimus to 31-O-desmethyl tacrolimus in hepatocytes	m02039r + m02871r + tacr_r -> m02877r + 31dmt_r	Drug metabolism	1000	1000	1
31DMTitr	31DMTitr	31dmt_r -> 31dmt_c	Drug metabolism	1000	1000	1
31DMTitr_REV	31DMTitr (reversible)	31dmt_c -> 31dmt_r	Drug metabolism	1000	1000	1
31DMTtep	exit of 31-O-desmethyl tacrolimus into portal blood	31dmt_c -> 31dmt_s	Drug metabolism	1000	1000	1
31DMTtep_REV	exit of 31-O-desmethyl tacrolimus into portal blood (reversible)	31dmt_s -> 31dmt_c	Drug metabolism	1000	1000	1
31DMTtu	efflux of 31-O-desmethyl tacrolimus into intestinal lumen by ABC transporter	m01371c + m02040c + 31dmt_c -> m01285c + m02039c + m02751c + 31dmt_s	Drug metabolism	1000	1000	1
34DHOXMANDte	3, 4-Dihydroxymandelate Transport, Cytosol	m00727c -> m00727s	Transport reactions	1000	1000	1
34DHOXMANDte_REV	3, 4-Dihydroxymandelate Transport, Cytosol (reversible)	m00727s -> m00727c	Transport reactions	1000	1000	1
34DHPEARNo1	3, 4-Dihydroxyphenylethanol:NADP+ Reductase (No1)	m00728c + m02039c + m02555c + 2.924e-05 prot_P14550 -> m02554c + 34dhpe_c	Tyrosine metabolism	530.999	1000	0.531467
34DHPEt	Transport of 3, 4-Dihydroxyphenylethanol via Passive Diffusion	34dhpe_s -> 34dhpe_c	Transport reactions	1000	1000	1
34DHPEt_REV	Transport of 3, 4-Dihydroxyphenylethanol via Passive Diffusion (reversible)	34dhpe_c -> 34dhpe_s	Transport reactions	1000	1000	1
34DHPHAte	(3, 4-Dihydroxyphenyl)Acetate (Dopac) Transport, Cytosol	m00729c -> m00729s	Transport reactions	1000	1000	1
34DHPHAte_REV	(3, 4-Dihydroxyphenyl)Acetate (Dopac) Transport, Cytosol (reversible)	m00729s -> m00729c	Transport reactions	1000	1000	1
34DHPHELAT1tc	Transport of 3, 4-Dihydroxy-L-Phenylalanine by Lat1 in Association with 4F2Hc, Across the Apical Surface of the Membranes	m02354s + m02360c -> m02354c + m02360s	Transport reactions	694.911	1000	0.695216
34HPLFM	3- (4-Hydroxyphenyl-)Lactate Formation	m01005m + m02039m + m02553m -> m02552m + m01004m	Ubiquinone synthesis	1000	1000	1
34HPLte	Transport of 3- (4-Hydroxyphenyl)Lactate	m01004c + m02039c -> m02039s + m01004s	Transport reactions	1000	1000	1
34HPLte_REV	Transport of 3- (4-Hydroxyphenyl)Lactate (reversible)	m02039s + m01004s -> m01004c + m02039c	Transport reactions	1000	1000	1
34HPLtm	Transport of 3-(4-Hydroxyphenyl)Lactate, Mitochondrial	m01004c + m02039c -> m02039m + m01004m	Transport reactions	1000	1000	1
34HPLtm_REV	Transport of 3-(4-Hydroxyphenyl)Lactate, Mitochondrial (reversible)	m02039m + m01004m -> m01004c + m02039c	Transport reactions	1000	1000	1
34HPPte	Transport of 3- (4-Hydroxyphenyl)Pyruvate	m01005s -> m01005c	Transport reactions	1000	1000	1
34HPPte_REV	Transport of 3- (4-Hydroxyphenyl)Pyruvate (reversible)	m01005c -> m01005s	Transport reactions	1000	1000	1
35DHPVShcNo1	conversion of pravastatin to 3-alpha-5-beta-dihydroxy pravastatin in entercoytes (No1)	m02039r + 2 m02555r + 2 m02630r + pvs_r + 0.0022222 prot_P08684 -> 2 m02040r + 2 m02554r + 35dhpvs_r	Drug metabolism	973.948	1000	0.973974
35DHPVSitr	35DHPVSitr	35dhpvs_r -> 35dhpvs_c	Drug metabolism	1000	1000	1
35DHPVSitr_REV	35DHPVSitr (reversible)	35dhpvs_c -> 35dhpvs_r	Drug metabolism	1000	1000	1
35DHPVStep	3-alpha-5-beta-dihydroxy pravastatin exit into portal blood	35dhpvs_c -> 35dhpvs_s	Drug metabolism	1000	1000	1
35DHPVStep_REV	3-alpha-5-beta-dihydroxy pravastatin exit into portal blood (reversible)	35dhpvs_s -> 35dhpvs_c	Drug metabolism	1000	1000	1
35DHPVSthc	uptake of 3-alpha-5-beta-dihydroxy pravastatin by hepatocytes	m02046c + 35dhpvs_s -> m02046s + 35dhpvs_c	Drug metabolism	1000	1000	1
35DHPVSthc_REV	uptake of 3-alpha-5-beta-dihydroxy pravastatin by hepatocytes (reversible)	m02046s + 35dhpvs_c -> m02046c + 35dhpvs_s	Drug metabolism	1000	1000	1
35DIODTYRte	Transport of 3, 5-Diiodo-L-Tyrosine	m00739c + m02519s -> m02519c + m00739s	Transport reactions	1000	1000	1
35DIODTYRte_REV	Transport of 3, 5-Diiodo-L-Tyrosine (reversible)	m02519c + m00739s -> m00739c + m02519s	Transport reactions	1000	1000	1
35DSMVhepNo1	formation of 3,5-dihydrodoil simvastatin (No1)	0.00010808 prot_P10635 + pmet_35DSMVhep -> m02554r + 35dsmv_r	Drug metabolism	1000	1000	1
35DSMVhepNo2	formation of 3,5-dihydrodoil simvastatin (No2)	0.00010808 prot_P20815 + pmet_35DSMVhep -> m02554r + 35dsmv_r	Drug metabolism	1000	1000	1
35DSMVhepNo3	formation of 3,5-dihydrodoil simvastatin (No3)	0.00010808 prot_P10632 + pmet_35DSMVhep -> m02554r + 35dsmv_r	Drug metabolism	355.62	1000	0.356264
35DSMVhepNo4	formation of 3,5-dihydrodoil simvastatin (No4)	0.0022222 prot_P08684 + pmet_35DSMVhep -> m02554r + 35dsmv_r	Drug metabolism	1000	1000	1
35DSMVitr	35DSMVitr	35dsmv_r -> 35dsmv_c	Drug metabolism	1000	1000	1
35DSMVitr_REV	35DSMVitr (reversible)	35dsmv_c -> 35dsmv_r	Drug metabolism	1000	1000	1
35DSMVteb	efflux of 3,5-dihydrodiol-simvastatin-lactone form into bile	m01371c + m02040c + 35dsmv_c -> m01285c + m02039c + m02751c + 35dsmv_s	Drug metabolism	1000	1000	1
3AIBSYMPt	3-Amino-Isobutyrate Transport, Sodium Symport	m02325s + 2 m02519s -> m02325c + 2 m02519c	Transport reactions	1000	1000	1
3AIBSYMPt_REV	3-Amino-Isobutyrate Transport, Sodium Symport (reversible)	m02325c + 2 m02519c -> m02325s + 2 m02519s	Transport reactions	1000	1000	1
3AIB_Dtm	Transport of 3Aib_D into Mitochondria	m01633c -> m01633m	Transport reactions	1000	1000	1
3AIB_Dtm_REV	Transport of 3Aib_D into Mitochondria (reversible)	m01633m -> m01633c	Transport reactions	1000	1000	1
3AIBt1	3-Amino-Isobutyrate Transport, Proton Symport	m02039s + m02325s -> m02039c + m02325c	Transport reactions	1000	1000	1
3AIBt1_REV	3-Amino-Isobutyrate Transport, Proton Symport (reversible)	m02039c + m02325c -> m02039s + m02325s	Transport reactions	1000	1000	1
3ANTHRNtr	Transport of 3-Hydroxyanthranilate	m00775s -> m00775c	Transport reactions	1000	1000	1
3ANTHRNtr_REV	Transport of 3-Hydroxyanthranilate (reversible)	m00775c -> m00775s	Transport reactions	1000	1000	1
3BCRNtr	Transport of 3-Hydroxy Butyryl Carnitine	3bcrn_s -> 3bcrn_c	Transport reactions	1000	1000	1
3BCRNtr_REV	Transport of 3-Hydroxy Butyryl Carnitine (reversible)	3bcrn_c -> 3bcrn_s	Transport reactions	1000	1000	1
3DDCRNtr	Transport of 3-Hydroxydodecanoylcarnitine	3ddcrn_s -> 3ddcrn_c	Transport reactions	1000	1000	1
3DDCRNtr_REV	Transport of 3-Hydroxydodecanoylcarnitine (reversible)	3ddcrn_c -> 3ddcrn_s	Transport reactions	1000	1000	1
3DECCRNtr	Transport of 3-Hydroxydecanoylcarnitine	3deccrn_s -> 3deccrn_c	Transport reactions	1000	1000	1
3DECCRNtr_REV	Transport of 3-Hydroxydecanoylcarnitine (reversible)	3deccrn_c -> 3deccrn_s	Transport reactions	1000	1000	1
3DHCASNo1	3-dehydrocholic acid formation (No1)	m01445c + m02039c + m02555c + m02630c + 0.0022222 prot_P08684 -> 2 m02040c + m02554c + 3dhchol_c	Bile acid biosynthesis	1000	1000	1
3DHCDCASNo1	3-dehydro-chenodehydroxycholic acid formation (No1)	m02039c + m02555c + m02630c + C02528_c + 0.0022222 prot_P08684 -> 2 m02040c + m02554c + 3dhcdchol_c	Bile acid biosynthesis	1000	1000	1
3DHCDCHOLabc	3-Dehydrochenodeoxycholic acid ABC bile acid transporter	m01371c + m02040c + 3dhcdchol_c -> m01285c + m02039c + m02751c + 3dhcdchol_s	Transport reactions	4755.26	1000	4.7515
3DHCDCHOLt	3-Dehydrochenodeoxycholic acid transport via bicarbonate countertransport	m02046c + 3dhcdchol_s -> m02046s + 3dhcdchol_c	Transport reactions	2755.26	1000	2.7535
3DHCDCHOLt2	3-Dehydrochenodeoxycholic acid transport via sodium cotransport	2 m02519s + 3dhcdchol_s -> 2 m02519c + 3dhcdchol_c	Transport reactions	1000	1000	1
3DHCDCHOLt_REV	3-Dehydrochenodeoxycholic acid transport via bicarbonate countertransport (reversible)	m02046s + 3dhcdchol_c -> m02046c + 3dhcdchol_s	Transport reactions	2755.26	1000	2.7535
3DHCHOLabc	3-Dehydrocholic acid ABC bile acid transporter	m01371c + m02040c + 3dhchol_c -> m01285c + m02039c + m02751c + 3dhchol_s	Transport reactions	4755.26	1000	4.7515
3DHCHOLt	3-Dehydrocholic acid transport via bicarbonate countertransport	m02046c + 3dhchol_s -> m02046s + 3dhchol_c	Transport reactions	2755.26	1000	2.7535
3DHCHOLt2	3-Dehydrocholic acid transport via sodium cotransport	2 m02519s + 3dhchol_s -> 2 m02519c + 3dhchol_c	Transport reactions	1000	1000	1
3DHCHOLt_REV	3-Dehydrocholic acid transport via bicarbonate countertransport (reversible)	m02046s + 3dhchol_c -> m02046c + 3dhchol_s	Transport reactions	2755.26	1000	2.7535
3DHDCASNo1	3-dehydro-deoxycholic acid formation (No1)	m00745c + m02039c + m02555c + m02630c + 0.0022222 prot_P08684 -> 2 m02040c + m02554c + 3dhdchol_c	Bile acid biosynthesis	1000	1000	1
3DHDCAabc	3-dehydro-deoxycholic acid ABC bile acid transporter	m01371c + m02040c + 3dhdchol_c -> m01285c + m02039c + m02751c + 3dhdchol_s	Transport reactions	4755.26	1000	4.7515
3DHDCAt	3-dehydro-deoxycholic acid transport via bicarbonate countertransport	m02046c + 3dhdchol_s -> m02046s + 3dhdchol_c	Transport reactions	2755.26	1000	2.7535
3DHDCAt2	3-dehydro-deoxycholic acid transport via sodium cotransport	2 m02519s + 3dhdchol_s -> 2 m02519c + 3dhdchol_c	Transport reactions	1000	1000	1
3DHDCAt_REV	3-dehydro-deoxycholic acid transport via bicarbonate countertransport (reversible)	m02046s + 3dhdchol_c -> m02046c + 3dhdchol_s	Transport reactions	2755.26	1000	2.7535
3DHLCASNo1	3-dehydro-lithocholic acid formation (No1)	m02039c + m02402c + m02555c + m02630c + 0.0022222 prot_P08684 -> 2 m02040c + m02554c + 3dhlchol_c	Bile acid biosynthesis	1000	1000	1
3DHLCAabc	3-dehydro-lithocholic acid ABC bile acid transporter	m01371c + m02040c + 3dhlchol_c -> m01285c + m02039c + m02751c + 3dhlchol_s	Transport reactions	4755.26	1000	4.7515
3DHLCAt	3-dehydro-lithocholic acid transport via bicarbonate countertransport	m02046c + 3dhlchol_s -> m02046s + 3dhlchol_c	Transport reactions	2755.26	1000	2.7535
3DHLCAt2	3-dehydro-lithocholic acid transport via sodium cotransport	2 m02519s + 3dhlchol_s -> 2 m02519c + 3dhlchol_c	Transport reactions	1000	1000	1
3DHLCAt_REV	3-dehydro-lithocholic acid transport via bicarbonate countertransport (reversible)	m02046s + 3dhlchol_c -> m02046c + 3dhlchol_s	Transport reactions	2755.26	1000	2.7535
3DPHBH1	Hydroxylation of 3-Decaprenyl-4-Hydroxybenzoate (NADH)	m00767m + m02039m + m02553m + m02630m -> m00725m + m02040m + m02552m	Ubiquinone synthesis	160.823	166.667	0.96515
3H3MGLTc	Formation of 3-Hydroxy-3-Methyl-Glutarate	m02040c + m02131c -> m01597c + m02039c + 3h3mglt_c	Valine, leucine, and isoleucine metabolism	1000	1000	1
3H3MGLTte	Transport of 3-Hydroxy-3-Methyl-Glutarate	3h3mglt_c -> 3h3mglt_s	Transport reactions	1000	1000	1
3HADICOAxNo1	Formation of 3-Hydroxy-Adipoyl Coa (No1)	1.5288e-07 prot_Q08426 + 1.5288e-07 prot_Q15067 + pmet_3HADICOAx -> m02041p + 3hadicoa_p	Fatty acid oxidation	766.998	1000	0.76723
3HADICOAxNo2	Formation of 3-Hydroxy-Adipoyl Coa (No2)	8.0051e-05 prot_Q15067 + 8.0051e-05 prot_Q13011 + pmet_3HADICOAx -> m02041p + 3hadicoa_p	Fatty acid oxidation	1000	1000	1
3HADPACte	Transport of 3-Hydroxy-Adipate, Extracellular	3hadpac_c -> 3hadpac_s	Transport reactions	1000	1000	1
3HADPACtxc	Transport of 3-Hydroxy-Adipate, Peroxisomal	3hadpac_p -> 3hadpac_c	Transport reactions	1000	1000	1
3HADPACx	Formation of 3-Hydroxy-Adipate	m02040p + 3hadicoa_p -> m01597p + m02039p + 3hadpac_p	Fatty acid oxidation	1000	1000	1
3HBCOAHLm	3-Hydroxyisobutyryl Coenzyme A Hydrolase, Mitochondrial	m02040m + 3hibutcoa_m -> m00784m + m01597m + m02039m	Valine, leucine, and isoleucine metabolism	0	0	1
3HBCOARc	Transport of (R)-3-Hydroxybutanoyl Coenzyme A into Cytosol	m00159m -> m00159c	Fatty acid oxidation	1042.73	1000	1.04268
3HBCOARc_REV	Transport of (R)-3-Hydroxybutanoyl Coenzyme A into Cytosol (reversible)	m00159c -> m00159m	Fatty acid oxidation	1042.73	1000	1.04268
3HCINNMsec	3-Hydroxycinanmic Acid Secretion	3hcinnm_c -> 3hcinnm_s	Transport reactions	1000	1000	1
3HCINNMup	3-Hydroxycinnamic Acid Uptake	3hcinnm_s -> 3hcinnm_c	Transport reactions	1000	1000	1
3HDECECRNtr	Transport of 3-Hydroxyhexadecenoylcarnitine	3hdececrn_s -> 3hdececrn_c	Transport reactions	1000	1000	1
3HDECECRNtr_REV	Transport of 3-Hydroxyhexadecenoylcarnitine (reversible)	3hdececrn_c -> 3hdececrn_s	Transport reactions	1000	1000	1
3HEXDCRNtr	Transport of 3-Hydroxyhexadecanoylcarnitine	3hexdcrn_s -> 3hexdcrn_c	Transport reactions	1000	1000	1
3HEXDCRNtr_REV	Transport of 3-Hydroxyhexadecanoylcarnitine (reversible)	3hexdcrn_c -> 3hexdcrn_s	Transport reactions	1000	1000	1
3HGLUTCOAm	Acyl Coenzyme A Dehydrogenase for Glutaryl Coenzyme A, Forming 3-Hydroxy-Glutaryl Coenzyme A	m02040m + td2glutrcoa_m -> 3hglutcoa_m	Lysine metabolism	1000	1000	1
3HIBUPGLUC_Sitr	3HIBUPGLUC_Sitr	3hibupglu_S_r -> 3hibupglu_S_c	Drug metabolism	1000	1000	1
3HIBUPGLUC_Sitr_REV	3HIBUPGLUC_Sitr (reversible)	3hibupglu_S_c -> 3hibupglu_S_r	Drug metabolism	1000	1000	1
3HIBUPGLUC_Sthv	release of 3-hydroxy S-ibuprofen-glucuronide into hepatic vein	3hibupglu_S_c -> 3hibupglu_S_s	Drug metabolism	1000	1000	1
3HIBUPGLUC_Sthv_REV	release of 3-hydroxy S-ibuprofen-glucuronide into hepatic vein (reversible)	3hibupglu_S_s -> 3hibupglu_S_c	Drug metabolism	1000	1000	1
3HIBUP_Ritr	3HIBUP_Ritr	3hibup_R_r -> 3hibup_R_c	Drug metabolism	1000	1000	1
3HIBUP_Ritr_REV	3HIBUP_Ritr (reversible)	3hibup_R_c -> 3hibup_R_r	Drug metabolism	1000	1000	1
3HIBUP_Rthv	release of R-3-hydroxy-ibuprofen into hepatic vein	3hibup_R_c -> 3hibup_R_s	Drug metabolism	1000	1000	1
3HIBUP_Rthv_REV	release of R-3-hydroxy-ibuprofen into hepatic vein (reversible)	3hibup_R_s -> 3hibup_R_c	Drug metabolism	1000	1000	1
3HIBUP_SGLUhepNo1	glucuronidation of S-3-hydroxy ibuprofen (No1)	5.0875e-08 prot_P16662 + pmet_3HIBUP_SGLUhep -> m03106r + 3hibupglu_S_r	Drug metabolism	1000	1000	1
3HIBUP_SGLUhepNo2	glucuronidation of S-3-hydroxy ibuprofen (No2)	5.0875e-08 prot_O60656 + pmet_3HIBUP_SGLUhep -> m03106r + 3hibupglu_S_r	Drug metabolism	1000	1000	1
3HIBUP_SGLUhepNo3	glucuronidation of S-3-hydroxy ibuprofen (No3)	5.0875e-08 prot_P35503 + pmet_3HIBUP_SGLUhep -> m03106r + 3hibupglu_S_r	Drug metabolism	1000	1000	1
3HIBUP_Sitr	3HIBUP_Sitr	3hibup_S_r -> 3hibup_S_c	Drug metabolism	1000	1000	1
3HIBUP_Sitr_REV	3HIBUP_Sitr (reversible)	3hibup_S_c -> 3hibup_S_r	Drug metabolism	1000	1000	1
3HIBUP_Sthv	release of S-3-hydroxy-ibuprofen into hepatic vein	3hibup_S_c -> 3hibup_S_s	Drug metabolism	1000	1000	1
3HIBUP_Sthv_REV	release of S-3-hydroxy-ibuprofen into hepatic vein (reversible)	3hibup_S_s -> 3hibup_S_c	Drug metabolism	1000	1000	1
3HIVAcm	Formation of 3-Hydroxy-Isovalerate	m02040m + 3ivcoa_m -> m01597m + m02039m + 3hivac_m	Valine, leucine, and isoleucine metabolism	1000	1000	1
3HIVActe	Transport of 3-Hydroxy-Isovalerate, Extracellular	3hivac_c -> 3hivac_s	Transport reactions	1000	1000	1
3HIVActm	Transport of 3-Hydroxy-Isovalerate, Mitochondrial	3hivac_m -> 3hivac_c	Transport reactions	1000	1000	1
3HLVSTAChepNo1	conversion of 3-hydroxy-lovastatin lactone to acid form (No1)	m02040c + 3hlvst_c + 2.2011e-08 prot_Q15166 -> m02039c + 3hlvstacid_c	Drug metabolism	1000	1000	1
3HLVSTACtbc	release of 3-hydroxy-lovastatin acid form into bile	m01371c + m02040c + 3hlvstacid_c -> m01285c + m02039c + m02751c + 3hlvstacid_s	Drug metabolism	1000	1000	1
3HLVSTitr	3HLVSTitr	3hlvst_r -> 3hlvst_c	Drug metabolism	1000	1000	1
3HLVSTitr_REV	3HLVSTitr (reversible)	3hlvst_c -> 3hlvst_r	Drug metabolism	1000	1000	1
3HMPtd	Transport of 3-Hydroxy-2-Methylpropanoate, Diffusion	m00784c -> m00784s	Transport reactions	1000	1000	1
3HMPtd_REV	Transport of 3-Hydroxy-2-Methylpropanoate, Diffusion (reversible)	m00784s -> m00784c	Transport reactions	1000	1000	1
3HMPtm	Transport of 3-Hydroxy-Isobutyrate, Mitochondrial	m00784m -> m00784c	Transport reactions	714.329	1000	0.714614
3HPCOAHYDNo1	3-Hydroxyisobutyryl-Coenzyme A Hydrolase (No1)	m02040c + m00799c + 1.0443e-06 prot_Q6NVY1 -> m01597c + m02039c + m02142c	Beta-alanine metabolism	0	0	1
3HPPAsec	3-Hydroxyphenylpropionic Acid Secretion	3hppa_c -> 3hppa_s	Transport reactions	1000	1000	1
3HPPAup	3-Hydroxyphenylpropionic Acid Uptake	3hppa_s -> 3hppa_c	Transport reactions	1000	1000	1
3HPPD	3-Hydroxypropionate Dehydrogenase	m02552c + m02142c -> m02039c + m02553c + m00900c	Propanoate metabolism	1000	1000	1
3HPPD_REV	3-Hydroxypropionate Dehydrogenase (reversible)	m02039c + m02553c + m00900c -> m02552c + m02142c	Propanoate metabolism	1000	1000	1
3HPPNOHGLUCte	Transport of 3- (3-Hydroxy-Phenyl)Propionate Hydroxy Derivative Glucuronide into Urine	3hpppnohgluc_c -> 3hpppnohgluc_s	Transport reactions	1000	1000	1
3HPPNOHGLUCte_REV	Transport of 3- (3-Hydroxy-Phenyl)Propionate Hydroxy Derivative Glucuronide into Urine (reversible)	3hpppnohgluc_s -> 3hpppnohgluc_c	Transport reactions	1000	1000	1
3HPPPNOHGLUCc	Glucuronidation of 3- (3-Hydroxyphenyl)Propionate Hydroxy Derivative	m03109c + 3hpppnoh_c -> m02039c + m03106c + 3hpppnohgluc_c	Phenylalanine metabolism	1000	1000	1
3HPPPNOHc	Hydroxylation of 3- (3-Hydroxyphenyl)Propionate	m02039c + m02555c + m02630c + 3hpppn_c -> m02040c + m02554c + 3hpppnoh_c	Phenylalanine metabolism	1000	1000	1
3HPPt	Transpot of 3-Hydroxypropionate	m02142c -> m02142s	Transport reactions	1000	1000	1
3HPPt_REV	Transpot of 3-Hydroxypropionate (reversible)	m02142s -> m02142c	Transport reactions	1000	1000	1
3HPPtm	Transport of 3-Hydroxypropionate, Mitochondrial	m02142c -> m02142m	Transport reactions	1000	1000	1
3HPPtm_REV	Transport of 3-Hydroxypropionate, Mitochondrial (reversible)	m02142m -> m02142c	Transport reactions	1000	1000	1
3HPVSCOAhc	3HPVSCOAhc	m01371c + m01597c + 3hpvs_c -> m01334c + m02759c + 3hpvscoa_c	Drug metabolism	1000	1000	1
3HPVSCOAitm	3HPVSCOAitm	3hpvscoa_m -> 3hpvscoa_c	Drug metabolism	1000	1000	1
3HPVSCOAitm_REV	3HPVSCOAitm (reversible)	3hpvscoa_c -> 3hpvscoa_m	Drug metabolism	1000	1000	1
3HPVSCOAitx	3HPVSCOAitx	3hpvscoa_c -> 3hpvscoa_p	Drug metabolism	1000	1000	1
3HPVSCOAitx_REV	3HPVSCOAitx (reversible)	3hpvscoa_p -> 3hpvscoa_c	Drug metabolism	1000	1000	1
3HPVSTETCOAhcmNo1	beta oxidation of 3-S-hydroxy-pravastatin-CoA to tatranor-CoA derivative in hepatocytes, mitochondria (No1)	6.825e-06 prot_P49748 + pmet_3HPVSTETCOAhcm -> 2 m01261m + 2 m01803m + 2 m02039m + 2 m02553m + m02630m + 3hpvstetcoa_m	Drug metabolism	1000	1000	1
3HPVSTETCOAhcmNo2	beta oxidation of 3-S-hydroxy-pravastatin-CoA to tatranor-CoA derivative in hepatocytes, mitochondria (No2)	4.9017e-08 prot_P40939 + pmet_3HPVSTETCOAhcm -> 2 m01261m + 2 m01803m + 2 m02039m + 2 m02553m + m02630m + 3hpvstetcoa_m	Drug metabolism	714.329	1000	0.714614
3HPVSTETCOAhcmNo3	beta oxidation of 3-S-hydroxy-pravastatin-CoA to tatranor-CoA derivative in hepatocytes, mitochondria (No3)	1.8769e-05 prot_P55084 + pmet_3HPVSTETCOAhcm -> 2 m01261m + 2 m01803m + 2 m02039m + 2 m02553m + m02630m + 3hpvstetcoa_m	Drug metabolism	942.511	1000	0.942569
3HPVSTETCOAhcxNo1	beta oxidation of 3-S-hydroxy-pravastatin-CoA to tetranor-CoA in hepatocytes, peroxisomes (No1)	1.8769e-05 prot_P09110 + pmet_3HPVSTETCOAhcx -> 2 m01261p + 2 m02039p + 2 m02041p + 2 m02553p + 3hpvstetcoa_p	Drug metabolism	627.175	1000	0.627547
3HPVSTETCOAhcxNo2	beta oxidation of 3-S-hydroxy-pravastatin-CoA to tetranor-CoA in hepatocytes, peroxisomes (No2)	3.0575e-07 prot_Q08426 + pmet_3HPVSTETCOAhcx -> 2 m01261p + 2 m02039p + 2 m02041p + 2 m02553p + 3hpvstetcoa_p	Drug metabolism	766.998	1000	0.76723
3HPVSTETCOAhcxNo3	beta oxidation of 3-S-hydroxy-pravastatin-CoA to tetranor-CoA in hepatocytes, peroxisomes (No3)	6.6138e-11 prot_P51659 + pmet_3HPVSTETCOAhcx -> 2 m01261p + 2 m02039p + 2 m02041p + 2 m02553p + 3hpvstetcoa_p	Drug metabolism	777.012	1000	0.777234
3HPVSTETCOAhcxNo4	beta oxidation of 3-S-hydroxy-pravastatin-CoA to tetranor-CoA in hepatocytes, peroxisomes (No4)	8.0051e-05 prot_Q15067 + pmet_3HPVSTETCOAhcx -> 2 m01261p + 2 m02039p + 2 m02041p + 2 m02553p + 3hpvstetcoa_p	Drug metabolism	1000	1000	1
3HPVSTETCOAitm	3HPVSTETCOAitm	3hpvstetcoa_m -> 3hpvstetcoa_c	Drug metabolism	1000	1000	1
3HPVSTETCOAitm_REV	3HPVSTETCOAitm (reversible)	3hpvstetcoa_c -> 3hpvstetcoa_m	Drug metabolism	1000	1000	1
3HPVSTETCOAitx	3HPVSTETCOAitx	3hpvstetcoa_p -> 3hpvstetcoa_c	Drug metabolism	1000	1000	1
3HPVSTETCOAitx_REV	3HPVSTETCOAitx (reversible)	3hpvstetcoa_c -> 3hpvstetcoa_p	Drug metabolism	1000	1000	1
3HPVSTEThc	3HPVSTEThc	m02040c + 3hpvstetcoa_c -> m01597c + m02039c + 3hpvstet_c	Drug metabolism	1000	1000	1
3HPVSTETteb	efflux of 3-S-hydroxy-pravastatin-tetranor into bile	m01371c + m02040c + 3hpvstet_c -> m01285c + m02039c + m02751c + 3hpvstet_s	Drug metabolism	2000	1000	1.999
3HPVSTETtev	exit of 3-S-hydroxy-pravastatin-tetranor into hepatic vein	3hpvstet_c -> 3hpvstet_s	Drug metabolism	1000	1000	1
3HPVSTETtev_REV	exit of 3-S-hydroxy-pravastatin-tetranor into hepatic vein (reversible)	3hpvstet_s -> 3hpvstet_c	Drug metabolism	1000	1000	1
3HPVShcNo1	oxidation of pravastatin to 3-hydroxy pravastatin in hepatocytes (No1)	0.0022222 prot_P08684 + pmet_3HPVShc -> m02040r + m02554r + 3hpvs_r	Drug metabolism	1000	1000	1
3HPVShcNo2	oxidation of pravastatin to 3-hydroxy pravastatin in hepatocytes (No2)	0.0006065 prot_P78329 + pmet_3HPVShc -> m02040r + m02554r + 3hpvs_r	Drug metabolism	260.358	1000	0.261096
3HPVShcNo3	oxidation of pravastatin to 3-hydroxy pravastatin in hepatocytes (No3)	1.177e-05 prot_Q08477 + pmet_3HPVShc -> m02040r + m02554r + 3hpvs_r	Drug metabolism	1000	1000	1
3HPVSitr	3HPVSitr	3hpvs_r -> 3hpvs_c	Drug metabolism	1000	1000	1
3HPVSitr_REV	3HPVSitr (reversible)	3hpvs_c -> 3hpvs_r	Drug metabolism	1000	1000	1
3HPVSteb	efflux of 3-S-hydroxy-pravastatin into bile	m01371c + m02040c + 3hpvs_c -> m01285c + m02039c + m02751c + 3hpvs_s	Drug metabolism	3000	1000	2.998
3HPVStep	3-hydroxy pravastatin exit into portal blood	3hpvs_c -> 3hpvs_s	Drug metabolism	1000	1000	1
3HPVStep_REV	3-hydroxy pravastatin exit into portal blood (reversible)	3hpvs_s -> 3hpvs_c	Drug metabolism	1000	1000	1
3HPVSthc	uptake of 3-hydroxy pravastatin by hepatocytes	m02046c + 3hpvs_s -> m02046s + 3hpvs_c	Drug metabolism	1000	1000	1
3HPVSthc_REV	uptake of 3-hydroxy pravastatin by hepatocytes (reversible)	m02046s + 3hpvs_c -> m02046c + 3hpvs_s	Drug metabolism	1000	1000	1
3HSMVACIDhepNo1	conversion of 3-hydroxy simvastatin lactone to acid form (No1)	m02040c + 3hsmv_c + 2.2011e-08 prot_Q15166 -> m02039c + 3hsmvacid_c	Drug metabolism	1000	1000	1
3HSMVACIDteb	efflux of 3-hydroxy-simvastatin-acid form into bile	m01371c + m02040c + 3hsmvacid_c -> m01285c + m02039c + m02751c + 3hsmvacid_s	Drug metabolism	1000	1000	1
3HSMVhepNo1	acid catalyzed rearrangement of 6-beta-hydroxy-simvastatin to 3-hydroxy simvastatin (No1)	2.1701e-06 prot_P10635 + pmet_3HSMVhep -> 3hsmv_r	Drug metabolism	1000	1000	1
3HSMVhepNo2	acid catalyzed rearrangement of 6-beta-hydroxy-simvastatin to 3-hydroxy simvastatin (No2)	2.1701e-06 prot_P20815 + pmet_3HSMVhep -> 3hsmv_r	Drug metabolism	1000	1000	1
3HSMVhepNo3	acid catalyzed rearrangement of 6-beta-hydroxy-simvastatin to 3-hydroxy simvastatin (No3)	2.1701e-06 prot_P10632 + pmet_3HSMVhep -> 3hsmv_r	Drug metabolism	355.62	1000	0.356264
3HSMVhepNo4	acid catalyzed rearrangement of 6-beta-hydroxy-simvastatin to 3-hydroxy simvastatin (No4)	2.1701e-06 prot_P08684 + pmet_3HSMVhep -> 3hsmv_r	Drug metabolism	1000	1000	1
3HSMVitr	3HSMVitr	3hsmv_r -> 3hsmv_c	Drug metabolism	1000	1000	1
3HSMVitr_REV	3HSMVitr (reversible)	3hsmv_c -> 3hsmv_r	Drug metabolism	1000	1000	1
3ISPVShc	isomerization of pravastatin to 3-alpha-iso-pravastatin in hepatocytes	pvs_c -> 3ispvs_c	Drug metabolism	1000	1000	1
3ISPVSitr	3ISPVSitr	3ispvs_r -> 3ispvs_c	Drug metabolism	1000	1000	1
3ISPVSitr_REV	3ISPVSitr (reversible)	3ispvs_c -> 3ispvs_r	Drug metabolism	1000	1000	1
3ISPVSteb	efflux of 3-alpha-iso-pravastatin into bile	m01371c + m02040c + 3ispvs_c -> m01285c + m02039c + m02751c + 3ispvs_s	Drug metabolism	3000	1000	2.998
3ISPVStep	3-alpha-iso-pravastatin exit into portal blood	3ispvs_c -> 3ispvs_s	Drug metabolism	1000	1000	1
3ISPVStep_REV	3-alpha-iso-pravastatin exit into portal blood (reversible)	3ispvs_s -> 3ispvs_c	Drug metabolism	1000	1000	1
3ISPVSthc	uptake of 3-alpha-iso-pravastatin by hepatocytes	m02046c + 3ispvs_s -> m02046s + 3ispvs_c	Drug metabolism	1000	1000	1
3ISPVSthc_REV	uptake of 3-alpha-iso-pravastatin by hepatocytes (reversible)	m02046s + 3ispvs_c -> m02046c + 3ispvs_s	Drug metabolism	1000	1000	1
3ITYR_Lte	Transport of 3-Iodo-L-Tyrosine	m00807c + m02519s -> m02519c + m00807s	Transport reactions	1000	1000	1
3ITYR_Lte_REV	Transport of 3-Iodo-L-Tyrosine (reversible)	m02519c + m00807s -> m00807c + m02519s	Transport reactions	1000	1000	1
3IVCRNtr	Transport of 3-Hydroxy-Isovaleryl Carnitine	3ivcrn_s -> 3ivcrn_c	Transport reactions	1000	1000	1
3IVCRNtr_REV	Transport of 3-Hydroxy-Isovaleryl Carnitine (reversible)	3ivcrn_c -> 3ivcrn_s	Transport reactions	1000	1000	1
3MEACMPhc	formation of 3-methoxy-acetaminophen in hepatocytes	m02877c + 3ohacmp_c -> m02039c + m02871c + 3meacmp_c	Drug metabolism	1000	1000	1
3MEACMPitr	3MEACMPitr	3meacmp_c -> 3meacmp_r	Drug metabolism	1000	1000	1
3MEACMPitr_REV	3MEACMPitr (reversible)	3meacmp_r -> 3meacmp_c	Drug metabolism	1000	1000	1
3MGLUTACc	Formation of 3-Methyl-Glutaconate	m00827m + m02040m -> m01597m + m02039m + 3mglutac_m	Valine, leucine, and isoleucine metabolism	1000	1000	1
3MGLUTACte	Transport of 3-Methyl-Glutaconate, Extracellular	3mglutac_c -> 3mglutac_s	Transport reactions	1000	1000	1
3MGLUTACtm	Transport of 3-Methyl-Glutaconate, Mitochondrial	3mglutac_m -> 3mglutac_c	Transport reactions	1000	1000	1
3MGLUTRc	Formation of 3-Methyl-Glutarate	m02039c + m02555c + 3mglutac_c -> m02554c + 3mglutr_c	Valine, leucine, and isoleucine metabolism	1000	1000	1
3MGLUTRte	Transport of 3-Methyl-Glutarate	3mglutr_c -> 3mglutr_s	Transport reactions	1000	1000	1
3MHISc	Formation of Methyl-Histidine	m02125c + m02877c -> m02039c + m02871c + 3mhis_c	Histidine metabolism	1000	1000	1
3MHISc_REV	Formation of Methyl-Histidine (reversible)	m02039c + m02871c + 3mhis_c -> m02125c + m02877c	Histidine metabolism	1000	1000	1
3MHISt1	Transport of Methyl-Histidine by System N Transport	m02519c + 3mhis_c -> m02519s + 3mhis_s	Transport reactions	1000	1000	1
3MHISt1_REV	Transport of Methyl-Histidine by System N Transport (reversible)	m02519s + 3mhis_s -> m02519c + 3mhis_c	Transport reactions	1000	1000	1
3MHISt2	Transport of Methyl-Histidine by System L Transport (Lat1)	m02360c + 3mhis_s -> m02360s + 3mhis_c	Transport reactions	1000	1000	1
3MHISt2_REV	Transport of Methyl-Histidine by System L Transport (Lat1) (reversible)	m02360s + 3mhis_c -> m02360c + 3mhis_s	Transport reactions	1000	1000	1
3MHISt3	Transport of Methyl-Histidine by System L Transport (Lat2)	m02724c + 3mhis_s -> m02724s + 3mhis_c	Transport reactions	1000	1000	1
3MHISt3_REV	Transport of Methyl-Histidine by System L Transport (Lat2) (reversible)	m02724s + 3mhis_c -> m02724c + 3mhis_s	Transport reactions	1000	1000	1
3MOBt2im	3-Methyl-2-Oxobutanoate Mitochondrial Transport via Proton Symport	m00824c + m02039c -> m00824m + m02039m	Transport reactions	1000	1000	1
3MOBte	Transport of 3-Methyl-2-Oxobutanoate	m00824s -> m00824c	Transport reactions	1000	1000	1
3MOBte_REV	Transport of 3-Methyl-2-Oxobutanoate (reversible)	m00824c -> m00824s	Transport reactions	1000	1000	1
3MOPte	Transport of 3-Methyl-2-Oxopentanoate	m00669s -> m00669c	Transport reactions	1000	1000	1
3MOPte_REV	Transport of 3-Methyl-2-Oxopentanoate (reversible)	m00669c -> m00669s	Transport reactions	1000	1000	1
3MOX4HOXMte	Transport 3-Methoxy-4-Hydroxymandelate, Extracellular	m03136c -> m03136s	Transport reactions	1000	1000	1
3MOX4HOXMtm	Transport of 3-Methoxy-4-Hydroxymandelate, Mitochondrial	m03136m -> m03136c	Transport reactions	0	0	1
3MOXTYRESSte	3-Methoxytyramine Secretion via Secretory Vesicle (ATP Driven)	3 m00821c + 2 m01371c + 2 m02040c -> 2 m01285c + 2 m02039c + 2 m02751c + 3 m00821s	Transport reactions	666.667	666.667	1
3MOXTYRt	Transport of 3-Methoxytyramine, Diffusion	m00821c -> m00821s	Transport reactions	1000	1000	1
3MOXTYRt_REV	Transport of 3-Methoxytyramine, Diffusion (reversible)	m00821s -> m00821c	Transport reactions	1000	1000	1
3MTPte	Secretion of 3-Methyl-Thio-Propionate	3mtp_c -> 3mtp_s	Transport reactions	1000	1000	1
3NTD7lNo1	3'-Nucleotidase (AMP), Lysosomal (No1)	9.6117e-07 prot_P15309 + pmet_3NTD7l -> m01280l + m02751l	Purine metabolism	0	0	1
3NTD7lNo2	3'-Nucleotidase (AMP), Lysosomal (No2)	1.1574e-06 prot_P13686 + pmet_3NTD7l -> m01280l + m02751l	Purine metabolism	0	0	1
3NTD7lNo3	3'-Nucleotidase (AMP), Lysosomal (No3)	1.1574e-06 prot_P11117 + pmet_3NTD7l -> m01280l + m02751l	Purine metabolism	0	0	1
3NTD7lNo4	3'-Nucleotidase (AMP), Lysosomal (No4)	1.1574e-06 prot_Q9NPH0 + pmet_3NTD7l -> m01280l + m02751l	Purine metabolism	0	0	1
3OCTDEC2CRNtr	Transport of 3-Hydroxyoctadecadienoylcarnitine	3octdec2crn_s -> 3octdec2crn_c	Transport reactions	1000	1000	1
3OCTDEC2CRNtr_REV	Transport of 3-Hydroxyoctadecadienoylcarnitine (reversible)	3octdec2crn_c -> 3octdec2crn_s	Transport reactions	1000	1000	1
3OCTDECCRNtr	Transport of 3-Hydroxyoctadecanoyl Carnitine	3octdeccrn_s -> 3octdeccrn_c	Transport reactions	1000	1000	1
3OCTDECCRNtr_REV	Transport of 3-Hydroxyoctadecanoyl Carnitine (reversible)	3octdeccrn_c -> 3octdeccrn_s	Transport reactions	1000	1000	1
3OCTDECE1CRNtr	Transport of 3-Hydroxy-Octadecenoyl Carnitine	3octdece1crn_s -> 3octdece1crn_c	Transport reactions	1000	1000	1
3OCTDECE1CRNtr_REV	Transport of 3-Hydroxy-Octadecenoyl Carnitine (reversible)	3octdece1crn_c -> 3octdece1crn_s	Transport reactions	1000	1000	1
3OHACMPhrNo1	oxidation of acetaminophen to 3-OH-acetaminophen in hepatocytes (No1)	1.177e-05 prot_P05181 + pmet_3OHACMPhr -> m02040r + m02554r + 3ohacmp_r	Drug metabolism	1000	1000	1
3OHACMPhrNo2	oxidation of acetaminophen to 3-OH-acetaminophen in hepatocytes (No2)	1.177e-05 prot_P11509 + pmet_3OHACMPhr -> m02040r + m02554r + 3ohacmp_r	Drug metabolism	1000	1000	1
3OHACMPitr	3OHACMPitr	3ohacmp_c -> 3ohacmp_r	Drug metabolism	1000	1000	1
3OHACMPitr_REV	3OHACMPitr (reversible)	3ohacmp_r -> 3ohacmp_c	Drug metabolism	1000	1000	1
3OHACMPtev	efflux of 3-OH-acetaminophen into hepatic vein	m01371c + m02040c + 3ohacmp_c -> m01285c + m02039c + m02751c + 3ohacmp_s	Drug metabolism	1000	1000	1
3OHGLUTACOAT3t	Transport of 3-Hydroxy-Glutarate, Extracellular, Antiport	m01306s + 3ohglutac_c -> m01306c + 3ohglutac_s	Transport reactions	1000	1000	1
3OHGLUTACOAT3t_REV	Transport of 3-Hydroxy-Glutarate, Extracellular, Antiport (reversible)	m01306c + 3ohglutac_s -> m01306s + 3ohglutac_c	Transport reactions	1000	1000	1
3OHGLUTACm	Formation of 3-Hydroxy-Glutarate	m02040m + 3hglutcoa_m -> m01597m + m02039m + 3ohglutac_m	Lysine metabolism	1000	1000	1
3OHGLUTACte	Transport of 3-Hydroxy-Glutarate, Extracellular	3ohglutac_c -> 3ohglutac_s	Transport reactions	1000	1000	1
3OHGLUTACtm	Transport of 3-Hydroxy-Glutarate, Mitochondrial	3ohglutac_m -> 3ohglutac_c	Transport reactions	1000	1000	1
3OHSEBACte	Transport of 3-Hydroxy-Sebacic Acid, Extracellular	3ohsebac_c -> 3ohsebac_s	Transport reactions	1000	1000	1
3OHSEBACtxc	Transportof 3-Hydroxy-Sebacic Acid, Peroxisomal	3ohsebac_p -> 3ohsebac_c	Transport reactions	1000	1000	1
3OHSEBACx	Formation of 3-Hydroxy-Sebacic Acid	m02040p + 3ohsebcoa_p -> m01597p + m02039p + 3ohsebac_p	Fatty acid oxidation	1000	1000	1
3OHSEBCOAxNo1	Formation of 3-Hydroxy-Sebacoyl Coa (No1)	1.5288e-07 prot_Q08426 + 1.5288e-07 prot_Q15067 + pmet_3OHSEBCOAx -> m02041p + 3ohsebcoa_p	Fatty acid oxidation	766.998	1000	0.76723
3OHSEBCOAxNo2	Formation of 3-Hydroxy-Sebacoyl Coa (No2)	8.0051e-05 prot_Q15067 + 8.0051e-05 prot_Q13011 + pmet_3OHSEBCOAx -> m02041p + 3ohsebcoa_p	Fatty acid oxidation	1000	1000	1
3OHSUBACte	Transport of 3-Hydoxy-Suberic Acid, Extracellular	3ohsubac_c -> 3ohsubac_s	Transport reactions	1000	1000	1
3OHSUBACtxc	Transport of 3-Hydoxy-Suberic Acid, Peroxisomal	3ohsubac_p -> 3ohsubac_c	Transport reactions	1000	1000	1
3OHSUBACx	Formation of 3-Hydoxy-Suberic Acid	m02040p + 3ohsubcoa_p -> m01597p + m02039p + 3ohsubac_p	Fatty acid oxidation	1000	1000	1
3OHSUBCOAxNo1	Formation of 3-Hydoxy-Suberyl Coa (No1)	1.5288e-07 prot_Q08426 + 1.5288e-07 prot_Q15067 + pmet_3OHSUBCOAx -> m02041p + 3ohsubcoa_p	Fatty acid oxidation	766.998	1000	0.76723
3OHSUBCOAxNo2	Formation of 3-Hydoxy-Suberyl Coa (No2)	8.0051e-05 prot_Q15067 + 8.0051e-05 prot_Q13011 + pmet_3OHSUBCOAx -> m02041p + 3ohsubcoa_p	Fatty acid oxidation	1000	1000	1
3PGtr	Transport of 3-Phospho-D-Glycerate	m00913s -> m00913c	Transport reactions	1000	1000	1
3PGtr_REV	Transport of 3-Phospho-D-Glycerate (reversible)	m00913c -> m00913s	Transport reactions	1000	1000	1
3TDCRNtr	Transport of 3-Hydroxy-Tetradecanoyl Carnitine	3tdcrn_s -> 3tdcrn_c	Transport reactions	1000	1000	1
3TDCRNtr_REV	Transport of 3-Hydroxy-Tetradecanoyl Carnitine (reversible)	3tdcrn_c -> 3tdcrn_s	Transport reactions	1000	1000	1
3TETD7ECOACRNtr	Transport of 3-Hydroxy Tetradecenoyl-7-Carnitine	3tetd7ecoacrn_s -> 3tetd7ecoacrn_c	Transport reactions	1000	1000	1
3TETD7ECOACRNtr_REV	Transport of 3-Hydroxy Tetradecenoyl-7-Carnitine (reversible)	3tetd7ecoacrn_c -> 3tetd7ecoacrn_s	Transport reactions	1000	1000	1
3THEXDDCOACRNtr	Transport of 3-Hydroxy Trans7, 10-Hexadecadienoyl Carnitine	3thexddcoacrn_s -> 3thexddcoacrn_c	Transport reactions	1000	1000	1
3THEXDDCOACRNtr_REV	Transport of 3-Hydroxy Trans7, 10-Hexadecadienoyl Carnitine (reversible)	3thexddcoacrn_c -> 3thexddcoacrn_s	Transport reactions	1000	1000	1
3TTETDDCOACRNtr	Transport of 3-Hydroxy Trans5, 8Tetradecadienoyl Carnitine	3ttetddcoacrn_s -> 3ttetddcoacrn_c	Transport reactions	1000	1000	1
3TTETDDCOACRNtr_REV	Transport of 3-Hydroxy Trans5, 8Tetradecadienoyl Carnitine (reversible)	3ttetddcoacrn_c -> 3ttetddcoacrn_s	Transport reactions	1000	1000	1
3UIBtd	Transport of 3-Ureidoisobutyrate, Diffusion	m00922c -> m00922s	Transport reactions	1000	1000	1
3UIBtd_REV	Transport of 3-Ureidoisobutyrate, Diffusion (reversible)	m00922s -> m00922c	Transport reactions	1000	1000	1
4AABUTNt	Diffusion of 4-Acetamidobutanoate	m00952s -> m00952c	Transport reactions	1000	1000	1
4AABUTNt_REV	Diffusion of 4-Acetamidobutanoate (reversible)	m00952c -> m00952s	Transport reactions	1000	1000	1
4ABUTtcn	Transport of GABA	m00970c -> m00970n	Transport reactions	0	0	1
4BHGLZABCt	excretion of 4-beta-OH-gliclazide into bile	m01371c + m02040c + 4bhglz_c -> m01285c + m02039c + m02751c + 4bhglz_s	Drug metabolism	1000	1000	1
4BHGLZhr	oxidation of gliclazide to 4-beta-OH-gliclazide in hepatocytes	m02039r + m02555r + m02630r + glz_r -> m02040r + m02554r + 4bhglz_r	Drug metabolism	1000	1000	1
4BHGLZitr	4BHGLZitr	4bhglz_r -> 4bhglz_c	Drug metabolism	1000	1000	1
4BHGLZitr_REV	4BHGLZitr (reversible)	4bhglz_c -> 4bhglz_r	Drug metabolism	1000	1000	1
4BHGLZtev	excretion of 4-beta-OH-gliclazide into hepatic vein	4bhglz_c -> 4bhglz_s	Drug metabolism	1000	1000	1
4BHGLZtev_REV	excretion of 4-beta-OH-gliclazide into hepatic vein (reversible)	4bhglz_s -> 4bhglz_c	Drug metabolism	1000	1000	1
4GLU56DIHDINDt	Transport of 4-S-Glutathionyl-5, 6-Dihydroxyindoline	m01371c + m02040c + 4glu56dihdind_c -> m01285c + m02039c + m02751c + 4glu56dihdind_s	Transport reactions	1000	1000	1
4HATVACIDOXDhcNo1	oxidation of atorvastatin acid to 4-hydroxy-atorvastatin-acid in hepatocytes (No1)	0.00010808 prot_P20815 + pmet_4HATVACIDOXDhc -> m02040r + m02554r + 4hatvacid_r	Drug metabolism	1000	1000	1
4HATVACIDOXDhcNo2	oxidation of atorvastatin acid to 4-hydroxy-atorvastatin-acid in hepatocytes (No2)	0.00010808 prot_P10632 + pmet_4HATVACIDOXDhc -> m02040r + m02554r + 4hatvacid_r	Drug metabolism	355.62	1000	0.356264
4HATVACIDOXDhcNo3	oxidation of atorvastatin acid to 4-hydroxy-atorvastatin-acid in hepatocytes (No3)	0.0022222 prot_P08684 + pmet_4HATVACIDOXDhc -> m02040r + m02554r + 4hatvacid_r	Drug metabolism	1000	1000	1
4HATVACIDhcNo1	conversion of 4-hydroxy-atorvastatin-lactone to its acid form in hepatocytes (No1)	m02040c + 4hatvlac_c + 2.2011e-08 prot_Q15166 -> m02039c + 4hatvacid_c	Drug metabolism	2000	1000	1.999
4HATVACIDitr	4HATVACIDitr	4hatvacid_r -> 4hatvacid_c	Drug metabolism	1000	1000	1
4HATVACIDitr_REV	4HATVACIDitr (reversible)	4hatvacid_c -> 4hatvacid_r	Drug metabolism	1000	1000	1
4HATVACIDtebNo1	efflux of 4-hydroxy-atorvastatin-acid into bile (No1)	9.4162e-05 prot_Q92887 + pmet_4HATVACIDteb -> m01285c + m02039c + m02751c + 4hatvacid_s	Drug metabolism	3000	1000	2.998
4HATVACIDtebNo2	efflux of 4-hydroxy-atorvastatin-acid into bile (No2)	9.4162e-05 prot_P08183 + pmet_4HATVACIDteb -> m01285c + m02039c + m02751c + 4hatvacid_s	Drug metabolism	92.5865	1000	0.093493
4HATVACIDtep	efflux of 4-hydroxy-atorvastatin-acid into portal blood	4hatvacid_c -> 4hatvacid_s	Drug metabolism	1000	1000	1
4HATVACIDtep_REV	efflux of 4-hydroxy-atorvastatin-acid into portal blood (reversible)	4hatvacid_s -> 4hatvacid_c	Drug metabolism	1000	1000	1
4HATVACIDthc	uptake of 4-hydroxy-atorvastatin-acid into hepatocytes	m02046c + 4hatvacid_s -> m02046s + 4hatvacid_c	Drug metabolism	1000	1000	1
4HATVACIDthc_REV	uptake of 4-hydroxy-atorvastatin-acid into hepatocytes (reversible)	m02046s + 4hatvacid_c -> m02046c + 4hatvacid_s	Drug metabolism	1000	1000	1
4HATVLACOXDhcNo1	oxidation of atorvastatin lactone to 4-hydroxy-atorvastatin-lactone in hepatocytes (No1)	0.00010808 prot_P20815 + pmet_4HATVLACOXDhc -> m02040r + m02554r + 4hatvlac_r	Drug metabolism	1000	1000	1
4HATVLACOXDhcNo2	oxidation of atorvastatin lactone to 4-hydroxy-atorvastatin-lactone in hepatocytes (No2)	0.0022222 prot_P08684 + pmet_4HATVLACOXDhc -> m02040r + m02554r + 4hatvlac_r	Drug metabolism	1000	1000	1
4HATVLAChc	conversion of 4-hydroxy-atorvastatin-lactone to its acid form in hepatocytes	m01371c + 4hatvacid_c -> m01334c + m02759c + 4hatvlac_c	Drug metabolism	1000	1000	1
4HATVLACitr	4HATVLACitr	4hatvlac_r -> 4hatvlac_c	Drug metabolism	1000	1000	1
4HATVLACitr_REV	4HATVLACitr (reversible)	4hatvlac_c -> 4hatvlac_r	Drug metabolism	1000	1000	1
4HATVLACtebNo1	efflux of 4-hydroxy-atorvastatin-lactone into bile (No1)	9.4162e-05 prot_Q92887 + pmet_4HATVLACteb -> m01285c + m02039c + m02751c + 4hatvlac_s	Drug metabolism	3000	1000	2.998
4HATVLACtebNo2	efflux of 4-hydroxy-atorvastatin-lactone into bile (No2)	9.4162e-05 prot_P08183 + pmet_4HATVLACteb -> m01285c + m02039c + m02751c + 4hatvlac_s	Drug metabolism	92.5865	1000	0.093493
4HATVLACtep	efflux of 4-hydroxy-atorvastatin-lactone into portal blood	4hatvlac_c -> 4hatvlac_s	Drug metabolism	1000	1000	1
4HATVLACtep_REV	efflux of 4-hydroxy-atorvastatin-lactone into portal blood (reversible)	4hatvlac_s -> 4hatvlac_c	Drug metabolism	1000	1000	1
4HATVLACthc	uptake of 4-hydroxy-atorvastatin-lactone into hepatocytes	m02046c + 4hatvlac_s -> m02046s + 4hatvlac_c	Drug metabolism	1000	1000	1
4HATVLACthc_REV	uptake of 4-hydroxy-atorvastatin-lactone into hepatocytes (reversible)	m02046s + 4hatvlac_c -> m02046c + 4hatvlac_s	Drug metabolism	1000	1000	1
4HBZCOAFm	4-Hydroxybenzoyl Coenzyme A Formation	m01597m + m02040m + m02552m + m00982m -> m01261m + m02039m + m02553m + m00996m	Ubiquinone synthesis	1000	1000	1
4HBZFm	4-Hydroxybenzoate Formation	m02040m + m00996m -> m00995m + m01597m + m02039m	Ubiquinone synthesis	1000	1000	1
4HBZte	Transport of 4-Hydroxybenzoate, Extracellular Space	m00995c -> m00995s	Transport reactions	1000	1000	1
4HMDGLUCitr	4HMDGLUCitr	4hmdgluc_r -> 4hmdgluc_c	Drug metabolism	1000	1000	1
4HMDGLUCitr_REV	4HMDGLUCitr (reversible)	4hmdgluc_c -> 4hmdgluc_r	Drug metabolism	1000	1000	1
4HMDGLUCtev	efflux of 4-OH-midazolam-glucuronide into hepatic vein	4hmdgluc_c -> 4hmdgluc_s	Drug metabolism	1000	1000	1
4HMDGLUCtev_REV	efflux of 4-OH-midazolam-glucuronide into hepatic vein (reversible)	4hmdgluc_s -> 4hmdgluc_c	Drug metabolism	1000	1000	1
4HMDZGLUChrNo1	glucuronidation of 4-OH-midazolam in enterocytes (No1)	5.0875e-08 prot_P06133 + pmet_4HMDZGLUChr -> m02039r + m03106r + 4hmdgluc_r	Drug metabolism	1000	1000	1
4HMDZGLUChrNo2	glucuronidation of 4-OH-midazolam in enterocytes (No2)	5.0875e-08 prot_P16662 + pmet_4HMDZGLUChr -> m02039r + m03106r + 4hmdgluc_r	Drug metabolism	1000	1000	1
4HMDZGLUChrNo3	glucuronidation of 4-OH-midazolam in enterocytes (No3)	5.0875e-08 prot_P22310 + pmet_4HMDZGLUChr -> m02039r + m03106r + 4hmdgluc_r	Drug metabolism	1000	1000	1
4HPROLTASCT1	Transport of Hydroxy-Proline	m01307s + m02519s + m03037c -> m01307c + m02519c + m03037s	Transport reactions	318.925	1000	0.319606
4HPRO_LTte	Transport of Trans-4-Hydroxy-L-Proline	m03037s -> m03037m	Transport reactions	1000	1000	1
4HPRO_LTte_REV	Transport of Trans-4-Hydroxy-L-Proline (reversible)	m03037m -> m03037s	Transport reactions	1000	1000	1
4MOPte	Transport of 4-Methyl-2-Oxopentanoate	m01013s -> m01013c	Transport reactions	1000	1000	1
4MOPte_REV	Transport of 4-Methyl-2-Oxopentanoate (reversible)	m01013c -> m01013s	Transport reactions	1000	1000	1
4MPTNLtr	4-Methylpentanal Transport, Endoplasmatic Reticulum	m02182c -> m02182r	Transport reactions	1000	1000	1
4MPTNLtr_REV	4-Methylpentanal Transport, Endoplasmatic Reticulum (reversible)	m02182r -> m02182c	Transport reactions	1000	1000	1
4OHBUTm	Formation of 4-Hydroxy-Butyrate	m02039m + m02553m + m02942m -> m02552m + 4ohbut_m	Alanine, aspartate and glutamate metabolism	1000	1000	1
4OHBUTtce	Transport of 4-Hydroxy-Butyrate, Extracellular	4ohbut_c -> 4ohbut_s	Transport reactions	1000	1000	1
4OHBUTtmc	Transport of 4-Hydroxy-Butyrate, Mitochondrial	4ohbut_m -> 4ohbut_c	Transport reactions	1000	1000	1
4OHMDZhrNo1	oxidation of midazolam to 4-OH-midazolam in hepatocytes (No1)	0.00010808 prot_P20815 + pmet_4OHMDZhr -> m02040r + m02554r + 4ohmdz_r	Drug metabolism	1000	1000	1
4OHMDZhrNo2	oxidation of midazolam to 4-OH-midazolam in hepatocytes (No2)	0.0022222 prot_P08684 + pmet_4OHMDZhr -> m02040r + m02554r + 4ohmdz_r	Drug metabolism	1000	1000	1
4OHMDZitr	4OHMDZitr	4ohmdz_r -> 4ohmdz_c	Drug metabolism	1000	1000	1
4OHMDZitr_REV	4OHMDZitr (reversible)	4ohmdz_c -> 4ohmdz_r	Drug metabolism	1000	1000	1
4OHMDZtev	efflux of 4-OH-midazolam into hepatic vein	4ohmdz_c -> 4ohmdz_s	Drug metabolism	1000	1000	1
4OHMDZtev_REV	efflux of 4-OH-midazolam into hepatic vein (reversible)	4ohmdz_s -> 4ohmdz_c	Drug metabolism	1000	1000	1
4OHPROIMINOtc	Transport of L-Oh-Proline by the Apical Imino Amino Acid Transporters in Kidney And Intestine	m01442s + 2 m02519s + m03037s -> m01442c + 2 m02519c + m03037c	Transport reactions	1318.93	1000	1.31861
4TMEABUTNt1	Transport of 4- (Trimethylammonio)Butanoate, Sodium Symport	m01922c + m02519c -> m02519s + m01922s	Transport reactions	1000	1000	1
4TMEABUTNt1_REV	Transport of 4- (Trimethylammonio)Butanoate, Sodium Symport (reversible)	m02519s + m01922s -> m01922c + m02519c	Transport reactions	1000	1000	1
4TMEABUTNt2	Transport of 4- (Trimethylammonio)Butanoate, Proton Symport	m01922c + m02039c -> m02039s + m01922s	Transport reactions	1000	1000	1
4TMEABUTNt2_REV	Transport of 4- (Trimethylammonio)Butanoate, Proton Symport (reversible)	m02039s + m01922s -> m01922c + m02039c	Transport reactions	1000	1000	1
56DHPVShcNo1	oxidation of triol metabolite to 3-keto-5,6,-dihydroxy-pravastatin in hepatocytes (No1)	m02039r + m02555r + m02630r + tripvs_r + 0.0022222 prot_P08684 -> 2 m02040r + m02554r + 56dhpvs_r	Drug metabolism	1000	1000	1
56DHPVSitr	56DHPVSitr	56dhpvs_r -> 56dhpvs_c	Drug metabolism	1000	1000	1
56DHPVSitr_REV	56DHPVSitr (reversible)	56dhpvs_c -> 56dhpvs_r	Drug metabolism	1000	1000	1
56DHPVSteb	efflux of 3-keto-5,6,-dihydroxy-pravastatin into bile	m01371c + m02040c + 56dhpvs_c -> m01285c + m02039c + m02751c + 56dhpvs_s	Drug metabolism	2000	1000	1.999
56DHPVStev	exit of 3-keto-5,6,-dihydroxy-pravastatin into hepatic vein	56dhpvs_c -> 56dhpvs_s	Drug metabolism	1000	1000	1
56DHPVStev_REV	exit of 3-keto-5,6,-dihydroxy-pravastatin into hepatic vein (reversible)	56dhpvs_s -> 56dhpvs_c	Drug metabolism	1000	1000	1
56DTHMt	Transport of 5, 6-Dihydrothymine, Sodium Symport	m01705c + m02519c -> m02519s + m01705s	Transport reactions	1000	1000	1
56DTHMt_REV	Transport of 5, 6-Dihydrothymine, Sodium Symport (reversible)	m02519s + m01705s -> m01705c + m02519c	Transport reactions	1000	1000	1
56DTHMtd	Transport of 5, 6-Dihydrothymine, Diffusion	m01705c -> m01705s	Transport reactions	1000	1000	1
56DTHMtd_REV	Transport of 5, 6-Dihydrothymine, Diffusion (reversible)	m01705s -> m01705c	Transport reactions	1000	1000	1
56DURAt	Transport of 5, 6-Dihydrouracil, Sodium Symport	m01052c + m02519c -> m02519s + m01052s	Transport reactions	1000	1000	1
56DURAt_REV	Transport of 5, 6-Dihydrouracil, Sodium Symport (reversible)	m02519s + m01052s -> m01052c + m02519c	Transport reactions	1000	1000	1
56DURAtd	Transport of 5, 6-Dihydrouracil, Diffusion	m01052c -> m01052s	Transport reactions	1000	1000	1
56DURAtd_REV	Transport of 5, 6-Dihydrouracil, Diffusion (reversible)	m01052s -> m01052c	Transport reactions	1000	1000	1
56EPPVShcNo1	oxidation of 3-alpha-iso-pravastatin to 5,6-epoxy-3-alpha-iso-pravastatin in hepatocytes (No1)	m02039r + m02555r + m02630r + 3ispvs_r + 0.0022222 prot_P08684 -> m02040r + m02554r + 56eppvs_r	Drug metabolism	1000	1000	1
56EPPVSitr	56EPPVSitr	56eppvs_r -> 56eppvs_c	Drug metabolism	1000	1000	1
56EPPVSitr_REV	56EPPVSitr (reversible)	56eppvs_c -> 56eppvs_r	Drug metabolism	1000	1000	1
56EPPVSteb	efflux of 5,6-epoxy-3-alpha-iso-pravastatin into bile	m01371c + m02040c + 56eppvs_c -> m01285c + m02039c + m02751c + 56eppvs_s	Drug metabolism	2000	1000	1.999
56EPPVStev	exit of 5,6-epoxy-3-alpha-iso-pravastatin into hepatic vein	56eppvs_c -> 56eppvs_s	Drug metabolism	1000	1000	1
56EPPVStev_REV	exit of 5,6-epoxy-3-alpha-iso-pravastatin into hepatic vein (reversible)	56eppvs_s -> 56eppvs_c	Drug metabolism	1000	1000	1
5A2OPNTNte	Transport of 5-Amino-2-Oxopentanoic Acid, Extracellular	m01073c -> m01073s	Transport reactions	1000	1000	1
5A2OPNTNte_REV	Transport of 5-Amino-2-Oxopentanoic Acid, Extracellular (reversible)	m01073s -> m01073c	Transport reactions	1000	1000	1
5A2OPNTNtx	Transport of 5-Amino-2-Oxopentanoic Acid, Peroxisome	m01073p -> m01073c	Transport reactions	1000	1000	1
5A2OPNTNtx_REV	Transport of 5-Amino-2-Oxopentanoic Acid, Peroxisome (reversible)	m01073c -> m01073p	Transport reactions	1000	1000	1
5AOPt	Transport of 5-Amino-4-Oxopentanoate, Proton Symport	m01074c + 2 m02039c -> 2 m02039s + m01074s	Transport reactions	1000	1000	1
5AOPt2	5-Aminolevulinate Transport in via Proton Symport	m02039s + m01074s -> m01074c + m02039c	Transport reactions	1000	1000	1
5AOPt_REV	Transport of 5-Amino-4-Oxopentanoate, Proton Symport (reversible)	2 m02039s + m01074s -> m01074c + 2 m02039c	Transport reactions	1000	1000	1
5CYSDOPAt	Transport of 5-S-Cysteinyldopamine	5cysdopa_c -> 5cysdopa_s	Transport reactions	1000	1000	1
5CYSDOPAt_REV	Transport of 5-S-Cysteinyldopamine (reversible)	5cysdopa_s -> 5cysdopa_c	Transport reactions	1000	1000	1
5EIPENCmNo1	Hydrolysis of 5, 8, 11, 14, 17-Eicosapentenoylcoa to 5, 8, 11, 14, 17-Eicosapentenoic Acid (No1)	1.5964e-07 prot_O00154 + pmet_5EIPENCm -> m01597m + m02039m + 5eipenc_m	Fatty acid oxidation	260.358	1000	0.261096
5EIPENCmNo2	Hydrolysis of 5, 8, 11, 14, 17-Eicosapentenoylcoa to 5, 8, 11, 14, 17-Eicosapentenoic Acid (No2)	1.5964e-07 prot_O14734 + pmet_5EIPENCm -> m01597m + m02039m + 5eipenc_m	Fatty acid oxidation	260.358	1000	0.261096
5EIPENCmNo3	Hydrolysis of 5, 8, 11, 14, 17-Eicosapentenoylcoa to 5, 8, 11, 14, 17-Eicosapentenoic Acid (No3)	1.5964e-07 prot_Q9NPJ3 + pmet_5EIPENCm -> m01597m + m02039m + 5eipenc_m	Fatty acid oxidation	260.358	1000	0.261096
5EIPENCmNo4	Hydrolysis of 5, 8, 11, 14, 17-Eicosapentenoylcoa to 5, 8, 11, 14, 17-Eicosapentenoic Acid (No4)	1.5964e-07 prot_P49753 + pmet_5EIPENCm -> m01597m + m02039m + 5eipenc_m	Fatty acid oxidation	260.358	1000	0.261096
5EIPENCte	Transport of 5, 8, 11, 14, 17-Eicosapentenoic Acid, Extracellular Space	m01371c + m02040c + 5eipenc_c -> m01285c + m02039c + m02751c + 5eipenc_s	Transport reactions	260.358	1000	0.261096
5EIPENCtm	Transport of 5, 8, 11, 14, 17-Eicosapentenoic Acid, Mitochondrial	5eipenc_m + m02039i -> m02039m + 5eipenc_c	Transport reactions	260.358	1000	0.261096
5FTHFt2	5-Formyltetrahydrofolate Transport via Anion Exchange	m01100s + m02040c -> m01100c + m02040s	Transport reactions	551.442	1000	0.55189
5FTHFt2_REV	5-Formyltetrahydrofolate Transport via Anion Exchange (reversible)	m01100c + m02040s -> m01100s + m02040c	Transport reactions	551.442	1000	0.55189
5G2OXPTte	Transport of 5-Guanidino-2-Oxopentanoic Acid, Extracellular	m01101c -> m01101s	Transport reactions	1000	1000	1
5G2OXPTte_REV	Transport of 5-Guanidino-2-Oxopentanoic Acid, Extracellular (reversible)	m01101s -> m01101c	Transport reactions	1000	1000	1
5G2OXPTtx	Transport of 5-Guanidino-2-Oxopentanoic Acid, Peroxisomal	m01101p -> m01101c	Transport reactions	1000	1000	1
5G2OXPTtx_REV	Transport of 5-Guanidino-2-Oxopentanoic Acid, Peroxisomal (reversible)	m01101c -> m01101p	Transport reactions	1000	1000	1
5HOXINDACTOXmNo1	5-Hydroxyindoleacetaldehyde:NAD+ Oxidoreductase, Mitochondrial (No1)	7.9365e-05 prot_P05091 + pmet_5HOXINDACTOXm -> 2 m02039m + m02553m + m01103m	Tryptophan metabolism	0	0	1
5HOXINDACTOXmNo2	5-Hydroxyindoleacetaldehyde:NAD+ Oxidoreductase, Mitochondrial (No2)	7.9365e-05 prot_P30837 + pmet_5HOXINDACTOXm -> 2 m02039m + m02553m + m01103m	Tryptophan metabolism	0	0	1
5HOXINDACTOXmNo3	5-Hydroxyindoleacetaldehyde:NAD+ Oxidoreductase, Mitochondrial (No3)	1.3959e-06 prot_P30038 + pmet_5HOXINDACTOXm -> 2 m02039m + m02553m + m01103m	Tryptophan metabolism	0	0	1
5HOXINDOAtr	Transport of 5-Hydroxyindoleacetate	m02946c + m01103s -> m01103c + m02946s	Transport reactions	1000	1000	1
5HOXINDOAtr_REV	Transport of 5-Hydroxyindoleacetate (reversible)	m01103c + m02946s -> m02946c + m01103s	Transport reactions	1000	1000	1
5HPETATP	Transport of 5(S)-HPETE, Active Transport	m01042c + m01371c + m02040c -> m01285c + m02039c + m02751c + m01042s	Transport reactions	1000	1000	1
5HPETtd	Transport of 5(S)-HPETE, Diffusion	m01042c -> m01042s	Transport reactions	1000	1000	1
5HPETtd_REV	Transport of 5(S)-HPETE, Diffusion (reversible)	m01042s -> m01042c	Transport reactions	1000	1000	1
5HTRPVESSEC	5-Hydroxy-L-Tryptophan Secretion via Secretory Vesicle (ATP Driven)	m01107c + m01371c + m02040c -> m01107s + m01285c + m02039c + m02751c	Transport reactions	1000	1000	1
5MTAte	Transport of 5-S-Methyl-5-Thioadenosine	m01116s -> m01116c	Transport reactions	1000	1000	1
5MTAte_REV	Transport of 5-S-Methyl-5-Thioadenosine (reversible)	m01116c -> m01116s	Transport reactions	1000	1000	1
5MTHFt2	5-Methyltetrahydrofolate Transport via Anion Exchange	m01115s + m02040c -> m01115c + m02040s	Transport reactions	551.442	1000	0.55189
5MTHFt2_REV	5-Methyltetrahydrofolate Transport via Anion Exchange (reversible)	m01115c + m02040s -> m01115s + m02040c	Transport reactions	551.442	1000	0.55189
5OHFVSGLUhc	glucuronidation of 5-hydroxy-fluvastatin	m03109r + 5ohfvs_r -> m02039r + m03106r + 5ohfvsglu_r	Drug metabolism	1000	1000	1
5OHFVSGLUitr	5OHFVSGLUitr	5ohfvsglu_c -> 5ohfvsglu_r	Drug metabolism	1000	1000	1
5OHFVSGLUitr_REV	5OHFVSGLUitr (reversible)	5ohfvsglu_r -> 5ohfvsglu_c	Drug metabolism	1000	1000	1
5OHFVSGLUtev	exit of 5-hydroxy-fluvastatin-glucuronide into hepatic vein for excretion in urine	5ohfvsglu_c -> 5ohfvsglu_s	Drug metabolism	1000	1000	1
5OHFVSGLUtev_REV	exit of 5-hydroxy-fluvastatin-glucuronide into hepatic vein for excretion in urine (reversible)	5ohfvsglu_s -> 5ohfvsglu_c	Drug metabolism	1000	1000	1
5OHFVShcNo1	oxidation of fluvastatin to 5-hydroxy-fluvastatin in hepatocytes (No1)	0.00010808 prot_P10635 + pmet_5OHFVShc -> m02040r + m02554r + 5ohfvs_r	Drug metabolism	1947.9	1000	1.94695
5OHFVShcNo2	oxidation of fluvastatin to 5-hydroxy-fluvastatin in hepatocytes (No2)	1.177e-05 prot_P11712 + pmet_5OHFVShc -> m02040r + m02554r + 5ohfvs_r	Drug metabolism	76.5441	1000	0.0774666
5OHFVShcNo3	oxidation of fluvastatin to 5-hydroxy-fluvastatin in hepatocytes (No3)	0.00010808 prot_P10632 + pmet_5OHFVShc -> m02040r + m02554r + 5ohfvs_r	Drug metabolism	355.62	1000	0.356264
5OHFVShcNo4	oxidation of fluvastatin to 5-hydroxy-fluvastatin in hepatocytes (No4)	0.0022222 prot_P08684 + pmet_5OHFVShc -> m02040r + m02554r + 5ohfvs_r	Drug metabolism	1748.2	1000	1.74746
5OHFVSitr	5OHFVSitr	5ohfvs_r -> 5ohfvs_c	Drug metabolism	1000	1000	1
5OHFVSitr_REV	5OHFVSitr (reversible)	5ohfvs_c -> 5ohfvs_r	Drug metabolism	1000	1000	1
5OHFVSteb	efflux of 5-hydroxy-fluvastatin into bile for excretion into faeces	m01371c + m02040c + 5ohfvs_c -> m01285c + m02039c + m02751c + 5ohfvs_s	Drug metabolism	1000	1000	1
5OHHEXAc	Formation of 5-Hydroxy-Hexanoate	m02039c + m02120c + m02555c + m02630c -> m02040c + m02554c + 5ohhexa_c	Fatty acid oxidation	1000	1000	1
5OHHEXAte	Transport of 5-Hydroxy-Hexanoate, Extracellular	5ohhexa_c -> 5ohhexa_s	Transport reactions	1000	1000	1
5OXPROt	Transport of 5-Oxoprolinate	2 m02519s + m01127s -> m01127c + 2 m02519c	Transport reactions	1000	1000	1
5OXPROt_REV	Transport of 5-Oxoprolinate (reversible)	m01127c + 2 m02519c -> 2 m02519s + m01127s	Transport reactions	1000	1000	1
6AHGLZABCt	excretion of 6-alpha-OH-gliclazide into bile	m01371c + m02040c + 6ahglz_c -> m01285c + m02039c + m02751c + 6ahglz_s	Drug metabolism	1000	1000	1
6AHGLZhr	oxidation of gliclazide to 6-alpha-OH-gliclazide in hepatocytes	m02039r + m02555r + m02630r + glz_r -> m02040r + m02554r + 6ahglz_r	Drug metabolism	1000	1000	1
6AHGLZitr	6AHGLZitr	6ahglz_r -> 6ahglz_c	Drug metabolism	1000	1000	1
6AHGLZitr_REV	6AHGLZitr (reversible)	6ahglz_c -> 6ahglz_r	Drug metabolism	1000	1000	1
6AHGLZtev	excretion of 6-alpha-OH-gliclazide into hepatic vein	6ahglz_c -> 6ahglz_s	Drug metabolism	1000	1000	1
6AHGLZtev_REV	excretion of 6-alpha-OH-gliclazide into hepatic vein (reversible)	6ahglz_s -> 6ahglz_c	Drug metabolism	1000	1000	1
6BHGLZABCt	excretion of 6-beta-OH-gliclazide into bile	m01371c + m02040c + 6bhglz_c -> m01285c + m02039c + m02751c + 6bhglz_s	Drug metabolism	1000	1000	1
6BHGLZGLCABCt	excretion of 6-beta-OH-gliclazide-glucuronide into bile	m01371c + m02040c + 6bhglzglc_c -> m01285c + m02039c + m02751c + 6bhglzglc_s	Drug metabolism	1000	1000	1
6BHGLZGLChr	glucuronidation of 6-beta-OH-gliclazide-glucuronide in hepatocytes	m03109r + 6bhglz_r -> m02039r + m03106r + 6bhglzglc_r	Drug metabolism	1000	1000	1
6BHGLZGLCitr	6BHGLZGLCitr	6bhglzglc_r -> 6bhglzglc_c	Drug metabolism	1000	1000	1
6BHGLZGLCitr_REV	6BHGLZGLCitr (reversible)	6bhglzglc_c -> 6bhglzglc_r	Drug metabolism	1000	1000	1
6BHGLZGLCtev	excretion of 6-beta-OH-gliclazide-glucuronide into hepatic vein	6bhglzglc_c -> 6bhglzglc_s	Drug metabolism	1000	1000	1
6BHGLZGLCtev_REV	excretion of 6-beta-OH-gliclazide-glucuronide into hepatic vein (reversible)	6bhglzglc_s -> 6bhglzglc_c	Drug metabolism	1000	1000	1
6BHGLZhrNo1	oxidation of gliclazide to 6-beta-OH-gliclazide in hepatocytes (No1)	0.00010808 prot_P10635 + pmet_6BHGLZhr -> m02040r + m02554r + 6bhglz_r	Drug metabolism	1000	1000	1
6BHGLZhrNo2	oxidation of gliclazide to 6-beta-OH-gliclazide in hepatocytes (No2)	1.177e-05 prot_P11712 + pmet_6BHGLZhr -> m02040r + m02554r + 6bhglz_r	Drug metabolism	76.5441	1000	0.0774666
6BHGLZhrNo3	oxidation of gliclazide to 6-beta-OH-gliclazide in hepatocytes (No3)	0.00010808 prot_P10632 + pmet_6BHGLZhr -> m02040r + m02554r + 6bhglz_r	Drug metabolism	355.62	1000	0.356264
6BHGLZhrNo4	oxidation of gliclazide to 6-beta-OH-gliclazide in hepatocytes (No4)	1.177e-05 prot_P33261 + pmet_6BHGLZhr -> m02040r + m02554r + 6bhglz_r	Drug metabolism	34.0479	1000	0.0350129
6BHGLZitr	6BHGLZitr	6bhglz_r -> 6bhglz_c	Drug metabolism	1000	1000	1
6BHGLZitr_REV	6BHGLZitr (reversible)	6bhglz_c -> 6bhglz_r	Drug metabolism	1000	1000	1
6BHGLZtev	excretion of 6-beta-OH-gliclazide into hepatic vein	6bhglz_c -> 6bhglz_s	Drug metabolism	1000	1000	1
6BHGLZtev_REV	excretion of 6-beta-OH-gliclazide into hepatic vein (reversible)	6bhglz_s -> 6bhglz_c	Drug metabolism	1000	1000	1
6CSMVACIDhepNo1	conversion of 6-beta-carboxy simvastatin lactone to acid form (No1)	m02040c + 6csmv_c + 2.2011e-08 prot_Q15166 -> m02039c + 6csmvacid_c	Drug metabolism	779.159	1000	0.779379
6CSMVACIDteb	efflux of 6-beta-carboxy-simvastatin-acid form into bile	m01371c + m02040c + 6csmvacid_c -> m01285c + m02039c + m02751c + 6csmvacid_s	Drug metabolism	779.159	1000	0.779379
6CSMVhepNo1	oxidation of 6-exomethylene simvastatin to 6-beta-hydroxy carboxy simvastatin lactone form (No1)	0.00010808 prot_P10635 + pmet_6CSMVhep -> m02041r + m02554r + 6csmv_r	Drug metabolism	779.159	1000	0.779379
6CSMVhepNo2	oxidation of 6-exomethylene simvastatin to 6-beta-hydroxy carboxy simvastatin lactone form (No2)	0.00010808 prot_P20815 + pmet_6CSMVhep -> m02041r + m02554r + 6csmv_r	Drug metabolism	779.159	1000	0.779379
6CSMVhepNo3	oxidation of 6-exomethylene simvastatin to 6-beta-hydroxy carboxy simvastatin lactone form (No3)	0.00010808 prot_P10632 + pmet_6CSMVhep -> m02041r + m02554r + 6csmv_r	Drug metabolism	355.62	1000	0.356264
6CSMVhepNo4	oxidation of 6-exomethylene simvastatin to 6-beta-hydroxy carboxy simvastatin lactone form (No4)	0.0022222 prot_P08684 + pmet_6CSMVhep -> m02041r + m02554r + 6csmv_r	Drug metabolism	779.159	1000	0.779379
6CSMVitr	6CSMVitr	6csmv_c -> 6csmv_r	Drug metabolism	1000	1000	1
6CSMVitr_REV	6CSMVitr (reversible)	6csmv_r -> 6csmv_c	Drug metabolism	1000	1000	1
6EPSteb	efflux of 6-epipravastatin into bile	m01371c + m02040c + 6epvs_c -> m01285c + m02039c + m02751c + 6epvs_s	Drug metabolism	3000	1000	2.998
6EPVShc	isomerization of pravastatin to 6-epi-pravastatin in hepatocytes	pvs_c -> 6epvs_c	Drug metabolism	1000	1000	1
6EPVStep	6-epi-pravastatin exit into portal blood	6epvs_c -> 6epvs_s	Drug metabolism	1000	1000	1
6EPVStep_REV	6-epi-pravastatin exit into portal blood (reversible)	6epvs_s -> 6epvs_c	Drug metabolism	1000	1000	1
6EPVSthc	uptake of 6-epi-pravastatin by hepatocytes	m02046c + 6epvs_s -> m02046s + 6epvs_c	Drug metabolism	1000	1000	1
6EPVSthc_REV	uptake of 6-epi-pravastatin by hepatocytes (reversible)	m02046s + 6epvs_c -> m02046c + 6epvs_s	Drug metabolism	1000	1000	1
6HLVSTACIDitr	6HLVSTACIDitr	6hlvstacid_r -> 6hlvstacid_c	Drug metabolism	1000	1000	1
6HLVSTACIDitr_REV	6HLVSTACIDitr (reversible)	6hlvstacid_c -> 6hlvstacid_r	Drug metabolism	1000	1000	1
6HLVSTAChepNo1	conversion of lactone form of 6-beta-hydroxy-lovastatin to acid form (No1)	m02040c + 6hlvst_c + 2.2011e-08 prot_Q15166 -> m02039c + 6hlvstacid_c	Drug metabolism	92.5865	1000	0.093493
6HLVSTitr	6HLVSTitr	6hlvst_r -> 6hlvst_c	Drug metabolism	1000	1000	1
6HLVSTitr_REV	6HLVSTitr (reversible)	6hlvst_c -> 6hlvst_r	Drug metabolism	1000	1000	1
6HLVSTthep	uptake of 6-beta-hydroxy-lovastatin by hepatocytes	6hlvst_s -> 6hlvst_c	Drug metabolism	1000	1000	1
6HLVSTthep_REV	uptake of 6-beta-hydroxy-lovastatin by hepatocytes (reversible)	6hlvst_c -> 6hlvst_s	Drug metabolism	1000	1000	1
6HMSMVACIDhepNo1	conversion of 6-beta-hydroxy-methyl simvastatin lactone to acid form (No1)	m02040c + 6hmsmv_c + 2.2011e-08 prot_Q15166 -> m02039c + 6hmsmvacid_c	Drug metabolism	1000	1000	1
6HMSMVACIDteb	efflux of 6-beta-hydroxy-methyl-simvastatin-acid into bile	m01371c + m02040c + 6hmsmvacid_c -> m01285c + m02039c + m02751c + 6hmsmvacid_s	Drug metabolism	1000	1000	1
6HMSMVhepNo1	oxidation of 6-exomethylene simvastatin to 6-beta-hydroxy methyl simvastatin (No1)	0.00010808 prot_P10635 + pmet_6HMSMVhep -> m02041r + m02554r + 6hmsmv_r	Drug metabolism	1000	1000	1
6HMSMVhepNo2	oxidation of 6-exomethylene simvastatin to 6-beta-hydroxy methyl simvastatin (No2)	0.00010808 prot_P20815 + pmet_6HMSMVhep -> m02041r + m02554r + 6hmsmv_r	Drug metabolism	1000	1000	1
6HMSMVhepNo3	oxidation of 6-exomethylene simvastatin to 6-beta-hydroxy methyl simvastatin (No3)	0.00010808 prot_P10632 + pmet_6HMSMVhep -> m02041r + m02554r + 6hmsmv_r	Drug metabolism	355.62	1000	0.356264
6HMSMVhepNo4	oxidation of 6-exomethylene simvastatin to 6-beta-hydroxy methyl simvastatin (No4)	0.0022222 prot_P08684 + pmet_6HMSMVhep -> m02041r + m02554r + 6hmsmv_r	Drug metabolism	1000	1000	1
6HMSMVitr	6HMSMVitr	6hmsmv_c -> 6hmsmv_r	Drug metabolism	1000	1000	1
6HMSMVitr_REV	6HMSMVitr (reversible)	6hmsmv_r -> 6hmsmv_c	Drug metabolism	1000	1000	1
6HOXMELATNte	6-Hydroxymelatonin Diffusion, Cytosol	m01161c -> m01161s	Transport reactions	71.5892	1000	0.0725167
6HSMVACIDhepNo1	conversion of 6-beta-hydroxy simvastatin lactone to acid form (No1)	m02040c + 6hsmv_c + 2.2011e-08 prot_Q15166 -> m02039c + 6hsmvacid_c	Drug metabolism	1000	1000	1
6HSMVACIDteb	efflux of 6-beta-hydroxy simvastatin acid into bile	m01371c + m02040c + 6hsmvacid_c -> m01285c + m02039c + m02751c + 6hsmvacid_s	Drug metabolism	1000	1000	1
6HSMVhepNo1	oxidation of simvastatin to 6-beta-hydroxy simvastatin (No1)	0.00010808 prot_P10635 + pmet_6HSMVhep -> m02040r + m02554r + 6hsmv_r	Drug metabolism	1947.9	1000	1.94695
6HSMVhepNo2	oxidation of simvastatin to 6-beta-hydroxy simvastatin (No2)	0.00010808 prot_P20815 + pmet_6HSMVhep -> m02040r + m02554r + 6hsmv_r	Drug metabolism	1947.9	1000	1.94695
6HSMVhepNo3	oxidation of simvastatin to 6-beta-hydroxy simvastatin (No3)	0.00010808 prot_P10632 + pmet_6HSMVhep -> m02040r + m02554r + 6hsmv_r	Drug metabolism	355.62	1000	0.356264
6HSMVhepNo4	oxidation of simvastatin to 6-beta-hydroxy simvastatin (No4)	0.0022222 prot_P08684 + pmet_6HSMVhep -> m02040r + m02554r + 6hsmv_r	Drug metabolism	1748.2	1000	1.74746
6HSMVitr	6HSMVitr	6hsmv_r -> 6hsmv_c	Drug metabolism	1000	1000	1
6HSMVitr_REV	6HSMVitr (reversible)	6hsmv_c -> 6hsmv_r	Drug metabolism	1000	1000	1
6MELACAChepNo1	conversion of lactone form of 6-exomethylene-lovastatin to acid form (No1)	m02040c + 6melvst_c + 2.2011e-08 prot_Q15166 -> m02039c + 6melvacid_c	Drug metabolism	92.5865	1000	0.093493
6MELVACIDitr	6MELVACIDitr	6melvacid_r -> 6melvacid_c	Drug metabolism	1000	1000	1
6MELVACIDitr_REV	6MELVACIDitr (reversible)	6melvacid_c -> 6melvacid_r	Drug metabolism	1000	1000	1
6MELVACtbcNo1	release of 6-exomethylene-lovastatin-acid form into bile (No1)	m01371c + m02040c + 6melvacid_c + 9.4162e-05 prot_P08183 -> m01285c + m02039c + m02751c + 6melvacid_s	Drug metabolism	92.5865	1000	0.093493
6MELVSTitr	6MELVSTitr	6melvst_r -> 6melvst_c	Drug metabolism	1000	1000	1
6MELVSTitr_REV	6MELVSTitr (reversible)	6melvst_c -> 6melvst_r	Drug metabolism	1000	1000	1
6MELVSTthep	uptake of 6-exomethylene-lovastatin by hepatocytes	6melvst_s -> 6melvst_c	Drug metabolism	1000	1000	1
6MELVSTthep_REV	uptake of 6-exomethylene-lovastatin by hepatocytes (reversible)	6melvst_c -> 6melvst_s	Drug metabolism	1000	1000	1
6MSMVhepNo1	oxidation of simvastatin to 6-exomethylene lactone form (No1)	0.00010808 prot_P10635 + pmet_6MSMVhep -> 2 m02040r + m02554r + 6msmv_r	Drug metabolism	1149.3	1000	1.14915
6MSMVhepNo2	oxidation of simvastatin to 6-exomethylene lactone form (No2)	0.00010808 prot_P20815 + pmet_6MSMVhep -> 2 m02040r + m02554r + 6msmv_r	Drug metabolism	1149.3	1000	1.14915
6MSMVhepNo3	oxidation of simvastatin to 6-exomethylene lactone form (No3)	0.00010808 prot_P10632 + pmet_6MSMVhep -> 2 m02040r + m02554r + 6msmv_r	Drug metabolism	355.62	1000	0.356264
6MSMVhepNo4	oxidation of simvastatin to 6-exomethylene lactone form (No4)	0.0022222 prot_P08684 + pmet_6MSMVhep -> 2 m02040r + m02554r + 6msmv_r	Drug metabolism	1149.3	1000	1.14915
6OHFVSGLUhc	glucuronidation of 6-hydroxy-fluvastatin	m03109r + 5ohfvs_r -> m02039r + m03106r + 6ohfvsglu_r	Drug metabolism	1000	1000	1
6OHFVSGLUitr	6OHFVSGLUitr	6ohfvsglu_c -> 6ohfvsglu_r	Drug metabolism	1000	1000	1
6OHFVSGLUitr_REV	6OHFVSGLUitr (reversible)	6ohfvsglu_r -> 6ohfvsglu_c	Drug metabolism	1000	1000	1
6OHFVSGLUtev	exit of 6-hydroxy-fluvastatin-glucuronide into hepatic vein for excretion in urine	6ohfvsglu_c -> 6ohfvsglu_s	Drug metabolism	1000	1000	1
6OHFVSGLUtev_REV	exit of 6-hydroxy-fluvastatin-glucuronide into hepatic vein for excretion in urine (reversible)	6ohfvsglu_s -> 6ohfvsglu_c	Drug metabolism	1000	1000	1
6OHFVShcNo1	oxidation of fluvastatin to 6-hydroxy-fluvastatin in hepatocytes (No1)	m02039r + m02555r + m02630r + fvs_r + 1.177e-05 prot_P11712 -> m02040r + m02554r + 6ohfvs_r	Drug metabolism	76.5441	1000	0.0774666
6OHFVSitr	6OHFVSitr	6ohfvs_c -> 6ohfvs_r	Drug metabolism	1000	1000	1
6OHFVSitr_REV	6OHFVSitr (reversible)	6ohfvs_r -> 6ohfvs_c	Drug metabolism	1000	1000	1
6OHFVSteb	efflux of 6-hydroxy-fluvastatin into bile for excretion into faeces	m01371c + m02040c + 6ohfvs_c -> m01285c + m02039c + m02751c + 6ohfvs_s	Drug metabolism	76.5441	1000	0.0774666
7AHGLZABCt	excretion of 7-alpha-OH-gliclazide into bile	m01371c + m02040c + 7ahglz_c -> m01285c + m02039c + m02751c + 7ahglz_s	Drug metabolism	1000	1000	1
7AHGLZhr	oxidation of gliclazide to 7-alpha-OH-gliclazide in hepatocytes	m02039r + m02555r + m02630r + glz_r -> m02040r + m02554r + 7ahglz_r	Drug metabolism	1000	1000	1
7AHGLZitr	7AHGLZitr	7ahglz_r -> 7ahglz_c	Drug metabolism	1000	1000	1
7AHGLZitr_REV	7AHGLZitr (reversible)	7ahglz_c -> 7ahglz_r	Drug metabolism	1000	1000	1
7AHGLZtev	excretion of 7-alpha-OH-gliclazide into hepatic vein	7ahglz_c -> 7ahglz_s	Drug metabolism	1000	1000	1
7AHGLZtev_REV	excretion of 7-alpha-OH-gliclazide into hepatic vein (reversible)	7ahglz_s -> 7ahglz_c	Drug metabolism	1000	1000	1
7BHGLZABCt	excretion of 7-beta-OH-gliclazide into bile	m01371c + m02040c + 7bhglz_c -> m01285c + m02039c + m02751c + 7bhglz_s	Drug metabolism	1000	1000	1
7BHGLZGLCABCt	excretion of 7-beta-OH-gliclazide-glucuronide into bile	m01371c + m02040c + 7bhglzglc_c -> m01285c + m02039c + m02751c + 7bhglzglc_s	Drug metabolism	1000	1000	1
7BHGLZGLChr	glucuronidation of 7-beta-OH-gliclazide-glucuronide in hepatocytes	m03109r + 7bhglz_r -> m02039r + m03106r + 7bhglzglc_r	Drug metabolism	1000	1000	1
7BHGLZGLCitr	7BHGLZGLCitr	7bhglzglc_r -> 7bhglzglc_c	Drug metabolism	1000	1000	1
7BHGLZGLCitr_REV	7BHGLZGLCitr (reversible)	7bhglzglc_c -> 7bhglzglc_r	Drug metabolism	1000	1000	1
7BHGLZGLCtev	excretion of 7-beta-OH-gliclazide-glucuronide into hepatic vein	7bhglzglc_c -> 7bhglzglc_s	Drug metabolism	1000	1000	1
7BHGLZGLCtev_REV	excretion of 7-beta-OH-gliclazide-glucuronide into hepatic vein (reversible)	7bhglzglc_s -> 7bhglzglc_c	Drug metabolism	1000	1000	1
7BHGLZhrNo1	oxidation of gliclazide to 7-beta-OH-gliclazide in hepatocytes (No1)	1.177e-05 prot_P11712 + pmet_7BHGLZhr -> m02040r + m02554r + 7bhglz_r	Drug metabolism	76.5441	1000	0.0774666
7BHGLZhrNo2	oxidation of gliclazide to 7-beta-OH-gliclazide in hepatocytes (No2)	0.00010808 prot_P10632 + pmet_7BHGLZhr -> m02040r + m02554r + 7bhglz_r	Drug metabolism	355.62	1000	0.356264
7BHGLZhrNo3	oxidation of gliclazide to 7-beta-OH-gliclazide in hepatocytes (No3)	1.177e-05 prot_P33261 + pmet_7BHGLZhr -> m02040r + m02554r + 7bhglz_r	Drug metabolism	34.0479	1000	0.0350129
7BHGLZitr	7BHGLZitr	7bhglz_r -> 7bhglz_c	Drug metabolism	1000	1000	1
7BHGLZitr_REV	7BHGLZitr (reversible)	7bhglz_c -> 7bhglz_r	Drug metabolism	1000	1000	1
7BHGLZtev	excretion of 7-beta-OH-gliclazide into hepatic vein	7bhglz_c -> 7bhglz_s	Drug metabolism	1000	1000	1
7BHGLZtev_REV	excretion of 7-beta-OH-gliclazide into hepatic vein (reversible)	7bhglz_s -> 7bhglz_c	Drug metabolism	1000	1000	1
7DHCDCHOLabc	7-Dehydrochenodeoxycholic acid ABC bile acid transporter	m01371c + m02040c + 7dhcdchol_c -> m01285c + m02039c + m02751c + 7dhcdchol_s	Transport reactions	3755.26	1000	3.7525
7DHCDCHOLt	7-Dehydrochenodeoxycholic acid transport via bicarbonate countertransport	m02046c + 7dhcdchol_s -> m02046s + 7dhcdchol_c	Transport reactions	2755.26	1000	2.7535
7DHCDCHOLt2	7-Dehydrochenodeoxycholic acid transport via sodium cotransport	2 m02519s + 7dhcdchol_s -> 2 m02519c + 7dhcdchol_c	Transport reactions	1000	1000	1
7DHCDCHOLt_REV	7-Dehydrochenodeoxycholic acid transport via bicarbonate countertransport (reversible)	m02046s + 7dhcdchol_c -> m02046c + 7dhcdchol_s	Transport reactions	2755.26	1000	2.7535
7DHCHOLabc	7-Dehydrocholic acid ABC bile acid transporter	m01371c + m02040c + 7dhchol_c -> m01285c + m02039c + m02751c + 7dhchol_s	Transport reactions	3755.26	1000	3.7525
7DHCHOLt	7-Dehydrocholic acid transport via bicarbonate countertransport	m02046c + 7dhchol_s -> m02046s + 7dhchol_c	Transport reactions	2755.26	1000	2.7535
7DHCHOLt2	7-Dehydrocholic acid transport via sodium cotransport	2 m02519s + 7dhchol_s -> 2 m02519c + 7dhchol_c	Transport reactions	1000	1000	1
7DHCHOLt_REV	7-Dehydrocholic acid transport via bicarbonate countertransport (reversible)	m02046s + 7dhchol_c -> m02046c + 7dhchol_s	Transport reactions	2755.26	1000	2.7535
7DHCHSTEROLt	Transport of Cholesta-5, 7-Dien-3Beta-Ol, Active Transport	m01371c + m02040c + m02805c -> m01285c + m02039c + m02751c + m02805s	Transport reactions	1000	1000	1
7DHCHSTEROLtd	Transport of Cholesta-5, 7-Dien-3Beta-Ol, Diffusion	m02805c -> m02805s	Transport reactions	1000	1000	1
7DHCHSTEROLtd_REV	Transport of Cholesta-5, 7-Dien-3Beta-Ol, Diffusion (reversible)	m02805s -> m02805c	Transport reactions	1000	1000	1
7DHCHSTEROLtr	Cholesterol Precursor Intracellular Transport	m02805r -> m02805c	Transport reactions	1000	1000	1
7DHCHSTEROLtr_REV	Cholesterol Precursor Intracellular Transport (reversible)	m02805c -> m02805r	Transport reactions	1000	1000	1
7HPVShcNo1	oxidation of 3-alpha-iso-pravastatin to 7-hydroxy-3-alpha-iso-pravastatin in hepatocytes (No1)	m02039r + m02555r + m02630r + 3ispvs_r + 0.0022222 prot_P08684 -> m02040r + m02554r + 7hpvs_r	Drug metabolism	1000	1000	1
7HPVSitr	7HPVSitr	7hpvs_r -> 7hpvs_c	Drug metabolism	1000	1000	1
7HPVSitr_REV	7HPVSitr (reversible)	7hpvs_c -> 7hpvs_r	Drug metabolism	1000	1000	1
7HPVSteb	efflux of 7-hydroxy-3-alpha-iso-pravastatin into bile	m01371c + m02040c + 7hpvs_c -> m01285c + m02039c + m02751c + 7hpvs_s	Drug metabolism	2000	1000	1.999
7HPVStev	exit of 7-hydroxy-3-alpha-iso-pravastatin into hepatic vein	7hpvs_c -> 7hpvs_s	Drug metabolism	1000	1000	1
7HPVStev_REV	exit of 7-hydroxy-3-alpha-iso-pravastatin into hepatic vein (reversible)	7hpvs_s -> 7hpvs_c	Drug metabolism	1000	1000	1
7KILTCHOLATP	Transport of 7-Ketolithocholate, Active Transport	m01371c + m02040c + 7klitchol_c -> m01285c + m02039c + m02751c + 7klitchol_s	Transport reactions	2000	1000	1.999
7KILTCHOLt	Transport of 7-Ketolithocholate, Sodium Symport	m02519c + 7klitchol_c -> m02519s + 7klitchol_s	Transport reactions	1000	1000	1
7KILTCHOLt_REV	Transport of 7-Ketolithocholate, Sodium Symport (reversible)	m02519s + 7klitchol_s -> m02519c + 7klitchol_c	Transport reactions	1000	1000	1
7KLITCHOLc	Formation of 7-Ketolithocholate	m02039c + m02555c + m02630c + C02528_c -> 2 m02040c + m02554c + 7klitchol_c	Bile acid biosynthesis	1000	1000	1
7OHOCTAc	Formation of 7-Hydroxy-Octanoate	m02039c + m02555c + m02630c + m02642c -> m02040c + m02554c + 7ohocata_c	Fatty acid oxidation	1000	1000	1
7OHOCTAte	Transport of 7-Hydroxy-Octanoate, Extracellular	7ohocata_c -> 7ohocata_s	Transport reactions	1000	1000	1
AACTte	Assumed Passive Diffusion into Extracellular Space	m01332s -> m01332c	Transport reactions	1000	1000	1
AACTte_REV	Assumed Passive Diffusion into Extracellular Space (reversible)	m01332c -> m01332s	Transport reactions	1000	1000	1
ABTD1	L-Arabinitol 4-Dehydrogenase	m02552c + abt_D_c -> m02039c + m02425c + m02553c	Pentose phosphate pathway	1000	1000	1
ABTD1_REV	L-Arabinitol 4-Dehydrogenase (reversible)	m02039c + m02425c + m02553c -> m02552c + abt_D_c	Pentose phosphate pathway	1000	1000	1
ABT_Dt	D-Arabitol Transport via Diffusion	abt_D_s -> abt_D_c	Transport reactions	1000	1000	1
ABT_Dt2	D-Arabitol Transport in via Proton Symporter	m02039s + abt_D_s -> m02039c + abt_D_c	Transport reactions	1000	1000	1
ABT_Dt2_REV	D-Arabitol Transport in via Proton Symporter (reversible)	m02039c + abt_D_c -> m02039s + abt_D_s	Transport reactions	1000	1000	1
ABT_Dt_REV	D-Arabitol Transport via Diffusion (reversible)	abt_D_c -> abt_D_s	Transport reactions	1000	1000	1
ACACtx	Acetoacetate Intracellular Transport Unknown Mechanism	m01253c -> m01253p	Transport reactions	1000	1000	1
ACACtx_REV	Acetoacetate Intracellular Transport Unknown Mechanism (reversible)	m01253p -> m01253c	Transport reactions	1000	1000	1
ACCOALNo1	Acetate Coenzyme A Ligase (ADP-Forming) (No1)	m01371c + m01597c + m02772c + 4.6296e-05 prot_Q9NR19 -> m01285c + m02751c + m02774c	Propanoate metabolism	1142.39	1000	1.14224
ACCOAtr	Acetyl Coenzyme A Transport	m01261c -> m01261r	Transport reactions	918.872	1000	0.918953
ACCOAtr_REV	Acetyl Coenzyme A Transport (reversible)	m01261r -> m01261c	Transport reactions	918.872	1000	0.918953
ACGALtr	N-Acetylgalactosamine Export	m02525c -> m02525s	Transport reactions	1000	1000	1
ACGLUtd	Transport of N-Acetyl-L-Glutamate, Diffusion	m02536c -> m02536s	Transport reactions	1000	1000	1
ACGLUtd_REV	Transport of N-Acetyl-L-Glutamate, Diffusion (reversible)	m02536s -> m02536c	Transport reactions	1000	1000	1
ACGLUtm	Transport of N-Acetyl-L-Glutamate, Mitochondrial	m02536c -> m02536m	Transport reactions	1000	1000	1
ACGLUtm_REV	Transport of N-Acetyl-L-Glutamate, Mitochondrial (reversible)	m02536m -> m02536c	Transport reactions	1000	1000	1
ACGLYtc	Intra-Cellular Transport of Acetyl-Glycine	acgly_m -> acgly_c	Transport reactions	1000	1000	1
ACGLYtc_REV	Intra-Cellular Transport of Acetyl-Glycine (reversible)	acgly_c -> acgly_m	Transport reactions	1000	1000	1
ACGLYte	Extracellular Transport of Acetyl-Glycine	acgly_c -> acgly_s	Transport reactions	1000	1000	1
ACGLYte_REV	Extracellular Transport of Acetyl-Glycine (reversible)	acgly_s -> acgly_c	Transport reactions	1000	1000	1
ACHOMm	Acetylation of Homoserine	m01261m + m02136m -> m01597m + m02039m + achom_L_m	Glycine, serine and threonine metabolism	1000	1000	1
ACHOMte	Transport of Acetyl Homoserine, Extracellular	achom_L_c -> achom_L_s	Transport reactions	1000	1000	1
ACHOMte_REV	Transport of Acetyl Homoserine, Extracellular (reversible)	achom_L_s -> achom_L_c	Transport reactions	1000	1000	1
ACHOMtm	Transport of Acetyl Homoserine, Intracellular	achom_L_m -> achom_L_c	Transport reactions	1000	1000	1
ACHOMtm_REV	Transport of Acetyl Homoserine, Intracellular (reversible)	achom_L_c -> achom_L_m	Transport reactions	1000	1000	1
ACHVESSEC	Acetylcholine Secretion via Secretory Vesicle (ATP Driven)	m01260c + m01371c + m02040c -> m01260s + m01285c + m02039c + m02751c	Transport reactions	34.0479	1000	0.0350129
ACILEm	Acetylation of Isoleucine	m01261m + m02184m -> m01597m + m02039m + acile_L_m	Valine, leucine, and isoleucine metabolism	1000	1000	1
ACILEte	Transport of Acetyl Isoleucine, Extracellular	acile_L_c -> acile_L_s	Transport reactions	1000	1000	1
ACILEte_REV	Transport of Acetyl Isoleucine, Extracellular (reversible)	acile_L_s -> acile_L_c	Transport reactions	1000	1000	1
ACILEtm	Transport of Acetyl Isoleucine, Intracellular	acile_L_m -> acile_L_c	Transport reactions	1000	1000	1
ACILEtm_REV	Transport of Acetyl Isoleucine, Intracellular (reversible)	acile_L_c -> acile_L_m	Transport reactions	1000	1000	1
ACLEUm	Acetylation of Leucine	m01261m + m02360m -> m01597m + m02039m + acleu_L_m	Valine, leucine, and isoleucine metabolism	1000	1000	1
ACLEUte	Transport of Acetyl Leucine, Extracellular	acleu_L_c -> acleu_L_s	Transport reactions	1000	1000	1
ACLEUte_REV	Transport of Acetyl Leucine, Extracellular (reversible)	acleu_L_s -> acleu_L_c	Transport reactions	1000	1000	1
ACLEUtm	Transport of Acetyl Leucine, Intracellular	acleu_L_m -> acleu_L_c	Transport reactions	1000	1000	1
ACLEUtm_REV	Transport of Acetyl Leucine, Intracellular (reversible)	acleu_L_c -> acleu_L_m	Transport reactions	1000	1000	1
ACLYSHYc	Hydrolysis of Acetyl-Lysine	m02040c + aclys_c -> m01252c + m02426c	Lysine metabolism	1000	1000	1
ACLYSHYc_REV	Hydrolysis of Acetyl-Lysine (reversible)	m01252c + m02426c -> m02040c + aclys_c	Lysine metabolism	1000	1000	1
ACLYSt	Transport of Acetyl-Lysine, Extracellular	aclys_c -> aclys_s	Transport reactions	1000	1000	1
ACLYSt_REV	Transport of Acetyl-Lysine, Extracellular (reversible)	aclys_s -> aclys_c	Transport reactions	1000	1000	1
ACLYStm	Intracellular Transport of Acetyl-Lysine	aclys_m -> aclys_c	Transport reactions	1000	1000	1
ACLYStm_REV	Intracellular Transport of Acetyl-Lysine (reversible)	aclys_c -> aclys_m	Transport reactions	1000	1000	1
ACMPGLUChrNo1	glucuronidation of acetaminophen in hepatocytes (No1)	5.0875e-08 prot_P19224 + pmet_ACMPGLUChr -> m02039r + m03106r + acmpglu_r	Drug metabolism	1000	1000	1
ACMPGLUChrNo2	glucuronidation of acetaminophen in hepatocytes (No2)	5.0875e-08 prot_O60656 + pmet_ACMPGLUChr -> m02039r + m03106r + acmpglu_r	Drug metabolism	1000	1000	1
ACMPGLUChrNo3	glucuronidation of acetaminophen in hepatocytes (No3)	5.0875e-08 prot_P22309 + pmet_ACMPGLUChr -> m02039r + m03106r + acmpglu_r	Drug metabolism	1000	1000	1
ACMPGLUTTRsc	ACMPGLUTTRsc	acmpglut_r -> m01974r + cysacmp_r + m01986r	Drug metabolism	1000	1000	1
ACMPGLUTdt	uptake of acetaminophen-glutathione-conjugate into the enterocytes	acmpglut_s -> acmpglut_c	Drug metabolism	1000	1000	1
ACMPGLUTdt_REV	uptake of acetaminophen-glutathione-conjugate into the enterocytes (reversible)	acmpglut_c -> acmpglut_s	Drug metabolism	1000	1000	1
ACMPGLUTitr	ACMPGLUTitr	acmpglut_c -> acmpglut_r	Drug metabolism	1000	1000	1
ACMPGLUTitr_REV	ACMPGLUTitr (reversible)	acmpglut_r -> acmpglut_c	Drug metabolism	1000	1000	1
ACMPGLUTtep	efflux of acetaminophen-glutathione-conjugate from enterocytes into portal blood	m01371c + m02040c + acmpglut_c -> m01285c + m02039c + m02751c + acmpglut_s	Drug metabolism	2794.01	1000	2.79222
ACMPGLUTthc	uptake of acetaminophen-glutathione-conjugate by the hepatocytes	m01371c + m02040c + acmpglut_s -> m01285c + m02039c + m02751c + acmpglut_c	Drug metabolism	2794.01	1000	2.79222
ACMPGLUitr	ACMPGLUitr	acmpglu_r -> acmpglu_c	Drug metabolism	1000	1000	1
ACMPGLUitr_REV	ACMPGLUitr (reversible)	acmpglu_c -> acmpglu_r	Drug metabolism	1000	1000	1
ACMPGLUtep	efflux of acetaminophen-glucuronide-conjugate from enterocytes into portal blood	m01371c + m02040c + acmpglu_c -> m01285c + m02039c + m02751c + acmpglu_s	Drug metabolism	2794.01	1000	2.79222
ACMPGLUthc	uptake of acetaminophen-glucuronide-conjugate by the hepatocytes	m01371c + m02040c + acmpglu_s -> m01285c + m02039c + m02751c + acmpglu_c	Drug metabolism	2794.01	1000	2.79222
ACMPShcNo1	sulphation of acetaminophen in hepatocytes (No1)	m02682c + acmp_c + 0.0022401 prot_P50225 -> m02039c + m02681c + sulpacmp_c	Drug metabolism	301.863	1000	0.30256
ACMPdt	uptake of acetaminophen by enterocytes	acmp_s -> acmp_c	Drug metabolism	1000	1000	1
ACMPdt_REV	uptake of acetaminophen by enterocytes (reversible)	acmp_c -> acmp_s	Drug metabolism	1000	1000	1
ACMPitr	ACMPitr	acmp_c -> acmp_r	Drug metabolism	1000	1000	1
ACMPitr_REV	ACMPitr (reversible)	acmp_r -> acmp_c	Drug metabolism	1000	1000	1
ACMPthc	uptake of acetaminophen by the hepatocytes	m01371c + m02040c + acmp_s -> m01285c + m02039c + m02751c + acmp_c	Drug metabolism	2092.59	1000	2.09149
ACMPtuNo1	efflux of acetaminophen by P-gp from the enterocytes into lumen (No1)	m01371c + m02040c + acmp_c + 9.4162e-05 prot_P08183 -> m01285c + m02039c + m02751c + acmp_s	Drug metabolism	92.5865	1000	0.093493
ACNAMt2	N-Acetylneuraminate Proton Symport	m02039s + m02543s -> m02039c + m02543c	Transport reactions	1000	1000	1
ACNAMtr	N-Acetylneuraminate Export	m02543c -> m02543s	Transport reactions	1000	1000	1
ACORNt	Diffusion of N(2)-Acetyl-L-Ornithine	m02546c -> m02546s	Transport reactions	1000	1000	1
ACORNt_REV	Diffusion of N(2)-Acetyl-L-Ornithine (reversible)	m02546s -> m02546c	Transport reactions	1000	1000	1
ACOX22xNo1	Acyl-Coenzyme A Oxidase 2, Branched Chain (No1)	m00755p + m01803p + 0.5 m02630p + 9.2593e-06 prot_Q99424 -> m00037p + m01802p	Bile acid biosynthesis	1404.19	1000	1.40378
ACRNte	Transport of O-Acetylcarnitine	m02519c + m02634c -> m02519s + m02634s	Transport reactions	419.587	1000	0.420167
ACRNte_REV	Transport of O-Acetylcarnitine (reversible)	m02519s + m02634s -> m02519c + m02634c	Transport reactions	419.587	1000	0.420167
ACRNtm	O-Acetylcarnintine Transport into Mitochondria via Diffusion	m02634c -> m02634m	Transport reactions	445.117	1000	0.445672
ACRNtm_REV	O-Acetylcarnintine Transport into Mitochondria via Diffusion (reversible)	m02634m -> m02634c	Transport reactions	445.117	1000	0.445672
ACRNtr	Transport of Acetyl Carnitine	m02634s -> m02634c	Transport reactions	1000	1000	1
ACRNtr_REV	Transport of Acetyl Carnitine (reversible)	m02634c -> m02634s	Transport reactions	1000	1000	1
ACTHRtc	Intra-Cellular Transport of Acetyl-Threonine	acthr_L_m -> acthr_L_c	Transport reactions	1000	1000	1
ACTHRtc_REV	Intra-Cellular Transport of Acetyl-Threonine (reversible)	acthr_L_c -> acthr_L_m	Transport reactions	1000	1000	1
ACTHRte	Extracellular Transport of Acetyl-Threonine	acthr_L_c -> acthr_L_s	Transport reactions	1000	1000	1
ACTHRte_REV	Extracellular Transport of Acetyl-Threonine (reversible)	acthr_L_s -> acthr_L_c	Transport reactions	1000	1000	1
ACTYRm	Acetylation of Tyrosine	m01261m + m03101m -> m01597m + m02039m + actyr_m	Tyrosine metabolism	1000	1000	1
ACTYRtc	Transport of N-Acetyl-Tyrosine into Cytosol	actyr_m -> actyr_c	Transport reactions	1000	1000	1
ACTYRte	Secretion of N-Acetyl-Tyrosine	actyr_c -> actyr_s	Transport reactions	1000	1000	1
ACt2m	Acetate Mitochondrial Transport via Proton Symport	m01252c + m02039c -> m01252m + m02039m	Transport reactions	1000	1000	1
ACt2m_REV	Acetate Mitochondrial Transport via Proton Symport (reversible)	m01252m + m02039m -> m01252c + m02039c	Transport reactions	1000	1000	1
ADNCNT3tc	Adenosine Transport Cnt3	m01280s + m02039s -> m01280c + m02039c	Transport reactions	1065.37	1000	1.0653
ADNCNT3tc_REV	Adenosine Transport Cnt3 (reversible)	m01280c + m02039c -> m01280s + m02039s	Transport reactions	1065.37	1000	1.0653
ADNK3	Adenosine Kinase	m01280c + m02034c -> m01334c + m01948c + m02039c	Purine metabolism	1000	1000	1
ADNK4	Adenosine Kinase	m01280c + m01688c -> m01334c + m01680c + m02039c	Purine metabolism	1000	1000	1
ADPACDAc	Activation of Adipic Acid for Formation of Adipoyl Carnitine	m01371c + m01597c + adpac_c -> m01334c + m02759c + adpcoa_c	Fatty acid oxidation	1000	1000	1
ADPACtd	Transport of Adipic Acid, Diffusion	adpac_c -> adpac_s	Transport reactions	1000	1000	1
ADPACtd_REV	Transport of Adipic Acid, Diffusion (reversible)	adpac_s -> adpac_c	Transport reactions	1000	1000	1
ADPACtx	Transport into Cytosol (Diffusion)	adpac_p -> adpac_c	Fatty acid oxidation	1000	1000	1
ADPACtx_REV	Transport into Cytosol (Diffusion) (reversible)	adpac_c -> adpac_p	Fatty acid oxidation	1000	1000	1
ADPCOACROTNo1	Production of Adipoyl Carnitine (No1)	m02348p + adpcoa_p + 0.00075689 prot_Q9UKG9 -> m01597p + c6dc_p	Fatty acid oxidation	732.704	1000	0.732971
ADPCOACROT_REVNo1	Production of Adipoyl Carnitine (reversible) (No1)	m01597p + c6dc_p + 0.00075689 prot_Q9UKG9 -> m02348p + adpcoa_p	Fatty acid oxidation	732.704	1000	0.732971
ADPCOAPTENo1	Thioesterification of Adipoyl Coenzyme A for Release into Cytosol (No1)	m02040p + adpcoa_p + 1.5964e-07 prot_O14734 -> m01597p + m02039p + adpac_p	Fatty acid oxidation	873.213	1000	0.87334
ADPOHc	Hydroxylation of 2-Oxoadipate	m00670c + m02039c + m02553c -> m02552c + adpoh_c	Lysine metabolism	1000	1000	1
ADPOHc_REV	Hydroxylation of 2-Oxoadipate (reversible)	m02552c + adpoh_c -> m00670c + m02039c + m02553c	Lysine metabolism	1000	1000	1
ADPOHt	Secretion of 2-Hydroxyadipic Acid	adpoh_c -> adpoh_s	Transport reactions	1000	1000	1
ADPOHt_REV	Secretion of 2-Hydroxyadipic Acid (reversible)	adpoh_s -> adpoh_c	Transport reactions	1000	1000	1
ADPRDPmNo1	ADPribose Diphosphatase, Mitochondrial (No1)	m02040m + m01288m + 7.9365e-06 prot_Q9BW91 -> m01334m + 2 m02039m + m02845m	Nucleotide metabolism	0	0	1
ADRNCOAtx	Fatty Acid Intracellular Transport	m00119c -> m00119p	Transport reactions	1000	1000	1
ADRNCOAtx_REV	Fatty Acid Intracellular Transport (reversible)	m00119p -> m00119c	Transport reactions	1000	1000	1
ADRNCRNt	Transport into the Mitochondria (Carnitine)	m02636c -> m02636m	Fatty acid oxidation	445.117	1000	0.445672
ADRNCRNt_REV	Transport into the Mitochondria (Carnitine) (reversible)	m02636m -> m02636c	Fatty acid oxidation	445.117	1000	0.445672
ADRNLPVESSEC	Adrenaline Secretion via Secretory Vesicle (ATP Driven)	m01290c + m01371c + m02040c -> m01285c + m01290s + m02039c + m02751c	Transport reactions	1000	1000	1
AHANDROSTANteNo1	Transport of 3Alpha-Hydroxy-5Beta-Androstan-17-One, Extracellular (No1)	m01371c + m01800c + m02040c + 9.4162e-05 prot_P08183 -> m01285c + m01800s + m02039c + m02751c	Transport reactions	92.5865	1000	0.093493
AHANDROSTANtr	Transport of 3Alpha-Hydroxy-5Beta-Androstan-17-One, Endoplasmatic Reticulum	m01371c + m01800r + m02040c -> m01285c + m01800c + m02039c + m02751c	Transport reactions	1000	1000	1
AHCYStd	Diffusion of S-Adenosyl-L-Homocysteine	m02871m -> m02871c	Transport reactions	1000	1000	1
AHCYStd_REV	Diffusion of S-Adenosyl-L-Homocysteine (reversible)	m02871c -> m02871m	Transport reactions	1000	1000	1
AHCYSte	Transport of S-Adenosyl-L-Homocysteine	m02871s -> m02871c	Transport reactions	1000	1000	1
AHCYSte_REV	Transport of S-Adenosyl-L-Homocysteine (reversible)	m02871c -> m02871s	Transport reactions	1000	1000	1
AICARte	Transport of 5-Amino-1- (5-Phospho-D-Ribosyl)Imidazole-4-Carboxamide	m01304s -> m01304c	Transport reactions	1000	1000	1
AICARte_REV	Transport of 5-Amino-1- (5-Phospho-D-Ribosyl)Imidazole-4-Carboxamide (reversible)	m01304c -> m01304s	Transport reactions	1000	1000	1
AK2LGCHOLABCtNo1	1-Alkyl 2-Acylglycerol 3-Phosphocholine Transport (No1)	9.4162e-05 prot_P21439 + pmet_AK2LGCHOLABCt -> m00516s + m01285c + m02039c + m02751c	Transport reactions	2000	1000	1.999
AK2LGCHOLABCtNo2	1-Alkyl 2-Acylglycerol 3-Phosphocholine Transport (No2)	pmet_AK2LGCHOLABCt + 2.1368e-06 prot_O43520 -> m00516s + m01285c + m02039c + m02751c	Transport reactions	442.308	1000	0.442866
AK2LGCHOLABCtNo3	1-Alkyl 2-Acylglycerol 3-Phosphocholine Transport (No3)	pmet_AK2LGCHOLABCt + 2.1368e-06 prot_P98198 -> m00516s + m01285c + m02039c + m02751c	Transport reactions	825.042	1000	0.825217
AK2LGCHOLABCtNo4	1-Alkyl 2-Acylglycerol 3-Phosphocholine Transport (No4)	2.1368e-06 prot_O95477 + pmet_AK2LGCHOLABCt -> m00516s + m01285c + m02039c + m02751c	Transport reactions	2000	1000	1.999
AK2LGCHOLABCtNo5	1-Alkyl 2-Acylglycerol 3-Phosphocholine Transport (No5)	2.1368e-06 prot_O60312 + pmet_AK2LGCHOLABCt -> m00516s + m01285c + m02039c + m02751c	Transport reactions	297.287	1000	0.297989
ALAALACNcNo1	Hydrolysis of Alanylalanine (No1)	4.4803e-06 prot_Q96KP4 + pmet_ALAALACNc -> 2 m01307c	Transport reactions	561.875	1000	0.562313
ALAALACNcNo2	Hydrolysis of Alanylalanine (No2)	2.0129e-06 prot_Q96KN2 + pmet_ALAALACNc -> 2 m01307c	Transport reactions	261531	1000	261.271
ALAALACNc_REVNo1	Hydrolysis of Alanylalanine (reversible) (No1)	4.4803e-06 prot_Q96KP4 + pmet_ALAALACNc_REV -> m02040c + alaala_c	Transport reactions	561.875	1000	0.562313
ALAALACNc_REVNo2	Hydrolysis of Alanylalanine (reversible) (No2)	2.0129e-06 prot_Q96KN2 + pmet_ALAALACNc_REV -> m02040c + alaala_c	Transport reactions	261531	1000	261.271
ALAALAPEPT1tc	Transport of Alanylalanine by the Apical Pept1 Amino Acid Transporters	m02039s + alaala_s -> m02039c + alaala_c	Transport reactions	8.51984	1000	0.00951033
ALAARGCYSr	Metabolism (Formation/Degradation) of AlaArgCys	2 m02040c + alaargcys_c -> m01307c + m01365c + m01628c	Peptide metabolism	1000	1000	1
ALAARGCYSr_REV	Metabolism (Formation/Degradation) of AlaArgCys (reversible)	m01307c + m01365c + m01628c -> 2 m02040c + alaargcys_c	Peptide metabolism	1000	1000	1
ALAARGCYSt	Transport of AlaArgCys, Extracellular	m02039s + alaargcys_s -> m02039c + alaargcys_c	Transport reactions	1191.21	1000	1.19102
ALAARGCYSt_REV	Transport of AlaArgCys, Extracellular (reversible)	m02039c + alaargcys_c -> m02039s + alaargcys_s	Transport reactions	1191.21	1000	1.19102
ALAARGGLYr	Metabolism (Formation/Degradation) of AlaArgGly	2 m02040c + alaarggly_c -> m01307c + m01365c + m01986c	Peptide metabolism	1000	1000	1
ALAARGGLYr_REV	Metabolism (Formation/Degradation) of AlaArgGly (reversible)	m01307c + m01365c + m01986c -> 2 m02040c + alaarggly_c	Peptide metabolism	1000	1000	1
ALAARGGLYt	Transport of AlaArgGly, Extracellular	m02039s + alaarggly_s -> m02039c + alaarggly_c	Transport reactions	1191.21	1000	1.19102
ALAARGGLYt_REV	Transport of AlaArgGly, Extracellular (reversible)	m02039c + alaarggly_c -> m02039s + alaarggly_s	Transport reactions	1191.21	1000	1.19102
ALAASNLEUr	Metabolism (Formation/Degradation) of AlaAsnLeu	2 m02040c + alaasnleu_c -> m01307c + m01369c + m02360c	Peptide metabolism	1000	1000	1
ALAASNLEUr_REV	Metabolism (Formation/Degradation) of AlaAsnLeu (reversible)	m01307c + m01369c + m02360c -> 2 m02040c + alaasnleu_c	Peptide metabolism	1000	1000	1
ALAASNLEUt	Transport of AlaAsnLeu, Extracellular	m02039s + alaasnleu_s -> m02039c + alaasnleu_c	Transport reactions	1191.21	1000	1.19102
ALAASNLEUt_REV	Transport of AlaAsnLeu, Extracellular (reversible)	m02039c + alaasnleu_c -> m02039s + alaasnleu_s	Transport reactions	1191.21	1000	1.19102
ALAB0AT3tc	Alanine Transport by B0At3	m01307s + m01442s + m02519s -> m01307c + m01442c + m02519c	Transport reactions	1000	1000	1
ALAGLYLYSr	Metabolism (Formation/Degradation) of AlaGlyLys	2 m02040c + alaglylys_c -> m01307c + m01986c + m02426c	Peptide metabolism	1000	1000	1
ALAGLYLYSr_REV	Metabolism (Formation/Degradation) of AlaGlyLys (reversible)	m01307c + m01986c + m02426c -> 2 m02040c + alaglylys_c	Peptide metabolism	1000	1000	1
ALAGLYLYSt	Transport of AlaGlyLys, Extracellular	m02039s + alaglylys_s -> m02039c + alaglylys_c	Transport reactions	1191.21	1000	1.19102
ALAGLYLYSt_REV	Transport of AlaGlyLys, Extracellular (reversible)	m02039c + alaglylys_c -> m02039s + alaglylys_s	Transport reactions	1191.21	1000	1.19102
ALAHISALAr	Metabolism (Formation/Degradation) of AlaHisAla	2 m02040c + alahisala_c -> 2 m01307c + m02125c	Peptide metabolism	1000	1000	1
ALAHISALAr_REV	Metabolism (Formation/Degradation) of AlaHisAla (reversible)	2 m01307c + m02125c -> 2 m02040c + alahisala_c	Peptide metabolism	1000	1000	1
ALAHISALAt	Transport of AlaHisAla, Extracellular	m02039s + alahisala_s -> m02039c + alahisala_c	Transport reactions	1191.21	1000	1.19102
ALAHISALAt_REV	Transport of AlaHisAla, Extracellular (reversible)	m02039c + alahisala_c -> m02039s + alahisala_s	Transport reactions	1191.21	1000	1.19102
ALALYSTHRr	Metabolism (Formation/Degradation) of AlaLysThr	2 m02040c + alalysthr_c -> m01307c + m02426c + m02993c	Peptide metabolism	1000	1000	1
ALALYSTHRr_REV	Metabolism (Formation/Degradation) of AlaLysThr (reversible)	m01307c + m02426c + m02993c -> 2 m02040c + alalysthr_c	Peptide metabolism	1000	1000	1
ALALYSTHRt	Transport of AlaLysThr, Extracellular	m02039s + alalysthr_s -> m02039c + alalysthr_c	Transport reactions	1191.21	1000	1.19102
ALALYSTHRt_REV	Transport of AlaLysThr, Extracellular (reversible)	m02039c + alalysthr_c -> m02039s + alalysthr_s	Transport reactions	1191.21	1000	1.19102
ALAt2rL	L-Alanine Reversible Transport via Proton Symport, Lysosomal	m01307l + m02039l -> m01307c + m02039c	Transport reactions	332.463	1000	0.33313
ALAt2rL_REV	L-Alanine Reversible Transport via Proton Symport, Lysosomal (reversible)	m01307c + m02039c -> m01307l + m02039l	Transport reactions	332.463	1000	0.33313
ALAyLATthc	Transport of Alanine by Y+Lat1 Or Y+Lat2 with Symporter of H	m01307s + m01365c + m02039s -> m01307c + m01365s + m02039c	Transport reactions	694.911	1000	0.695216
ALDD21No1	Aldehyde Dehydrogenase (Pristanal, NAD) (No1)	m02040c + m02552c + m00564c + 7.9365e-05 prot_P51648 -> 2 m02039c + m02553c + m02766c	Fatty acid oxidation	710.061	1000	0.710351
ALKPNo1	Alkaline Phosphatase (No1)	2.8607e-07 prot_P05186 + pmet_ALKP -> m02751c + m01984c	Glycerophospholipid metabolism	0	0	1
ALKPNo2	Alkaline Phosphatase (No2)	2.8607e-07 prot_P05187 + pmet_ALKP -> m02751c + m01984c	Glycerophospholipid metabolism	0	0	1
ALKPNo3	Alkaline Phosphatase (No3)	2.8607e-07 prot_P10696 + pmet_ALKP -> m02751c + m01984c	Glycerophospholipid metabolism	0	0	1
ALKPNo4	Alkaline Phosphatase (No4)	2.8607e-07 prot_P09923 + pmet_ALKP -> m02751c + m01984c	Glycerophospholipid metabolism	0	0	1
ALLOP1tu	uptake of allopurinol by the enterocytes	m02519s + allop_s -> m02519c + allop_c	Drug metabolism	1312.96	1000	1.31265
ALLOP2tu	uptake of allopurinol by the enterocytes	m02039s + allop_s -> m02039c + allop_c	Drug metabolism	1047.47	1000	1.04742
ALLOPOXDhepNo1	oxidation of allopurinol to oxypurinol in hepatocytes (No1)	9.2593e-06 prot_Q06278 + pmet_ALLOPOXDhep -> m02041c + oxyp_c	Drug metabolism	199.116	1000	0.199916
ALLOPOXDhepNo2	oxidation of allopurinol to oxypurinol in hepatocytes (No2)	9.2593e-06 prot_P47989 + pmet_ALLOPOXDhep -> m02041c + oxyp_c	Drug metabolism	312.963	1000	0.313649
ALLOPtepvb	uptake of allopurinol by the hepatocytes	allop_s -> allop_c	Drug metabolism	1000	1000	1
ALLOPtepvb_REV	uptake of allopurinol by the hepatocytes (reversible)	allop_c -> allop_s	Drug metabolism	1000	1000	1
ALLTNt	Transport of Allantoin	m01313c -> m01313s	Transport reactions	1000	1000	1
ALLTNt_REV	Transport of Allantoin (reversible)	m01313s -> m01313c	Transport reactions	1000	1000	1
ALPA_HStc	Intracellular Transport of Lysophosphatidic Acid	alpa_hs_p -> alpa_hs_c	Transport reactions	1000	1000	1
ALPA_HStc_REV	Intracellular Transport of Lysophosphatidic Acid (reversible)	alpa_hs_c -> alpa_hs_p	Transport reactions	1000	1000	1
ALPA_HSx	Acyl-DHAP Reductase	m01278p + m02039p + m02555p -> m02554p + alpa_hs_p	Triacylglycerol synthesis	0	0	1
AM19CSALThrNo1	alternative pathway for formation of AM19 from AM1 in hepatocytes (No1)	0.00010808 prot_P20815 + pmet_AM19CSALThr -> m02040r + m02554r + am19cs_r	Drug metabolism	1000	1000	1
AM19CSALThrNo2	alternative pathway for formation of AM19 from AM1 in hepatocytes (No2)	0.0022222 prot_P08684 + pmet_AM19CSALThr -> m02040r + m02554r + am19cs_r	Drug metabolism	1000	1000	1
AM19CShr	oxidation of AM9 to AM19 (cyclosporine) in hepatocytes	m02039r + m02555r + m02630r + am9csa_r -> m02040r + m02554r + am19cs_r	Drug metabolism	1000	1000	1
AM19CSitr	AM19CSitr	am19cs_r -> am19cs_c	Drug metabolism	1000	1000	1
AM19CSitr_REV	AM19CSitr (reversible)	am19cs_c -> am19cs_r	Drug metabolism	1000	1000	1
AM19CSteb	efflux of AM19-cyclosporine into bile	m01371c + m02040c + am19cs_c -> m01285c + m02039c + m02751c + am19cs_s	Drug metabolism	1000	1000	1
AM1A4NCShc	demethylation of AM1A to AM1A4N in hepatocytes	m02039c + m02871c + am1acs_c -> m02877c + am1a4ncs_c	Drug metabolism	1000	1000	1
AM1A4NCSteb	efflux of AM1A4N-cyclosporine into bile	m01371c + m02040c + am1a4ncs_c -> m01285c + m02039c + m02751c + am1a4ncs_s	Drug metabolism	1000	1000	1
AM1ACCShr	oxidation of AM1c to AM1Ac in hepatocytes (alternative mechanism)	m02630r + am1ccs_r -> m02039r + m02040r + am1accs_r	Drug metabolism	1000	1000	1
AM1ACCSitr	AM1ACCSitr	am1accs_c -> am1accs_r	Drug metabolism	1000	1000	1
AM1ACCSitr_REV	AM1ACCSitr (reversible)	am1accs_r -> am1accs_c	Drug metabolism	1000	1000	1
AM1ACCStev	efflux of AM1Ac-cyclosporine into hepatic vein	am1accs_c -> am1accs_s	Drug metabolism	1000	1000	1
AM1ACCStev_REV	efflux of AM1Ac-cyclosporine into hepatic vein (reversible)	am1accs_s -> am1accs_c	Drug metabolism	1000	1000	1
AM1ACShr	formation of AM1A-cyclosporine in hepatocytes	m02555r + m02630r + am1alcs_r -> m02040r + m02554r + am1acs_r	Drug metabolism	1000	1000	1
AM1ACSitr	AM1ACSitr	am1acs_r -> am1acs_c	Drug metabolism	1000	1000	1
AM1ACSitr_REV	AM1ACSitr (reversible)	am1acs_c -> am1acs_r	Drug metabolism	1000	1000	1
AM1ACSteb	efflux of AM1A-cyclosporine into bile	m01371c + m02040c + am1acs_c -> m01285c + m02039c + m02751c + am1acs_s	Drug metabolism	1000	1000	1
AM1ACStep	efflux of AM1A (cyclosporine) into portal blood	am1acs_c -> am1acs_s	Drug metabolism	1000	1000	1
AM1ACStep_REV	efflux of AM1A (cyclosporine) into portal blood (reversible)	am1acs_s -> am1acs_c	Drug metabolism	1000	1000	1
AM1ALCShr	formation of AM1AL-cyclosporine in hepatocytes	m02554c + am1csa_c -> m02039c + m02555c + am1alcs_c	Drug metabolism	1000	1000	1
AM1ALCSitr	AM1ALCSitr	am1alcs_c -> am1alcs_r	Drug metabolism	1000	1000	1
AM1ALCSitr_REV	AM1ALCSitr (reversible)	am1alcs_r -> am1alcs_c	Drug metabolism	1000	1000	1
AM1ALCSteb	efflux of AM1AL-cyclosporine into bile	m01371c + m02040c + am1alcs_c -> m01285c + m02039c + m02751c + am1alcs_s	Drug metabolism	1000	1000	1
AM1ALCStep	efflux of AM1AL (cyclosporine) into portal blood	am1alcs_c -> am1alcs_s	Drug metabolism	1000	1000	1
AM1ALCStep_REV	efflux of AM1AL (cyclosporine) into portal blood (reversible)	am1alcs_s -> am1alcs_c	Drug metabolism	1000	1000	1
AM1C4N9CShc	demethylation of AM1c9 to AM1c4N9 in hepatocytes (alternative mechanism)	m02039c + m02871c + am1c9cs_c -> m02877c + am1c4n9cs_c	Drug metabolism	1000	1000	1
AM1C4N9CSteb	efflux of AM1c4N9-cyclosporine into bile	m01371c + m02040c + am1c4n9cs_c -> m01285c + m02039c + m02751c + am1c4n9cs_s	Drug metabolism	1000	1000	1
AM1C9CShr	oxidation of AM1c to AM1c9 in hepatocytes (alternative mechanism)	m02039r + m02555r + m02630r + am1ccs_r -> m02040r + m02554r + am1c9cs_r	Drug metabolism	1000	1000	1
AM1C9CSitr	AM1C9CSitr	am1c9cs_r -> am1c9cs_c	Drug metabolism	1000	1000	1
AM1C9CSitr_REV	AM1C9CSitr (reversible)	am1c9cs_c -> am1c9cs_r	Drug metabolism	1000	1000	1
AM1C9CSteb	efflux of AM1c9-cyclosporine into bile	m01371c + m02040c + am1c9cs_c -> m01285c + m02039c + m02751c + am1c9cs_s	Drug metabolism	1000	1000	1
AM1C9CStev	efflux of AM1c9-cyclosporine into hepatic vein	am1c9cs_c -> am1c9cs_s	Drug metabolism	1000	1000	1
AM1C9CStev_REV	efflux of AM1c9-cyclosporine into hepatic vein (reversible)	am1c9cs_s -> am1c9cs_c	Drug metabolism	1000	1000	1
AM1CCShr	oxidation of cyclosporine to AM1c in hepatocytes	m02039r + m02555r + m02630r + csa_r -> m02040r + m02554r + am1ccs_r	Drug metabolism	1000	1000	1
AM1CCSitr	AM1CCSitr	am1ccs_r -> am1ccs_c	Drug metabolism	1000	1000	1
AM1CCSitr_REV	AM1CCSitr (reversible)	am1ccs_c -> am1ccs_r	Drug metabolism	1000	1000	1
AM1CCSteb	efflux of AM1c-cyclosporine into bile	m01371c + m02040c + am1ccs_c -> m01285c + m02039c + m02751c + am1ccs_s	Drug metabolism	1000	1000	1
AM1CCStev	efflux of AM1c-cyclosporine into hepatic vein	am1ccs_c -> am1ccs_s	Drug metabolism	1000	1000	1
AM1CCStev_REV	efflux of AM1c-cyclosporine into hepatic vein (reversible)	am1ccs_s -> am1ccs_c	Drug metabolism	1000	1000	1
AM1CGLChr	glucuronidation of AM1c in hepatocytes	m03109r + am1ccs_r -> m02039r + m03106r + am1cglc_r	Drug metabolism	1000	1000	1
AM1CGLCitr	AM1CGLCitr	am1cglc_c -> am1cglc_r	Drug metabolism	1000	1000	1
AM1CGLCitr_REV	AM1CGLCitr (reversible)	am1cglc_r -> am1cglc_c	Drug metabolism	1000	1000	1
AM1CGLCteb	efflux of AM1c-glucuronide into bile	m01371c + m02040c + am1cglc_c -> m01285c + m02039c + m02751c + am1cglc_s	Drug metabolism	1000	1000	1
AM1CSAhrNo1	oxidation of cyclosporine to AM1 in hepatocytes (No1)	0.00010808 prot_P20815 + pmet_AM1CSAhr -> m02040r + m02554r + am1csa_r	Drug metabolism	1000	1000	1
AM1CSAhrNo2	oxidation of cyclosporine to AM1 in hepatocytes (No2)	0.0022222 prot_P08684 + pmet_AM1CSAhr -> m02040r + m02554r + am1csa_r	Drug metabolism	1000	1000	1
AM1CSAitr	AM1CSAitr	am1csa_r -> am1csa_c	Drug metabolism	1000	1000	1
AM1CSAitr_REV	AM1CSAitr (reversible)	am1csa_c -> am1csa_r	Drug metabolism	1000	1000	1
AM1CSAtep	efflux of AM1 (cyclosporine) into portal blood	am1csa_c -> am1csa_s	Drug metabolism	1000	1000	1
AM1CSAtep_REV	efflux of AM1 (cyclosporine) into portal blood (reversible)	am1csa_s -> am1csa_c	Drug metabolism	1000	1000	1
AM4N9CShc	demethylation of AM9 to AM4N9 in hepatocytes	m02039c + m02871c + am9csa_c -> m02877c + am4n9cs_c	Drug metabolism	1000	1000	1
AM4N9CShr	oxidation of AM4N to AM4N9 in hepatocytes	m02039r + m02555r + m02630r + am4ncs_r -> m02040r + m02554r + am4n9cs_r	Drug metabolism	1000	1000	1
AM4N9CSitr	AM4N9CSitr	am4n9cs_r -> am4n9cs_c	Drug metabolism	1000	1000	1
AM4N9CSitr_REV	AM4N9CSitr (reversible)	am4n9cs_c -> am4n9cs_r	Drug metabolism	1000	1000	1
AM4N9CStev	efflux of AM4N9-cyclosporine into hepatic vein	am4n9cs_c -> am4n9cs_s	Drug metabolism	1000	1000	1
AM4N9CStev_REV	efflux of AM4N9-cyclosporine into hepatic vein (reversible)	am4n9cs_s -> am4n9cs_c	Drug metabolism	1000	1000	1
AM4NC9CSteb	efflux of AM4N9-cyclosporine into bile	m01371c + m02040c + am4n9cs_c -> m01285c + m02039c + m02751c + am4n9cs_s	Drug metabolism	1000	1000	1
AM4NCShr	demethylation of cyclosporine to AM4N in hepatocytes	m02039c + m02871c + csa_c -> m02877c + am4ncs_c	Drug metabolism	1000	1000	1
AM4NCSitr	AM4NCSitr	am4ncs_c -> am4ncs_r	Drug metabolism	1000	1000	1
AM4NCSitr_REV	AM4NCSitr (reversible)	am4ncs_r -> am4ncs_c	Drug metabolism	1000	1000	1
AM4NCSteb	efflux of AM4N-cyclosporine into bile	m01371c + m02040c + am4ncs_c -> m01285c + m02039c + m02751c + am4ncs_s	Drug metabolism	1000	1000	1
AM4NCStep	efflux of AM4N (cyclosporine) into portal blood	am4ncs_c -> am4ncs_s	Drug metabolism	1000	1000	1
AM4NCStep_REV	efflux of AM4N (cyclosporine) into portal blood (reversible)	am4ncs_s -> am4ncs_c	Drug metabolism	1000	1000	1
AM9CSAhrNo1	oxidation of cyclosporine to AM9 in hepatocytes (No1)	0.00010808 prot_P20815 + pmet_AM9CSAhr -> m02040r + m02554r + am9csa_r	Drug metabolism	1000	1000	1
AM9CSAhrNo2	oxidation of cyclosporine to AM9 in hepatocytes (No2)	0.0022222 prot_P08684 + pmet_AM9CSAhr -> m02040r + m02554r + am9csa_r	Drug metabolism	1000	1000	1
AM9CSAitr	AM9CSAitr	am9csa_r -> am9csa_c	Drug metabolism	1000	1000	1
AM9CSAitr_REV	AM9CSAitr (reversible)	am9csa_c -> am9csa_r	Drug metabolism	1000	1000	1
AM9CSAteb	efflux of AM9-cyclosporine into bile	m01371c + m02040c + am9csa_c -> m01285c + m02039c + m02751c + am9csa_s	Drug metabolism	1000	1000	1
AM9CSAtep	efflux of AM9 (cyclosporine) into portal blood	am9csa_c -> am9csa_s	Drug metabolism	1000	1000	1
AM9CSAtep_REV	efflux of AM9 (cyclosporine) into portal blood (reversible)	am9csa_s -> am9csa_c	Drug metabolism	1000	1000	1
AMACR2pNo1	Alpha-Methylacyl Coenzyme A Racemase (Reductase) (No1)	m00614p + 0.5 m02630p + 4.5612e-06 prot_Q9UHK6 -> m00755p + m02040p	Bile acid biosynthesis	1627.17	1000	1.62655
AMACR2rNo1	Alpha-Methylacyl Coenzyme A Racemase (Reductase) (No1)	m00614r + 0.5 m02630r + 4.5612e-06 prot_Q9UHK6 -> m02040r + m00755r	Bile acid biosynthesis	0	0	1
AMACRrNo1	Alpha-Methylacyl Coenzyme A Racemase (No1)	m00616r + 4.5612e-06 prot_Q9UHK6 -> m00618r	Bile acid biosynthesis	0	0	1
AMETAMte	Assumed Passive Diffusion into Extracellular Space	m02870c -> m02870s	Transport reactions	1000	1000	1
AMETAMte_REV	Assumed Passive Diffusion into Extracellular Space (reversible)	m02870s -> m02870c	Transport reactions	1000	1000	1
AMETt	Transport of S-Adenosyl-L-Methionine, Paracellular Transport	m02877c -> m02877s	Transport reactions	1000	1000	1
AMETt_REV	Transport of S-Adenosyl-L-Methionine, Paracellular Transport (reversible)	m02877s -> m02877c	Transport reactions	1000	1000	1
AMY2eNo1	Alpha-Amylase, Extracellular (Glygn2 -> Glygn4) (No1)	pmet_AMY2e + 6.2704e-07 prot_P82251 + 6.2704e-07 prot_Q07837 -> 8 m01965s + glygn4_s	Starch and sucrose metabolism	993.741	875	1.13555
AMY2eNo2	Alpha-Amylase, Extracellular (Glygn2 -> Glygn4) (No2)	pmet_AMY2e + 6.2704e-07 prot_P08195 -> 8 m01965s + glygn4_s	Starch and sucrose metabolism	694.911	875	0.794419
AMY2eNo3	Alpha-Amylase, Extracellular (Glygn2 -> Glygn4) (No3)	6.2704e-07 prot_P04745 + pmet_AMY2e -> 8 m01965s + glygn4_s	Starch and sucrose metabolism	1000	875	1.14269
AMY2eNo4	Alpha-Amylase, Extracellular (Glygn2 -> Glygn4) (No4)	6.2704e-07 prot_P19961 + pmet_AMY2e -> 8 m01965s + glygn4_s	Starch and sucrose metabolism	1000	875	1.14269
AMY2eNo5	Alpha-Amylase, Extracellular (Glygn2 -> Glygn4) (No5)	6.2704e-07 prot_P04746 + pmet_AMY2e -> 8 m01965s + glygn4_s	Starch and sucrose metabolism	1000	875	1.14269
AND19ONEcNo1	Hydroxylation of Androst-4-Ene-3, 17-Dione (No1)	m00971c + m02039c + m02555c + m02630c + 0.00010808 prot_P10635 -> m02040c + m02554c + and19one_c	Steroid metabolism	1000	1000	1
AND19ONEt	Secretion of 19-Hydroxyandrost-4-Ene-3, 17-Dione	and19one_c -> and19one_s	Transport reactions	1000	1000	1
AND19ONEt_REV	Secretion of 19-Hydroxyandrost-4-Ene-3, 17-Dione (reversible)	and19one_s -> and19one_c	Transport reactions	1000	1000	1
ANDRSTANDRteNo1	Transport of 5Alpha-Androstane-3, 17-Dione, Extracellular (No1)	m01064c + m01371c + m02040c + 9.4162e-05 prot_P08183 -> m01285c + m02039c + m02751c + m01064s	Transport reactions	92.5865	1000	0.093493
ANDRSTANDRtr	Transport of 5Alpha-Androstane-3, 17-Dione, Endoplasmatic Reticulum	m01064r + m01371c + m02040c -> m01064c + m01285c + m02039c + m02751c	Transport reactions	1000	1000	1
ANDRSTNDNteNo1	Transport of Androst-4-Ene-3, 17-Dione, Extracellular (No1)	m00971c + m01371c + m02040c + 9.4162e-05 prot_P08183 -> m01285c + m02039c + m02751c + m00971s	Transport reactions	92.5865	1000	0.093493
ANTHte	Transport of Anthranilate	m01342s -> m01342c	Transport reactions	1000	1000	1
ANTHte_REV	Transport of Anthranilate (reversible)	m01342c -> m01342s	Transport reactions	1000	1000	1
APOCFm	Apocarboxylase Formation, Mitochondrial	m02426m + m00185m -> m02039m + m02040m + m01356m	Biotin metabolism	1000	1000	1
APOC_LYS_BTNPm	Proteolysis of ApoC-Lys-Biotin, Mitochondrial	m02040m + m01357m -> m00185m + m01400m	Biotin metabolism	1000	1000	1
APRGSTRNABCt	Hydroxyprogesterone Transport, Active	m00580s + m01371c + m02040c + m02519s -> m00580c + m01285c + m02039c + m02519c + m02751c	Transport reactions	1000	1000	1
APRGSTRNt1e	Hydroxyprogesterone Transport, Antiport	m00580s + m02147c -> m00580c + m02147s	Transport reactions	551.442	1000	0.55189
APRGSTRNt1e_REV	Hydroxyprogesterone Transport, Antiport (reversible)	m00580c + m02147s -> m00580s + m02147c	Transport reactions	551.442	1000	0.55189
ARACHCOAtx	Fatty Acid Intracellular Transport	m01773c -> m01773p	Transport reactions	1000	1000	1
ARACHCOAtx_REV	Fatty Acid Intracellular Transport (reversible)	m01773p -> m01773c	Transport reactions	1000	1000	1
ARACHCRNt	Transport into the Mitochondria (Carnitine)	m01772c -> m01772m	Fatty acid oxidation	445.117	1000	0.445672
ARACHCRNt_REV	Transport into the Mitochondria (Carnitine) (reversible)	m01772m -> m01772c	Fatty acid oxidation	445.117	1000	0.445672
ARACHDCOAtx	Fatty Acid Intracellular Transport	m01364c -> m01364p	Transport reactions	1000	1000	1
ARACHDCOAtx_REV	Fatty Acid Intracellular Transport (reversible)	m01364p -> m01364c	Transport reactions	1000	1000	1
ARACHDFATPtcNo1	Arachidonate (N-C18:1) Transport by FATP (No1)	4.6296e-05 prot_Q6PCB7 + pmet_ARACHDFATPtc -> m01334c + m01364c + m02759c	Transport reactions	3209.24	1000	3.20703
ARACHDFATPtcNo2	Arachidonate (N-C18:1) Transport by FATP (No2)	4.6296e-05 prot_Q6P1M0 + pmet_ARACHDFATPtc -> m01334c + m01364c + m02759c	Transport reactions	915.21	1000	0.915294
ARACHDtr	Intracellular Transport	m01362c -> m01362r	Transport reactions	1000	1000	1
ARACHDtr_REV	Intracellular Transport (reversible)	m01362r -> m01362c	Transport reactions	1000	1000	1
ARACHFATPc	Uptake of Arachidate	m01371c + m01597c + m01771s -> m01334c + m01773c + m02759c	Transport reactions	1000	1000	1
ARGALAALAr	Metabolism (Formation/Degradation) of ArgAlaAla	m01365c + alaala_c -> m02040c + argalaala_c	Peptide metabolism	1000	1000	1
ARGALAALAr_REV	Metabolism (Formation/Degradation) of ArgAlaAla (reversible)	m02040c + argalaala_c -> m01365c + alaala_c	Peptide metabolism	1000	1000	1
ARGALAALAt	Transport of ArgAlaAla, Extracellular	m02039s + argalaala_s -> m02039c + argalaala_c	Transport reactions	1191.21	1000	1.19102
ARGALAALAt_REV	Transport of ArgAlaAla, Extracellular (reversible)	m02039c + argalaala_c -> m02039s + argalaala_s	Transport reactions	1191.21	1000	1.19102
ARGALAPHEr	Metabolism (Formation/Degradation) of ArgAlaPhe	2 m02040c + argalaphe_c -> m01307c + m01365c + m02724c	Peptide metabolism	1000	1000	1
ARGALAPHEr_REV	Metabolism (Formation/Degradation) of ArgAlaPhe (reversible)	m01307c + m01365c + m02724c -> 2 m02040c + argalaphe_c	Peptide metabolism	1000	1000	1
ARGALAPHEt	Transport of ArgAlaPhe, Extracellular	m02039s + argalaphe_s -> m02039c + argalaphe_c	Transport reactions	1191.21	1000	1.19102
ARGALAPHEt_REV	Transport of ArgAlaPhe, Extracellular (reversible)	m02039c + argalaphe_c -> m02039s + argalaphe_s	Transport reactions	1191.21	1000	1.19102
ARGALATHRr	Metabolism (Formation/Degradation) of ArgAlaThr	2 m02040c + argalathr_c -> m01307c + m01365c + m02993c	Peptide metabolism	1000	1000	1
ARGALATHRr_REV	Metabolism (Formation/Degradation) of ArgAlaThr (reversible)	m01307c + m01365c + m02993c -> 2 m02040c + argalathr_c	Peptide metabolism	1000	1000	1
ARGALATHRt	Transport of ArgAlaThr, Extracellular	m02039s + argalathr_s -> m02039c + argalathr_c	Transport reactions	1191.21	1000	1.19102
ARGALATHRt_REV	Transport of ArgAlaThr, Extracellular (reversible)	m02039c + argalathr_c -> m02039s + argalathr_s	Transport reactions	1191.21	1000	1.19102
ARGARGLYSr	Metabolism (Formation/Degradation) of ArgArgLys	2 m02040c + argarglys_c -> 2 m01365c + m02426c	Peptide metabolism	1000	1000	1
ARGARGLYSr_REV	Metabolism (Formation/Degradation) of ArgArgLys (reversible)	2 m01365c + m02426c -> 2 m02040c + argarglys_c	Peptide metabolism	1000	1000	1
ARGARGLYSt	Transport of ArgArgLys, Extracellular	m02039s + argarglys_s -> m02039c + argarglys_c	Transport reactions	1191.21	1000	1.19102
ARGARGLYSt_REV	Transport of ArgArgLys, Extracellular (reversible)	m02039c + argarglys_c -> m02039s + argarglys_s	Transport reactions	1191.21	1000	1.19102
ARGARGMETr	Metabolism (Formation/Degradation) of ArgArgMet	2 m02040c + argargmet_c -> 2 m01365c + m02471c	Peptide metabolism	1000	1000	1
ARGARGMETr_REV	Metabolism (Formation/Degradation) of ArgArgMet (reversible)	2 m01365c + m02471c -> 2 m02040c + argargmet_c	Peptide metabolism	1000	1000	1
ARGARGMETt	Transport of ArgArgMet, Extracellular	m02039s + argargmet_s -> m02039c + argargmet_c	Transport reactions	1191.21	1000	1.19102
ARGARGMETt_REV	Transport of ArgArgMet, Extracellular (reversible)	m02039c + argargmet_c -> m02039s + argargmet_s	Transport reactions	1191.21	1000	1.19102
ARGARGr	Metabolism (Formation/Degradation) of ArgArg	m02040c + argarg_c -> 2 m01365c	Peptide metabolism	1000	1000	1
ARGARGr_REV	Metabolism (Formation/Degradation) of ArgArg (reversible)	2 m01365c -> m02040c + argarg_c	Peptide metabolism	1000	1000	1
ARGARGt	Transport of ArgArg, Extracellular	m02039s + argarg_s -> m02039c + argarg_c	Transport reactions	1191.21	1000	1.19102
ARGARGt_REV	Transport of ArgArg, Extracellular (reversible)	m02039c + argarg_c -> m02039s + argarg_s	Transport reactions	1191.21	1000	1.19102
ARGB0AT3tc	Arginine Transport by B0At3	m01365s + m01442s + m02519s -> m01365c + m01442c + m02519c	Transport reactions	1000	1000	1
ARGCYSGLYr	Metabolism (Formation/Degradation) of ArgCysGly	2 m02040c + argcysgly_c -> m01365c + m01628c + m01986c	Peptide metabolism	1000	1000	1
ARGCYSGLYr_REV	Metabolism (Formation/Degradation) of ArgCysGly (reversible)	m01365c + m01628c + m01986c -> 2 m02040c + argcysgly_c	Peptide metabolism	1000	1000	1
ARGCYSGLYt	Transport of ArgCysGly, Extracellular	m02039s + argcysgly_s -> m02039c + argcysgly_c	Transport reactions	1191.21	1000	1.19102
ARGCYSGLYt_REV	Transport of ArgCysGly, Extracellular (reversible)	m02039c + argcysgly_c -> m02039s + argcysgly_s	Transport reactions	1191.21	1000	1.19102
ARGCYSSERr	Metabolism (Formation/Degradation) of ArgCysSer	2 m02040c + argcysser_c -> m01365c + m01628c + m02896c	Peptide metabolism	1000	1000	1
ARGCYSSERr_REV	Metabolism (Formation/Degradation) of ArgCysSer (reversible)	m01365c + m01628c + m02896c -> 2 m02040c + argcysser_c	Peptide metabolism	1000	1000	1
ARGCYSSERt	Transport of ArgCysSer, Extracellular	m02039s + argcysser_s -> m02039c + argcysser_c	Transport reactions	1191.21	1000	1.19102
ARGCYSSERt_REV	Transport of ArgCysSer, Extracellular (reversible)	m02039c + argcysser_c -> m02039s + argcysser_s	Transport reactions	1191.21	1000	1.19102
ARGGLUGLUr	Metabolism (Formation/Degradation) of ArgGluGlu	2 m02040c + arggluglu_c -> m01365c + 2 m01974c	Peptide metabolism	1000	1000	1
ARGGLUGLUr_REV	Metabolism (Formation/Degradation) of ArgGluGlu (reversible)	m01365c + 2 m01974c -> 2 m02040c + arggluglu_c	Peptide metabolism	1000	1000	1
ARGGLUGLUt	Transport of ArgGluGlu, Extracellular	m02039s + arggluglu_s -> m02039c + arggluglu_c	Transport reactions	1191.21	1000	1.19102
ARGGLUGLUt_REV	Transport of ArgGluGlu, Extracellular (reversible)	m02039c + arggluglu_c -> m02039s + arggluglu_s	Transport reactions	1191.21	1000	1.19102
ARGGLUPROr	Metabolism (Formation/Degradation) of ArgGluPro	2 m02040c + argglupro_c -> m01365c + m01974c + m02770c	Peptide metabolism	1000	1000	1
ARGGLUPROr_REV	Metabolism (Formation/Degradation) of ArgGluPro (reversible)	m01365c + m01974c + m02770c -> 2 m02040c + argglupro_c	Peptide metabolism	1000	1000	1
ARGGLUPROt	Transport of ArgGluPro, Extracellular	m02039s + argglupro_s -> m02039c + argglupro_c	Transport reactions	1191.21	1000	1.19102
ARGGLUPROt_REV	Transport of ArgGluPro, Extracellular (reversible)	m02039c + argglupro_c -> m02039s + argglupro_s	Transport reactions	1191.21	1000	1.19102
ARGGLYGLYr	Metabolism (Formation/Degradation) of ArgGlyGly	m01365c + glygly_c -> m02040c + argglygly_c	Peptide metabolism	1000	1000	1
ARGGLYGLYr_REV	Metabolism (Formation/Degradation) of ArgGlyGly (reversible)	m02040c + argglygly_c -> m01365c + glygly_c	Peptide metabolism	1000	1000	1
ARGGLYGLYt	Transport of ArgGlyGly, Extracellular	m02039s + argglygly_s -> m02039c + argglygly_c	Transport reactions	1191.21	1000	1.19102
ARGGLYGLYt_REV	Transport of ArgGlyGly, Extracellular (reversible)	m02039c + argglygly_c -> m02039s + argglygly_s	Transport reactions	1191.21	1000	1.19102
ARGHISTHRr	Metabolism (Formation/Degradation) of ArgHisThr	2 m02040c + arghisthr_c -> m01365c + m02125c + m02993c	Peptide metabolism	1000	1000	1
ARGHISTHRr_REV	Metabolism (Formation/Degradation) of ArgHisThr (reversible)	m01365c + m02125c + m02993c -> 2 m02040c + arghisthr_c	Peptide metabolism	1000	1000	1
ARGHISTHRt	Transport of ArgHisThr, Extracellular	m02039s + arghisthr_s -> m02039c + arghisthr_c	Transport reactions	1191.21	1000	1.19102
ARGHISTHRt_REV	Transport of ArgHisThr, Extracellular (reversible)	m02039c + arghisthr_c -> m02039s + arghisthr_s	Transport reactions	1191.21	1000	1.19102
ARGLEUPHEr	Metabolism (Formation/Degradation) of ArgLeuPhe	2 m02040c + argleuphe_c -> m01365c + m02360c + m02724c	Peptide metabolism	1000	1000	1
ARGLEUPHEr_REV	Metabolism (Formation/Degradation) of ArgLeuPhe (reversible)	m01365c + m02360c + m02724c -> 2 m02040c + argleuphe_c	Peptide metabolism	1000	1000	1
ARGLEUPHEt	Transport of ArgLeuPhe, Extracellular	m02039s + argleuphe_s -> m02039c + argleuphe_c	Transport reactions	1191.21	1000	1.19102
ARGLEUPHEt_REV	Transport of ArgLeuPhe, Extracellular (reversible)	m02039c + argleuphe_c -> m02039s + argleuphe_s	Transport reactions	1191.21	1000	1.19102
ARGLYSASPr	Metabolism (Formation/Degradation) of ArgLysAsp	2 m02040c + arglysasp_c -> m01365c + m01370c + m02426c	Peptide metabolism	1000	1000	1
ARGLYSASPr_REV	Metabolism (Formation/Degradation) of ArgLysAsp (reversible)	m01365c + m01370c + m02426c -> 2 m02040c + arglysasp_c	Peptide metabolism	1000	1000	1
ARGLYSASPt	Transport of ArgLysAsp, Extracellular	m02039s + arglysasp_s -> m02039c + arglysasp_c	Transport reactions	1191.21	1000	1.19102
ARGLYSASPt_REV	Transport of ArgLysAsp, Extracellular (reversible)	m02039c + arglysasp_c -> m02039s + arglysasp_s	Transport reactions	1191.21	1000	1.19102
ARGN1ASPMDte	Transport by Y+Lat-2 into Extracellular Space	m01365s + m02503c -> m01365c + m02503s	Transport reactions	636.443	1000	0.636806
ARGPHEARGr	Metabolism (Formation/Degradation) of ArgPheArg	2 m02040c + argphearg_c -> 2 m01365c + m02724c	Peptide metabolism	1000	1000	1
ARGPHEARGr_REV	Metabolism (Formation/Degradation) of ArgPheArg (reversible)	2 m01365c + m02724c -> 2 m02040c + argphearg_c	Peptide metabolism	1000	1000	1
ARGPHEARGt	Transport of ArgPheArg, Extracellular	m02039s + argphearg_s -> m02039c + argphearg_c	Transport reactions	1191.21	1000	1.19102
ARGPHEARGt_REV	Transport of ArgPheArg, Extracellular (reversible)	m02039c + argphearg_c -> m02039s + argphearg_s	Transport reactions	1191.21	1000	1.19102
ARGPROMETr	Metabolism (Formation/Degradation) of ArgProMet	2 m02040c + argpromet_c -> m01365c + m02471c + m02770c	Peptide metabolism	1000	1000	1
ARGPROMETr_REV	Metabolism (Formation/Degradation) of ArgProMet (reversible)	m01365c + m02471c + m02770c -> 2 m02040c + argpromet_c	Peptide metabolism	1000	1000	1
ARGPROMETt	Transport of ArgProMet, Extracellular	m02039s + argpromet_s -> m02039c + argpromet_c	Transport reactions	1191.21	1000	1.19102
ARGPROMETt_REV	Transport of ArgProMet, Extracellular (reversible)	m02039c + argpromet_c -> m02039s + argpromet_s	Transport reactions	1191.21	1000	1.19102
ARGPROTHRr	Metabolism (Formation/Degradation) of ArgProThr	2 m02040c + argprothr_c -> m01365c + m02770c + m02993c	Peptide metabolism	1000	1000	1
ARGPROTHRr_REV	Metabolism (Formation/Degradation) of ArgProThr (reversible)	m01365c + m02770c + m02993c -> 2 m02040c + argprothr_c	Peptide metabolism	1000	1000	1
ARGPROTHRt	Transport of ArgProThr, Extracellular	m02039s + argprothr_s -> m02039c + argprothr_c	Transport reactions	1191.21	1000	1.19102
ARGPROTHRt_REV	Transport of ArgProThr, Extracellular (reversible)	m02039c + argprothr_c -> m02039s + argprothr_s	Transport reactions	1191.21	1000	1.19102
ARGSERSERr	Metabolism (Formation/Degradation) of ArgSerSer	2 m02040c + argserser_c -> m01365c + 2 m02896c	Peptide metabolism	1000	1000	1
ARGSERSERr_REV	Metabolism (Formation/Degradation) of ArgSerSer (reversible)	m01365c + 2 m02896c -> 2 m02040c + argserser_c	Peptide metabolism	1000	1000	1
ARGSERSERt	Transport of ArgSerSer, Extracellular	m02039s + argserser_s -> m02039c + argserser_c	Transport reactions	1191.21	1000	1.19102
ARGSERSERt_REV	Transport of ArgSerSer, Extracellular (reversible)	m02039c + argserser_c -> m02039s + argserser_s	Transport reactions	1191.21	1000	1.19102
ARGSUCte	Transport of L-Arginosuccinic Acid	m01366c -> m01366s	Transport reactions	1000	1000	1
ARGTYRVALr	Metabolism (Formation/Degradation) of ArgtyrVal	2 m02040c + argtyrval_c -> m01365c + m03101c + m03135c	Peptide metabolism	1000	1000	1
ARGTYRVALr_REV	Metabolism (Formation/Degradation) of ArgtyrVal (reversible)	m01365c + m03101c + m03135c -> 2 m02040c + argtyrval_c	Peptide metabolism	1000	1000	1
ARGTYRVALt	Transport of ArgtyrVal, Extracellular	m02039s + argtyrval_s -> m02039c + argtyrval_c	Transport reactions	1191.21	1000	1.19102
ARGTYRVALt_REV	Transport of ArgtyrVal, Extracellular (reversible)	m02039c + argtyrval_c -> m02039s + argtyrval_s	Transport reactions	1191.21	1000	1.19102
ARGVALCYSr	Metabolism (Formation/Degradation) of ArgValCys	2 m02040c + argvalcys_c -> m01365c + m01628c + m03135c	Peptide metabolism	1000	1000	1
ARGVALCYSr_REV	Metabolism (Formation/Degradation) of ArgValCys (reversible)	m01365c + m01628c + m03135c -> 2 m02040c + argvalcys_c	Peptide metabolism	1000	1000	1
ARGVALCYSt	Transport of ArgValCys, Extracellular	m02039s + argvalcys_s -> m02039c + argvalcys_c	Transport reactions	1191.21	1000	1.19102
ARGVALCYSt_REV	Transport of ArgValCys, Extracellular (reversible)	m02039c + argvalcys_c -> m02039s + argvalcys_s	Transport reactions	1191.21	1000	1.19102
ARGVALTRPr	Metabolism (Formation/Degradation) of ArgValTrp	2 m02040c + argvaltrp_c -> m01365c + m03089c + m03135c	Peptide metabolism	1000	1000	1
ARGVALTRPr_REV	Metabolism (Formation/Degradation) of ArgValTrp (reversible)	m01365c + m03089c + m03135c -> 2 m02040c + argvaltrp_c	Peptide metabolism	1000	1000	1
ARGVALTRPt	Transport of ArgValTrp, Extracellular	m02039s + argvaltrp_s -> m02039c + argvaltrp_c	Transport reactions	1191.21	1000	1.19102
ARGVALTRPt_REV	Transport of ArgValTrp, Extracellular (reversible)	m02039c + argvaltrp_c -> m02039s + argvaltrp_s	Transport reactions	1191.21	1000	1.19102
ARGtm	Arginine Mitochondrial Transport via Ornithine Carrier	m01365c + m02039m -> m01365m + m02039c	Transport reactions	592.477	1000	0.592884
ARGtm_REV	Arginine Mitochondrial Transport via Ornithine Carrier (reversible)	m01365m + m02039c -> m01365c + m02039m	Transport reactions	592.477	1000	0.592884
ASCBSVCTtc	Transport of L-Ascorbate by Svct1 Or Svct2 Transporter	m01368s + m01371c + m02040c + 2 m02519s -> m01285c + m01368c + m02039c + 2 m02519c + m02751c	Transport reactions	2000	1000	1.999
ASNASNARGr	Metabolism (Formation/Degradation) of AsnAsnArg	2 m02040c + asnasnarg_c -> m01365c + 2 m01369c	Peptide metabolism	1000	1000	1
ASNASNARGr_REV	Metabolism (Formation/Degradation) of AsnAsnArg (reversible)	m01365c + 2 m01369c -> 2 m02040c + asnasnarg_c	Peptide metabolism	1000	1000	1
ASNASNARGt	Transport of AsnAsnArg, Extracellular	m02039s + asnasnarg_s -> m02039c + asnasnarg_c	Transport reactions	1191.21	1000	1.19102
ASNASNARGt_REV	Transport of AsnAsnArg, Extracellular (reversible)	m02039c + asnasnarg_c -> m02039s + asnasnarg_s	Transport reactions	1191.21	1000	1.19102
ASNATB0tc	Transport of L-Asparagine by Atb0 Transporter	m01369s + m01442s + 2 m02519s -> m01369c + m01442c + 2 m02519c	Transport reactions	1000	1000	1
ASNB0AT3tc	Asparagine Transport by B0At3	m01369s + m01442s + m02519s -> m01369c + m01442c + m02519c	Transport reactions	1000	1000	1
ASNCYSCYSr	Metabolism (Formation/Degradation) of AsnCysCys	2 m02040c + asncyscys_c -> m01369c + 2 m01628c	Peptide metabolism	1000	1000	1
ASNCYSCYSr_REV	Metabolism (Formation/Degradation) of AsnCysCys (reversible)	m01369c + 2 m01628c -> 2 m02040c + asncyscys_c	Peptide metabolism	1000	1000	1
ASNCYSCYSt	Transport of AsnCysCys, Extracellular	m02039s + asncyscys_s -> m02039c + asncyscys_c	Transport reactions	1191.21	1000	1.19102
ASNCYSCYSt_REV	Transport of AsnCysCys, Extracellular (reversible)	m02039c + asncyscys_c -> m02039s + asncyscys_s	Transport reactions	1191.21	1000	1.19102
ASNMETPROr	Metabolism (Formation/Degradation) of AsnMetPro	2 m02040c + asnmetpro_c -> m01369c + m02471c + m02770c	Peptide metabolism	1000	1000	1
ASNMETPROr_REV	Metabolism (Formation/Degradation) of AsnMetPro (reversible)	m01369c + m02471c + m02770c -> 2 m02040c + asnmetpro_c	Peptide metabolism	1000	1000	1
ASNMETPROt	Transport of AsnMetPro, Extracellular	m02039s + asnmetpro_s -> m02039c + asnmetpro_c	Transport reactions	1191.21	1000	1.19102
ASNMETPROt_REV	Transport of AsnMetPro, Extracellular (reversible)	m02039c + asnmetpro_c -> m02039s + asnmetpro_s	Transport reactions	1191.21	1000	1.19102
ASNPHEASPr	Metabolism (Formation/Degradation) of AsnPheAsp	2 m02040c + asnpheasp_c -> m01369c + m01370c + m02724c	Peptide metabolism	1000	1000	1
ASNPHEASPr_REV	Metabolism (Formation/Degradation) of AsnPheAsp (reversible)	m01369c + m01370c + m02724c -> 2 m02040c + asnpheasp_c	Peptide metabolism	1000	1000	1
ASNPHEASPt	Transport of AsnPheAsp, Extracellular	m02039s + asnpheasp_s -> m02039c + asnpheasp_c	Transport reactions	1191.21	1000	1.19102
ASNPHEASPt_REV	Transport of AsnPheAsp, Extracellular (reversible)	m02039c + asnpheasp_c -> m02039s + asnpheasp_s	Transport reactions	1191.21	1000	1.19102
ASNPHECYSr	Metabolism (Formation/Degradation) of AsnPheCys	2 m02040c + asnphecys_c -> m01369c + m01628c + m02724c	Peptide metabolism	1000	1000	1
ASNPHECYSr_REV	Metabolism (Formation/Degradation) of AsnPheCys (reversible)	m01369c + m01628c + m02724c -> 2 m02040c + asnphecys_c	Peptide metabolism	1000	1000	1
ASNPHECYSt	Transport of AsnPheCys, Extracellular	m02039s + asnphecys_s -> m02039c + asnphecys_c	Transport reactions	1191.21	1000	1.19102
ASNPHECYSt_REV	Transport of AsnPheCys, Extracellular (reversible)	m02039c + asnphecys_c -> m02039s + asnphecys_s	Transport reactions	1191.21	1000	1.19102
ASNTYRGLYr	Metabolism (Formation/Degradation) of AsntyrGly	2 m02040c + asntyrgly_c -> m01369c + m01986c + m03101c	Peptide metabolism	1000	1000	1
ASNTYRGLYr_REV	Metabolism (Formation/Degradation) of AsntyrGly (reversible)	m01369c + m01986c + m03101c -> 2 m02040c + asntyrgly_c	Peptide metabolism	1000	1000	1
ASNTYRGLYt	Transport of AsntyrGly, Extracellular	m02039s + asntyrgly_s -> m02039c + asntyrgly_c	Transport reactions	1191.21	1000	1.19102
ASNTYRGLYt_REV	Transport of AsntyrGly, Extracellular (reversible)	m02039c + asntyrgly_c -> m02039s + asntyrgly_s	Transport reactions	1191.21	1000	1.19102
ASNTYRPHEr	Metabolism (Formation/Degradation) of AsntyrPhe	2 m02040c + asntyrphe_c -> m01369c + m02724c + m03101c	Peptide metabolism	1000	1000	1
ASNTYRPHEr_REV	Metabolism (Formation/Degradation) of AsntyrPhe (reversible)	m01369c + m02724c + m03101c -> 2 m02040c + asntyrphe_c	Peptide metabolism	1000	1000	1
ASNTYRPHEt	Transport of AsntyrPhe, Extracellular	m02039s + asntyrphe_s -> m02039c + asntyrphe_c	Transport reactions	1191.21	1000	1.19102
ASNTYRPHEt_REV	Transport of AsntyrPhe, Extracellular (reversible)	m02039c + asntyrphe_c -> m02039s + asntyrphe_s	Transport reactions	1191.21	1000	1.19102
ASNTYRTHRr	Metabolism (Formation/Degradation) of AsntyrThr	2 m02040c + asntyrthr_c -> m01369c + m02993c + m03101c	Peptide metabolism	1000	1000	1
ASNTYRTHRr_REV	Metabolism (Formation/Degradation) of AsntyrThr (reversible)	m01369c + m02993c + m03101c -> 2 m02040c + asntyrthr_c	Peptide metabolism	1000	1000	1
ASNTYRTHRt	Transport of AsntyrThr, Extracellular	m02039s + asntyrthr_s -> m02039c + asntyrthr_c	Transport reactions	1191.21	1000	1.19102
ASNTYRTHRt_REV	Transport of AsntyrThr, Extracellular (reversible)	m02039c + asntyrthr_c -> m02039s + asntyrthr_s	Transport reactions	1191.21	1000	1.19102
ASPALAARGr	Metabolism (Formation/Degradation) of AspAlaArg	2 m02040c + aspalaarg_c -> m01307c + m01365c + m01370c	Peptide metabolism	1000	1000	1
ASPALAARGr_REV	Metabolism (Formation/Degradation) of AspAlaArg (reversible)	m01307c + m01365c + m01370c -> 2 m02040c + aspalaarg_c	Peptide metabolism	1000	1000	1
ASPALAARGt	Transport of AspAlaArg, Extracellular	m02039s + aspalaarg_s -> m02039c + aspalaarg_c	Transport reactions	1191.21	1000	1.19102
ASPALAARGt_REV	Transport of AspAlaArg, Extracellular (reversible)	m02039c + aspalaarg_c -> m02039s + aspalaarg_s	Transport reactions	1191.21	1000	1.19102
ASPASNGLUr	Metabolism (Formation/Degradation) of AspAsnGlu	2 m02040c + aspasnglu_c -> m01369c + m01370c + m01974c	Peptide metabolism	1000	1000	1
ASPASNGLUr_REV	Metabolism (Formation/Degradation) of AspAsnGlu (reversible)	m01369c + m01370c + m01974c -> 2 m02040c + aspasnglu_c	Peptide metabolism	1000	1000	1
ASPASNGLUt	Transport of AspAsnGlu, Extracellular	m02039s + aspasnglu_s -> m02039c + aspasnglu_c	Transport reactions	1191.21	1000	1.19102
ASPASNGLUt_REV	Transport of AspAsnGlu, Extracellular (reversible)	m02039c + aspasnglu_c -> m02039s + aspasnglu_s	Transport reactions	1191.21	1000	1.19102
ASPDTDe	D-Aspartate Transport, Extracellular	m01641c -> m01641s	Transport reactions	1000	1000	1
ASPDTDe_REV	D-Aspartate Transport, Extracellular (reversible)	m01641s -> m01641c	Transport reactions	1000	1000	1
ASPGLUPROr	Metabolism (Formation/Degradation) of AspGluPro	2 m02040c + aspglupro_c -> m01370c + m01974c + m02770c	Peptide metabolism	1000	1000	1
ASPGLUPROr_REV	Metabolism (Formation/Degradation) of AspGluPro (reversible)	m01370c + m01974c + m02770c -> 2 m02040c + aspglupro_c	Peptide metabolism	1000	1000	1
ASPGLUPROt	Transport of AspGluPro, Extracellular	m02039s + aspglupro_s -> m02039c + aspglupro_c	Transport reactions	1191.21	1000	1.19102
ASPGLUPROt_REV	Transport of AspGluPro, Extracellular (reversible)	m02039c + aspglupro_c -> m02039s + aspglupro_s	Transport reactions	1191.21	1000	1.19102
ASPGLUTRPr	Metabolism (Formation/Degradation) of AspGluTrp	2 m02040c + aspglutrp_c -> m01370c + m01974c + m03089c	Peptide metabolism	1000	1000	1
ASPGLUTRPr_REV	Metabolism (Formation/Degradation) of AspGluTrp (reversible)	m01370c + m01974c + m03089c -> 2 m02040c + aspglutrp_c	Peptide metabolism	1000	1000	1
ASPGLUTRPt	Transport of AspGluTrp, Extracellular	m02039s + aspglutrp_s -> m02039c + aspglutrp_c	Transport reactions	1191.21	1000	1.19102
ASPGLUTRPt_REV	Transport of AspGluTrp, Extracellular (reversible)	m02039c + aspglutrp_c -> m02039s + aspglutrp_s	Transport reactions	1191.21	1000	1.19102
ASPGLUr	Metabolism (Formation/Degradation) of AspGlu	m02040c + aspglu_c -> m01370c + m01974c	Peptide metabolism	1000	1000	1
ASPGLUr_REV	Metabolism (Formation/Degradation) of AspGlu (reversible)	m01370c + m01974c -> m02040c + aspglu_c	Peptide metabolism	1000	1000	1
ASPGLUt	Transport of AspGlu, Extracellular	m02039s + aspglu_s -> m02039c + aspglu_c	Transport reactions	1191.21	1000	1.19102
ASPGLUt_REV	Transport of AspGlu, Extracellular (reversible)	m02039c + aspglu_c -> m02039s + aspglu_s	Transport reactions	1191.21	1000	1.19102
ASPHISCYSr	Metabolism (Formation/Degradation) of AspHisCys	2 m02040c + asphiscys_c -> m01370c + m01628c + m02125c	Peptide metabolism	1000	1000	1
ASPHISCYSr_REV	Metabolism (Formation/Degradation) of AspHisCys (reversible)	m01370c + m01628c + m02125c -> 2 m02040c + asphiscys_c	Peptide metabolism	1000	1000	1
ASPHISCYSt	Transport of AspHisCys, Extracellular	m02039s + asphiscys_s -> m02039c + asphiscys_c	Transport reactions	1191.21	1000	1.19102
ASPHISCYSt_REV	Transport of AspHisCys, Extracellular (reversible)	m02039c + asphiscys_c -> m02039s + asphiscys_s	Transport reactions	1191.21	1000	1.19102
ASPHISPROr	Metabolism (Formation/Degradation) of AspHisPro	2 m02040c + asphispro_c -> m01370c + m02125c + m02770c	Peptide metabolism	1000	1000	1
ASPHISPROr_REV	Metabolism (Formation/Degradation) of AspHisPro (reversible)	m01370c + m02125c + m02770c -> 2 m02040c + asphispro_c	Peptide metabolism	1000	1000	1
ASPHISPROt	Transport of AspHisPro, Extracellular	m02039s + asphispro_s -> m02039c + asphispro_c	Transport reactions	1191.21	1000	1.19102
ASPHISPROt_REV	Transport of AspHisPro, Extracellular (reversible)	m02039c + asphispro_c -> m02039s + asphispro_s	Transport reactions	1191.21	1000	1.19102
ASPLYSGLUr	Metabolism (Formation/Degradation) of AspLysGlu	2 m02040c + asplysglu_c -> m01370c + m01974c + m02426c	Peptide metabolism	1000	1000	1
ASPLYSGLUr_REV	Metabolism (Formation/Degradation) of AspLysGlu (reversible)	m01370c + m01974c + m02426c -> 2 m02040c + asplysglu_c	Peptide metabolism	1000	1000	1
ASPLYSGLUt	Transport of AspLysGlu, Extracellular	m02039s + asplysglu_s -> m02039c + asplysglu_c	Transport reactions	1191.21	1000	1.19102
ASPLYSGLUt_REV	Transport of AspLysGlu, Extracellular (reversible)	m02039c + asplysglu_c -> m02039s + asplysglu_s	Transport reactions	1191.21	1000	1.19102
ASPLYSHISr	Metabolism (Formation/Degradation) of AspLysHis	2 m02040c + asplyshis_c -> m01370c + m02125c + m02426c	Peptide metabolism	1000	1000	1
ASPLYSHISr_REV	Metabolism (Formation/Degradation) of AspLysHis (reversible)	m01370c + m02125c + m02426c -> 2 m02040c + asplyshis_c	Peptide metabolism	1000	1000	1
ASPLYSHISt	Transport of AspLysHis, Extracellular	m02039s + asplyshis_s -> m02039c + asplyshis_c	Transport reactions	1191.21	1000	1.19102
ASPLYSHISt_REV	Transport of AspLysHis, Extracellular (reversible)	m02039c + asplyshis_c -> m02039s + asplyshis_s	Transport reactions	1191.21	1000	1.19102
ASPMETASPr	Metabolism (Formation/Degradation) of AspMetAsp	2 m02040c + aspmetasp_c -> 2 m01370c + m02471c	Peptide metabolism	1000	1000	1
ASPMETASPr_REV	Metabolism (Formation/Degradation) of AspMetAsp (reversible)	2 m01370c + m02471c -> 2 m02040c + aspmetasp_c	Peptide metabolism	1000	1000	1
ASPMETASPt	Transport of AspMetAsp, Extracellular	m02039s + aspmetasp_s -> m02039c + aspmetasp_c	Transport reactions	1191.21	1000	1.19102
ASPMETASPt_REV	Transport of AspMetAsp, Extracellular (reversible)	m02039c + aspmetasp_c -> m02039s + aspmetasp_s	Transport reactions	1191.21	1000	1.19102
ASPPROASCT1	Aspartate Intake by System Asct-1 Transporter	m01370s + m02519s + m02770c -> m01370c + m02519c + m02770s	Transport reactions	318.925	1000	0.319606
ASPPROLYSr	Metabolism (Formation/Degradation) of AspProLys	2 m02040c + aspprolys_c -> m01370c + m02426c + m02770c	Peptide metabolism	1000	1000	1
ASPPROLYSr_REV	Metabolism (Formation/Degradation) of AspProLys (reversible)	m01370c + m02426c + m02770c -> 2 m02040c + aspprolys_c	Peptide metabolism	1000	1000	1
ASPPROLYSt	Transport of AspProLys, Extracellular	m02039s + aspprolys_s -> m02039c + aspprolys_c	Transport reactions	1191.21	1000	1.19102
ASPPROLYSt_REV	Transport of AspProLys, Extracellular (reversible)	m02039c + aspprolys_c -> m02039s + aspprolys_s	Transport reactions	1191.21	1000	1.19102
ASPVALASNr	Metabolism (Formation/Degradation) of AspValAsn	2 m02040c + aspvalasn_c -> m01369c + m01370c + m03135c	Peptide metabolism	1000	1000	1
ASPVALASNr_REV	Metabolism (Formation/Degradation) of AspValAsn (reversible)	m01369c + m01370c + m03135c -> 2 m02040c + aspvalasn_c	Peptide metabolism	1000	1000	1
ASPVALASNt	Transport of AspValAsn, Extracellular	m02039s + aspvalasn_s -> m02039c + aspvalasn_c	Transport reactions	1191.21	1000	1.19102
ASPVALASNt_REV	Transport of AspValAsn, Extracellular (reversible)	m02039c + aspvalasn_c -> m02039s + aspvalasn_s	Transport reactions	1191.21	1000	1.19102
ATPaselNo1	V-Type ATPase, H+ Transporting, Lysosomal (No1)	pmet_ATPasel + 2.1368e-06 prot_O15342 + 2.1368e-06 prot_P27449 + 2.1368e-06 prot_Q8N8Y2 + 2.1368e-06 prot_Q99437 + 2.1368e-06 prot_Q9HBG4 -> m01285c + m02039l + m02751c	Transport reactions	259.887	1000	0.260626
ATPaselNo10	V-Type ATPase, H+ Transporting, Lysosomal (No10)	pmet_ATPasel + 2.1368e-06 prot_O75348 + 2.1368e-06 prot_P21281 + 2.1368e-06 prot_P38606 + 2.1368e-06 prot_Q16864 + 2.1368e-06 prot_Q96A05 + 2.1368e-06 prot_Q9UI12 + 2.1368e-06 prot_Q9Y5K8 + 2.1368e-06 prot_Q8NEY4 -> m01285c + m02039l + m02751c	Transport reactions	259.887	1000	0.260626
ATPaselNo11	V-Type ATPase, H+ Transporting, Lysosomal (No11)	pmet_ATPasel + 2.1368e-06 prot_O75348 + 2.1368e-06 prot_P21281 + 2.1368e-06 prot_P21283 + 2.1368e-06 prot_P38606 + 2.1368e-06 prot_Q16864 + 2.1368e-06 prot_Q9UI12 + 2.1368e-06 prot_Q9Y5K8 + 2.1368e-06 prot_P36543 -> m01285c + m02039l + m02751c	Transport reactions	259.887	1000	0.260626
ATPaselNo12	V-Type ATPase, H+ Transporting, Lysosomal (No12)	pmet_ATPasel + 2.1368e-06 prot_O75348 + 2.1368e-06 prot_P21283 + 2.1368e-06 prot_P38606 + 2.1368e-06 prot_Q16864 + 2.1368e-06 prot_Q9UI12 + 2.1368e-06 prot_Q9Y5K8 + 2.1368e-06 prot_P15313 + 2.1368e-06 prot_P36543 -> m01285c + m02039l + m02751c	Transport reactions	259.887	1000	0.260626
ATPaselNo13	V-Type ATPase, H+ Transporting, Lysosomal (No13)	pmet_ATPasel + 2.1368e-06 prot_P21281 + 2.1368e-06 prot_P21283 + 2.1368e-06 prot_P38606 + 2.1368e-06 prot_Q16864 + 2.1368e-06 prot_Q96A05 + 2.1368e-06 prot_Q9UI12 + 2.1368e-06 prot_Q9Y5K8 + 2.1368e-06 prot_O95670 -> m01285c + m02039l + m02751c	Transport reactions	259.887	1000	0.260626
ATPaselNo14	V-Type ATPase, H+ Transporting, Lysosomal (No14)	pmet_ATPasel + 2.1368e-06 prot_P21281 + 2.1368e-06 prot_P38606 + 2.1368e-06 prot_Q16864 + 2.1368e-06 prot_Q96A05 + 2.1368e-06 prot_Q9UI12 + 2.1368e-06 prot_Q9Y5K8 + 2.1368e-06 prot_Q8NEY4 + 2.1368e-06 prot_O95670 -> m01285c + m02039l + m02751c	Transport reactions	259.887	1000	0.260626
ATPaselNo15	V-Type ATPase, H+ Transporting, Lysosomal (No15)	pmet_ATPasel + 2.1368e-06 prot_P21281 + 2.1368e-06 prot_P21283 + 2.1368e-06 prot_P38606 + 2.1368e-06 prot_Q16864 + 2.1368e-06 prot_Q9UI12 + 2.1368e-06 prot_Q9Y5K8 + 2.1368e-06 prot_P36543 + 2.1368e-06 prot_O95670 -> m01285c + m02039l + m02751c	Transport reactions	259.887	1000	0.260626
ATPaselNo16	V-Type ATPase, H+ Transporting, Lysosomal (No16)	pmet_ATPasel + 2.1368e-06 prot_P21283 + 2.1368e-06 prot_P38606 + 2.1368e-06 prot_Q16864 + 2.1368e-06 prot_Q9UI12 + 2.1368e-06 prot_Q9Y5K8 + 2.1368e-06 prot_P15313 + 2.1368e-06 prot_P36543 + 2.1368e-06 prot_Q96LB4 -> m01285c + m02039l + m02751c	Transport reactions	155.987	1000	0.15683
ATPaselNo17	V-Type ATPase, H+ Transporting, Lysosomal (No17)	pmet_ATPasel + 2.1368e-06 prot_P21281 + 2.1368e-06 prot_P38606 + 2.1368e-06 prot_Q16864 + 2.1368e-06 prot_Q96A05 + 2.1368e-06 prot_Q9UI12 + 2.1368e-06 prot_Q9Y5K8 + 2.1368e-06 prot_Q8NEY4 + 2.1368e-06 prot_Q96LB4 -> m01285c + m02039l + m02751c	Transport reactions	155.987	1000	0.15683
ATPaselNo18	V-Type ATPase, H+ Transporting, Lysosomal (No18)	pmet_ATPasel + 2.1368e-06 prot_P38606 + 2.1368e-06 prot_Q16864 + 2.1368e-06 prot_Q9UI12 + 2.1368e-06 prot_Q9Y5K8 + 2.1368e-06 prot_P15313 + 2.1368e-06 prot_Q8NEY4 + 2.1368e-06 prot_P36543 + 2.1368e-06 prot_O95670 -> m01285c + m02039l + m02751c	Transport reactions	259.887	1000	0.260626
ATPaselNo19	V-Type ATPase, H+ Transporting, Lysosomal (No19)	pmet_ATPasel + 2.1368e-06 prot_P38606 + 2.1368e-06 prot_Q16864 + 2.1368e-06 prot_Q96A05 + 2.1368e-06 prot_Q9UI12 + 2.1368e-06 prot_Q9Y5K8 + 2.1368e-06 prot_P15313 + 2.1368e-06 prot_Q8NEY4 + 2.1368e-06 prot_O95670 -> m01285c + m02039l + m02751c	Transport reactions	259.887	1000	0.260626
ATPaselNo2	V-Type ATPase, H+ Transporting, Lysosomal (No2)	pmet_ATPasel + 2.1368e-06 prot_O15342 + 2.1368e-06 prot_P27449 + 2.1368e-06 prot_Q8N8Y2 + 2.1368e-06 prot_Q99437 + 2.1368e-06 prot_Q9Y487 -> m01285c + m02039l + m02751c	Transport reactions	259.887	1000	0.260626
ATPaselNo20	V-Type ATPase, H+ Transporting, Lysosomal (No20)	pmet_ATPasel + 2.1368e-06 prot_P21283 + 2.1368e-06 prot_P38606 + 2.1368e-06 prot_Q16864 + 2.1368e-06 prot_Q9UI12 + 2.1368e-06 prot_Q9Y5K8 + 2.1368e-06 prot_P15313 + 2.1368e-06 prot_P36543 + 2.1368e-06 prot_O95670 -> m01285c + m02039l + m02751c	Transport reactions	259.887	1000	0.260626
ATPaselNo21	V-Type ATPase, H+ Transporting, Lysosomal (No21)	pmet_ATPasel + 2.1368e-06 prot_P21281 + 2.1368e-06 prot_P21283 + 2.1368e-06 prot_P38606 + 2.1368e-06 prot_Q16864 + 2.1368e-06 prot_Q96A05 + 2.1368e-06 prot_Q9UI12 + 2.1368e-06 prot_Q9Y5K8 + 2.1368e-06 prot_Q96LB4 -> m01285c + m02039l + m02751c	Transport reactions	155.987	1000	0.15683
ATPaselNo22	V-Type ATPase, H+ Transporting, Lysosomal (No22)	pmet_ATPasel + 2.1368e-06 prot_P21281 + 2.1368e-06 prot_P21283 + 2.1368e-06 prot_P38606 + 2.1368e-06 prot_Q16864 + 2.1368e-06 prot_Q9UI12 + 2.1368e-06 prot_Q9Y5K8 + 2.1368e-06 prot_P36543 + 2.1368e-06 prot_Q96LB4 -> m01285c + m02039l + m02751c	Transport reactions	155.987	1000	0.15683
ATPaselNo23	V-Type ATPase, H+ Transporting, Lysosomal (No23)	pmet_ATPasel + 2.1368e-06 prot_P21283 + 2.1368e-06 prot_P38606 + 2.1368e-06 prot_Q16864 + 2.1368e-06 prot_Q96A05 + 2.1368e-06 prot_Q9UI12 + 2.1368e-06 prot_Q9Y5K8 + 2.1368e-06 prot_P15313 + 2.1368e-06 prot_O95670 -> m01285c + m02039l + m02751c	Transport reactions	259.887	1000	0.260626
ATPaselNo24	V-Type ATPase, H+ Transporting, Lysosomal (No24)	pmet_ATPasel + 2.1368e-06 prot_P21283 + 2.1368e-06 prot_P38606 + 2.1368e-06 prot_Q16864 + 2.1368e-06 prot_Q96A05 + 2.1368e-06 prot_Q9UI12 + 2.1368e-06 prot_Q9Y5K8 + 2.1368e-06 prot_P15313 + 2.1368e-06 prot_Q96LB4 -> m01285c + m02039l + m02751c	Transport reactions	155.987	1000	0.15683
ATPaselNo25	V-Type ATPase, H+ Transporting, Lysosomal (No25)	pmet_ATPasel + 2.1368e-06 prot_P21281 + 2.1368e-06 prot_P38606 + 2.1368e-06 prot_Q16864 + 2.1368e-06 prot_Q9UI12 + 2.1368e-06 prot_Q9Y5K8 + 2.1368e-06 prot_Q8NEY4 + 2.1368e-06 prot_P36543 + 2.1368e-06 prot_Q96LB4 -> m01285c + m02039l + m02751c	Transport reactions	155.987	1000	0.15683
ATPaselNo26	V-Type ATPase, H+ Transporting, Lysosomal (No26)	pmet_ATPasel + 2.1368e-06 prot_P21281 + 2.1368e-06 prot_P38606 + 2.1368e-06 prot_Q16864 + 2.1368e-06 prot_Q9UI12 + 2.1368e-06 prot_Q9Y5K8 + 2.1368e-06 prot_Q8NEY4 + 2.1368e-06 prot_P36543 + 2.1368e-06 prot_O95670 -> m01285c + m02039l + m02751c	Transport reactions	259.887	1000	0.260626
ATPaselNo27	V-Type ATPase, H+ Transporting, Lysosomal (No27)	pmet_ATPasel + 2.1368e-06 prot_P38606 + 2.1368e-06 prot_Q16864 + 2.1368e-06 prot_Q9UI12 + 2.1368e-06 prot_Q9Y5K8 + 2.1368e-06 prot_P15313 + 2.1368e-06 prot_Q8NEY4 + 2.1368e-06 prot_P36543 + 2.1368e-06 prot_Q96LB4 -> m01285c + m02039l + m02751c	Transport reactions	155.987	1000	0.15683
ATPaselNo28	V-Type ATPase, H+ Transporting, Lysosomal (No28)	pmet_ATPasel + 2.1368e-06 prot_P38606 + 2.1368e-06 prot_Q16864 + 2.1368e-06 prot_Q96A05 + 2.1368e-06 prot_Q9UI12 + 2.1368e-06 prot_Q9Y5K8 + 2.1368e-06 prot_P15313 + 2.1368e-06 prot_Q8NEY4 + 2.1368e-06 prot_Q96LB4 -> m01285c + m02039l + m02751c	Transport reactions	155.987	1000	0.15683
ATPaselNo29	V-Type ATPase, H+ Transporting, Lysosomal (No29)	pmet_ATPasel + 2.1368e-06 prot_O75348 + 2.1368e-06 prot_P38606 + 2.1368e-06 prot_Q16864 + 2.1368e-06 prot_Q96A05 + 2.1368e-06 prot_Q9UI12 + 2.1368e-06 prot_Q9Y5K8 + 2.1368e-06 prot_P15313 + 2.1368e-06 prot_Q8NEY4 -> m01285c + m02039l + m02751c	Transport reactions	259.887	1000	0.260626
ATPaselNo3	V-Type ATPase, H+ Transporting, Lysosomal (No3)	pmet_ATPasel + 2.1368e-06 prot_O15342 + 2.1368e-06 prot_P27449 + 2.1368e-06 prot_Q99437 + 2.1368e-06 prot_Q9HBG4 + 2.1368e-06 prot_P61421 -> m01285c + m02039l + m02751c	Transport reactions	259.887	1000	0.260626
ATPaselNo30	V-Type ATPase, H+ Transporting, Lysosomal (No30)	pmet_ATPasel + 2.1368e-06 prot_O75348 + 2.1368e-06 prot_P38606 + 2.1368e-06 prot_Q16864 + 2.1368e-06 prot_Q9UI12 + 2.1368e-06 prot_Q9Y5K8 + 2.1368e-06 prot_P15313 + 2.1368e-06 prot_Q8NEY4 + 2.1368e-06 prot_P36543 -> m01285c + m02039l + m02751c	Transport reactions	259.887	1000	0.260626
ATPaselNo31	V-Type ATPase, H+ Transporting, Lysosomal (No31)	pmet_ATPasel + 2.1368e-06 prot_O75348 + 2.1368e-06 prot_P21281 + 2.1368e-06 prot_P38606 + 2.1368e-06 prot_Q16864 + 2.1368e-06 prot_Q9UI12 + 2.1368e-06 prot_Q9Y5K8 + 2.1368e-06 prot_Q8NEY4 + 2.1368e-06 prot_P36543 -> m01285c + m02039l + m02751c	Transport reactions	259.887	1000	0.260626
ATPaselNo4	V-Type ATPase, H+ Transporting, Lysosomal (No4)	pmet_ATPasel + 2.1368e-06 prot_O15342 + 2.1368e-06 prot_P27449 + 2.1368e-06 prot_Q8N8Y2 + 2.1368e-06 prot_Q99437 + 2.1368e-06 prot_Q93050 -> m01285c + m02039l + m02751c	Transport reactions	259.887	1000	0.260626
ATPaselNo5	V-Type ATPase, H+ Transporting, Lysosomal (No5)	pmet_ATPasel + 2.1368e-06 prot_O15342 + 2.1368e-06 prot_P27449 + 2.1368e-06 prot_Q99437 + 2.1368e-06 prot_P61421 + 2.1368e-06 prot_Q93050 -> m01285c + m02039l + m02751c	Transport reactions	259.887	1000	0.260626
ATPaselNo6	V-Type ATPase, H+ Transporting, Lysosomal (No6)	pmet_ATPasel + 2.1368e-06 prot_O15342 + 2.1368e-06 prot_P27449 + 2.1368e-06 prot_Q99437 + 2.1368e-06 prot_P61421 + 2.1368e-06 prot_Q13488 -> m01285c + m02039l + m02751c	Transport reactions	259.887	1000	0.260626
ATPaselNo7	V-Type ATPase, H+ Transporting, Lysosomal (No7)	pmet_ATPasel + 2.1368e-06 prot_O15342 + 2.1368e-06 prot_P27449 + 2.1368e-06 prot_Q99437 + 2.1368e-06 prot_Q9Y487 + 2.1368e-06 prot_P61421 -> m01285c + m02039l + m02751c	Transport reactions	259.887	1000	0.260626
ATPaselNo8	V-Type ATPase, H+ Transporting, Lysosomal (No8)	pmet_ATPasel + 2.1368e-06 prot_O15342 + 2.1368e-06 prot_P27449 + 2.1368e-06 prot_Q8N8Y2 + 2.1368e-06 prot_Q99437 + 2.1368e-06 prot_Q13488 + 2.1368e-06 prot_O75348 + 2.1368e-06 prot_P21281 + 2.1368e-06 prot_P21283 + 2.1368e-06 prot_P38606 + 2.1368e-06 prot_Q16864 + 2.1368e-06 prot_Q96A05 + 2.1368e-06 prot_Q9UI12 + 2.1368e-06 prot_Q9Y5K8 -> m01285c + m02039l + m02751c	Transport reactions	259.887	1000	0.260626
ATPaselNo9	V-Type ATPase, H+ Transporting, Lysosomal (No9)	pmet_ATPasel + 2.1368e-06 prot_O75348 + 2.1368e-06 prot_P21283 + 2.1368e-06 prot_P38606 + 2.1368e-06 prot_Q16864 + 2.1368e-06 prot_Q96A05 + 2.1368e-06 prot_Q9UI12 + 2.1368e-06 prot_Q9Y5K8 + 2.1368e-06 prot_P15313 -> m01285c + m02039l + m02751c	Transport reactions	259.887	1000	0.260626
ATPtg	ADP/ATP Transporter, Golgi	m01285g + m01371c -> m01285c + m01371g	Transport reactions	1000	1000	1
ATVACIDMCTtu	uptake of atorvastatin by enterocytes by MCT1	m02039s + atvacid_s -> m02039c + atvacid_c	Drug metabolism	965.483	1000	0.965518
ATVACIDMCTtu_REV	uptake of atorvastatin by enterocytes by MCT1 (reversible)	m02039c + atvacid_c -> m02039s + atvacid_s	Drug metabolism	965.483	1000	0.965518
ATVACIDOATPtu	uptake of atorvastatin by enterocytes	m02046c + atvacid_s -> m02046s + atvacid_c	Drug metabolism	636.499	1000	0.636862
ATVACIDOATPtu_REV	uptake of atorvastatin by enterocytes (reversible)	m02046s + atvacid_c -> m02046c + atvacid_s	Drug metabolism	636.499	1000	0.636862
ATVACIDhcNo1	conversion of lactone to acid form of atorvastatin in hepatocytes (No1)	m02040c + atvlac_c + 2.2011e-08 prot_Q15166 -> m02039c + atvacid_c	Drug metabolism	3000	1000	2.998
ATVACIDhr	spontaneous conversion of atorvastatin ether glucuronide (G1) to atorvastatin-acid	2 m02040r + atvethgluc_r -> 2 m01973r + atvacid_r	Drug metabolism	765.499	1000	0.765734
ATVACIDitr	ATVACIDitr	atvacid_c -> atvacid_r	Drug metabolism	1000	1000	1
ATVACIDitr_REV	ATVACIDitr (reversible)	atvacid_r -> atvacid_c	Drug metabolism	1000	1000	1
ATVACIDtdu	passive diffusion of atorvastatin into enterocytes	atvacid_s -> atvacid_c	Drug metabolism	1000	1000	1
ATVACIDtdu_REV	passive diffusion of atorvastatin into enterocytes (reversible)	atvacid_c -> atvacid_s	Drug metabolism	1000	1000	1
ATVACIDtuNo1	efflux of atorvastatin acid by P-gp from the enterocytes into lumen (No1)	m01371c + m02040c + atvacid_c + 9.4162e-05 prot_P08183 -> m01285c + m02039c + m02751c + atvacid_s	Drug metabolism	92.5865	1000	0.093493
ATVACYLGLUChcNo1	glucuronidation of atorvastatin to atorvastatin acyl glucuronide (G2) in hepatocytes (No1)	5.0875e-08 prot_P16662 + pmet_ATVACYLGLUChc -> m03106r + atvacylgluc_r	Drug metabolism	1000	1000	1
ATVACYLGLUChcNo2	glucuronidation of atorvastatin to atorvastatin acyl glucuronide (G2) in hepatocytes (No2)	5.0875e-08 prot_P22309 + pmet_ATVACYLGLUChc -> m03106r + atvacylgluc_r	Drug metabolism	1000	1000	1
ATVACYLGLUChcNo3	glucuronidation of atorvastatin to atorvastatin acyl glucuronide (G2) in hepatocytes (No3)	5.0875e-08 prot_Q9HAW9 + pmet_ATVACYLGLUChc -> m03106r + atvacylgluc_r	Drug metabolism	1000	1000	1
ATVACYLGLUChcNo4	glucuronidation of atorvastatin to atorvastatin acyl glucuronide (G2) in hepatocytes (No4)	5.0875e-08 prot_P35503 + pmet_ATVACYLGLUChc -> m03106r + atvacylgluc_r	Drug metabolism	1000	1000	1
ATVACYLGLUChcNo5	glucuronidation of atorvastatin to atorvastatin acyl glucuronide (G2) in hepatocytes (No5)	5.0875e-08 prot_P22310 + pmet_ATVACYLGLUChc -> m03106r + atvacylgluc_r	Drug metabolism	1000	1000	1
ATVETHGLUChcNo1	glucuronidation of atorvastatin to atorvastatin ether glucuronide (G1) in hepatocytes (No1)	5.0875e-08 prot_O60656 + pmet_ATVETHGLUChc -> 2 m02039r + 2 m03106r + atvethgluc_r	Drug metabolism	765.499	1000	0.765734
ATVETHGLUChcNo2	glucuronidation of atorvastatin to atorvastatin ether glucuronide (G1) in hepatocytes (No2)	5.0875e-08 prot_P35503 + pmet_ATVETHGLUChc -> 2 m02039r + 2 m03106r + atvethgluc_r	Drug metabolism	765.499	1000	0.765734
ATVETHGLUChcNo3	glucuronidation of atorvastatin to atorvastatin ether glucuronide (G1) in hepatocytes (No3)	5.0875e-08 prot_P22310 + pmet_ATVETHGLUChc -> 2 m02039r + 2 m03106r + atvethgluc_r	Drug metabolism	765.499	1000	0.765734
ATVLACGLCURhcNo1	glucuronidation of atorvastatin lactone to atorvastain lactone ether glucuronide (G3) in hepatocytes (No1)	5.0875e-08 prot_P16662 + pmet_ATVLACGLCURhc -> m02039r + m03106r + atvlacgluc_r	Drug metabolism	1000	1000	1
ATVLACGLCURhcNo2	glucuronidation of atorvastatin lactone to atorvastain lactone ether glucuronide (G3) in hepatocytes (No2)	5.0875e-08 prot_P22309 + pmet_ATVLACGLCURhc -> m02039r + m03106r + atvlacgluc_r	Drug metabolism	1000	1000	1
ATVLACGLCURhcNo3	glucuronidation of atorvastatin lactone to atorvastain lactone ether glucuronide (G3) in hepatocytes (No3)	5.0875e-08 prot_Q9HAW9 + pmet_ATVLACGLCURhc -> m02039r + m03106r + atvlacgluc_r	Drug metabolism	1000	1000	1
ATVLACGLCURhcNo4	glucuronidation of atorvastatin lactone to atorvastain lactone ether glucuronide (G3) in hepatocytes (No4)	5.0875e-08 prot_P35503 + pmet_ATVLACGLCURhc -> m02039r + m03106r + atvlacgluc_r	Drug metabolism	1000	1000	1
ATVLACGLCURhcNo5	glucuronidation of atorvastatin lactone to atorvastain lactone ether glucuronide (G3) in hepatocytes (No5)	5.0875e-08 prot_P22310 + pmet_ATVLACGLCURhc -> m02039r + m03106r + atvlacgluc_r	Drug metabolism	1000	1000	1
ATVLACThc	uptake of atorvastatin-lactone into hepatocytes	m02046c + atvlac_s -> m02046s + atvlac_c	Drug metabolism	1000	1000	1
ATVLACThc_REV	uptake of atorvastatin-lactone into hepatocytes (reversible)	m02046s + atvlac_c -> m02046c + atvlac_s	Drug metabolism	1000	1000	1
ATVLACh2r	spontaneous conversion of glucuronide (G2) to lactone form of atorvastatin	atvacylgluc_r -> m01973r + atvlac_r	Drug metabolism	1000	1000	1
ATVLAChc	lactonization of atorvastatin in hepatocytes	m01371c + atvacid_c -> m01334c + m02759c + atvlac_c	Drug metabolism	1000	1000	1
ATVLAChr	spontaneous conversion of atorvastain lactone ether glucuronide (G3) to atorvastatin-lactone in hepatocytes	m02040r + atvlacgluc_r -> m01973r + atvlac_r	Drug metabolism	1000	1000	1
ATVLACitr	ATVLACitr	atvlac_c -> atvlac_r	Drug metabolism	1000	1000	1
ATVLACitr_REV	ATVLACitr (reversible)	atvlac_r -> atvlac_c	Drug metabolism	1000	1000	1
ATVLACtdhc	passive diffusion of atorvastatin lactone into hepatocytes	atvlac_s -> atvlac_c	Drug metabolism	1000	1000	1
ATVLACtdhc_REV	passive diffusion of atorvastatin lactone into hepatocytes (reversible)	atvlac_c -> atvlac_s	Drug metabolism	1000	1000	1
ATVLACtuNo1	efflux of atorvastatin lactone by P-gp from the enterocytes into lumen (No1)	m01371c + m02040c + atvlac_c + 9.4162e-05 prot_P08183 -> m01285c + m02039c + m02751c + atvlac_s	Drug metabolism	92.5865	1000	0.093493
A_MANASENo1	Alpha-Mannosidase (No1)	2 m02040c + m00141c + 6.2704e-07 prot_Q9NTJ4 -> 2 m02453c + m01382c	N-glycan metabolism	0	0	1
Am19CStev	efflux of AM19-cyclosporine into hepatic vein	am19cs_c -> am19cs_s	Drug metabolism	1000	1000	1
Am19CStev_REV	efflux of AM19-cyclosporine into hepatic vein (reversible)	am19cs_s -> am19cs_c	Drug metabolism	1000	1000	1
Am1CSAteb	efflux of AM1-cyclosporine into bile	m01371c + m02040c + am1csa_c -> m01285c + m02039c + m02751c + am1csa_s	Drug metabolism	1000	1000	1
B3GNT312gNo1	UDP-GlcNac:Betagal Beta-1, 3-N-Acetylglucosaminyltransferase 3, Golgi Apparatus (No1)	m02593g + m03107g + 5.4616e-08 prot_Q9Y2A9 -> m02039g + m02594g + m03106g	Blood group biosynthesis	205.773	222.222	0.926311
B3GNT314gNo1	UDP-GlcNac:Betagal Beta-1, 3-N-Acetylglucosaminyltransferase 3, Golgi Apparatus (No1)	m01880g + m03107g + 5.4616e-08 prot_Q9Y2A9 -> m02039g + m03106g + galacglcgalacglcgal14acglcgalgluside_hs_g	Blood group biosynthesis	102.887	111.111	0.926639
BAAT1xNo1	Bile Acid Coenzyme A: Amino Acid N-Acyltransferase (No1)	m01514p + m01986p + 8.6806e-05 prot_Q14032 -> m01597p + m01988p	Bile acid biosynthesis	1000	1000	1
BAAT3xNo1	Bile Acid Coenzyme A: Amino Acid N-Acyltransferase (No1)	m01986p + dgcholcoa_p + 8.6806e-05 prot_Q14032 -> m01597p + m01987p	Bile acid biosynthesis	1000	1000	1
BAAT4xNo1	Bile Acid Coenzyme A: Amino Acid N-Acyltransferase (No1)	m01434p + m01986p + 8.6806e-05 prot_Q14032 -> m01597p + m01987p	Bile acid biosynthesis	1000	1000	1
BACCLmNo1	Biotin-[Acetyl Coenzyme A-Carboxylase] Ligase, Mitochondrial (No1)	m01371m + m02039m + m01401m + 1.7361e-05 prot_P50747 -> m02759m + m01402m	Biotin metabolism	1000	1000	1
BALABETAtc2	Transport of 3-Ureidopropionate	m02039s + m00923s -> m00923c + m02039c	Transport reactions	1000	1000	1
BALABETAtc2_REV	Transport of 3-Ureidopropionate (reversible)	m00923c + m02039c -> m02039s + m00923s	Transport reactions	1000	1000	1
BALAPAT1tc	Transport of Beta Alanine by Pat1 in Renal And Intestinal Cells	m01383s + m02039s -> m01383c + m02039c	Transport reactions	332.463	1000	0.33313
BALAPAT1tc2	Transport of 3-Ureidopropionate	m01442s + 2 m02519s + m00923s -> m00923c + m01442c + 2 m02519c	Transport reactions	1000	1000	1
BALAPAT1tc2_REV	Transport of 3-Ureidopropionate (reversible)	m00923c + m01442c + 2 m02519c -> m01442s + 2 m02519s + m00923s	Transport reactions	1000	1000	1
BALAVECSEC	B-Alanine Secretion via Secretory Vesicle (ATP Driven)	m01371c + m01383c + m02040c -> m01285c + m01383s + m02039c + m02751c	Transport reactions	1000	1000	1
BAMPPALDOXmNo1	Beta-Aminopropion Aldehyde:NAD+ Oxidoreductase, Mitochondrial (No1)	7.9365e-05 prot_P05091 + pmet_BAMPPALDOXm -> m01383m + 2 m02039m + m02553m	Beta-alanine metabolism	0	0	1
BAMPPALDOXmNo2	Beta-Aminopropion Aldehyde:NAD+ Oxidoreductase, Mitochondrial (No2)	7.9365e-05 prot_P30837 + pmet_BAMPPALDOXm -> m01383m + 2 m02039m + m02553m	Beta-alanine metabolism	0	0	1
BAMPPALDOXmNo3	Beta-Aminopropion Aldehyde:NAD+ Oxidoreductase, Mitochondrial (No3)	1.3959e-06 prot_P30038 + pmet_BAMPPALDOXm -> m01383m + 2 m02039m + m02553m	Beta-alanine metabolism	0	0	1
BANDMT	Band Membrane Protein-Methyltransferase	m02877c + band_c -> m02039c + m02871c + bandmt_c	Miscellaneous	1000	1000	1
BANDMT_REV	Band Membrane Protein-Methyltransferase (reversible)	m02039c + m02871c + bandmt_c -> m02877c + band_c	Miscellaneous	1000	1000	1
BCRNe	Transport of 3-Hydroxy Butyryl Carnitine into Extra Cellular Space	3bcrn_c -> 3bcrn_s	Fatty acid oxidation	1000	1000	1
BETBGTtc	Betaine Transport by Bgt	m01393s + m01442s + m02519s -> m01393c + m01442c + m02519c	Transport reactions	6581.44	1000	6.57586
BETBGTtc_REV	Betaine Transport by Bgt (reversible)	m01393c + m01442c + m02519c -> m01393s + m01442s + m02519s	Transport reactions	6581.44	1000	6.57586
BGAL1eNo1	Beta-Galactosidase, Plasma Membrane (No1)	m02040s + galgluside_hs_s + 0.027778 prot_P16278 -> m01910s + m01972s	Sphingolipid metabolism	852.331	1000	0.852479
BGAL1lNo1	Beta-Galactosidase, Lysosomal (No1)	1.5632e-07 prot_P10619 + pmet_BGAL1l -> m01910l + m02011l	Sphingolipid metabolism	407.554	1000	0.408146
BGAL1lNo2	Beta-Galactosidase, Lysosomal (No2)	1.6534e-05 prot_P34059 + pmet_BGAL1l -> m01910l + m02011l	Sphingolipid metabolism	407.554	1000	0.408146
BGAL1lNo3	Beta-Galactosidase, Lysosomal (No3)	0.027778 prot_P16278 + pmet_BGAL1l -> m01910l + m02011l	Sphingolipid metabolism	407.554	1000	0.408146
BGAL1lNo4	Beta-Galactosidase, Lysosomal (No4)	pmet_BGAL1l + 1.5632e-07 prot_P17900 -> m01910l + m02011l	Sphingolipid metabolism	407.554	1000	0.408146
BGAL1lNo5	Beta-Galactosidase, Lysosomal (No5)	pmet_BGAL1l + 1.5632e-07 prot_P07602 -> m01910l + m02011l	Sphingolipid metabolism	407.554	1000	0.408146
BGAL1lNo6	Beta-Galactosidase, Lysosomal (No6)	1.2077e-05 prot_Q99519 + pmet_BGAL1l -> m01910l + m02011l	Sphingolipid metabolism	407.554	1000	0.408146
BGAL2lNo1	Beta-Galactosidase, Lysosomal (No1)	1.5632e-07 prot_P10619 + pmet_BGAL2l -> m01910l + m01905l	Sphingolipid metabolism	195.73	333.333	0.588425
BGAL2lNo2	Beta-Galactosidase, Lysosomal (No2)	1.6534e-05 prot_P34059 + pmet_BGAL2l -> m01910l + m01905l	Sphingolipid metabolism	195.73	333.333	0.588425
BGAL2lNo3	Beta-Galactosidase, Lysosomal (No3)	0.027778 prot_P16278 + pmet_BGAL2l -> m01910l + m01905l	Sphingolipid metabolism	195.73	333.333	0.588425
BGAL2lNo4	Beta-Galactosidase, Lysosomal (No4)	1.5632e-07 prot_P17900 + pmet_BGAL2l -> m01910l + m01905l	Sphingolipid metabolism	195.73	333.333	0.588425
BGAL2lNo5	Beta-Galactosidase, Lysosomal (No5)	1.5632e-07 prot_P07602 + pmet_BGAL2l -> m01910l + m01905l	Sphingolipid metabolism	195.73	333.333	0.588425
BGAL2lNo6	Beta-Galactosidase, Lysosomal (No6)	1.2077e-05 prot_Q99519 + pmet_BGAL2l -> m01910l + m01905l	Sphingolipid metabolism	195.73	333.333	0.588425
BGAL3lNo1	Beta-Galactosidase, Lysosomal (No1)	m02040l + m01943l + 0.027778 prot_P16278 -> m01910l + m01946l	Sphingolipid metabolism	589.804	1000	0.590214
BGAL4lNo1	Beta-Galactosidase Lysosomal (No1)	m02040l + m02009l + 0.027778 prot_P16278 -> m01910l + m02014l	Sphingolipid metabolism	0	0	1
BGLUGCHe	Binding of Betaglucans with Glycocholate	m01988s + bglc_s -> glgchlo_s	Dietary fiber binding	1000	1000	1
BGLUTCHLe	Binding of Betaglucans with Taurocholate	m02963s + bglc_s -> gltcho_s	Dietary fiber binding	1000	1000	1
BGLUTDECHOe	Binding of Betaglucans with Taurodeoxycholate	bglc_s + m02964s -> gltdechol_s	Dietary fiber binding	1000	1000	1
BGLYFm	Hippurate (Benzoylglycinate) Formation	m01986m + bzcoa_m -> m01597m + m02039m + m02123m	Hippurate metabolism	1000	1000	1
BGLYte	Transport of Hippurate (Benzoylglycine), Extracellular	m02123c -> m02123s	Transport reactions	1000	1000	1
BGLYte_REV	Transport of Hippurate (Benzoylglycine), Extracellular (reversible)	m02123s -> m02123c	Transport reactions	1000	1000	1
BGLYtm	Intracellular Transport for Benzoyl-Glycine	m02123m -> m02123c	Transport reactions	1000	1000	1
BGLYtm_REV	Intracellular Transport for Benzoyl-Glycine (reversible)	m02123c -> m02123m	Transport reactions	1000	1000	1
BIDGLCURrNo1	Bilirubin Di-Glucuronide Production (No1)	m01398r + m03109r + 5.0875e-08 prot_Q9HAW9 -> m01397r + m03106r	Heme degradation	1000	1000	1
BILDGLCURtr	Glucuronidated Compound Transport	m01397c -> m01397r	Transport reactions	1000	1000	1
BILDGLCURtr_REV	Glucuronidated Compound Transport (reversible)	m01397r -> m01397c	Transport reactions	1000	1000	1
BILGLCURtr	Glucuronidated Compound Transport	m01398c -> m01398r	Transport reactions	1000	1000	1
BILGLCURtr_REV	Glucuronidated Compound Transport (reversible)	m01398r -> m01398c	Transport reactions	1000	1000	1
BILIVERDt	Transport of Biliverdin	m01399c + m02519c -> m02519s + m01399s	Transport reactions	1000	1000	1
BILIVERDt_REV	Transport of Biliverdin (reversible)	m02519s + m01399s -> m01399c + m02519c	Transport reactions	1000	1000	1
BTNDmNo1	Biotinidase (Biotin), Mitochondrial (No1)	m02040m + m01400m + 1.6614e-07 prot_P43251 -> m02426m + m01401m	Biotin metabolism	1000	1000	1
BTNPLmNo1	Holocarboxylase Synthestase (Biotin Protein Ligase), Mitochondrial (No1)	m01356m + m01402m + 1.7361e-05 prot_P50747 -> m01334m + m02039m + m01357m	Biotin metabolism	1000	1000	1
BTNTe	Release of Biotin Across the Basolatral Membrane	m01401c -> m01401s	Transport reactions	1000	1000	1
BTNt2m	Biotin Reversible Transport via Proton Symport, Mitochondria	m01401c + m02039c -> m02039m + m01401m	Transport reactions	965.483	1000	0.965518
BTNt2m_REV	Biotin Reversible Transport via Proton Symport, Mitochondria (reversible)	m02039m + m01401m -> m01401c + m02039c	Transport reactions	965.483	1000	0.965518
BTNt3i	Biotin Transport via Sodium Symport	m01371c + m01401s + m02040c + m02519s -> m01285c + m01401c + m02039c + m02519c + m02751c	Transport reactions	858.611	1000	0.858753
BTNt4i	Biotin Uptake (Antiport)	m01401s + m02039c -> m01401c + m02039s	Transport reactions	1000.01	1000	1.00001
BUP2No1	Beta-Ureidopropionase (D-3-Amino-Isobutanoate Forming) (No1)	m00922c + 2 m02039c + m02040c + 0.00046296 prot_Q9UBR1 -> m01596c + m01633c + m02579c	Pyrimidine metabolism	2000	1000	1.999
BUTSMCT1	Butyrate Transport by Smct1	m01410s + m02519s -> m01410c + m02519c	Transport reactions	1000	1000	1
BUTSMCT1_REV	Butyrate Transport by Smct1 (reversible)	m01410c + m02519c -> m01410s + m02519s	Transport reactions	1000	1000	1
BUTt2m	Butyrate Mitochondrial Transport via Proton Symport, Reversible	m01410c + m02039c -> m02039m + m01410m	Transport reactions	965.483	1000	0.965518
BUTt2m_REV	Butyrate Mitochondrial Transport via Proton Symport, Reversible (reversible)	m02039m + m01410m -> m01410c + m02039c	Transport reactions	965.483	1000	0.965518
BUTt2r	Butyrate Transport via Proton Symport, Reversible	m01410s + m02039s -> m01410c + m02039c	Transport reactions	965.483	1000	0.965518
BUTt2r_REV	Butyrate Transport via Proton Symport, Reversible (reversible)	m01410c + m02039c -> m01410s + m02039s	Transport reactions	965.483	1000	0.965518
BVITEt	Beta-Tocopherol (Vit. E) Transport	bvite_s -> bvite_c	Transport reactions	0	0	1
BZCOAFm	Benzoyl Coenzyme A Formation	m01371m + m01597m + m01380m -> m01334m + m02759m + bzcoa_m	Hippurate metabolism	1000	1000	1
BZt	Benzoate Transport (Diffusion)	m01380s -> m01380c	Transport reactions	1000	1000	1
BZt_REV	Benzoate Transport (Diffusion) (reversible)	m01380c -> m01380s	Transport reactions	1000	1000	1
BZtm	Intracellular Transport of Benzoate	m01380c -> m01380m	Transport reactions	1000	1000	1
BZtm_REV	Intracellular Transport of Benzoate (reversible)	m01380m -> m01380c	Transport reactions	1000	1000	1
BZtr	Benzene Transporter, Endoplasmic Reticulum	m01380c -> m01380r	Transport reactions	1000	1000	1
BZtr_REV	Benzene Transporter, Endoplasmic Reticulum (reversible)	m01380r -> m01380c	Transport reactions	1000	1000	1
C02356t	(S)-2-Aminobutanoate	m00169c -> m00169s	Transport reactions	1000	1000	1
C02356t_REV	(S)-2-Aminobutanoate (reversible)	m00169s -> m00169c	Transport reactions	1000	1000	1
C02592tx	Transprot of Taurolithocholate, Peroxisomal	m02965c -> m02965p	Transport reactions	1000	1000	1
C02592tx_REV	Transprot of Taurolithocholate, Peroxisomal (reversible)	m02965p -> m02965c	Transport reactions	1000	1000	1
C02712te	Transport of N-Acetylmethionine, Extracellular	m02519c + m02540c -> m02519s + m02540s	Transport reactions	1799.53	1000	1.79874
C02712te_REV	Transport of N-Acetylmethionine, Extracellular (reversible)	m02519s + m02540s -> m02519c + m02540c	Transport reactions	1799.53	1000	1.79874
C02712tm	Transport of N-Acetylmethionine, Intracellular	m02540c -> m02540m	Transport reactions	1000	1000	1
C02712tm_REV	Transport of N-Acetylmethionine, Intracellular (reversible)	m02540m -> m02540c	Transport reactions	1000	1000	1
C03681teNo1	Transport of 5Alpha-Pregnane-3, 20-Dione, Extracellular (No1)	m01072c + m01371c + m02040c + 9.4162e-05 prot_P08183 -> m01285c + m02039c + m02751c + m01072s	Transport reactions	92.5865	1000	0.093493
C03990ATP	Transport of Lithocholate, Active Transport	m01371c + m02040c + m02402c -> m01285c + m02039c + m02402s + m02751c	Transport reactions	2794.01	1000	2.79222
C03990t	Transport of Lithocholate, Sodium Symport	m02402c + m02519c -> m02402s + m02519s	Transport reactions	1000	1000	1
C03990t_REV	Transport of Lithocholate, Sodium Symport (reversible)	m02402s + m02519s -> m02402c + m02519c	Transport reactions	1000	1000	1
C03990tr	Transport of Lithocholate, Intracellular	m02402r -> m02402c	Transport reactions	1000	1000	1
C03990tr_REV	Transport of Lithocholate, Intracellular (reversible)	m02402c -> m02402r	Transport reactions	1000	1000	1
C03990tx	Transport of Lithocholate, Intracellular	m02402p -> m02402c	Transport reactions	1000	1000	1
C03990tx_REV	Transport of Lithocholate, Intracellular (reversible)	m02402c -> m02402p	Transport reactions	1000	1000	1
C04483t1	Transport of Deoxycholate	m00745c + m01371c + m02040c -> m01285c + m02039c + m02751c + m00745s	Transport reactions	2794.01	1000	2.79222
C04483t2	Transport of Deoxycholate, Antiport with Bicarbonate	m00745c + m02046s -> m02046c + m00745s	Transport reactions	1000	1000	1
C04483t2_REV	Transport of Deoxycholate, Antiport with Bicarbonate (reversible)	m02046c + m00745s -> m00745c + m02046s	Transport reactions	1000	1000	1
C04717ATP	Transport of 13(S)-HPODE, Active	m00337c + m01371c + m02040c -> m01285c + m02039c + m02751c + m00337s	Transport reactions	1000	1000	1
C04717td	Transport of 13(S)-HPODE, Diffusion	m00337c -> m00337s	Transport reactions	1000	1000	1
C04717td_REV	Transport of 13(S)-HPODE, Diffusion (reversible)	m00337s -> m00337c	Transport reactions	1000	1000	1
C04805ATP	Transport of 5(S)-HETE, Active Transport	m01040c + m01371c + m02040c -> m01285c + m02039c + m02751c + m01040s	Transport reactions	1000	1000	1
C04805td	Transport of 5(S)-HETE, Diffusion	m01040c -> m01040s	Transport reactions	1000	1000	1
C04805td_REV	Transport of 5(S)-HETE, Diffusion (reversible)	m01040s -> m01040c	Transport reactions	1000	1000	1
C05298te	Transport of 2-Hydroxyestrone, Extracellular	m00650c + m01371c + m02040c -> m01285c + m02039c + m02751c + m00650s	Transport reactions	1000	1000	1
C05299teNo1	Transport of 2-Methoxyestrone, Extracellular (No1)	m00660c + m01371c + m02040c + 9.4162e-05 prot_P08183 -> m01285c + m02039c + m02751c + m00660s	Transport reactions	92.5865	1000	0.093493
C05300t	Transport of 16Alpha-Hydroxyestrone	m00400c -> m00400s	Transport reactions	1000	1000	1
C05300t_REV	Transport of 16Alpha-Hydroxyestrone (reversible)	m00400s -> m00400c	Transport reactions	1000	1000	1
C05301teNo1	Transport of 2-Hydroxyestradiol-17Beta, Extracellular (No1)	m00649c + m01371c + m02040c + 9.4162e-05 prot_P08183 -> m01285c + m02039c + m02751c + m00649s	Transport reactions	92.5865	1000	0.093493
C05302teNo1	Transport of 2-Methoxyestradiol-17Beta, Extracellular (No1)	m00659c + m01371c + m02040c + 9.4162e-05 prot_P08183 -> m01285c + m02039c + m02751c + m00659s	Transport reactions	92.5865	1000	0.093493
C05463t1	Transport of Taurodeoxycholate	m01371c + m02040c + m02964c -> m01285c + m02039c + m02751c + m02964s	Transport reactions	2224.14	1000	2.22292
C05463t2	Transport of Taurodeoxycholate, Antiport with Bicarbonate	m02046s + m02964c -> m02046c + m02964s	Transport reactions	1000	1000	1
C05463t2_REV	Transport of Taurodeoxycholate, Antiport with Bicarbonate (reversible)	m02046c + m02964s -> m02046s + m02964c	Transport reactions	1000	1000	1
C05767te	Assumed Passive Diffusion into Extracellular Space	m03125c -> m03125s	Transport reactions	1000	1000	1
C05767te_REV	Assumed Passive Diffusion into Extracellular Space (reversible)	m03125s -> m03125c	Transport reactions	1000	1000	1
C05769te	Transport by Atb Binding Cassette Transporter ABCc2 into Extracellular Space	m01371c + m01603c + m02040c -> m01285c + m01603s + m02039c + m02751c	Transport reactions	2500	1000	2.4985
C05769te3	Transport by OATP1B Carriers into Extracellular Space	m01603s + m02046c -> m01603c + m02046s	Transport reactions	1000	1000	1
C05770te	Transport by Atb Binding Cassette Transporter ABCc2 into Extracellular Space	m01371c + m01604c + m02040c -> m01285c + m01604s + m02039c + m02751c	Transport reactions	2675.61	1000	2.67394
C05770te4	Transport by OATP1B Carriers into Extracellular Space	m01604s + m02046c -> m01604c + m02046s	Transport reactions	1000	1000	1
C05953t	Transport of Prostaglandin A2, Lactate Antiport	m02403s + m02777c -> m02403c + m02777s	Transport reactions	1000	1000	1
C05953t_REV	Transport of Prostaglandin A2, Lactate Antiport (reversible)	m02403c + m02777s -> m02403s + m02777c	Transport reactions	1000	1000	1
C05953tm	Transport of Prostaglandin A2, Intracellular	m02777m -> m02777c	Transport reactions	1000	1000	1
C05953tm_REV	Transport of Prostaglandin A2, Intracellular (reversible)	m02777c -> m02777m	Transport reactions	1000	1000	1
C05953tr	Transport of Prostaglandin A2, Intracellular	m02777r -> m02777c	Transport reactions	1000	1000	1
C05953tr_REV	Transport of Prostaglandin A2, Intracellular (reversible)	m02777c -> m02777r	Transport reactions	1000	1000	1
C05957t	Transport of Prostaglandin J2, Lactate Antiport	m02403s + m02796c -> m02403c + m02796s	Transport reactions	1000	1000	1
C05957t_REV	Transport of Prostaglandin J2, Lactate Antiport (reversible)	m02403c + m02796s -> m02403s + m02796c	Transport reactions	1000	1000	1
C05957td	Transport of Prostaglandin J2, Diffusion	m02796c -> m02796s	Transport reactions	1000	1000	1
C05957td_REV	Transport of Prostaglandin J2, Diffusion (reversible)	m02796s -> m02796c	Transport reactions	1000	1000	1
C06314t	Transport of Lipoxin A4, Proton Symport	m02039c + m02395c -> m02039s + m02395s	Transport reactions	1000	1000	1
C06314t_REV	Transport of Lipoxin A4, Proton Symport (reversible)	m02039s + m02395s -> m02039c + m02395c	Transport reactions	1000	1000	1
C06315t	Transport of Lipoxin B4, Proton Symport	m02039c + m02396c -> m02039s + m02396s	Transport reactions	1000	1000	1
C06315t_REV	Transport of Lipoxin B4, Proton Symport (reversible)	m02039s + m02396s -> m02039c + m02396c	Transport reactions	1000	1000	1
C06439t	Transport of Prostaglandin E3, Lactate Antiport	m02403s + m02787c -> m02403c + m02787s	Transport reactions	1000	1000	1
C06439t_REV	Transport of Prostaglandin E3, Lactate Antiport (reversible)	m02403c + m02787s -> m02403s + m02787c	Transport reactions	1000	1000	1
C06439tn	Transport of Prostaglandin E3, Intracellular	m02787n -> m02787c	Transport reactions	1000	1000	1
C06439tn_REV	Transport of Prostaglandin E3, Intracellular (reversible)	m02787c -> m02787n	Transport reactions	1000	1000	1
C08261te	Transport of Azelaic Acid (C08261, Azelate), Extracellular	m01372c -> m01372s	Transport reactions	1000	1000	1
C08261te_REV	Transport of Azelaic Acid (C08261, Azelate), Extracellular (reversible)	m01372s -> m01372c	Transport reactions	1000	1000	1
C09642te	Facilitated Diffusion Through Uniport Oct2 into Extracellular Space	m02875c -> m02875s	Transport reactions	246.895	1000	0.247647
C09642te_REV	Facilitated Diffusion Through Uniport Oct2 into Extracellular Space (reversible)	m02875s -> m02875c	Transport reactions	246.895	1000	0.247647
C100CPT1No1	Production of Decanoylcarnitine (No1)	1.4172e-07 prot_P50416 + pmet_C100CPT1 -> m01597c + c10crn_c	Fatty acid oxidation	318.836	1000	0.319517
C100CPT1No2	Production of Decanoylcarnitine (No2)	1.4172e-07 prot_Q8TCG5 + pmet_C100CPT1 -> m01597c + c10crn_c	Fatty acid oxidation	713.757	1000	0.714043
C100CPT1No3	Production of Decanoylcarnitine (No3)	1.4172e-07 prot_Q92523 + pmet_C100CPT1 -> m01597c + c10crn_c	Fatty acid oxidation	9720.83	1000	9.71212
C100CPT1_REVNo1	Production of Decanoylcarnitine (reversible) (No1)	1.4172e-07 prot_P50416 + pmet_C100CPT1_REV -> m01650c + m02348c	Fatty acid oxidation	318.836	1000	0.319517
C100CPT1_REVNo2	Production of Decanoylcarnitine (reversible) (No2)	1.4172e-07 prot_Q8TCG5 + pmet_C100CPT1_REV -> m01650c + m02348c	Fatty acid oxidation	713.757	1000	0.714043
C100CPT1_REVNo3	Production of Decanoylcarnitine (reversible) (No3)	1.4172e-07 prot_Q92523 + pmet_C100CPT1_REV -> m01650c + m02348c	Fatty acid oxidation	9720.83	1000	9.71212
C10164te	Assumed Passive Diffusion into Extracellular Space	m02752c -> m02752s	Transport reactions	1000	1000	1
C10164te_REV	Assumed Passive Diffusion into Extracellular Space (reversible)	m02752s -> m02752c	Transport reactions	1000	1000	1
C101CPT1No1	Production of Decenoylcarnitine (No1)	1.4172e-07 prot_P50416 + pmet_C101CPT1 -> m01597c + c101crn_c	Fatty acid oxidation	318.836	1000	0.319517
C101CPT1No2	Production of Decenoylcarnitine (No2)	1.4172e-07 prot_Q8TCG5 + pmet_C101CPT1 -> m01597c + c101crn_c	Fatty acid oxidation	713.757	1000	0.714043
C101CPT1No3	Production of Decenoylcarnitine (No3)	1.4172e-07 prot_Q92523 + pmet_C101CPT1 -> m01597c + c101crn_c	Fatty acid oxidation	9720.83	1000	9.71212
C101CPT1_REVNo1	Production of Decenoylcarnitine (reversible) (No1)	1.4172e-07 prot_P50416 + pmet_C101CPT1_REV -> m02348c + c101coa_c	Fatty acid oxidation	318.836	1000	0.319517
C101CPT1_REVNo2	Production of Decenoylcarnitine (reversible) (No2)	1.4172e-07 prot_Q8TCG5 + pmet_C101CPT1_REV -> m02348c + c101coa_c	Fatty acid oxidation	713.757	1000	0.714043
C101CPT1_REVNo3	Production of Decenoylcarnitine (reversible) (No3)	1.4172e-07 prot_Q92523 + pmet_C101CPT1_REV -> m02348c + c101coa_c	Fatty acid oxidation	9720.83	1000	9.71212
C101CRNe	Transport of Decenoyl Carnitine into Extra Cellular Space	c101crn_c -> c101crn_s	Fatty acid oxidation	1000	1000	1
C101CRNtr	Transport of Decenoyl Carnitine	c101crn_s -> c101crn_c	Transport reactions	1000	1000	1
C101CRNtr_REV	Transport of Decenoyl Carnitine (reversible)	c101crn_c -> c101crn_s	Transport reactions	1000	1000	1
C102CPT1No1	Production of Decadienoylcarnitine (No1)	1.4172e-07 prot_P50416 + pmet_C102CPT1 -> m01597c + decdicrn_c	Fatty acid oxidation	318.836	1000	0.319517
C102CPT1No2	Production of Decadienoylcarnitine (No2)	1.4172e-07 prot_Q8TCG5 + pmet_C102CPT1 -> m01597c + decdicrn_c	Fatty acid oxidation	713.757	1000	0.714043
C102CPT1No3	Production of Decadienoylcarnitine (No3)	1.4172e-07 prot_Q92523 + pmet_C102CPT1 -> m01597c + decdicrn_c	Fatty acid oxidation	9720.83	1000	9.71212
C102CPT1_REVNo1	Production of Decadienoylcarnitine (reversible) (No1)	1.4172e-07 prot_P50416 + pmet_C102CPT1_REV -> m02348c + decdicoa_c	Fatty acid oxidation	318.836	1000	0.319517
C102CPT1_REVNo2	Production of Decadienoylcarnitine (reversible) (No2)	1.4172e-07 prot_Q8TCG5 + pmet_C102CPT1_REV -> m02348c + decdicoa_c	Fatty acid oxidation	713.757	1000	0.714043
C102CPT1_REVNo3	Production of Decadienoylcarnitine (reversible) (No3)	1.4172e-07 prot_Q92523 + pmet_C102CPT1_REV -> m02348c + decdicoa_c	Fatty acid oxidation	9720.83	1000	9.71212
C10CRNe	Transport of Decanoyl Carnitine into Extra Cellular Space	c10crn_c -> c10crn_s	Fatty acid oxidation	1000	1000	1
C10CRNtr	Transport of Decanoyl Carnitine	c10crn_s -> c10crn_c	Transport reactions	1000	1000	1
C10CRNtr_REV	Transport of Decanoyl Carnitine (reversible)	c10crn_c -> c10crn_s	Transport reactions	1000	1000	1
C10DCCACT	Transport of Sebacoyl Carnitine into Cytosol	c10dc_p -> c10dc_c	Fatty acid oxidation	445.117	1000	0.445672
C10DCCACT_REV	Transport of Sebacoyl Carnitine into Cytosol (reversible)	c10dc_c -> c10dc_p	Fatty acid oxidation	445.117	1000	0.445672
C10DCcNo1	Production of Sebacoylcarnitine (No1)	1.4172e-07 prot_P50416 + pmet_C10DCc -> m01597c + c10dc_c	Fatty acid oxidation	318.836	1000	0.319517
C10DCcNo2	Production of Sebacoylcarnitine (No2)	1.4172e-07 prot_Q8TCG5 + pmet_C10DCc -> m01597c + c10dc_c	Fatty acid oxidation	713.757	1000	0.714043
C10DCcNo3	Production of Sebacoylcarnitine (No3)	1.4172e-07 prot_Q92523 + pmet_C10DCc -> m01597c + c10dc_c	Fatty acid oxidation	9720.83	1000	9.71212
C10DCc_REVNo1	Production of Sebacoylcarnitine (reversible) (No1)	1.4172e-07 prot_P50416 + pmet_C10DCc_REV -> m02348c + sebcoa_c	Fatty acid oxidation	318.836	1000	0.319517
C10DCc_REVNo2	Production of Sebacoylcarnitine (reversible) (No2)	1.4172e-07 prot_Q8TCG5 + pmet_C10DCc_REV -> m02348c + sebcoa_c	Fatty acid oxidation	713.757	1000	0.714043
C10DCc_REVNo3	Production of Sebacoylcarnitine (reversible) (No3)	1.4172e-07 prot_Q92523 + pmet_C10DCc_REV -> m02348c + sebcoa_c	Fatty acid oxidation	9720.83	1000	9.71212
C10DCe	Transport of Sebacoyl Carnitine into Extra Cellular Space	c10dc_c -> c10dc_s	Fatty acid oxidation	1000	1000	1
C10DCtr	Transport of Sebacoyl Carnitine	c10dc_s -> c10dc_c	Transport reactions	1000	1000	1
C10DCtr_REV	Transport of Sebacoyl Carnitine (reversible)	c10dc_c -> c10dc_s	Transport reactions	1000	1000	1
C10OHcNo1	Production of 3-Ohdecanoylcarnitinec (No1)	1.4172e-07 prot_P50416 + pmet_C10OHc -> m01597c + 3deccrn_c	Fatty acid oxidation	318.836	1000	0.319517
C10OHcNo2	Production of 3-Ohdecanoylcarnitinec (No2)	1.4172e-07 prot_Q8TCG5 + pmet_C10OHc -> m01597c + 3deccrn_c	Fatty acid oxidation	713.757	1000	0.714043
C10OHcNo3	Production of 3-Ohdecanoylcarnitinec (No3)	1.4172e-07 prot_Q92523 + pmet_C10OHc -> m01597c + 3deccrn_c	Fatty acid oxidation	9720.83	1000	9.71212
C10OHc_REVNo1	Production of 3-Ohdecanoylcarnitinec (reversible) (No1)	1.4172e-07 prot_P50416 + pmet_C10OHc_REV -> m02348c + m00181c	Fatty acid oxidation	318.836	1000	0.319517
C10OHc_REVNo2	Production of 3-Ohdecanoylcarnitinec (reversible) (No2)	1.4172e-07 prot_Q8TCG5 + pmet_C10OHc_REV -> m02348c + m00181c	Fatty acid oxidation	713.757	1000	0.714043
C10OHc_REVNo3	Production of 3-Ohdecanoylcarnitinec (reversible) (No3)	1.4172e-07 prot_Q92523 + pmet_C10OHc_REV -> m02348c + m00181c	Fatty acid oxidation	9720.83	1000	9.71212
C11695td	Transport of Anandamide, Diffusion	m01335c -> m01335s	Transport reactions	1000	1000	1
C11695td_REV	Transport of Anandamide, Diffusion (reversible)	m01335s -> m01335c	Transport reactions	1000	1000	1
C120CPT1No1	Production of Dodecanoylcarnitine (No1)	1.4172e-07 prot_P50416 + pmet_C120CPT1 -> m01597c + ddeccrn_c	Fatty acid oxidation	318.836	1000	0.319517
C120CPT1No2	Production of Dodecanoylcarnitine (No2)	1.4172e-07 prot_Q8TCG5 + pmet_C120CPT1 -> m01597c + ddeccrn_c	Fatty acid oxidation	713.757	1000	0.714043
C120CPT1No3	Production of Dodecanoylcarnitine (No3)	1.4172e-07 prot_Q92523 + pmet_C120CPT1 -> m01597c + ddeccrn_c	Fatty acid oxidation	9720.83	1000	9.71212
C120CPT1_REVNo1	Production of Dodecanoylcarnitine (reversible) (No1)	1.4172e-07 prot_P50416 + pmet_C120CPT1_REV -> m02345c + m02348c	Fatty acid oxidation	318.836	1000	0.319517
C120CPT1_REVNo2	Production of Dodecanoylcarnitine (reversible) (No2)	1.4172e-07 prot_Q8TCG5 + pmet_C120CPT1_REV -> m02345c + m02348c	Fatty acid oxidation	713.757	1000	0.714043
C120CPT1_REVNo3	Production of Dodecanoylcarnitine (reversible) (No3)	1.4172e-07 prot_Q92523 + pmet_C120CPT1_REV -> m02345c + m02348c	Fatty acid oxidation	9720.83	1000	9.71212
C121CPT1No1	Production of Dodecenoylcarnitine (No1)	1.4172e-07 prot_P50416 + pmet_C121CPT1 -> m01597c + ddece1crn_c	Fatty acid oxidation	318.836	1000	0.319517
C121CPT1No2	Production of Dodecenoylcarnitine (No2)	1.4172e-07 prot_Q8TCG5 + pmet_C121CPT1 -> m01597c + ddece1crn_c	Fatty acid oxidation	713.757	1000	0.714043
C121CPT1No3	Production of Dodecenoylcarnitine (No3)	1.4172e-07 prot_Q92523 + pmet_C121CPT1 -> m01597c + ddece1crn_c	Fatty acid oxidation	9720.83	1000	9.71212
C121CPT1_REVNo1	Production of Dodecenoylcarnitine (reversible) (No1)	1.4172e-07 prot_P50416 + pmet_C121CPT1_REV -> m02348c + m00042c	Fatty acid oxidation	318.836	1000	0.319517
C121CPT1_REVNo2	Production of Dodecenoylcarnitine (reversible) (No2)	1.4172e-07 prot_Q8TCG5 + pmet_C121CPT1_REV -> m02348c + m00042c	Fatty acid oxidation	713.757	1000	0.714043
C121CPT1_REVNo3	Production of Dodecenoylcarnitine (reversible) (No3)	1.4172e-07 prot_Q92523 + pmet_C121CPT1_REV -> m02348c + m00042c	Fatty acid oxidation	9720.83	1000	9.71212
C12DCACOTNo1	Thioesterification of Dodecanedioyl Coenzyme A for Release into Cytosol (No1)	m02040p + c12dccoa_p + 1.5964e-07 prot_O14734 -> m01597p + m02039p + dodecanac_p	Fatty acid oxidation	873.213	1000	0.87334
C12DCACT	Activation of Dodecanedioic Acid	m01371c + m01597c + dodecanac_c -> m01334c + m02759c + c12dccoa_c	Fatty acid oxidation	1000	1000	1
C12DCTD	Transport of Dodecanedioic Acid by Diffusion	dodecanac_p -> dodecanac_c	Fatty acid oxidation	1000	1000	1
C12DCTD_REV	Transport of Dodecanedioic Acid by Diffusion (reversible)	dodecanac_c -> dodecanac_p	Fatty acid oxidation	1000	1000	1
C12DCe	Excretion of Dodecanedioyl Carnitine	c12dc_c -> c12dc_s	Fatty acid oxidation	1000	1000	1
C12DCtr	Transport of Dodecanedioyl Carnitine	c12dc_s -> c12dc_c	Transport reactions	1000	1000	1
C12DCtr_REV	Transport of Dodecanedioyl Carnitine (reversible)	c12dc_c -> c12dc_s	Transport reactions	1000	1000	1
C12OHcNo1	Production of 3-Ohdodecanoylcarnitinec (No1)	1.4172e-07 prot_P50416 + pmet_C12OHc -> m01597c + 3ddcrn_c	Fatty acid oxidation	318.836	1000	0.319517
C12OHcNo2	Production of 3-Ohdodecanoylcarnitinec (No2)	1.4172e-07 prot_Q8TCG5 + pmet_C12OHc -> m01597c + 3ddcrn_c	Fatty acid oxidation	713.757	1000	0.714043
C12OHcNo3	Production of 3-Ohdodecanoylcarnitinec (No3)	1.4172e-07 prot_Q92523 + pmet_C12OHc -> m01597c + 3ddcrn_c	Fatty acid oxidation	9720.83	1000	9.71212
C12OHc_REVNo1	Production of 3-Ohdodecanoylcarnitinec (reversible) (No1)	1.4172e-07 prot_P50416 + pmet_C12OHc_REV -> m02348c + m00174c	Fatty acid oxidation	318.836	1000	0.319517
C12OHc_REVNo2	Production of 3-Ohdodecanoylcarnitinec (reversible) (No2)	1.4172e-07 prot_Q8TCG5 + pmet_C12OHc_REV -> m02348c + m00174c	Fatty acid oxidation	713.757	1000	0.714043
C12OHc_REVNo3	Production of 3-Ohdodecanoylcarnitinec (reversible) (No3)	1.4172e-07 prot_Q92523 + pmet_C12OHc_REV -> m02348c + m00174c	Fatty acid oxidation	9720.83	1000	9.71212
C13856te	Assumed Passive Diffusion into Extracellular Space	m00635c -> m00635s	Transport reactions	1000	1000	1
C13856te_REV	Assumed Passive Diffusion into Extracellular Space (reversible)	m00635s -> m00635c	Transport reactions	1000	1000	1
C140CPT1No1	Production of Myristoylcarnitine (No1)	1.4172e-07 prot_P50416 + pmet_C140CPT1 -> m01597c + m02973c	Fatty acid oxidation	318.836	1000	0.319517
C140CPT1No2	Production of Myristoylcarnitine (No2)	1.4172e-07 prot_Q8TCG5 + pmet_C140CPT1 -> m01597c + m02973c	Fatty acid oxidation	713.757	1000	0.714043
C140CPT1No3	Production of Myristoylcarnitine (No3)	1.4172e-07 prot_Q92523 + pmet_C140CPT1 -> m01597c + m02973c	Fatty acid oxidation	9720.83	1000	9.71212
C140CPT1_REVNo1	Production of Myristoylcarnitine (reversible) (No1)	1.4172e-07 prot_P50416 + pmet_C140CPT1_REV -> m02348c + m02495c	Fatty acid oxidation	318.836	1000	0.319517
C140CPT1_REVNo2	Production of Myristoylcarnitine (reversible) (No2)	1.4172e-07 prot_Q8TCG5 + pmet_C140CPT1_REV -> m02348c + m02495c	Fatty acid oxidation	713.757	1000	0.714043
C140CPT1_REVNo3	Production of Myristoylcarnitine (reversible) (No3)	1.4172e-07 prot_Q92523 + pmet_C140CPT1_REV -> m02348c + m02495c	Fatty acid oxidation	9720.83	1000	9.71212
C141ACBP	Transport of 3-Hydroxytetradecenoyl Coenzyme A from Mitochondria into Cytosol	3tetd7ecoa_m -> 3tetd7ecoa_c	Fatty acid oxidation	1042.73	1000	1.04268
C141ACBP_REV	Transport of 3-Hydroxytetradecenoyl Coenzyme A from Mitochondria into Cytosol (reversible)	3tetd7ecoa_c -> 3tetd7ecoa_m	Fatty acid oxidation	1042.73	1000	1.04268
C141CPT1No1	Production of Tetradecenoylcarnitine (No1)	1.4172e-07 prot_P50416 + pmet_C141CPT1 -> m01597c + tetdece1crn_c	Fatty acid oxidation	318.836	1000	0.319517
C141CPT1No2	Production of Tetradecenoylcarnitine (No2)	1.4172e-07 prot_Q8TCG5 + pmet_C141CPT1 -> m01597c + tetdece1crn_c	Fatty acid oxidation	713.757	1000	0.714043
C141CPT1No3	Production of Tetradecenoylcarnitine (No3)	1.4172e-07 prot_Q92523 + pmet_C141CPT1 -> m01597c + tetdece1crn_c	Fatty acid oxidation	9720.83	1000	9.71212
C141CPT1_REVNo1	Production of Tetradecenoylcarnitine (reversible) (No1)	1.4172e-07 prot_P50416 + pmet_C141CPT1_REV -> m02348c + tetdece1coa_c	Fatty acid oxidation	318.836	1000	0.319517
C141CPT1_REVNo2	Production of Tetradecenoylcarnitine (reversible) (No2)	1.4172e-07 prot_Q8TCG5 + pmet_C141CPT1_REV -> m02348c + tetdece1coa_c	Fatty acid oxidation	713.757	1000	0.714043
C141CPT1_REVNo3	Production of Tetradecenoylcarnitine (reversible) (No3)	1.4172e-07 prot_Q92523 + pmet_C141CPT1_REV -> m02348c + tetdece1coa_c	Fatty acid oxidation	9720.83	1000	9.71212
C141OHcNo1	Production of 3-Hydroxytetradecenoyl Carnitine (No1)	1.4172e-07 prot_P50416 + pmet_C141OHc -> m01597c + 3tetd7ecoacrn_c	Fatty acid oxidation	318.836	1000	0.319517
C141OHcNo2	Production of 3-Hydroxytetradecenoyl Carnitine (No2)	1.4172e-07 prot_Q8TCG5 + pmet_C141OHc -> m01597c + 3tetd7ecoacrn_c	Fatty acid oxidation	713.757	1000	0.714043
C141OHcNo3	Production of 3-Hydroxytetradecenoyl Carnitine (No3)	1.4172e-07 prot_Q92523 + pmet_C141OHc -> m01597c + 3tetd7ecoacrn_c	Fatty acid oxidation	9720.83	1000	9.71212
C141OHc_REVNo1	Production of 3-Hydroxytetradecenoyl Carnitine (reversible) (No1)	1.4172e-07 prot_P50416 + pmet_C141OHc_REV -> m02348c + 3tetd7ecoa_c	Fatty acid oxidation	318.836	1000	0.319517
C141OHc_REVNo2	Production of 3-Hydroxytetradecenoyl Carnitine (reversible) (No2)	1.4172e-07 prot_Q8TCG5 + pmet_C141OHc_REV -> m02348c + 3tetd7ecoa_c	Fatty acid oxidation	713.757	1000	0.714043
C141OHc_REVNo3	Production of 3-Hydroxytetradecenoyl Carnitine (reversible) (No3)	1.4172e-07 prot_Q92523 + pmet_C141OHc_REV -> m02348c + 3tetd7ecoa_c	Fatty acid oxidation	9720.83	1000	9.71212
C141OHe	Excretion of 3-Hydroxy Tetradecenoyl-7-Carnitine	3tetd7ecoacrn_c -> 3tetd7ecoacrn_s	Fatty acid oxidation	1000	1000	1
C142ACBP	Transport of 3-Hydroxytetradeca Dienoyl Coenzyme A from Mitochondria into Cytosol	3ttetddcoa_m -> 3ttetddcoa_c	Fatty acid oxidation	1042.73	1000	1.04268
C142ACBP_REV	Transport of 3-Hydroxytetradeca Dienoyl Coenzyme A from Mitochondria into Cytosol (reversible)	3ttetddcoa_c -> 3ttetddcoa_m	Fatty acid oxidation	1042.73	1000	1.04268
C142CPT1No1	Production of Tetradecadienoylcarnitine (No1)	1.4172e-07 prot_P50416 + pmet_C142CPT1 -> m01597c + tetdec2crn_c	Fatty acid oxidation	318.836	1000	0.319517
C142CPT1No2	Production of Tetradecadienoylcarnitine (No2)	1.4172e-07 prot_Q8TCG5 + pmet_C142CPT1 -> m01597c + tetdec2crn_c	Fatty acid oxidation	713.757	1000	0.714043
C142CPT1No3	Production of Tetradecadienoylcarnitine (No3)	1.4172e-07 prot_Q92523 + pmet_C142CPT1 -> m01597c + tetdec2crn_c	Fatty acid oxidation	9720.83	1000	9.71212
C142CPT1_REVNo1	Production of Tetradecadienoylcarnitine (reversible) (No1)	1.4172e-07 prot_P50416 + pmet_C142CPT1_REV -> m02348c + tetdec2coa_c	Fatty acid oxidation	318.836	1000	0.319517
C142CPT1_REVNo2	Production of Tetradecadienoylcarnitine (reversible) (No2)	1.4172e-07 prot_Q8TCG5 + pmet_C142CPT1_REV -> m02348c + tetdec2coa_c	Fatty acid oxidation	713.757	1000	0.714043
C142CPT1_REVNo3	Production of Tetradecadienoylcarnitine (reversible) (No3)	1.4172e-07 prot_Q92523 + pmet_C142CPT1_REV -> m02348c + tetdec2coa_c	Fatty acid oxidation	9720.83	1000	9.71212
C142OHcNo1	Production of 3-Hydroxytetradeca Dienoyl Carnitine (No1)	1.4172e-07 prot_P50416 + pmet_C142OHc -> m01597c + 3ttetddcoacrn_c	Fatty acid oxidation	318.836	1000	0.319517
C142OHcNo2	Production of 3-Hydroxytetradeca Dienoyl Carnitine (No2)	1.4172e-07 prot_Q8TCG5 + pmet_C142OHc -> m01597c + 3ttetddcoacrn_c	Fatty acid oxidation	713.757	1000	0.714043
C142OHcNo3	Production of 3-Hydroxytetradeca Dienoyl Carnitine (No3)	1.4172e-07 prot_Q92523 + pmet_C142OHc -> m01597c + 3ttetddcoacrn_c	Fatty acid oxidation	9720.83	1000	9.71212
C142OHc_REVNo1	Production of 3-Hydroxytetradeca Dienoyl Carnitine (reversible) (No1)	1.4172e-07 prot_P50416 + pmet_C142OHc_REV -> m02348c + 3ttetddcoa_c	Fatty acid oxidation	318.836	1000	0.319517
C142OHc_REVNo2	Production of 3-Hydroxytetradeca Dienoyl Carnitine (reversible) (No2)	1.4172e-07 prot_Q8TCG5 + pmet_C142OHc_REV -> m02348c + 3ttetddcoa_c	Fatty acid oxidation	713.757	1000	0.714043
C142OHc_REVNo3	Production of 3-Hydroxytetradeca Dienoyl Carnitine (reversible) (No3)	1.4172e-07 prot_Q92523 + pmet_C142OHc_REV -> m02348c + 3ttetddcoa_c	Fatty acid oxidation	9720.83	1000	9.71212
C142OHe	Excretion of 3-Hydroxy Trans5,8Tetradecadienoyl Carnitine	3ttetddcoacrn_c -> 3ttetddcoacrn_s	Fatty acid oxidation	1000	1000	1
C14768ATP	Transport of 5, 6-EET, Active Transport	m01054c + m01371c + m02040c -> m01285c + m02039c + m02751c + m01054s	Transport reactions	1000	1000	1
C14768td	Transport of 5, 6-EET, Diffusion	m01054c -> m01054s	Transport reactions	1000	1000	1
C14768td_REV	Transport of 5, 6-EET, Diffusion (reversible)	m01054s -> m01054c	Transport reactions	1000	1000	1
C14769td1	Transport of 8, 9-EET, Diffusion	m01209c -> m01209s	Transport reactions	1000	1000	1
C14769td1_REV	Transport of 8, 9-EET, Diffusion (reversible)	m01209s -> m01209c	Transport reactions	1000	1000	1
C14769td2	Transport of 8, 9-EET, Active Transport	m01209c + m01371c + m02040c -> m01285c + m02039c + m02751c + m01209s	Transport reactions	1000	1000	1
C14770ATP	Transport of 11, 12-EET, FATP	m00279c + m01371c + m02040c -> m01285c + m02039c + m02751c + m00279s	Transport reactions	1000	1000	1
C14770UPKt	Transport of 11, 12-EET, Diffusion	m00279s -> m00279c	Transport reactions	1000	1000	1
C14771ATP	Transport of 14, 15-EET, Active Transport	m00366c + m01371c + m02040c -> m01285c + m02039c + m02751c + m00366s	Transport reactions	1000	1000	1
C14771UPKt	Transport of 14, 15-EET, Diffusion	m00366s -> m00366c	Transport reactions	1000	1000	1
C14825ATP	Transport of 9 (10)-Epome, Active Transport	m01216c + m01371c + m02040c -> m01285c + m02039c + m02751c + m01216s	Transport reactions	1000	1000	1
C14825td	Transport of 9 (10)-Epome, Diffusion	m01216c -> m01216s	Transport reactions	1000	1000	1
C14825td_REV	Transport of 9 (10)-Epome, Diffusion (reversible)	m01216s -> m01216c	Transport reactions	1000	1000	1
C14826ATP	Transport of 12 (13)-Epome, FATP	m00305c + m01371c + m02040c -> m01285c + m02039c + m02751c + m00305s	Transport reactions	1000	1000	1
C14826td	Transport of 12 (13)-Epome, Diffusion	m00305c -> m00305s	Transport reactions	1000	1000	1
C14826td_REV	Transport of 12 (13)-Epome, Diffusion (reversible)	m00305s -> m00305c	Transport reactions	1000	1000	1
C14OHcNo1	Production of 3-Hydroxytetradecanoylcarnitine (No1)	1.4172e-07 prot_P50416 + pmet_C14OHc -> m01597c + 3tdcrn_c	Fatty acid oxidation	318.836	1000	0.319517
C14OHcNo2	Production of 3-Hydroxytetradecanoylcarnitine (No2)	1.4172e-07 prot_Q8TCG5 + pmet_C14OHc -> m01597c + 3tdcrn_c	Fatty acid oxidation	713.757	1000	0.714043
C14OHcNo3	Production of 3-Hydroxytetradecanoylcarnitine (No3)	1.4172e-07 prot_Q92523 + pmet_C14OHc -> m01597c + 3tdcrn_c	Fatty acid oxidation	9720.83	1000	9.71212
C14OHc_REVNo1	Production of 3-Hydroxytetradecanoylcarnitine (reversible) (No1)	1.4172e-07 prot_P50416 + pmet_C14OHc_REV -> m02348c + m00178c	Fatty acid oxidation	318.836	1000	0.319517
C14OHc_REVNo2	Production of 3-Hydroxytetradecanoylcarnitine (reversible) (No2)	1.4172e-07 prot_Q8TCG5 + pmet_C14OHc_REV -> m02348c + m00178c	Fatty acid oxidation	713.757	1000	0.714043
C14OHc_REVNo3	Production of 3-Hydroxytetradecanoylcarnitine (reversible) (No3)	1.4172e-07 prot_Q92523 + pmet_C14OHc_REV -> m02348c + m00178c	Fatty acid oxidation	9720.83	1000	9.71212
C14STRrNo1	C-14 Sterol Reductase (No1)	m02039r + m02555r + m00941r + 0.0016244 prot_O76062 -> m02554r + m00367r	Cholesterol metabolism	1554.13	1000	1.55358
C160CRNt	C160 Transport into the Mitochondria	m02411c -> m02411m	Fatty acid oxidation	445.117	1000	0.445672
C160CRNt_REV	C160 Transport into the Mitochondria (reversible)	m02411m -> m02411c	Fatty acid oxidation	445.117	1000	0.445672
C161CPT12No1	Carnitine O-Palmitoyltransferase (No1)	1.4172e-07 prot_P50416 + pmet_C161CPT12 -> m01597c + m02117c	Fatty acid oxidation	318.836	1000	0.319517
C161CPT12No2	Carnitine O-Palmitoyltransferase (No2)	1.4172e-07 prot_Q8TCG5 + pmet_C161CPT12 -> m01597c + m02117c	Fatty acid oxidation	713.757	1000	0.714043
C161CPT12No3	Carnitine O-Palmitoyltransferase (No3)	1.4172e-07 prot_Q92523 + pmet_C161CPT12 -> m01597c + m02117c	Fatty acid oxidation	9720.83	1000	9.71212
C161CPT12_REVNo1	Carnitine O-Palmitoyltransferase (reversible) (No1)	1.4172e-07 prot_P50416 + pmet_C161CPT12_REV -> m02348c + m00051c	Fatty acid oxidation	318.836	1000	0.319517
C161CPT12_REVNo2	Carnitine O-Palmitoyltransferase (reversible) (No2)	1.4172e-07 prot_Q8TCG5 + pmet_C161CPT12_REV -> m02348c + m00051c	Fatty acid oxidation	713.757	1000	0.714043
C161CPT12_REVNo3	Carnitine O-Palmitoyltransferase (reversible) (No3)	1.4172e-07 prot_Q92523 + pmet_C161CPT12_REV -> m02348c + m00051c	Fatty acid oxidation	9720.83	1000	9.71212
C161CPT22No1	C161 Transport into the Mitochondria (No1)	m01597m + m02117m + 1.4172e-07 prot_P23786 -> m00051m + m02348m	Fatty acid oxidation	725.265	1000	0.725539
C161CPT22_REVNo1	C161 Transport into the Mitochondria (reversible) (No1)	m00051m + m02348m + 1.4172e-07 prot_P23786 -> m01597m + m02117m	Fatty acid oxidation	725.265	1000	0.725539
C161CRN2t	C161 Transport into the Mitochondria	m02117c -> m02117m	Fatty acid oxidation	445.117	1000	0.445672
C161CRN2t_REV	C161 Transport into the Mitochondria (reversible)	m02117m -> m02117c	Fatty acid oxidation	445.117	1000	0.445672
C161CRNt	C161 Transport into the Mitochondria	m02676c -> m02676m	Fatty acid oxidation	445.117	1000	0.445672
C161CRNt_REV	C161 Transport into the Mitochondria (reversible)	m02676m -> m02676c	Fatty acid oxidation	445.117	1000	0.445672
C161OHcNo1	Production of 3-Hydroxyhexadecenoylcarnitine (No1)	1.4172e-07 prot_P50416 + pmet_C161OHc -> m01597c + 3hdececrn_c	Fatty acid oxidation	318.836	1000	0.319517
C161OHcNo2	Production of 3-Hydroxyhexadecenoylcarnitine (No2)	1.4172e-07 prot_Q8TCG5 + pmet_C161OHc -> m01597c + 3hdececrn_c	Fatty acid oxidation	713.757	1000	0.714043
C161OHcNo3	Production of 3-Hydroxyhexadecenoylcarnitine (No3)	1.4172e-07 prot_Q92523 + pmet_C161OHc -> m01597c + 3hdececrn_c	Fatty acid oxidation	9720.83	1000	9.71212
C161OHc_REVNo1	Production of 3-Hydroxyhexadecenoylcarnitine (reversible) (No1)	1.4172e-07 prot_P50416 + pmet_C161OHc_REV -> m02348c + 3hdeccoa_c	Fatty acid oxidation	318.836	1000	0.319517
C161OHc_REVNo2	Production of 3-Hydroxyhexadecenoylcarnitine (reversible) (No2)	1.4172e-07 prot_Q8TCG5 + pmet_C161OHc_REV -> m02348c + 3hdeccoa_c	Fatty acid oxidation	713.757	1000	0.714043
C161OHc_REVNo3	Production of 3-Hydroxyhexadecenoylcarnitine (reversible) (No3)	1.4172e-07 prot_Q92523 + pmet_C161OHc_REV -> m02348c + 3hdeccoa_c	Fatty acid oxidation	9720.83	1000	9.71212
C162ACBP	Transport of 3-Hydroxy Trans7, 10-Hexadecadienoylcoa from Mitochondria into Cytosol	3thexddcoa_m -> 3thexddcoa_c	Fatty acid oxidation	1042.73	1000	1.04268
C162ACBP_REV	Transport of 3-Hydroxy Trans7, 10-Hexadecadienoylcoa from Mitochondria into Cytosol (reversible)	3thexddcoa_c -> 3thexddcoa_m	Fatty acid oxidation	1042.73	1000	1.04268
C162OHcNo1	Production of 3-Hydroxy Hexadecadienoyl Carnitine (No1)	1.4172e-07 prot_P50416 + pmet_C162OHc -> m01597c + 3thexddcoacrn_c	Fatty acid oxidation	318.836	1000	0.319517
C162OHcNo2	Production of 3-Hydroxy Hexadecadienoyl Carnitine (No2)	1.4172e-07 prot_Q8TCG5 + pmet_C162OHc -> m01597c + 3thexddcoacrn_c	Fatty acid oxidation	713.757	1000	0.714043
C162OHcNo3	Production of 3-Hydroxy Hexadecadienoyl Carnitine (No3)	1.4172e-07 prot_Q92523 + pmet_C162OHc -> m01597c + 3thexddcoacrn_c	Fatty acid oxidation	9720.83	1000	9.71212
C162OHc_REVNo1	Production of 3-Hydroxy Hexadecadienoyl Carnitine (reversible) (No1)	1.4172e-07 prot_P50416 + pmet_C162OHc_REV -> m02348c + 3thexddcoa_c	Fatty acid oxidation	318.836	1000	0.319517
C162OHc_REVNo2	Production of 3-Hydroxy Hexadecadienoyl Carnitine (reversible) (No2)	1.4172e-07 prot_Q8TCG5 + pmet_C162OHc_REV -> m02348c + 3thexddcoa_c	Fatty acid oxidation	713.757	1000	0.714043
C162OHc_REVNo3	Production of 3-Hydroxy Hexadecadienoyl Carnitine (reversible) (No3)	1.4172e-07 prot_Q92523 + pmet_C162OHc_REV -> m02348c + 3thexddcoa_c	Fatty acid oxidation	9720.83	1000	9.71212
C162OHe	Excretion of 3-Hydroxy Trans7,10-Hexadecadienoyl Carnitine	3thexddcoacrn_c -> 3thexddcoacrn_s	Fatty acid oxidation	1000	1000	1
C16DCcNo1	Production of Hexadecanedioylcarnitine (No1)	1.4172e-07 prot_P50416 + pmet_C16DCc -> m01597c + c16dc_c	Fatty acid oxidation	318.836	1000	0.319517
C16DCcNo2	Production of Hexadecanedioylcarnitine (No2)	1.4172e-07 prot_Q8TCG5 + pmet_C16DCc -> m01597c + c16dc_c	Fatty acid oxidation	713.757	1000	0.714043
C16DCcNo3	Production of Hexadecanedioylcarnitine (No3)	1.4172e-07 prot_Q92523 + pmet_C16DCc -> m01597c + c16dc_c	Fatty acid oxidation	9720.83	1000	9.71212
C16DCc_REVNo1	Production of Hexadecanedioylcarnitine (reversible) (No1)	1.4172e-07 prot_P50416 + pmet_C16DCc_REV -> m02348c + hexdicoa_c	Fatty acid oxidation	318.836	1000	0.319517
C16DCc_REVNo2	Production of Hexadecanedioylcarnitine (reversible) (No2)	1.4172e-07 prot_Q8TCG5 + pmet_C16DCc_REV -> m02348c + hexdicoa_c	Fatty acid oxidation	713.757	1000	0.714043
C16DCc_REVNo3	Production of Hexadecanedioylcarnitine (reversible) (No3)	1.4172e-07 prot_Q92523 + pmet_C16DCc_REV -> m02348c + hexdicoa_c	Fatty acid oxidation	9720.83	1000	9.71212
C16DCe	Transport of Hexadecanedioic Acid Mono-L-Carnitine Ester into Extra Cellular Space	c16dc_c -> c16dc_s	Fatty acid oxidation	1000	1000	1
C16DCtr	Transport of Hexadecanedioic Acid Mono-L-Carnitine Ester	c16dc_s -> c16dc_c	Transport reactions	1000	1000	1
C16DCtr_REV	Transport of Hexadecanedioic Acid Mono-L-Carnitine Ester (reversible)	c16dc_c -> c16dc_s	Transport reactions	1000	1000	1
C16OHcNo1	Production of 3-Hydroxyhexadecanoylcarnitinec (No1)	1.4172e-07 prot_P50416 + pmet_C16OHc -> m01597c + 3hexdcrn_c	Fatty acid oxidation	318.836	1000	0.319517
C16OHcNo2	Production of 3-Hydroxyhexadecanoylcarnitinec (No2)	1.4172e-07 prot_Q8TCG5 + pmet_C16OHc -> m01597c + 3hexdcrn_c	Fatty acid oxidation	713.757	1000	0.714043
C16OHcNo3	Production of 3-Hydroxyhexadecanoylcarnitinec (No3)	1.4172e-07 prot_Q92523 + pmet_C16OHc -> m01597c + 3hexdcrn_c	Fatty acid oxidation	9720.83	1000	9.71212
C16OHc_REVNo1	Production of 3-Hydroxyhexadecanoylcarnitinec (reversible) (No1)	1.4172e-07 prot_P50416 + pmet_C16OHc_REV -> m02348c + 3hexdcoa_c	Fatty acid oxidation	318.836	1000	0.319517
C16OHc_REVNo2	Production of 3-Hydroxyhexadecanoylcarnitinec (reversible) (No2)	1.4172e-07 prot_Q8TCG5 + pmet_C16OHc_REV -> m02348c + 3hexdcoa_c	Fatty acid oxidation	713.757	1000	0.714043
C16OHc_REVNo3	Production of 3-Hydroxyhexadecanoylcarnitinec (reversible) (No3)	1.4172e-07 prot_Q92523 + pmet_C16OHc_REV -> m02348c + 3hexdcoa_c	Fatty acid oxidation	9720.83	1000	9.71212
C180CRNt	C180 Transport into the Mitochondria	m02940c -> m02940m	Fatty acid oxidation	445.117	1000	0.445672
C180CRNt_REV	C180 Transport into the Mitochondria (reversible)	m02940m -> m02940c	Fatty acid oxidation	445.117	1000	0.445672
C181CPT1No1	Transport of Octadecenoyl Coenzyme A into Mitochondrial Matrix (No1)	1.4172e-07 prot_P50416 + pmet_C181CPT1 -> m01597c + m02639c	Fatty acid oxidation	318.836	1000	0.319517
C181CPT1No2	Transport of Octadecenoyl Coenzyme A into Mitochondrial Matrix (No2)	1.4172e-07 prot_Q8TCG5 + pmet_C181CPT1 -> m01597c + m02639c	Fatty acid oxidation	713.757	1000	0.714043
C181CPT1No3	Transport of Octadecenoyl Coenzyme A into Mitochondrial Matrix (No3)	1.4172e-07 prot_Q92523 + pmet_C181CPT1 -> m01597c + m02639c	Fatty acid oxidation	9720.83	1000	9.71212
C181CPT1_REVNo1	Transport of Octadecenoyl Coenzyme A into Mitochondrial Matrix (reversible) (No1)	1.4172e-07 prot_P50416 + pmet_C181CPT1_REV -> m02348c + m02647c	Fatty acid oxidation	318.836	1000	0.319517
C181CPT1_REVNo2	Transport of Octadecenoyl Coenzyme A into Mitochondrial Matrix (reversible) (No2)	1.4172e-07 prot_Q8TCG5 + pmet_C181CPT1_REV -> m02348c + m02647c	Fatty acid oxidation	713.757	1000	0.714043
C181CPT1_REVNo3	Transport of Octadecenoyl Coenzyme A into Mitochondrial Matrix (reversible) (No3)	1.4172e-07 prot_Q92523 + pmet_C181CPT1_REV -> m02348c + m02647c	Fatty acid oxidation	9720.83	1000	9.71212
C181CPT2No1	Transport of Octadecenoyl Coenzyme A into Mitochondrial Matrix (No1)	m01597m + m02639m + 1.4172e-07 prot_P23786 -> m02348m + m02647m	Fatty acid oxidation	725.265	1000	0.725539
C181CPT2_REVNo1	Transport of Octadecenoyl Coenzyme A into Mitochondrial Matrix (reversible) (No1)	m02348m + m02647m + 1.4172e-07 prot_P23786 -> m01597m + m02639m	Fatty acid oxidation	725.265	1000	0.725539
C181CPT2rbc	Carnitine Octadecenoyl Transferase	m01597c + m02639c -> m02348c + m02647c	Fatty acid oxidation	1000	1000	1
C181CPT2rbc_REV	Carnitine Octadecenoyl Transferase (reversible)	m02348c + m02647c -> m01597c + m02639c	Fatty acid oxidation	1000	1000	1
C181CRNt	C181 Transport into the Mitochondria	m02639c -> m02639m	Fatty acid oxidation	445.117	1000	0.445672
C181CRNt_REV	C181 Transport into the Mitochondria (reversible)	m02639m -> m02639c	Fatty acid oxidation	445.117	1000	0.445672
C181OHcNo1	Production of 3-Hydroxyoctadecenoylcarnitinec (No1)	1.4172e-07 prot_P50416 + pmet_C181OHc -> m01597c + 3octdece1crn_c	Fatty acid oxidation	318.836	1000	0.319517
C181OHcNo2	Production of 3-Hydroxyoctadecenoylcarnitinec (No2)	1.4172e-07 prot_Q8TCG5 + pmet_C181OHc -> m01597c + 3octdece1crn_c	Fatty acid oxidation	713.757	1000	0.714043
C181OHcNo3	Production of 3-Hydroxyoctadecenoylcarnitinec (No3)	1.4172e-07 prot_Q92523 + pmet_C181OHc -> m01597c + 3octdece1crn_c	Fatty acid oxidation	9720.83	1000	9.71212
C181OHc_REVNo1	Production of 3-Hydroxyoctadecenoylcarnitinec (reversible) (No1)	1.4172e-07 prot_P50416 + pmet_C181OHc_REV -> m02348c + 3octdece1coa_c	Fatty acid oxidation	318.836	1000	0.319517
C181OHc_REVNo2	Production of 3-Hydroxyoctadecenoylcarnitinec (reversible) (No2)	1.4172e-07 prot_Q8TCG5 + pmet_C181OHc_REV -> m02348c + 3octdece1coa_c	Fatty acid oxidation	713.757	1000	0.714043
C181OHc_REVNo3	Production of 3-Hydroxyoctadecenoylcarnitinec (reversible) (No3)	1.4172e-07 prot_Q92523 + pmet_C181OHc_REV -> m02348c + 3octdece1coa_c	Fatty acid oxidation	9720.83	1000	9.71212
C182OHcNo1	Production of 3-Hydroxyoctadecadienoylcarnitine (No1)	1.4172e-07 prot_P50416 + pmet_C182OHc -> m01597c + 3octdec2crn_c	Fatty acid oxidation	318.836	1000	0.319517
C182OHcNo2	Production of 3-Hydroxyoctadecadienoylcarnitine (No2)	1.4172e-07 prot_Q8TCG5 + pmet_C182OHc -> m01597c + 3octdec2crn_c	Fatty acid oxidation	713.757	1000	0.714043
C182OHcNo3	Production of 3-Hydroxyoctadecadienoylcarnitine (No3)	1.4172e-07 prot_Q92523 + pmet_C182OHc -> m01597c + 3octdec2crn_c	Fatty acid oxidation	9720.83	1000	9.71212
C182OHc_REVNo1	Production of 3-Hydroxyoctadecadienoylcarnitine (reversible) (No1)	1.4172e-07 prot_P50416 + pmet_C182OHc_REV -> m02348c + 3ocddcoa_c	Fatty acid oxidation	318.836	1000	0.319517
C182OHc_REVNo2	Production of 3-Hydroxyoctadecadienoylcarnitine (reversible) (No2)	1.4172e-07 prot_Q8TCG5 + pmet_C182OHc_REV -> m02348c + 3ocddcoa_c	Fatty acid oxidation	713.757	1000	0.714043
C182OHc_REVNo3	Production of 3-Hydroxyoctadecadienoylcarnitine (reversible) (No3)	1.4172e-07 prot_Q92523 + pmet_C182OHc_REV -> m02348c + 3ocddcoa_c	Fatty acid oxidation	9720.83	1000	9.71212
C18OHcNo1	Production of 3-Hydroxyoctadecanoylcarnitine (No1)	1.4172e-07 prot_P50416 + pmet_C18OHc -> m01597c + 3octdeccrn_c	Fatty acid oxidation	318.836	1000	0.319517
C18OHcNo2	Production of 3-Hydroxyoctadecanoylcarnitine (No2)	1.4172e-07 prot_Q8TCG5 + pmet_C18OHc -> m01597c + 3octdeccrn_c	Fatty acid oxidation	713.757	1000	0.714043
C18OHcNo3	Production of 3-Hydroxyoctadecanoylcarnitine (No3)	1.4172e-07 prot_Q92523 + pmet_C18OHc -> m01597c + 3octdeccrn_c	Fatty acid oxidation	9720.83	1000	9.71212
C18OHc_REVNo1	Production of 3-Hydroxyoctadecanoylcarnitine (reversible) (No1)	1.4172e-07 prot_P50416 + pmet_C18OHc_REV -> m02348c + 3hodcoa_c	Fatty acid oxidation	318.836	1000	0.319517
C18OHc_REVNo2	Production of 3-Hydroxyoctadecanoylcarnitine (reversible) (No2)	1.4172e-07 prot_Q8TCG5 + pmet_C18OHc_REV -> m02348c + 3hodcoa_c	Fatty acid oxidation	713.757	1000	0.714043
C18OHc_REVNo3	Production of 3-Hydroxyoctadecanoylcarnitine (reversible) (No3)	1.4172e-07 prot_Q92523 + pmet_C18OHc_REV -> m02348c + 3hodcoa_c	Fatty acid oxidation	9720.83	1000	9.71212
C204CRNt	Arachidonic Acid Transport into the Mitochondria	m01363c -> m01363m	Fatty acid oxidation	445.117	1000	0.445672
C204CRNt_REV	Arachidonic Acid Transport into the Mitochondria (reversible)	m01363m -> m01363c	Fatty acid oxidation	445.117	1000	0.445672
C226CRNt	C226 Transport into the Mitochondria	m01723c -> m01723m	Fatty acid oxidation	1000	1000	1
C226CRNt_REV	C226 Transport into the Mitochondria (reversible)	m01723m -> m01723c	Fatty acid oxidation	1000	1000	1
C2tcx	Transport of Acetylcarnitine from Peroxisomes to Cytosol	m02634p -> m02634c	Transport reactions	445.117	1000	0.445672
C2tcx_REV	Transport of Acetylcarnitine from Peroxisomes to Cytosol (reversible)	m02634c -> m02634p	Transport reactions	445.117	1000	0.445672
C3DCe	Transport of Malonyl Carnitine into Extra Cellular Space	c3dc_c -> c3dc_s	Fatty acid oxidation	1000	1000	1
C3DCtr	Transport of Malonyl Carnitine	c3dc_s -> c3dc_c	Transport reactions	1000	1000	1
C3DCtr_REV	Transport of Malonyl Carnitine (reversible)	c3dc_c -> c3dc_s	Transport reactions	1000	1000	1
C3STDH1PrNo1	C-3 Sterol Dehydrogenase (4-Methylzymosterol) (No1)	m02554r + m00953r + 1.1067e-06 prot_Q15738 -> m01596r + m02039r + m02555r + m00809r	Cholesterol metabolism	268.039	277.778	0.965066
C3STDH1rNo1	C-3 Sterol Dehydrogenase (4-Methylzymosterol) (No1)	m02552r + m00953r + 1.5288e-07 prot_Q15738 -> m01596r + m02039r + m02553r + m00809r	Cholesterol metabolism	268.039	277.778	0.965066
C3STKR2rNo1	C-3 Sterol Keto Reductase (Zymosterol) (No1)	m02039r + m02555r + zym_int2_r + 6.6138e-11 prot_P51659 -> m02554r + m03158r	Cholesterol metabolism	268.039	277.778	0.965066
C4CRNe	Transport of Butyryl Carnitine into the Extra Cellular Space	m02635c -> m02635s	Fatty acid oxidation	1000	1000	1
C4CRNtr	Transport of Butyryl Carnitine	m02635s -> m02635c	Transport reactions	1000	1000	1
C4CRNtr_REV	Transport of Butyryl Carnitine (reversible)	m02635c -> m02635s	Transport reactions	1000	1000	1
C4DCCACT	Transport of Succinyl Carnitine into Cytosol	c4dc_p -> c4dc_c	Fatty acid oxidation	445.117	1000	0.445672
C4DCCACT_REV	Transport of Succinyl Carnitine into Cytosol (reversible)	c4dc_c -> c4dc_p	Fatty acid oxidation	445.117	1000	0.445672
C4DCe	Transport of Succinyl Carnitine into the Extra Cellular Space	c4dc_c -> c4dc_s	Fatty acid oxidation	1000	1000	1
C4DCtr	Transport of Succinyl Carnitine	c4dc_s -> c4dc_c	Transport reactions	1000	1000	1
C4DCtr_REV	Transport of Succinyl Carnitine (reversible)	c4dc_c -> c4dc_s	Transport reactions	1000	1000	1
C4OHcNo1	Production of 3-Hydroxybytyryl Carnitinec (No1)	1.4172e-07 prot_P50416 + pmet_C4OHc -> m01597c + 3bcrn_c	Fatty acid oxidation	318.836	1000	0.319517
C4OHcNo2	Production of 3-Hydroxybytyryl Carnitinec (No2)	1.4172e-07 prot_Q8TCG5 + pmet_C4OHc -> m01597c + 3bcrn_c	Fatty acid oxidation	713.757	1000	0.714043
C4OHcNo3	Production of 3-Hydroxybytyryl Carnitinec (No3)	1.4172e-07 prot_Q92523 + pmet_C4OHc -> m01597c + 3bcrn_c	Fatty acid oxidation	9720.83	1000	9.71212
C4OHc_REVNo1	Production of 3-Hydroxybytyryl Carnitinec (reversible) (No1)	1.4172e-07 prot_P50416 + pmet_C4OHc_REV -> m02348c + m00159c	Fatty acid oxidation	318.836	1000	0.319517
C4OHc_REVNo2	Production of 3-Hydroxybytyryl Carnitinec (reversible) (No2)	1.4172e-07 prot_Q8TCG5 + pmet_C4OHc_REV -> m02348c + m00159c	Fatty acid oxidation	713.757	1000	0.714043
C4OHc_REVNo3	Production of 3-Hydroxybytyryl Carnitinec (reversible) (No3)	1.4172e-07 prot_Q92523 + pmet_C4OHc_REV -> m02348c + m00159c	Fatty acid oxidation	9720.83	1000	9.71212
C4STMO1rNo1	C-4 Sterol Methyl Oxidase (4, 4-Dimethylzymosterol) (No1)	3 m02039r + 3 m02555r + 3 m02630r + m00367r + 3.5311e-05 prot_Q15800 -> 4 m02040r + 3 m02554r + m00953r	Cholesterol metabolism	268.039	277.778	0.965066
C4STMO2PrNo1	C-4 Methyl Sterol Oxidase (No1)	m02554r + m02630r + m00809r + 1.1067e-06 prot_Q15738 -> m01596r + m02039r + m02555r + zym_int2_r	Cholesterol metabolism	268.039	277.778	0.965066
C4STMO2rNo1	C-4 Methyl Sterol Oxidase (No1)	6.5669e-06 prot_Q15800 + pmet_C4STMO2r -> m01596r + m02039r + m02553r + zym_int2_r	Cholesterol metabolism	268.039	277.778	0.965066
C4STMO2rNo2	C-4 Methyl Sterol Oxidase (No2)	1.5288e-07 prot_Q15738 + pmet_C4STMO2r -> m01596r + m02039r + m02553r + zym_int2_r	Cholesterol metabolism	268.039	277.778	0.965066
C4tcx	Transport of Bytyrylcarnitine from Peroxisomes	m02635p -> m02635c	Transport reactions	445.117	1000	0.445672
C4tcx_REV	Transport of Bytyrylcarnitine from Peroxisomes (reversible)	m02635c -> m02635p	Transport reactions	445.117	1000	0.445672
C4tmc	Transport of Bytyrylcarnitine into Mitochondrial Matrix	m02635c -> m02635m	Transport reactions	445.117	1000	0.445672
C4tmc_REV	Transport of Bytyrylcarnitine into Mitochondrial Matrix (reversible)	m02635m -> m02635c	Transport reactions	445.117	1000	0.445672
C4xNo1	Esterification of Butyrylcoa to Butyrylcarnitine for Transport (No1)	m01412p + m02348p + 0.00075689 prot_Q9UKG9 -> m01597p + m02635p	Transport reactions	732.704	1000	0.732971
C4x_REVNo1	Esterification of Butyrylcoa to Butyrylcarnitine for Transport (reversible) (No1)	m01597p + m02635p + 0.00075689 prot_Q9UKG9 -> m01412p + m02348p	Transport reactions	732.704	1000	0.732971
C50CPT1No1	Production of Isovalerylcarnitine (No1)	1.4172e-07 prot_P50416 + pmet_C50CPT1 -> m01597c + ivcrn_c	Fatty acid oxidation	318.836	1000	0.319517
C50CPT1No2	Production of Isovalerylcarnitine (No2)	1.4172e-07 prot_Q8TCG5 + pmet_C50CPT1 -> m01597c + ivcrn_c	Fatty acid oxidation	713.757	1000	0.714043
C50CPT1No3	Production of Isovalerylcarnitine (No3)	1.4172e-07 prot_Q92523 + pmet_C50CPT1 -> m01597c + ivcrn_c	Fatty acid oxidation	9720.83	1000	9.71212
C50CPT1_REVNo1	Production of Isovalerylcarnitine (reversible) (No1)	1.4172e-07 prot_P50416 + pmet_C50CPT1_REV -> m02348c + m02189c	Fatty acid oxidation	318.836	1000	0.319517
C50CPT1_REVNo2	Production of Isovalerylcarnitine (reversible) (No2)	1.4172e-07 prot_Q8TCG5 + pmet_C50CPT1_REV -> m02348c + m02189c	Fatty acid oxidation	713.757	1000	0.714043
C50CPT1_REVNo3	Production of Isovalerylcarnitine (reversible) (No3)	1.4172e-07 prot_Q92523 + pmet_C50CPT1_REV -> m02348c + m02189c	Fatty acid oxidation	9720.83	1000	9.71212
C51CPT1No1	Production of Tiglylcarnitine (No1)	1.4172e-07 prot_P50416 + pmet_C51CPT1 -> m01597c + c51crn_c	Fatty acid oxidation	318.836	1000	0.319517
C51CPT1No2	Production of Tiglylcarnitine (No2)	1.4172e-07 prot_Q8TCG5 + pmet_C51CPT1 -> m01597c + c51crn_c	Fatty acid oxidation	713.757	1000	0.714043
C51CPT1No3	Production of Tiglylcarnitine (No3)	1.4172e-07 prot_Q92523 + pmet_C51CPT1 -> m01597c + c51crn_c	Fatty acid oxidation	9720.83	1000	9.71212
C51CPT1_REVNo1	Production of Tiglylcarnitine (reversible) (No1)	1.4172e-07 prot_P50416 + pmet_C51CPT1_REV -> m02348c + m02999c	Fatty acid oxidation	318.836	1000	0.319517
C51CPT1_REVNo2	Production of Tiglylcarnitine (reversible) (No2)	1.4172e-07 prot_Q8TCG5 + pmet_C51CPT1_REV -> m02348c + m02999c	Fatty acid oxidation	713.757	1000	0.714043
C51CPT1_REVNo3	Production of Tiglylcarnitine (reversible) (No3)	1.4172e-07 prot_Q92523 + pmet_C51CPT1_REV -> m02348c + m02999c	Fatty acid oxidation	9720.83	1000	9.71212
C51CRNtr	Transport of Tiglyl Carnitine	c51crn_s -> c51crn_c	Transport reactions	1000	1000	1
C51CRNtr_REV	Transport of Tiglyl Carnitine (reversible)	c51crn_c -> c51crn_s	Transport reactions	1000	1000	1
C5DCe	Transport of Glutaryl Carnitine into the Extra Cellular Fluid	c5dc_c -> c5dc_s	Fatty acid oxidation	1000	1000	1
C5DCtr	Transport of Glutaryl Carnitine	c5dc_s -> c5dc_c	Transport reactions	1000	1000	1
C5DCtr_REV	Transport of Glutaryl Carnitine (reversible)	c5dc_c -> c5dc_s	Transport reactions	1000	1000	1
C60CPT1No1	Production of Hexanoylcarnitine (No1)	9.1374e-06 prot_P50416 + pmet_C60CPT1 -> m01597c + c6crn_c	Fatty acid oxidation	318.836	1000	0.319517
C60CPT1No2	Production of Hexanoylcarnitine (No2)	9.1374e-06 prot_Q8TCG5 + pmet_C60CPT1 -> m01597c + c6crn_c	Fatty acid oxidation	713.757	1000	0.714043
C60CPT1No3	Production of Hexanoylcarnitine (No3)	9.1374e-06 prot_Q92523 + pmet_C60CPT1 -> m01597c + c6crn_c	Fatty acid oxidation	9720.83	1000	9.71212
C60CPT1_REVNo1	Production of Hexanoylcarnitine (reversible) (No1)	1.4172e-07 prot_P50416 + pmet_C60CPT1_REV -> m02122c + m02348c	Fatty acid oxidation	318.836	1000	0.319517
C60CPT1_REVNo2	Production of Hexanoylcarnitine (reversible) (No2)	1.4172e-07 prot_Q8TCG5 + pmet_C60CPT1_REV -> m02122c + m02348c	Fatty acid oxidation	713.757	1000	0.714043
C60CPT1_REVNo3	Production of Hexanoylcarnitine (reversible) (No3)	1.4172e-07 prot_Q92523 + pmet_C60CPT1_REV -> m02122c + m02348c	Fatty acid oxidation	9720.83	1000	9.71212
C6COAtNo1	Esterification of Of Hexanoylcoa for Transport into Cytosol (No1)	m02122p + m02348p + 0.00075689 prot_Q9UKG9 -> m01597p + c6crn_p	Transport reactions	732.704	1000	0.732971
C6COAt_REVNo1	Esterification of Of Hexanoylcoa for Transport into Cytosol (reversible) (No1)	m01597p + c6crn_p + 0.00075689 prot_Q9UKG9 -> m02122p + m02348p	Transport reactions	732.704	1000	0.732971
C6CRNe	Transport of Hexanoyl Carnitine into the Extra Cellular Fluid	c6crn_c -> c6crn_s	Fatty acid oxidation	1000	1000	1
C6CRNtcx	Transport of Hexanoylcarnitine into Cytosol	c6crn_p -> c6crn_c	Transport reactions	445.117	1000	0.445672
C6CRNtcx_REV	Transport of Hexanoylcarnitine into Cytosol (reversible)	c6crn_c -> c6crn_p	Transport reactions	445.117	1000	0.445672
C6CRNtr	Transport of Hexanoyl Carnitine	c6crn_s -> c6crn_c	Transport reactions	1000	1000	1
C6CRNtr_REV	Transport of Hexanoyl Carnitine (reversible)	c6crn_c -> c6crn_s	Transport reactions	1000	1000	1
C6DCCACT	Transport of Adipoyl Carnitine into Cytosol	c6dc_p -> c6dc_c	Fatty acid oxidation	445.117	1000	0.445672
C6DCCACT_REV	Transport of Adipoyl Carnitine into Cytosol (reversible)	c6dc_c -> c6dc_p	Fatty acid oxidation	445.117	1000	0.445672
C6DCcNo1	Production of Adipoylcarnitine (No1)	1.4172e-07 prot_P50416 + pmet_C6DCc -> m01597c + c6dc_c	Fatty acid oxidation	318.836	1000	0.319517
C6DCcNo2	Production of Adipoylcarnitine (No2)	1.4172e-07 prot_Q8TCG5 + pmet_C6DCc -> m01597c + c6dc_c	Fatty acid oxidation	713.757	1000	0.714043
C6DCcNo3	Production of Adipoylcarnitine (No3)	1.4172e-07 prot_Q92523 + pmet_C6DCc -> m01597c + c6dc_c	Fatty acid oxidation	9720.83	1000	9.71212
C6DCc_REVNo1	Production of Adipoylcarnitine (reversible) (No1)	1.4172e-07 prot_P50416 + pmet_C6DCc_REV -> m02348c + adpcoa_c	Fatty acid oxidation	318.836	1000	0.319517
C6DCc_REVNo2	Production of Adipoylcarnitine (reversible) (No2)	1.4172e-07 prot_Q8TCG5 + pmet_C6DCc_REV -> m02348c + adpcoa_c	Fatty acid oxidation	713.757	1000	0.714043
C6DCc_REVNo3	Production of Adipoylcarnitine (reversible) (No3)	1.4172e-07 prot_Q92523 + pmet_C6DCc_REV -> m02348c + adpcoa_c	Fatty acid oxidation	9720.83	1000	9.71212
C6DCe	Transport of Adipoyl Carnitine into the Extra Cellular Fluid	c6dc_c -> c6dc_s	Fatty acid oxidation	1000	1000	1
C6DCtr	Transport of Adipoyl Carnitine	c6dc_s -> c6dc_c	Transport reactions	1000	1000	1
C6DCtr_REV	Transport of Adipoyl Carnitine (reversible)	c6dc_c -> c6dc_s	Transport reactions	1000	1000	1
C81CPT1No1	Production of Ocetenoylcarnitine (No1)	1.4172e-07 prot_P50416 + pmet_C81CPT1 -> m01597c + c81crn_c	Fatty acid oxidation	318.836	1000	0.319517
C81CPT1No2	Production of Ocetenoylcarnitine (No2)	1.4172e-07 prot_Q8TCG5 + pmet_C81CPT1 -> m01597c + c81crn_c	Fatty acid oxidation	713.757	1000	0.714043
C81CPT1No3	Production of Ocetenoylcarnitine (No3)	1.4172e-07 prot_Q92523 + pmet_C81CPT1 -> m01597c + c81crn_c	Fatty acid oxidation	9720.83	1000	9.71212
C81CPT1_REVNo1	Production of Ocetenoylcarnitine (reversible) (No1)	1.4172e-07 prot_P50416 + pmet_C81CPT1_REV -> m02348c + c81coa_c	Fatty acid oxidation	318.836	1000	0.319517
C81CPT1_REVNo2	Production of Ocetenoylcarnitine (reversible) (No2)	1.4172e-07 prot_Q8TCG5 + pmet_C81CPT1_REV -> m02348c + c81coa_c	Fatty acid oxidation	713.757	1000	0.714043
C81CPT1_REVNo3	Production of Ocetenoylcarnitine (reversible) (No3)	1.4172e-07 prot_Q92523 + pmet_C81CPT1_REV -> m02348c + c81coa_c	Fatty acid oxidation	9720.83	1000	9.71212
C81CRNe	Transport of Octenoyl Carnitine into the Extra Cellular Space	c81crn_c -> c81crn_s	Fatty acid oxidation	1000	1000	1
C81CRNtr	Transport of Octenoyl Carnitine	c81crn_s -> c81crn_c	Transport reactions	1000	1000	1
C81CRNtr_REV	Transport of Octenoyl Carnitine (reversible)	c81crn_c -> c81crn_s	Transport reactions	1000	1000	1
C8CRNe	Transport of Octanoyl Carnitine into the Extra Cellular Space	m02409c -> m02409s	Fatty acid oxidation	1000	1000	1
C8CRNtr	Transport of Octanoyl Carnitine	m02409s -> m02409c	Transport reactions	1000	1000	1
C8CRNtr_REV	Transport of Octanoyl Carnitine (reversible)	m02409c -> m02409s	Transport reactions	1000	1000	1
C8DCcNo1	Production of Suberylcarnitine (No1)	1.4172e-07 prot_P50416 + pmet_C8DCc -> m01597c + c8dc_c	Fatty acid oxidation	318.836	1000	0.319517
C8DCcNo2	Production of Suberylcarnitine (No2)	1.4172e-07 prot_Q8TCG5 + pmet_C8DCc -> m01597c + c8dc_c	Fatty acid oxidation	713.757	1000	0.714043
C8DCcNo3	Production of Suberylcarnitine (No3)	1.4172e-07 prot_Q92523 + pmet_C8DCc -> m01597c + c8dc_c	Fatty acid oxidation	9720.83	1000	9.71212
C8DCc_REVNo1	Production of Suberylcarnitine (reversible) (No1)	1.4172e-07 prot_P50416 + pmet_C8DCc_REV -> m02348c + sbcoa_c	Fatty acid oxidation	318.836	1000	0.319517
C8DCc_REVNo2	Production of Suberylcarnitine (reversible) (No2)	1.4172e-07 prot_Q8TCG5 + pmet_C8DCc_REV -> m02348c + sbcoa_c	Fatty acid oxidation	713.757	1000	0.714043
C8DCc_REVNo3	Production of Suberylcarnitine (reversible) (No3)	1.4172e-07 prot_Q92523 + pmet_C8DCc_REV -> m02348c + sbcoa_c	Fatty acid oxidation	9720.83	1000	9.71212
C8DCe	Transport of Suberyl Carnitine into the Extra Cellular Space	c8dc_c -> c8dc_s	Fatty acid oxidation	1000	1000	1
C8DCtr	Transport of Suberyl Carnitine	c8dc_s -> c8dc_c	Transport reactions	1000	1000	1
C8DCtr_REV	Transport of Suberyl Carnitine (reversible)	c8dc_c -> c8dc_s	Transport reactions	1000	1000	1
C9BRxtc	Transport of Dimethylnonanoylcarnitine from Peroxisomes to Cytosol	m00950p -> m00950c	Transport reactions	445.117	1000	0.445672
C9BRxtc_REV	Transport of Dimethylnonanoylcarnitine from Peroxisomes to Cytosol (reversible)	m00950c -> m00950p	Transport reactions	445.117	1000	0.445672
CA24GScNo1	UDP-Glucuronosyltransferase (UGT) cytosolic (cholic acid) (No1)	m01445c + m03109c + 5.0875e-08 prot_Q9Y4X1 -> m03106c + ca24g_c	Bile acid biosynthesis	1000	1000	1
CA24GSrNo1	UDP-Glucuronosyltransferase (UGT) (cholic acid) (No1)	m01445r + m03109r + 5.0875e-08 prot_Q9Y4X1 -> m03106r + ca24g_r	Bile acid biosynthesis	1000	1000	1
CA24Gte	Glucuronidated bile acid excretion (CA-24G)	m01371c + m02040c + ca24g_c -> m01285c + m02039c + m02751c + ca24g_s	Transport reactions	1000	1000	1
CA24Gtr	Glucuronidated Compound Transport (CA-24G)	ca24g_c -> ca24g_r	Transport reactions	1000	1000	1
CA24Gtr_REV	Glucuronidated Compound Transport (CA-24G) (reversible)	ca24g_r -> ca24g_c	Transport reactions	1000	1000	1
CA2t	Calcium (Ca+2) Transport via Diffusion (Extracellular to Cytosol)	m01413s -> m01413c	Transport reactions	1000	1000	1
CA2t_REV	Calcium (Ca+2) Transport via Diffusion (Extracellular to Cytosol) (reversible)	m01413c -> m01413s	Transport reactions	1000	1000	1
CA3Sabc	Cholic acid 3-sulfate ABC bile acid transporter	m01371c + m02040c + ca3s_c -> m01285c + m02039c + m02751c + ca3s_s	Transport reactions	2000	1000	1.999
CA3St	Cholic acid 3-sulfate transport via bicarbonate countertransport	m02046c + ca3s_s -> m02046s + ca3s_c	Transport reactions	1000	1000	1
CA3St_REV	Cholic acid 3-sulfate transport via bicarbonate countertransport (reversible)	m02046s + ca3s_c -> m02046c + ca3s_s	Transport reactions	1000	1000	1
CAATPSNo1	Ca ATPase (No1)	1.8643e-06 prot_P23634 + pmet_CAATPS -> m01285c + m01413s + m02039s + m02751c	Transport reactions	800.863	1000	0.801062
CAATPSNo2	Ca ATPase (No2)	1.8643e-06 prot_Q16720 + pmet_CAATPS -> m01285c + m01413s + m02039s + m02751c	Transport reactions	7315.32	1000	7.30901
CAATPSNo3	Ca ATPase (No3)	1.8643e-06 prot_P20020 + pmet_CAATPS -> m01285c + m01413s + m02039s + m02751c	Transport reactions	4324.91	1000	4.32159
CAATPSNo4	Ca ATPase (No4)	1.8643e-06 prot_Q01814 + pmet_CAATPS -> m01285c + m01413s + m02039s + m02751c	Transport reactions	7315.32	1000	7.30901
CALAtr	Transport of 3-Ureidopropionate	m00923s -> m00923c	Transport reactions	1000	1000	1
CALAtr_REV	Transport of 3-Ureidopropionate (reversible)	m00923c -> m00923s	Transport reactions	1000	1000	1
CAPROICc	Formation of Hexanoic Acid	m02040c + m02122c -> m01597c + m02039c + m02120c	Fatty acid oxidation	1000	1000	1
CARBIBUP_SGLUthv	release of S-carboxy ibuprofen glucuronide into hepatic vein	caribupglu_S_c -> caribupglu_S_s	Drug metabolism	1000	1000	1
CARBIBUP_SGLUthv_REV	release of S-carboxy ibuprofen glucuronide into hepatic vein (reversible)	caribupglu_S_s -> caribupglu_S_c	Drug metabolism	1000	1000	1
CARIBUPGLU_Sitr	CARIBUPGLU_Sitr	caribupglu_S_c -> caribupglu_S_r	Drug metabolism	1000	1000	1
CARIBUPGLU_Sitr_REV	CARIBUPGLU_Sitr (reversible)	caribupglu_S_r -> caribupglu_S_c	Drug metabolism	1000	1000	1
CARIBUP_Rthv	release of R-carboxy ibuprofen into hepatic vein	caribup_R_c -> caribup_R_s	Drug metabolism	1000	1000	1
CARIBUP_Rthv_REV	release of R-carboxy ibuprofen into hepatic vein (reversible)	caribup_R_s -> caribup_R_c	Drug metabolism	1000	1000	1
CARIBUP_SGLUhepNo1	glucuronidation of S-carboxy ibuprofen (No1)	5.0875e-08 prot_P16662 + pmet_CARIBUP_SGLUhep -> m03106r + caribupglu_S_r	Drug metabolism	1000	1000	1
CARIBUP_SGLUhepNo2	glucuronidation of S-carboxy ibuprofen (No2)	5.0875e-08 prot_O60656 + pmet_CARIBUP_SGLUhep -> m03106r + caribupglu_S_r	Drug metabolism	1000	1000	1
CARIBUP_SGLUhepNo3	glucuronidation of S-carboxy ibuprofen (No3)	5.0875e-08 prot_P35503 + pmet_CARIBUP_SGLUhep -> m03106r + caribupglu_S_r	Drug metabolism	1000	1000	1
CARIBUP_Sitr	CARIBUP_Sitr	caribup_s_c -> caribup_s_r	Drug metabolism	1000	1000	1
CARIBUP_Sitr_REV	CARIBUP_Sitr (reversible)	caribup_s_r -> caribup_s_c	Drug metabolism	1000	1000	1
CARIBUP_Sthv	release of S-carboxy ibuprofen into hepatic vein	caribup_s_c -> caribup_s_s	Drug metabolism	1000	1000	1
CARIBUP_Sthv_REV	release of S-carboxy ibuprofen into hepatic vein (reversible)	caribup_s_s -> caribup_s_c	Drug metabolism	1000	1000	1
CARNtr	Transport of Carnosine	m01423s -> m01423c	Transport reactions	1000	1000	1
CARNtr_REV	Transport of Carnosine (reversible)	m01423c -> m01423s	Transport reactions	1000	1000	1
CARPEPT1tc	Transport of L-Carnosine by the Apical Pept1 Amino Acid Transporters	m02039s + m01423s -> m01423c + m02039c	Transport reactions	8.51984	1000	0.00951033
CARhPTtc	Transport of L-Carnosine by Hpt3 Or Hpt4 Peptide Transporter	m01423l -> m01423c	Transport reactions	0	0	1
CASULTNo1	Cholic acid sulfotransferase (No1)	m01445c + m02682c + 0.00053419 prot_Q06520 -> m02039c + m02681c + ca3s_c	Bile acid biosynthesis	1000	1000	1
CATr	Catalase	2 m02041r -> 2 m02040r + m02630r	ROS detoxification	1000	1000	1
CBASPte	Transport of N-Carbamoyl-L-Aspartate	m02559s -> m02559c	Transport reactions	1000	1000	1
CBASPte_REV	Transport of N-Carbamoyl-L-Aspartate (reversible)	m02559c -> m02559s	Transport reactions	1000	1000	1
CBLTDe	Release of B12 by SIMPle Diffusion	m01600c -> m01600s	Transport reactions	1000	1000	1
CBLtle	Transport of Adenosylcobalamin into the Intestine	m01600s -> m01600c	Transport reactions	1000	1000	1
CDCA24GScNo1	UDP-Glucuronosyltransferase (UGT) cytosolic (chenodeoxycholic acid) (No1)	5.0875e-08 prot_Q6UWM9 + pmet_CDCA24GSc -> m03106c + cdca24g_c	Bile acid biosynthesis	1000	1000	1
CDCA24GScNo2	UDP-Glucuronosyltransferase (UGT) cytosolic (chenodeoxycholic acid) (No2)	5.0875e-08 prot_Q9Y4X1 + pmet_CDCA24GSc -> m03106c + cdca24g_c	Bile acid biosynthesis	1000	1000	1
CDCA24GScNo3	UDP-Glucuronosyltransferase (UGT) cytosolic (chenodeoxycholic acid) (No3)	5.0875e-08 prot_P35503 + pmet_CDCA24GSc -> m03106c + cdca24g_c	Bile acid biosynthesis	1000	1000	1
CDCA24GSrNo1	UDP-Glucuronosyltransferase (UGT) (chenodeoxycholic acid) (No1)	5.0875e-08 prot_Q6UWM9 + pmet_CDCA24GSr -> m03106r + cdca24g_r	Bile acid biosynthesis	1000	1000	1
CDCA24GSrNo2	UDP-Glucuronosyltransferase (UGT) (chenodeoxycholic acid) (No2)	5.0875e-08 prot_Q9Y4X1 + pmet_CDCA24GSr -> m03106r + cdca24g_r	Bile acid biosynthesis	1000	1000	1
CDCA24GSrNo3	UDP-Glucuronosyltransferase (UGT) (chenodeoxycholic acid) (No3)	5.0875e-08 prot_P35503 + pmet_CDCA24GSr -> m03106r + cdca24g_r	Bile acid biosynthesis	1000	1000	1
CDCA24Gte	Glucuronidated bile acid excretion (CDCA-24G)	m01371c + m02040c + cdca24g_c -> m01285c + m02039c + m02751c + cdca24g_s	Transport reactions	1000	1000	1
CDCA24Gtr	Glucuronidated Compound Transport (CDCA-24G)	cdca24g_c -> cdca24g_r	Transport reactions	1000	1000	1
CDCA24Gtr_REV	Glucuronidated Compound Transport (CDCA-24G) (reversible)	cdca24g_r -> cdca24g_c	Transport reactions	1000	1000	1
CDCA3GScNo1	UDP-Glucuronosyltransferase (UGT) cytosolic (chenodeoxycholic acid) (No1)	5.0875e-08 prot_Q6UWM9 + pmet_CDCA3GSc -> m03106c + cdca3g_c	Bile acid biosynthesis	1000	1000	1
CDCA3GScNo2	UDP-Glucuronosyltransferase (UGT) cytosolic (chenodeoxycholic acid) (No2)	5.0875e-08 prot_P16662 + pmet_CDCA3GSc -> m03106c + cdca3g_c	Bile acid biosynthesis	1000	1000	1
CDCA3GScNo3	UDP-Glucuronosyltransferase (UGT) cytosolic (chenodeoxycholic acid) (No3)	5.0875e-08 prot_Q9Y4X1 + pmet_CDCA3GSc -> m03106c + cdca3g_c	Bile acid biosynthesis	1000	1000	1
CDCA3GSrNo1	UDP-Glucuronosyltransferase (UGT) ER (chenodeoxycholic acid) (No1)	5.0875e-08 prot_Q6UWM9 + pmet_CDCA3GSr -> m03106r + cdca3g_r	Bile acid biosynthesis	1000	1000	1
CDCA3GSrNo2	UDP-Glucuronosyltransferase (UGT) ER (chenodeoxycholic acid) (No2)	5.0875e-08 prot_P16662 + pmet_CDCA3GSr -> m03106r + cdca3g_r	Bile acid biosynthesis	1000	1000	1
CDCA3GSrNo3	UDP-Glucuronosyltransferase (UGT) ER (chenodeoxycholic acid) (No3)	5.0875e-08 prot_Q9Y4X1 + pmet_CDCA3GSr -> m03106r + cdca3g_r	Bile acid biosynthesis	1000	1000	1
CDCA3Gte	Glucuronidated bile acid excretion (CDCA-3G)	m01371c + m02040c + cdca3g_c -> m01285c + m02039c + m02751c + cdca3g_s	Transport reactions	1000	1000	1
CDCA3Gtr	Glucuronidated Compound Transport (CDCA-3G)	cdca3g_c -> cdca3g_r	Transport reactions	1000	1000	1
CDCA3Gtr_REV	Glucuronidated Compound Transport (CDCA-3G) (reversible)	cdca3g_r -> cdca3g_c	Transport reactions	1000	1000	1
CDCA6AHNo1	Chenodeoxycholic acid 6alpha-hydroxylase (No1)	m02039c + m02555c + m02630c + C02528_c + 0.0022222 prot_P08684 -> m02040c + m02554c + hyochol_c	Bile acid biosynthesis	1000	1000	1
CDPDAGtm	Intracellular Transport	m01427c -> m01427m	Transport reactions	1000	1000	1
CDPDAGtm_REV	Intracellular Transport (reversible)	m01427m -> m01427c	Transport reactions	1000	1000	1
CDSNo1	Phosphatidate Cytidylyltransferase (No1)	3.4722e-05 prot_O95674 + pmet_CDS -> m01427c + m02759c	Glycerophospholipid metabolism	1590.97	1000	1.59038
CDSNo2	Phosphatidate Cytidylyltransferase (No2)	3.4722e-05 prot_Q92903 + pmet_CDS -> m01427c + m02759c	Glycerophospholipid metabolism	887.396	1000	0.887508
CDSmNo1	Phosphatidate Cytidylyltransferase (No1)	3.4722e-05 prot_O95674 + pmet_CDSm -> m02759m + m01427m	Glycerophospholipid metabolism	1000	1000	1
CDSmNo2	Phosphatidate Cytidylyltransferase (No2)	3.4722e-05 prot_Q92903 + pmet_CDSm -> m02759m + m01427m	Glycerophospholipid metabolism	887.396	1000	0.887508
CE0737te	Assumed Passive Diffusion into Extracellular Space	m02441c -> m02441s	Transport reactions	1000	1000	1
CE0737te_REV	Assumed Passive Diffusion into Extracellular Space (reversible)	m02441s -> m02441c	Transport reactions	1000	1000	1
CE0955te	Transport of 6-Oxo-Prostaglandin F1Alpha, Lactate Antiport	m01168c + m02403s -> m02403c + m01168s	Transport reactions	1000	1000	1
CE0955te_REV	Transport of 6-Oxo-Prostaglandin F1Alpha, Lactate Antiport (reversible)	m02403c + m01168s -> m01168c + m02403s	Transport reactions	1000	1000	1
CE0955tr	Transport of 6-Oxo-Prostaglandin F1Alpha, Intracellular	m01168r -> m01168c	Transport reactions	1000	1000	1
CE0955tr_REV	Transport of 6-Oxo-Prostaglandin F1Alpha, Intracellular (reversible)	m01168c -> m01168r	Transport reactions	1000	1000	1
CE1243ATP	Transport of 12S-HHT, FATP	m00308c + m01371c + m02040c -> m01285c + m02039c + m02751c + m00308s	Transport reactions	1000	1000	1
CE1243UPKt	Transport of 12S-HHT by Diffusion	m00308s -> m00308c	Transport reactions	1000	1000	1
CE1261t	Transport of 5-S-Cysteinyldopa	m01134c -> m01134s	Transport reactions	1000	1000	1
CE1261t_REV	Transport of 5-S-Cysteinyldopa (reversible)	m01134s -> m01134c	Transport reactions	1000	1000	1
CE1273t1	Transport of 5Beta-Cholestane-3Alpha, 7Alpha, 12Alpha, 24S, 25-Pentol, Active Transport	m01371c + m02040c + m01087c -> m01285c + m02039c + m02751c + m01087s	Transport reactions	1000	1000	1
CE1273t2	Transport of 5Beta-Cholestane-3Alpha, 7Alpha, 12Alpha, 24S, 25-Pentol, Atiport with Bicarbonate	m02046s + m01087c -> m02046c + m01087s	Transport reactions	1000	1000	1
CE1273t2_REV	Transport of 5Beta-Cholestane-3Alpha, 7Alpha, 12Alpha, 24S, 25-Pentol, Atiport with Bicarbonate (reversible)	m02046c + m01087s -> m02046s + m01087c	Transport reactions	1000	1000	1
CE1297t	Active Transport of 8-Dehydrocholesterol	m01371c + m02040c + CE1297_c -> m01285c + m02039c + m02751c + CE1297_s	Transport reactions	1000	1000	1
CE1297td	Transport of 8-Dehydrocholesterol, Diffusion	CE1297_c -> CE1297_s	Transport reactions	1000	1000	1
CE1297td_REV	Transport of 8-Dehydrocholesterol, Diffusion (reversible)	CE1297_s -> CE1297_c	Transport reactions	1000	1000	1
CE1352teNo1	Transport of 17Alpha-Hydroxypregnenolone Sulfate, Extracellular (No1)	m00407c + m01371c + m02040c + 9.4162e-05 prot_P08183 -> m01285c + m02039c + m02751c + m00407s	Transport reactions	92.5865	1000	0.093493
CE1401te	Transport of HomocysteineThiolactone	m02134c -> m02134s	Transport reactions	1000	1000	1
CE1401te_REV	Transport of HomocysteineThiolactone (reversible)	m02134s -> m02134c	Transport reactions	1000	1000	1
CE1447te	Transport (ATP-Dependent) into Extracellular Space	m00293c + m01371c + m02040c -> m01285c + m02039c + m02751c + m00293s	Transport reactions	1000	1000	1
CE1554t	Transport of Acetyl-Alanine	m02530c -> m02530s	Transport reactions	1000	1000	1
CE1554t_REV	Transport of Acetyl-Alanine (reversible)	m02530s -> m02530c	Transport reactions	1000	1000	1
CE1556td	Transport of N-Acetyl-L-Asparagine	m02531c -> m02531s	Transport reactions	1000	1000	1
CE1556td_REV	Transport of N-Acetyl-L-Asparagine (reversible)	m02531s -> m02531c	Transport reactions	1000	1000	1
CE1617te	Transport of 9-Cis-Retinoate	m01231c -> m01231s	Transport reactions	1000	1000	1
CE1617te_REV	Transport of 9-Cis-Retinoate (reversible)	m01231s -> m01231c	Transport reactions	1000	1000	1
CE1918te	Transport by Oat1/Oat3 into Extracellular Space	m01306c + m01110s -> m01110c + m01306s	Transport reactions	1000	1000	1
CE1918te_REV	Transport by Oat1/Oat3 into Extracellular Space (reversible)	m01110c + m01306s -> m01306c + m01110s	Transport reactions	1000	1000	1
CE2006te	Transport (ATP-Dependent) into Extracellular Space	m00988c + m01371c + m02040c -> m01285c + m02039c + m02751c + m00988s	Transport reactions	312.808	1000	0.313495
CE2026te	3-Methyl-Crotonyl-Glycine Transport, Extracellular	m01442c + 3 m02519c + m00825c -> m01442s + 3 m02519s + m00825s	Transport reactions	1000	1000	1
CE2026te_REV	3-Methyl-Crotonyl-Glycine Transport, Extracellular (reversible)	m01442s + 3 m02519s + m00825s -> m01442c + 3 m02519c + m00825c	Transport reactions	1000	1000	1
CE2026tm	3-Methyl-Crotonyl-Glycine Transport, Mitochondrial	m00825m -> m00825c	Transport reactions	1000	1000	1
CE2028t	Transport for Beta-Hydroxy-Beta-Methylbutyrate	m01392c -> m01392s	Transport reactions	1000	1000	1
CE2028t_REV	Transport for Beta-Hydroxy-Beta-Methylbutyrate (reversible)	m01392s -> m01392c	Transport reactions	1000	1000	1
CE2047te	Transport (ATP-Dependent) into Extracellular Space	m01220c + m01371c + m02040c -> m01285c + m02039c + m02751c + m01220s	Transport reactions	1000	1000	1
CE2049te	Transport (ATP-Dependent) into Extracellular Space	m00314c + m01371c + m02040c -> m01285c + m02039c + m02751c + m00314s	Transport reactions	1000	1000	1
CE2172t	Transport of 6, 7-Dihydroxy-1, 2, 3, 4-Tetrahydroisoquinoline	m01154c -> m01154s	Transport reactions	1000	1000	1
CE2172t_REV	Transport of 6, 7-Dihydroxy-1, 2, 3, 4-Tetrahydroisoquinoline (reversible)	m01154s -> m01154c	Transport reactions	1000	1000	1
CE2176t	Transport of 3-O-Methyldopa	m02360c + m00830s -> m00830c + m02360s	Transport reactions	1000	1000	1
CE2176t_REV	Transport of 3-O-Methyldopa (reversible)	m00830c + m02360s -> m02360c + m00830s	Transport reactions	1000	1000	1
CE2176tm	Transport of 3-Methoxy-Tyrosine into Mitochondrial	m00830c -> m00830m	Transport reactions	1000	1000	1
CE2209teNo1	Transport of 5Alpha-Androstane-3Alpha, 17Beta-Diol, Extracellular (No1)	m01065c + m01371c + m02040c + 9.4162e-05 prot_P08183 -> m01285c + m02039c + m02751c + m01065s	Transport reactions	92.5865	1000	0.093493
CE2211teNo1	Transport of Allopregnanolone, Extracellular (No1)	m01314c + m01371c + m02040c + 9.4162e-05 prot_P08183 -> m01285c + m02039c + m02751c + m01314s	Transport reactions	92.5865	1000	0.093493
CE2445t	Transport of 6-Trans-Leukotriene B4, Active Transport	m01172c + m01371c + m02040c -> m01285c + m02039c + m02751c + m01172s	Transport reactions	798.934	1000	0.799135
CE2510ABCtNo1	Transport of 11-Cis-Eicosenoate, Active (No1)	4.6296e-05 prot_Q9Y2P5 + pmet_CE2510ABCt -> m01285c + m01584c + m02039c + m02751c	Transport reactions	612.069	1000	0.612457
CE2510ABCtNo2	Transport of 11-Cis-Eicosenoate, Active (No2)	4.6296e-05 prot_Q9Y2P4 + pmet_CE2510ABCt -> m01285c + m01584c + m02039c + m02751c	Transport reactions	993.246	1000	0.993253
CE2510ABCtNo3	Transport of 11-Cis-Eicosenoate, Active (No3)	4.6296e-05 prot_Q6PCB7 + pmet_CE2510ABCt -> m01285c + m01584c + m02039c + m02751c	Transport reactions	3209.24	1000	3.20703
CE2510ABCtNo4	Transport of 11-Cis-Eicosenoate, Active (No4)	4.6296e-05 prot_O14975 + pmet_CE2510ABCt -> m01285c + m01584c + m02039c + m02751c	Transport reactions	51.5675	1000	0.052515
CE2510ABCtNo5	Transport of 11-Cis-Eicosenoate, Active (No5)	4.6296e-05 prot_Q5K4L6 + pmet_CE2510ABCt -> m01285c + m01584c + m02039c + m02751c	Transport reactions	3396.46	1000	3.39407
CE2510ABCtNo6	Transport of 11-Cis-Eicosenoate, Active (No6)	4.6296e-05 prot_Q6P1M0 + pmet_CE2510ABCt -> m01285c + m01584c + m02039c + m02751c	Transport reactions	915.21	1000	0.915294
CE2516t	Transport of (8Z, 11Z, 14Z)-Eicosatrienoic Acid, Active Transport	m01371c + m02040c + CE2516_c -> m01285c + m02039c + m02751c + CE2516_s	Transport reactions	0	0	1
CE2537ABCtNo1	Transport of 15-Hydroxy- (8Z, 11Z, 13E)-Eicosatrienoate, Active (No1)	4.6296e-05 prot_Q9Y2P5 + pmet_CE2537ABCt -> m00378c + m01285c + m02039c + m02751c	Transport reactions	612.069	1000	0.612457
CE2537ABCtNo2	Transport of 15-Hydroxy- (8Z, 11Z, 13E)-Eicosatrienoate, Active (No2)	4.6296e-05 prot_Q9Y2P4 + pmet_CE2537ABCt -> m00378c + m01285c + m02039c + m02751c	Transport reactions	993.246	1000	0.993253
CE2537ABCtNo3	Transport of 15-Hydroxy- (8Z, 11Z, 13E)-Eicosatrienoate, Active (No3)	4.6296e-05 prot_Q6PCB7 + pmet_CE2537ABCt -> m00378c + m01285c + m02039c + m02751c	Transport reactions	1062.84	1000	1.06277
CE2537ABCtNo4	Transport of 15-Hydroxy- (8Z, 11Z, 13E)-Eicosatrienoate, Active (No4)	4.6296e-05 prot_O14975 + pmet_CE2537ABCt -> m00378c + m01285c + m02039c + m02751c	Transport reactions	51.5675	1000	0.052515
CE2537ABCtNo5	Transport of 15-Hydroxy- (8Z, 11Z, 13E)-Eicosatrienoate, Active (No5)	4.6296e-05 prot_Q5K4L6 + pmet_CE2537ABCt -> m00378c + m01285c + m02039c + m02751c	Transport reactions	1062.84	1000	1.06277
CE2537ABCtNo6	Transport of 15-Hydroxy- (8Z, 11Z, 13E)-Eicosatrienoate, Active (No6)	4.6296e-05 prot_Q6P1M0 + pmet_CE2537ABCt -> m00378c + m01285c + m02039c + m02751c	Transport reactions	915.21	1000	0.915294
CE2537ATP	Transport of 15-Hydroxy- (8Z, 11Z, 13E)-Eicosatrienoate, Active Transport	m00378c + m01371c + m02040c -> m01285c + m02039c + m02751c + m00378s	Transport reactions	1000	1000	1
CE2705t	Transport by Ent1/Ent2 into Extracellular Space	m02823s -> m02823c	Transport reactions	8696.12	1000	8.68843
CE2705t_REV	Transport by Ent1/Ent2 into Extracellular Space (reversible)	m02823c -> m02823s	Transport reactions	8696.12	1000	8.68843
CE2934t	Transport of O-Methylhippurate, Extracellular	m02654c -> m02654s	Transport reactions	1000	1000	1
CE2934t_REV	Transport of O-Methylhippurate, Extracellular (reversible)	m02654s -> m02654c	Transport reactions	1000	1000	1
CE4843HYDc	Acylcoa Hydrolase, Cis, Cis-11, 14-Eicosadienoyl Coenzyme A	m00009c + m02040c -> m01597c + m02039c + eidi1114ac_c	Fatty acid oxidation	1000	1000	1
CE4843t	Transport of Cis, Cis-11, 14-Eicosadienoyl Coenzyme A, Active Transport	m01371c + m02040c + eidi1114ac_c -> m01285c + m02039c + m02751c + eidi1114ac_s	Transport reactions	1000	1000	1
CE4843td	Transport of Cis, Cis-11, 14-Eicosadienoyl Coenzyme A, Diffusion	eidi1114ac_c -> eidi1114ac_s	Transport reactions	1000	1000	1
CE4843td_REV	Transport of Cis, Cis-11, 14-Eicosadienoyl Coenzyme A, Diffusion (reversible)	eidi1114ac_s -> eidi1114ac_c	Transport reactions	1000	1000	1
CE4877te	Transport (ATP-Dependent) into Extracellular Space	m00385c + m01371c + m02040c -> m01285c + m02039c + m02751c + m00385s	Transport reactions	1000	1000	1
CE4890te	Transport by Pmat Transporter into Extracellular Space	m02039c + m02603c -> m02039s + m02603s	Transport reactions	1065.37	1000	1.0653
CE4890te2	Facilitated Diffusion Through Uniport Oct2 into Extracellular Space	m02603c -> m02603s	Transport reactions	246.895	1000	0.247647
CE4890te2_REV	Facilitated Diffusion Through Uniport Oct2 into Extracellular Space (reversible)	m02603s -> m02603c	Transport reactions	246.895	1000	0.247647
CE4890te_REV	Transport by Pmat Transporter into Extracellular Space (reversible)	m02039s + m02603s -> m02039c + m02603c	Transport reactions	1065.37	1000	1.0653
CE4968te	Isovalerylglycine Transport, Extracellular	m01442c + 3 m02519c + m02190c -> m01442s + 3 m02519s + m02190s	Transport reactions	1000	1000	1
CE4968te_REV	Isovalerylglycine Transport, Extracellular (reversible)	m01442s + 3 m02519s + m02190s -> m01442c + 3 m02519c + m02190c	Transport reactions	1000	1000	1
CE4968tm	Isovalerylglycine Transport, Mitochondrial	m02190m -> m02190c	Transport reactions	1000	1000	1
CE4970te	2-Methylbutyrylglycine Transport, Extracellular	m01442c + 3 m02519c + m00664c -> m01442s + 3 m02519s + m00664s	Transport reactions	1000	1000	1
CE4970te_REV	2-Methylbutyrylglycine Transport, Extracellular (reversible)	m01442s + 3 m02519s + m00664s -> m01442c + 3 m02519c + m00664c	Transport reactions	1000	1000	1
CE4970tm	2-Methylbutyrylglycine Transport, Mitochondrial	m00664m -> m00664c	Transport reactions	1000	1000	1
CE5025t	Transport of 5-S-Glutathionyl-Dopamine	m01138c + m01371c + m02040c -> m01285c + m02039c + m02751c + m01138s	Transport reactions	766.479	1000	0.766712
CE5026t	Transport of 5-S-Glutathionyl-L-Dopa	m01139c + m01371c + m02040c -> m01285c + m02039c + m02751c + m01139s	Transport reactions	766.479	1000	0.766712
CE5072teNo1	Transport of 21-Hydroxyallopregnanolone, Extracellular (No1)	m00604c + m01371c + m02040c + 9.4162e-05 prot_P08183 -> m01285c + m02039c + m02751c + m00604s	Transport reactions	92.5865	1000	0.093493
CE5304t	Transport of 15-Deoxy-Pgd2, Antiport with Lactate	m00384c + m02403s -> m02403c + m00384s	Transport reactions	1000	1000	1
CE5304t_REV	Transport of 15-Deoxy-Pgd2, Antiport with Lactate (reversible)	m02403c + m00384s -> m00384c + m02403s	Transport reactions	1000	1000	1
CE5629t	Transport of 6, 7-Dihydroxy-1, 2, 3, 4-Tetrahydroisoquinoline	m00231c -> m00231s	Transport reactions	1000	1000	1
CE5629t_REV	Transport of 6, 7-Dihydroxy-1, 2, 3, 4-Tetrahydroisoquinoline (reversible)	m00231s -> m00231c	Transport reactions	1000	1000	1
CE5643te	Peroxynitrite Diffusion, Cytosol	m02714c -> m02714s	Transport reactions	1000	1000	1
CE5643te_REV	Peroxynitrite Diffusion, Cytosol (reversible)	m02714s -> m02714c	Transport reactions	1000	1000	1
CE6031t	Transport of Androsterone Sulfate	m01337c -> m01337s	Transport reactions	1000	1000	1
CE6031t_REV	Transport of Androsterone Sulfate (reversible)	m01337s -> m01337c	Transport reactions	1000	1000	1
CE6205te	5-Methoxytryptophol Transport, Cytosol	m01113c -> m01113s	Transport reactions	1000	1000	1
CE6205te_REV	5-Methoxytryptophol Transport, Cytosol (reversible)	m01113s -> m01113c	Transport reactions	1000	1000	1
CE6247t	Transport of 5, 12, 20-Trihete, Active Transport	m01047c + m01371c + m02040c -> m01285c + m02039c + m02751c + m01047s	Transport reactions	1000	1000	1
CE7081tm	Transport of 15(R)-HEPE, Extracellular Space, Active Transport	m00373c + m01371c + m02040c -> m01285c + m02039c + m02751c + m00373s	Transport reactions	1000	1000	1
CE7081tr	Transport of 15(R)-HEPE, Endoplasmatic Reticulum, Active Transport	m00373r + m01371r + m02040r -> m00373c + m01285r + m02039r + m02751r	Transport reactions	1000	1000	1
CE7082ATP	Transport of 15(S)-HEPE, Active Transport	m00376c + m01371c + m02040c -> m01285c + m02039c + m02751c + m00376s	Transport reactions	1000	1000	1
CE7082UPKt	Transport of 15(S)-HEPE, Diffusion	m00376s -> m00376c	Transport reactions	1000	1000	1
CE7083t	Transport of Leukotriene B5, Active Transport	m01371c + m02040c + m02365c -> m01285c + m02039c + m02751c + m02365s	Transport reactions	989.323	1000	0.989334
CE7085te	Transport (ATP-Dependent) into Extracellular Space	m01039c + m01371c + m02040c -> m01285c + m02039c + m02751c + m01039s	Transport reactions	1000	1000	1
CE7090te	Transport (ATP-Dependent) into Extracellular Space	m00028c + m01371c + m02040c -> m01285c + m02039c + m02751c + m00028s	Transport reactions	1000	1000	1
CE7096te	Transport (ATP-Dependent) into Extracellular Space	m01050c + m01371c + m02040c -> m01285c + m02039c + m02751c + m01050s	Transport reactions	1000	1000	1
CE7172ATP	Transport of 14, 15-DIHETE, Active Transport	m00365c + m01371c + m02040c -> m01285c + m02039c + m02751c + m00365s	Transport reactions	1000	1000	1
CE7172UPKt	Transport of 14, 15-DIHETE, Diffusion	m00365s -> m00365c	Transport reactions	1000	1000	1
CERT1tn	Ceramide Transport Protei	m01430c -> m01430n	Transport reactions	1000	1000	1
CERT1tn_REV	Ceramide Transport Protei (reversible)	m01430n -> m01430c	Transport reactions	1000	1000	1
CH4Ste	Assumed Passive Diffusion into Extracellular Space	ch4s_c -> ch4s_s	Transport reactions	1000	1000	1
CH4Ste_REV	Assumed Passive Diffusion into Extracellular Space (reversible)	ch4s_s -> ch4s_c	Transport reactions	1000	1000	1
CHOLPtn	Choline Phosphate Intracellular Transport	m02738c -> m02738n	Transport reactions	1000	1000	1
CHOLPtn_REV	Choline Phosphate Intracellular Transport (reversible)	m02738n -> m02738c	Transport reactions	1000	1000	1
CHOLPtr	Transport of Choline Phosphate	m02738s -> m02738c	Transport reactions	1000	1000	1
CHOLPtr_REV	Transport of Choline Phosphate (reversible)	m02738c -> m02738s	Transport reactions	1000	1000	1
CHSTEROLSte	Transport of Cholesterol Sulfate, Extracellular Space, within Lipoproteins	m01512c -> m01512s	Transport reactions	1000	1000	1
CHSTEROLt2	Cholesterol Intracellular Transport	m01450r -> m01450m	Transport reactions	1000	1000	1
CHSTEROLt2_REV	Cholesterol Intracellular Transport (reversible)	m01450m -> m01450r	Transport reactions	1000	1000	1
CHYLO_HSSEC	Secretion of Chylomicron	chylo_hs_c -> chylo_hs_s	Glycerophospholipid metabolism	0	0	1
CITLNo1	Citrate Lyase (No1)	m01587c + 2.3742e-06 prot_Q8N0X4 -> m01252c + m02633c	Tricarboxylic acid cycle and glyoxylate/dicarboxylate metabolism	3819.52	1000	3.8167
CITRtm	Citrulline Mitochondrial Transport via Proton Antiport	m01588m -> m01588c	Transport reactions	592.477	1000	0.592884
CITRtm_REV	Citrulline Mitochondrial Transport via Proton Antiport (reversible)	m01588c -> m01588m	Transport reactions	592.477	1000	0.592884
CITtam	Citrate Transport, Mitochondrial	m01587c + m02439m -> m01587m + m02439c	Transport reactions	561.038	1000	0.561477
CITtam_REV	Citrate Transport, Mitochondrial (reversible)	m01587m + m02439c -> m01587c + m02439m	Transport reactions	561.038	1000	0.561477
CLCFTRtm	CLCFTRtm	m01442c -> m01442m	Transport reactions	1000	1000	1
CLCFTRtm_REV	CLCFTRtm (reversible)	m01442m -> m01442c	Transport reactions	1000	1000	1
CLOHtex2	Chloride Transport via Hydroxide Antiport (2:1)	2 m01442s + m02040c -> 2 m01442c + m02040s	Transport reactions	617.921	1000	0.618302
CLPNDCOAtx	Fatty Acid Intracellular Transport	m00121c -> m00121p	Transport reactions	1000	1000	1
CLPNDCOAtx_REV	Fatty Acid Intracellular Transport (reversible)	m00121p -> m00121c	Transport reactions	1000	1000	1
CLPNDCRNt	Transport into the Mitochondria (Carnitine)	m00120c -> m00120m	Fatty acid oxidation	445.117	1000	0.445672
CLPNDCRNt_REV	Transport into the Mitochondria (Carnitine) (reversible)	m00120m -> m00120c	Fatty acid oxidation	445.117	1000	0.445672
CLS_hsNo1	Cardiolipin Synthase (Homo Sapiens) (No1)	m02715c + m01426c + 0.00017921 prot_Q9UJA2 -> m01589c + m01590c + m02039c	Glycerophospholipid metabolism	0.737093	4.9231	0.293274
CO2tn	CO2 Nuclear Transport via Diffusion	m01596n -> m01596c	Transport reactions	1000	1000	1
CO2tn_REV	CO2 Nuclear Transport via Diffusion (reversible)	m01596c -> m01596n	Transport reactions	1000	1000	1
COKEte	Transport of Cocaine	m01601s -> m01601c	Transport reactions	1000	1000	1
COKEte_REV	Transport of Cocaine (reversible)	m01601c -> m01601s	Transport reactions	1000	1000	1
COKEtr	Transport of Cocaine, Endoplasmic Reticulum	m01601c -> m01601r	Transport reactions	1000	1000	1
COKEtr_REV	Transport of Cocaine, Endoplasmic Reticulum (reversible)	m01601r -> m01601c	Transport reactions	1000	1000	1
COPROSTabc	Coprostanol ABC bile acid transporter	m01371c + m02040c + coprost_c -> m01285c + m02039c + m02751c + coprost_s	Transport reactions	3755.26	1000	3.7525
COPROSTt	Coprostanol transport via bicarbonate countertransport	m02046c + coprost_s -> m02046s + coprost_c	Transport reactions	2755.26	1000	2.7535
COPROSTt2	Coprostanol transport via sodium cotransport	2 m02519s + coprost_s -> 2 m02519c + coprost_c	Transport reactions	1000	1000	1
COPROSTt_REV	Coprostanol transport via bicarbonate countertransport (reversible)	m02046s + coprost_c -> m02046c + coprost_s	Transport reactions	2755.26	1000	2.7535
COQ3mNo1	Methyltransferase Coq3 (No1)	m02877m + 2dpmhobq_m + 3.1566e-06 prot_Q9NZJ6 -> m02039m + m02871m + m03103m	Ubiquinone synthesis	160.823	166.667	0.96515
COQ5m	Ubiquinone Biosynthesis Methyltransferase Coq5	m02877m + 2dp6mobq_m -> m02039m + m02871m + 2dp6mobq_me_m	Ubiquinone synthesis	160.823	166.667	0.96515
COQ6mNo1	Ubiquinone Biosynthesis Monooxgenase Coq6 (No1)	m00657m + m02630m + 6.5669e-06 prot_Q9Y2Z9 -> m02040m + 2dp6mobq_m	Ubiquinone synthesis	160.823	166.667	0.96515
COQ7mNo1	Ubiquinone Biosynthesis Coq7 (No1)	m02039m + m02555m + m02630m + 2dp6mobq_me_m + 1.177e-05 prot_Q99807 -> m02040m + m02554m + 2dpmhobq_m	Ubiquinone synthesis	160.823	166.667	0.96515
CORE4t	Core4 (Mucin O-Glycan) Export	m01609g -> m01609s	Transport reactions	274.364	333.333	0.823622
CORE5t	Core5 (Mucin O-Glycan) Export	m01610g -> m01610s	Transport reactions	1000	1000	1
CORE7t	Core7 (Mucin O-Glycan) Export	m01612g -> m01612s	Transport reactions	1000	1000	1
CORE8t	Core8 (Mucin O-Glycan) Export	m01613g -> m01613s	Transport reactions	1000	1000	1
CORTSNt	Extracellular Transport of Cortisone	m01616c -> m01616s	Transport reactions	1000	1000	1
CORTSNt_REV	Extracellular Transport of Cortisone (reversible)	m01616s -> m01616c	Transport reactions	1000	1000	1
CORTSNti	Intracellular Transport of Cortisone	m01616r -> m01616c	Transport reactions	1000	1000	1
CORTSNti_REV	Intracellular Transport of Cortisone (reversible)	m01616c -> m01616r	Transport reactions	1000	1000	1
COUCOAFm	P-Coumaroyl Coenzyme A Formation	m01371m + m01597m + m00981m -> m01334m + m02759m + m00982m	Ubiquinone synthesis	1000	1000	1
CRGLZABCt	excretion of carboxy-gliclazide into bile	m01371c + m02040c + crglz_c -> m01285c + m02039c + m02751c + crglz_s	Drug metabolism	1000	1000	1
CRGLZhr	oxidation of methyl-hydroxy-gliclazide to carboxy-gliclazide in hepatocytes	m02630r + mhglz_r -> m02039r + m02040r + crglz_r	Drug metabolism	1000	1000	1
CRGLZitr	CRGLZitr	crglz_r -> crglz_c	Drug metabolism	1000	1000	1
CRGLZitr_REV	CRGLZitr (reversible)	crglz_c -> crglz_r	Drug metabolism	1000	1000	1
CRGLZtev	excretion of carboxy-gliclazide into hepatic vein	crglz_c -> crglz_s	Drug metabolism	1000	1000	1
CRGLZtev_REV	excretion of carboxy-gliclazide into hepatic vein (reversible)	crglz_s -> crglz_c	Drug metabolism	1000	1000	1
CRMPte	Crmp Hs Transport	m01431c -> m01431s	Transport reactions	1000	1000	1
CRMPte_REV	Crmp Hs Transport (reversible)	m01431s -> m01431c	Transport reactions	1000	1000	1
CRMte	Ceramide Diffusion	m01430s -> m01430c	Sphingolipid metabolism	1000	1000	1
CRMte_REV	Ceramide Diffusion (reversible)	m01430c -> m01430s	Sphingolipid metabolism	1000	1000	1
CRNATBtc	Carnitine Transport by Atb0	m01442s + m02348s + 2 m02519s -> m01442c + m02348c + 2 m02519c	Transport reactions	1000	1000	1
CRNtHa	L-Carnitine Outward Transport (H+ Antiport)	m02039s + m02348c -> m02039c + m02348s	Transport reactions	384.424	1000	0.385039
CRNtx	Carnitine Transport Peroxisome to Mitochondria	m00950p -> m00950m	Transport reactions	1000	1000	1
CRNtx_REV	Carnitine Transport Peroxisome to Mitochondria (reversible)	m00950m -> m00950p	Transport reactions	1000	1000	1
CRVS1M24hcNo1	hydroxylation of cerivastatin-M1 to M24 in hepatocytes (No1)	0.00010808 prot_P10632 + pmet_CRVS1M24hc -> m02040r + m02554r + crvsm24_r	Drug metabolism	355.62	1000	0.356264
CRVS1M24hcNo2	hydroxylation of cerivastatin-M1 to M24 in hepatocytes (No2)	0.0022222 prot_P08684 + pmet_CRVS1M24hc -> m02040r + m02554r + crvsm24_r	Drug metabolism	1000	1000	1
CRVS1tev	exit of cerivastatin-M1 into hepatic vein	crvsm1_c -> crvsm1_s	Drug metabolism	1000	1000	1
CRVS1tev_REV	exit of cerivastatin-M1 into hepatic vein (reversible)	crvsm1_s -> crvsm1_c	Drug metabolism	1000	1000	1
CRVS23M24hcNo1	demethylation of cerivastatin-M23 to M24 in hepatocytes (No1)	0.00010808 prot_P10632 + pmet_CRVS23M24hc -> m02041r + m02554r + m02877r + crvsm24_r	Drug metabolism	355.62	1000	0.356264
CRVS23M24hcNo2	demethylation of cerivastatin-M23 to M24 in hepatocytes (No2)	0.0022222 prot_P08684 + pmet_CRVS23M24hc -> m02041r + m02554r + m02877r + crvsm24_r	Drug metabolism	355.62	1000	0.356264
CRVSATPthc	cerivastatin uptake by hepatocytes by active transport	m01371c + m02040c + crvs_s -> m01285c + m02039c + m02751c + crvs_c	Drug metabolism	1000	1000	1
CRVSATPtuNo1	efflux of cerivastatin by P-gp or BCRP from the enterocytes into lumen (No1)	9.4162e-05 prot_P08183 + pmet_CRVSATPtu -> m01285c + m02039c + m02751c + crvs_s	Drug metabolism	92.5865	1000	0.093493
CRVSATPtuNo2	efflux of cerivastatin by P-gp or BCRP from the enterocytes into lumen (No2)	9.4162e-05 prot_Q9UNQ0 + pmet_CRVSATPtu -> m01285c + m02039c + m02751c + crvs_s	Drug metabolism	584.977	1000	0.585391
CRVSM1SPhc	de-lactonization of cerivastatin-M22 to cerivastatin-M1 in hepatocytes	m02039c + m02040c + m02871c + crvsm22_c -> m02877c + crvsm1_c	Drug metabolism	1000	1000	1
CRVSM1hcNo1	demethylation of cerivastatin to M1 in hepatocytes (No1)	0.00010808 prot_P10632 + pmet_CRVSM1hc -> m02041r + m02554r + m02877r + crvsm1_r	Drug metabolism	355.62	1000	0.356264
CRVSM1hcNo2	demethylation of cerivastatin to M1 in hepatocytes (No2)	0.0022222 prot_P08684 + pmet_CRVSM1hc -> m02041r + m02554r + m02877r + crvsm1_r	Drug metabolism	1000	1000	1
CRVSM1hrNo1	beta-glucuronidase of cerivastatin-M1-glucuronide to M1 form (No1)	m02040r + cvm1gluc_r + 1.0064e-06 prot_P08236 -> m01973r + crvsm1_r	Drug metabolism	1000	1000	1
CRVSM1teb	efflux of cerivastatin-M1 into bile	m01371c + m02040c + crvsm1_c -> m01285c + m02039c + m02751c + crvsm1_s	Drug metabolism	584.977	1000	0.585391
CRVSM22hc	spontaneous conversion of glucuronide to cerivastatin-M22 in hepatocytes	m02877r + cvm1gluc_r -> m01973r + m02039r + m02871r + crvsm22_r	Drug metabolism	1000	1000	1
CRVSM22itr	CRVSM22itr	crvsm22_r -> crvsm22_c	Drug metabolism	1000	1000	1
CRVSM22itr_REV	CRVSM22itr (reversible)	crvsm22_c -> crvsm22_r	Drug metabolism	1000	1000	1
CRVSM23hcNo1	hydroxylation of cerivastatin to M23 in hepatocytes (No1)	m02039r + m02555r + m02630r + crvs_r + 0.00010808 prot_P10632 -> m02040r + m02554r + crvsm23_r	Drug metabolism	355.62	1000	0.356264
CRVSM23hrNo1	beta-glucuronidase of cerivastatin-M23-glucuronide to M23 form (No1)	m02040r + cvm23gluc_r + 1.0064e-06 prot_P08236 -> m01973r + crvsm23_r	Drug metabolism	1000	1000	1
CRVSM23teb	efflux of cerivastatin-M23 into bile	m01371c + m02040c + crvsm23_c -> m01285c + m02039c + m02751c + crvsm23_s	Drug metabolism	584.977	1000	0.585391
CRVSM23tev	exit of cerivastatin-M23 into hepatic vein	crvsm23_c -> crvsm23_s	Drug metabolism	1000	1000	1
CRVSM23tev_REV	exit of cerivastatin-M23 into hepatic vein (reversible)	crvsm23_s -> crvsm23_c	Drug metabolism	1000	1000	1
CRVSM24itr	CRVSM24itr	crvsm24_r -> crvsm24_c	Drug metabolism	1000	1000	1
CRVSM24itr_REV	CRVSM24itr (reversible)	crvsm24_c -> crvsm24_r	Drug metabolism	1000	1000	1
CRVSM24teb	efflux of cerivastatin-M24 into bile	m01371c + m02040c + crvsm24_c -> m01285c + m02039c + m02751c + crvsm24_s	Drug metabolism	584.977	1000	0.585391
CRVSM24tev	exit of cerivastatin-M24 into hepatic vein	crvsm24_c -> crvsm24_s	Drug metabolism	1000	1000	1
CRVSM24tev_REV	exit of cerivastatin-M24 into hepatic vein (reversible)	crvsm24_s -> crvsm24_c	Drug metabolism	1000	1000	1
CRVSM31hc	spontaneous conversion of glucuronide to cerivastatin-M31 in hepatocytes	m02877r + cvm23gluc_r -> m01973r + m02039r + m02871r + crvsm31_r	Drug metabolism	355.62	1000	0.356264
CRVSM31itr	CRVSM31itr	crvsm31_c -> crvsm31_r	Drug metabolism	1000	1000	1
CRVSM31itr_REV	CRVSM31itr (reversible)	crvsm31_r -> crvsm31_c	Drug metabolism	1000	1000	1
CRVSitr	CRVSitr	crvs_c -> crvs_r	Drug metabolism	1000	1000	1
CRVSitr_REV	CRVSitr (reversible)	crvs_r -> crvs_c	Drug metabolism	1000	1000	1
CRVSthc	cerivastatin uptake by hepatocytes	m02046c + crvs_s -> m02046s + crvs_c	Drug metabolism	1000	1000	1
CRVSthc_REV	cerivastatin uptake by hepatocytes (reversible)	m02046s + crvs_c -> m02046c + crvs_s	Drug metabolism	1000	1000	1
CRVStu	cerivastatin uptake by enterocytes	crvs_s -> crvs_c	Drug metabolism	1000	1000	1
CRVStu_REV	cerivastatin uptake by enterocytes (reversible)	crvs_c -> crvs_s	Drug metabolism	1000	1000	1
CSASULPhc	conjugation of cyclosporine with sulphate for excretion in hepatocytes	m02682c + csa_c -> m02039c + m02681c + csasulp_c	Drug metabolism	1000	1000	1
CSASULPteb	efflux of cyclosporine-sulphate into bile	m01371c + m02040c + csasulp_c -> m01285c + m02039c + m02751c + csasulp_s	Drug metabolism	1000	1000	1
CSASULPtev	efflux of cyclosporine-sulphate into hepatic vein	csasulp_c -> csasulp_s	Drug metabolism	1000	1000	1
CSASULPtev_REV	efflux of cyclosporine-sulphate into hepatic vein (reversible)	csasulp_s -> csasulp_c	Drug metabolism	1000	1000	1
CSAitr	CSAitr	csa_c -> csa_r	Drug metabolism	1000	1000	1
CSAitr_REV	CSAitr (reversible)	csa_r -> csa_c	Drug metabolism	1000	1000	1
CSAtd	uptake of cyclosporine by the enterocytes	csa_s -> csa_c	Drug metabolism	1000	1000	1
CSAtd_REV	uptake of cyclosporine by the enterocytes (reversible)	csa_c -> csa_s	Drug metabolism	1000	1000	1
CSAtuNo1	efflux of cyclosporine by P-gp from the enterocytes into lumen (No1)	m01371c + m02040c + csa_c + 9.4162e-05 prot_P08183 -> m01285c + m02039c + m02751c + csa_s	Drug metabolism	92.5865	1000	0.093493
CSNAT2xNo1	Carnitine Dimethyl Nonanoyl Transferase, Revsible, Peroxisomal (No1)	0.00075689 prot_Q9UKG9 + pmet_CSNAT2x -> m01597p + m00950p	Fatty acid oxidation	732.704	1000	0.732971
CSNAT2xNo2	Carnitine Dimethyl Nonanoyl Transferase, Revsible, Peroxisomal (No2)	7.215e-06 prot_P43155 + pmet_CSNAT2x -> m01597p + m00950p	Fatty acid oxidation	1533.47	1000	1.53294
CSNAT2x_REVNo1	Carnitine Dimethyl Nonanoyl Transferase, Revsible, Peroxisomal (reversible) (No1)	0.00075689 prot_Q9UKG9 + pmet_CSNAT2x_REV -> m02348p + dmnoncoa_p	Fatty acid oxidation	732.704	1000	0.732971
CSNAT2x_REVNo2	Carnitine Dimethyl Nonanoyl Transferase, Revsible, Peroxisomal (reversible) (No2)	7.215e-06 prot_P43155 + pmet_CSNAT2x_REV -> m02348p + dmnoncoa_p	Fatty acid oxidation	1533.47	1000	1.53294
CVM1GLUChcNo1	glucuronidation of cerivastatin-M1 (No1)	5.0875e-08 prot_P22309 + pmet_CVM1GLUChc -> m02039r + m03106r + cvm1gluc_r	Drug metabolism	1000	1000	1
CVM1GLUChcNo2	glucuronidation of cerivastatin-M1 (No2)	5.0875e-08 prot_P35503 + pmet_CVM1GLUChc -> m02039r + m03106r + cvm1gluc_r	Drug metabolism	1000	1000	1
CVM23GLUChcNo1	glucuronidation of cerivastatin-M23 (No1)	5.0875e-08 prot_P22309 + pmet_CVM23GLUChc -> m02039r + m03106r + cvm23gluc_r	Drug metabolism	1000	1000	1
CVM23GLUChcNo2	glucuronidation of cerivastatin-M23 (No2)	5.0875e-08 prot_P35503 + pmet_CVM23GLUChc -> m02039r + m03106r + cvm23gluc_r	Drug metabolism	1000	1000	1
CYOOm3iNo1	CYOOm3i (No1)	4 m01826m + 7.92 m02039m + m02630m + 9.2593e-05 prot_P00395 + 9.2593e-05 prot_P00403 + 9.2593e-05 prot_P00414 + 9.2593e-05 prot_P09669 + 9.2593e-05 prot_P10176 + 9.2593e-05 prot_P10606 + 9.2593e-05 prot_P12074 + 9.2593e-05 prot_P13073 + 9.2593e-05 prot_P14854 + 9.2593e-05 prot_P15954 + 9.2593e-05 prot_P20674 + 9.2593e-05 prot_P24310 + 9.2593e-05 prot_P24311 + 9.2593e-05 prot_Q02221 + 9.2593e-05 p…	Oxidative phosphorylation	619.637	1000	0.620017
CYSACMPAChc	acetylation of cysteine-conjugate-acetaminophen in hepatocytes	m01261c + cysacmp_c -> m01597c + m02039c + meracmp_c	Drug metabolism	1000	1000	1
CYSACMPitr	CYSACMPitr	cysacmp_r -> cysacmp_c	Drug metabolism	1000	1000	1
CYSACMPitr_REV	CYSACMPitr (reversible)	cysacmp_c -> cysacmp_r	Drug metabolism	1000	1000	1
CYSAMOe	Cysteamine:Oxygen Oxidoreductase, Extracellular	m02630s + m01627s -> m02039s + m02157s	Transport reactions	1000	1000	1
CYSAMPtev	efflux of cysteine-conjugate-acetaminophen into hepatic vein	m01371c + m02040c + cysacmp_c -> m01285c + m02039c + m02751c + cysacmp_s	Drug metabolism	1000	1000	1
CYSASNMETr	Metabolism (Formation/Degradation) of CysAsnMet	2 m02040c + cysasnmet_c -> m01369c + m01628c + m02471c	Peptide metabolism	1000	1000	1
CYSASNMETr_REV	Metabolism (Formation/Degradation) of CysAsnMet (reversible)	m01369c + m01628c + m02471c -> 2 m02040c + cysasnmet_c	Peptide metabolism	1000	1000	1
CYSASNMETt	Transport of CysAsnMet, Extracellular	m02039s + cysasnmet_s -> m02039c + cysasnmet_c	Transport reactions	1191.21	1000	1.19102
CYSASNMETt_REV	Transport of CysAsnMet, Extracellular (reversible)	m02039c + cysasnmet_c -> m02039s + cysasnmet_s	Transport reactions	1191.21	1000	1.19102
CYSASPPHEr	Metabolism (Formation/Degradation) of CysAspPhe	2 m02040c + cysaspphe_c -> m01370c + m01628c + m02724c	Peptide metabolism	1000	1000	1
CYSASPPHEr_REV	Metabolism (Formation/Degradation) of CysAspPhe (reversible)	m01370c + m01628c + m02724c -> 2 m02040c + cysaspphe_c	Peptide metabolism	1000	1000	1
CYSASPPHEt	Transport of CysAspPhe, Extracellular	m02039s + cysaspphe_s -> m02039c + cysaspphe_c	Transport reactions	1191.21	1000	1.19102
CYSASPPHEt_REV	Transport of CysAspPhe, Extracellular (reversible)	m02039c + cysaspphe_c -> m02039s + cysaspphe_s	Transport reactions	1191.21	1000	1.19102
CYSB0AT3tc	Cysteine Transport by B0At3	m01442s + m01628s + m02519s -> m01442c + m01628c + m02519c	Transport reactions	1000	1000	1
CYSCYSr	Metabolism (Formation/Degradation) of CysCys	m02040c + cyscys_c -> 2 m01628c	Peptide metabolism	1000	1000	1
CYSCYSr_REV	Metabolism (Formation/Degradation) of CysCys (reversible)	2 m01628c -> m02040c + cyscys_c	Peptide metabolism	1000	1000	1
CYSCYSt	Transport of CysCys, Extracellular	m02039s + cyscys_s -> m02039c + cyscys_c	Transport reactions	1191.21	1000	1.19102
CYSCYSt_REV	Transport of CysCys, Extracellular (reversible)	m02039c + cyscys_c -> m02039s + cyscys_s	Transport reactions	1191.21	1000	1.19102
CYSGLNMETr	Metabolism (Formation/Degradation) of CysGlnMet	2 m02040c + cysglnmet_c -> m01628c + m01975c + m02471c	Peptide metabolism	1000	1000	1
CYSGLNMETr_REV	Metabolism (Formation/Degradation) of CysGlnMet (reversible)	m01628c + m01975c + m02471c -> 2 m02040c + cysglnmet_c	Peptide metabolism	1000	1000	1
CYSGLNMETt	Transport of CysGlnMet, Extracellular	m02039s + cysglnmet_s -> m02039c + cysglnmet_c	Transport reactions	1191.21	1000	1.19102
CYSGLNMETt_REV	Transport of CysGlnMet, Extracellular (reversible)	m02039c + cysglnmet_c -> m02039s + cysglnmet_s	Transport reactions	1191.21	1000	1.19102
CYSGLUHISr	Metabolism (Formation/Degradation) of CysGluHis	2 m02040c + cysgluhis_c -> m01628c + m01974c + m02125c	Peptide metabolism	1000	1000	1
CYSGLUHISr_REV	Metabolism (Formation/Degradation) of CysGluHis (reversible)	m01628c + m01974c + m02125c -> 2 m02040c + cysgluhis_c	Peptide metabolism	1000	1000	1
CYSGLUHISt	Transport of CysGluHis, Extracellular	m02039s + cysgluhis_s -> m02039c + cysgluhis_c	Transport reactions	1191.21	1000	1.19102
CYSGLUHISt_REV	Transport of CysGluHis, Extracellular (reversible)	m02039c + cysgluhis_c -> m02039s + cysgluhis_s	Transport reactions	1191.21	1000	1.19102
CYSGLUTRPr	Metabolism (Formation/Degradation) of CysGluTrp	2 m02040c + cysglutrp_c -> m01628c + m01974c + m03089c	Peptide metabolism	1000	1000	1
CYSGLUTRPr_REV	Metabolism (Formation/Degradation) of CysGluTrp (reversible)	m01628c + m01974c + m03089c -> 2 m02040c + cysglutrp_c	Peptide metabolism	1000	1000	1
CYSGLUTRPt	Transport of CysGluTrp, Extracellular	m02039s + cysglutrp_s -> m02039c + cysglutrp_c	Transport reactions	1191.21	1000	1.19102
CYSGLUTRPt_REV	Transport of CysGluTrp, Extracellular (reversible)	m02039c + cysglutrp_c -> m02039s + cysglutrp_s	Transport reactions	1191.21	1000	1.19102
CYSGLYPTASEe_1	Cysteinylglycine Dipeptidase	m02040s + 5cysgly34dhphe_s -> m01986s + m01134s	Tyrosine metabolism	1000	1000	1
CYSLEUTHRr	Metabolism (Formation/Degradation) of CysLeuThr	2 m02040c + cysleuthr_c -> m01628c + m02360c + m02993c	Peptide metabolism	1000	1000	1
CYSLEUTHRr_REV	Metabolism (Formation/Degradation) of CysLeuThr (reversible)	m01628c + m02360c + m02993c -> 2 m02040c + cysleuthr_c	Peptide metabolism	1000	1000	1
CYSLEUTHRt	Transport of CysLeuThr, Extracellular	m02039s + cysleuthr_s -> m02039c + cysleuthr_c	Transport reactions	1191.21	1000	1.19102
CYSLEUTHRt_REV	Transport of CysLeuThr, Extracellular (reversible)	m02039c + cysleuthr_c -> m02039s + cysleuthr_s	Transport reactions	1191.21	1000	1.19102
[truncated: 44,309 more rows]

## Sheet: reactions_sorted_DMD
Reaction ID	Reaction name	Formula	Pathway	FC
NCNt	Na+/Ca2+-NH4+ Antiport	m01413s + 4 m02519c + m02579s -> m01413c + 4 m02519s + m02579c	Transport reactions	1955.05
NCNt_REV	Na+/Ca2+-NH4+ Antiport (reversible)	m01413c + 4 m02519s + m02579c -> m01413s + 4 m02519c + m02579s	Transport reactions	1955.05
H2OGLYAQPt	Water And Glycerol Transport by Aqp	m01983s + m02040s -> m01983c + m02040c	Transport reactions	1227.9
H2OGLYAQPt_REV	Water And Glycerol Transport by Aqp (reversible)	m01983c + m02040c -> m01983s + m02040s	Transport reactions	1227.9
HMR_0444		m01983c -> m01983s	Transport reactions	1227.9
HMR_0444_REV	(reversible)	m01983s -> m01983c	Transport reactions	1227.9
HMR_4885		m02040c -> m02040s	Transport reactions	1227.9
HMR_4885_REV	(reversible)	m02040s -> m02040c	Transport reactions	1227.9
HMR_4365No1	(No1)	pmet_HMR_4365 + 6.3131e-05 prot_P15259 -> m00913c	Glycolysis / Gluconeogenesis	1160.95
HMR_4365_REVNo1	(reversible) (No1)	6.3131e-05 prot_P15259 + pmet_HMR_4365_REV -> m00674c	Glycolysis / Gluconeogenesis	1160.95
arm_HMR_4365	(arm)	m00674c -> pmet_HMR_4365	Glycolysis / Gluconeogenesis	1160.95
arm_HMR_4365_REV	(reversible) (arm)	m00913c -> pmet_HMR_4365_REV	Glycolysis / Gluconeogenesis	1160.95
HMR_1098No15	(No15)	1.1067e-06 prot_P80365 + pmet_HMR_1098 -> m00394c + m02039c + m02555c	Leukotriene metabolism	917.764
HMR_1098_REVNo15	(reversible) (No15)	1.5518e-06 prot_P80365 + pmet_HMR_1098_REV -> m00339c + m02554c	Leukotriene metabolism	917.764
HMR_1813No15	(No15)	1.5518e-06 prot_P80365 + pmet_HMR_1813 -> m01087r + m02554r	Bile acid biosynthesis	917.764
HMR_1813_REVNo15	(reversible) (No15)	1.1067e-06 prot_P80365 + pmet_HMR_1813_REV -> m00747r + m02039r + m02555r	Bile acid biosynthesis	917.764
HMR_6670No15	(No15)	1.5518e-06 prot_P80365 + pmet_HMR_6670 -> m01229c + m02554c	Retinol metabolism	917.764
HMR_6670_REVNo15	(reversible) (No15)	1.1067e-06 prot_P80365 + pmet_HMR_6670_REV -> m01029c + m02039c + m02555c	Retinol metabolism	917.764
HMR_6925No15	(No15)	5.4466e-07 prot_P80365 + pmet_HMR_6925 -> m01325c + m02552c	Valine, leucine, and isoleucine metabolism	917.764
HMR_6925_REVNo15	(reversible) (No15)	1.5288e-07 prot_P80365 + pmet_HMR_6925_REV -> m01013c + m02039c + m02553c	Valine, leucine, and isoleucine metabolism	917.764
HMR_7943No1	(No1)	m01616r + m02039r + m02553r + 5.4466e-07 prot_P80365 -> m01615r + m02552r	Steroid metabolism	917.764
HMR_7943_REVNo1	(reversible) (No1)	m01615r + m02552r + 1.5288e-07 prot_P80365 -> m01616r + m02039r + m02553r	Steroid metabolism	917.764
HMR_9804No15	(No15)	pmet_HMR_9804 + 1.1067e-06 prot_P80365 -> m02039m + m02555m + m03168m	Propanoate metabolism	917.764
HMR_9804_REVNo15	(reversible) (No15)	1.5518e-06 prot_P80365 + pmet_HMR_9804_REV -> m00799m + m02554m	Propanoate metabolism	917.764
arm_HMR_1098	(arm)	m00339c + m02554c -> pmet_HMR_1098	Leukotriene metabolism	917.764
arm_HMR_1098_REV	(reversible) (arm)	m00394c + m02039c + m02555c -> pmet_HMR_1098_REV	Leukotriene metabolism	917.764
arm_HMR_1813	(arm)	m00747r + m02039r + m02555r -> pmet_HMR_1813	Bile acid biosynthesis	917.764
arm_HMR_1813_REV	(reversible) (arm)	m01087r + m02554r -> pmet_HMR_1813_REV	Bile acid biosynthesis	917.764
arm_HMR_6670	(arm)	m01029c + m02039c + m02555c -> pmet_HMR_6670	Retinol metabolism	917.764
arm_HMR_6670_REV	(reversible) (arm)	m01229c + m02554c -> pmet_HMR_6670_REV	Retinol metabolism	917.764
arm_HMR_6925	(arm)	m01013c + m02039c + m02553c -> pmet_HMR_6925	Valine, leucine, and isoleucine metabolism	917.764
arm_HMR_6925_REV	(reversible) (arm)	m01325c + m02552c -> pmet_HMR_6925_REV	Valine, leucine, and isoleucine metabolism	917.764
arm_HMR_9804	(arm)	m00799m + m02554m -> pmet_HMR_9804	Propanoate metabolism	917.764
arm_HMR_9804_REV	(reversible) (arm)	m02039m + m02555m + m03168m -> pmet_HMR_9804_REV	Propanoate metabolism	917.764
HMR_1098No25	(No25)	4.7893e-05 prot_C9JRZ8 + pmet_HMR_1098 -> m00394c + m02039c + m02555c	Leukotriene metabolism	867.081
HMR_1098_REVNo25	(reversible) (No25)	4.7893e-05 prot_C9JRZ8 + pmet_HMR_1098_REV -> m00339c + m02554c	Leukotriene metabolism	867.081
HMR_1813No25	(No25)	4.7893e-05 prot_C9JRZ8 + pmet_HMR_1813 -> m01087r + m02554r	Bile acid biosynthesis	867.081
HMR_1813_REVNo25	(reversible) (No25)	4.7893e-05 prot_C9JRZ8 + pmet_HMR_1813_REV -> m00747r + m02039r + m02555r	Bile acid biosynthesis	867.081
HMR_6670No25	(No25)	4.7893e-05 prot_C9JRZ8 + pmet_HMR_6670 -> m01229c + m02554c	Retinol metabolism	867.081
HMR_6670_REVNo25	(reversible) (No25)	4.7893e-05 prot_C9JRZ8 + pmet_HMR_6670_REV -> m01029c + m02039c + m02555c	Retinol metabolism	867.081
HMR_6925No25	(No25)	4.7893e-05 prot_C9JRZ8 + pmet_HMR_6925 -> m01325c + m02552c	Valine, leucine, and isoleucine metabolism	867.081
HMR_6925_REVNo25	(reversible) (No25)	4.7893e-05 prot_C9JRZ8 + pmet_HMR_6925_REV -> m01013c + m02039c + m02553c	Valine, leucine, and isoleucine metabolism	867.081
HMR_9804No25	(No25)	pmet_HMR_9804 + 4.7893e-05 prot_C9JRZ8 -> m02039m + m02555m + m03168m	Propanoate metabolism	867.081
HMR_9804_REVNo25	(reversible) (No25)	4.7893e-05 prot_C9JRZ8 + pmet_HMR_9804_REV -> m00799m + m02554m	Propanoate metabolism	867.081
HMR_6826No1	(No1)	pmet_HMR_6826 + 0.0013355 prot_P55073 -> m02555c + m03052c	Phenylalanine, tyrosine and tryptophan biosynthesis	825.676
HMR_6826_REVNo1	(reversible) (No1)	0.0013355 prot_P55073 + pmet_HMR_6826_REV -> m00720c + m02174c + m02554c	Phenylalanine, tyrosine and tryptophan biosynthesis	825.676
HMR_6827No1	(No1)	0.0013355 prot_P55073 + pmet_HMR_6827 -> m02555r + m03052r	Phenylalanine, tyrosine and tryptophan biosynthesis	825.676
HMR_6827_REVNo1	(reversible) (No1)	0.0013355 prot_P55073 + pmet_HMR_6827_REV -> m00720r + m02174r + m02554r	Phenylalanine, tyrosine and tryptophan biosynthesis	825.676
arm_HMR_6826	(arm)	m00720c + m02174c + m02554c -> pmet_HMR_6826	Phenylalanine, tyrosine and tryptophan biosynthesis	825.676
arm_HMR_6826_REV	(reversible) (arm)	m02555c + m03052c -> pmet_HMR_6826_REV	Phenylalanine, tyrosine and tryptophan biosynthesis	825.676
arm_HMR_6827	(arm)	m00720r + m02174r + m02554r -> pmet_HMR_6827	Phenylalanine, tyrosine and tryptophan biosynthesis	825.676
arm_HMR_6827_REV	(reversible) (arm)	m02555r + m03052r -> pmet_HMR_6827_REV	Phenylalanine, tyrosine and tryptophan biosynthesis	825.676
HMR_0991No22	(No22)	2.1701e-06 prot_Q8N118 + pmet_HMR_0991 -> m00390c	Arachidonic acid metabolism	825.422
HMR_0991_REVNo22	(reversible) (No22)	2.1701e-06 prot_Q8N118 + pmet_HMR_0991_REV -> m00380c	Arachidonic acid metabolism	825.422
HMR_0992No22	(No22)	2.1701e-06 prot_Q8N118 + pmet_HMR_0992 -> m00390c + m02040c	Arachidonic acid metabolism	825.422
HMR_0992_REVNo22	(reversible) (No22)	2.1701e-06 prot_Q8N118 + pmet_HMR_0992_REV -> m00276c	Arachidonic acid metabolism	825.422
HMR_0993No22	(No22)	2.1701e-06 prot_Q8N118 + pmet_HMR_0993 -> m00380c	Arachidonic acid metabolism	825.422
HMR_0993_REVNo22	(reversible) (No22)	2.1701e-06 prot_Q8N118 + pmet_HMR_0993_REV -> m00296c	Arachidonic acid metabolism	825.422
HMR_0994No22	(No22)	2.1701e-06 prot_Q8N118 + pmet_HMR_0994 -> m00296c + m02040c	Arachidonic acid metabolism	825.422
HMR_0994_REVNo22	(reversible) (No22)	2.1701e-06 prot_Q8N118 + pmet_HMR_0994_REV -> m00280c	Arachidonic acid metabolism	825.422
HMR_1149No21	(No21)	0.00010808 prot_Q8N118 + pmet_HMR_1149 -> m01152c + m02554c	Leukotriene metabolism	825.422
HMR_1149_REVNo21	(reversible) (No21)	2.1701e-06 prot_Q8N118 + pmet_HMR_1149_REV -> m01124c + m02039c + m02555c	Leukotriene metabolism	825.422
HMR_1150No21	(No21)	0.00010808 prot_Q8N118 + pmet_HMR_1150 -> m01152m + m02554m	Leukotriene metabolism	825.422
HMR_1150_REVNo21	(reversible) (No21)	2.1701e-06 prot_Q8N118 + pmet_HMR_1150_REV -> m01124m + m02039m + m02555m	Leukotriene metabolism	825.422
HMR_1151No21	(No21)	0.00010808 prot_Q8N118 + pmet_HMR_1151 -> m01152r + m02554r	Leukotriene metabolism	825.422
HMR_1151_REVNo21	(reversible) (No21)	2.1701e-06 prot_Q8N118 + pmet_HMR_1151_REV -> m01124r + m02039r + m02555r	Leukotriene metabolism	825.422
HMR_1152No21	(No21)	0.00010808 prot_Q8N118 + pmet_HMR_1152 -> m01152p + m02554p	Leukotriene metabolism	825.422
HMR_1152_REVNo21	(reversible) (No21)	2.1701e-06 prot_Q8N118 + pmet_HMR_1152_REV -> m01124p + m02039p + m02555p	Leukotriene metabolism	825.422
HMR_1153No22	(No22)	0.00010808 prot_Q8N118 + pmet_HMR_1153 -> m01153c + m02554c	Leukotriene metabolism	825.422
HMR_1153_REVNo22	(reversible) (No22)	2.1701e-06 prot_Q8N118 + pmet_HMR_1153_REV -> m01152c + m02039c + m02555c	Leukotriene metabolism	825.422
HMR_1154No22	(No22)	0.00010808 prot_Q8N118 + pmet_HMR_1154 -> m01153m + m02554m	Leukotriene metabolism	825.422
HMR_1154_REVNo22	(reversible) (No22)	2.1701e-06 prot_Q8N118 + pmet_HMR_1154_REV -> m01152m + m02039m + m02555m	Leukotriene metabolism	825.422
HMR_1155No22	(No22)	0.00010808 prot_Q8N118 + pmet_HMR_1155 -> m01153r + m02554r	Leukotriene metabolism	825.422
HMR_1155_REVNo22	(reversible) (No22)	2.1701e-06 prot_Q8N118 + pmet_HMR_1155_REV -> m01152r + m02039r + m02555r	Leukotriene metabolism	825.422
HMR_1156No22	(No22)	0.00010808 prot_Q8N118 + pmet_HMR_1156 -> m01153p + m02554p	Leukotriene metabolism	825.422
HMR_1156_REVNo22	(reversible) (No22)	2.1701e-06 prot_Q8N118 + pmet_HMR_1156_REV -> m01152p + m02039p + m02555p	Leukotriene metabolism	825.422
HMR_1193No22	(No22)	0.00010808 prot_Q8N118 + pmet_HMR_1193 -> m01151c + m02554c	Leukotriene metabolism	825.422
HMR_1193_REVNo22	(reversible) (No22)	2.1701e-06 prot_Q8N118 + pmet_HMR_1193_REV -> m01118c + m02039c + m02555c	Leukotriene metabolism	825.422
HMR_1194No22	(No22)	0.00010808 prot_Q8N118 + pmet_HMR_1194 -> m01151m + m02554m	Leukotriene metabolism	825.422
HMR_1194_REVNo22	(reversible) (No22)	2.1701e-06 prot_Q8N118 + pmet_HMR_1194_REV -> m01118m + m02039m + m02555m	Leukotriene metabolism	825.422
HMR_1195No22	(No22)	0.00010808 prot_Q8N118 + pmet_HMR_1195 -> m01151r + m02554r	Leukotriene metabolism	825.422
HMR_1195_REVNo22	(reversible) (No22)	2.1701e-06 prot_Q8N118 + pmet_HMR_1195_REV -> m01118r + m02039r + m02555r	Leukotriene metabolism	825.422
HMR_1196No22	(No22)	0.00010808 prot_Q8N118 + pmet_HMR_1196 -> m01151p + m02554p	Leukotriene metabolism	825.422
HMR_1196_REVNo22	(reversible) (No22)	2.1701e-06 prot_Q8N118 + pmet_HMR_1196_REV -> m01118p + m02039p + m02555p	Leukotriene metabolism	825.422
arm_HMR_0991	(arm)	m00380c -> pmet_HMR_0991	Arachidonic acid metabolism	825.422
arm_HMR_0991_REV	(reversible) (arm)	m00390c -> pmet_HMR_0991_REV	Arachidonic acid metabolism	825.422
arm_HMR_0992	(arm)	m00276c -> pmet_HMR_0992	Arachidonic acid metabolism	825.422
arm_HMR_0992_REV	(reversible) (arm)	m00390c + m02040c -> pmet_HMR_0992_REV	Arachidonic acid metabolism	825.422
arm_HMR_0993	(arm)	m00296c -> pmet_HMR_0993	Arachidonic acid metabolism	825.422
arm_HMR_0993_REV	(reversible) (arm)	m00380c -> pmet_HMR_0993_REV	Arachidonic acid metabolism	825.422
arm_HMR_0994	(arm)	m00280c -> pmet_HMR_0994	Arachidonic acid metabolism	825.422
arm_HMR_0994_REV	(reversible) (arm)	m00296c + m02040c -> pmet_HMR_0994_REV	Arachidonic acid metabolism	825.422
arm_HMR_1149	(arm)	m01124c + m02039c + m02555c -> pmet_HMR_1149	Leukotriene metabolism	825.422
arm_HMR_1149_REV	(reversible) (arm)	m01152c + m02554c -> pmet_HMR_1149_REV	Leukotriene metabolism	825.422
arm_HMR_1150	(arm)	m01124m + m02039m + m02555m -> pmet_HMR_1150	Leukotriene metabolism	825.422
arm_HMR_1150_REV	(reversible) (arm)	m01152m + m02554m -> pmet_HMR_1150_REV	Leukotriene metabolism	825.422
arm_HMR_1151	(arm)	m01124r + m02039r + m02555r -> pmet_HMR_1151	Leukotriene metabolism	825.422
arm_HMR_1151_REV	(reversible) (arm)	m01152r + m02554r -> pmet_HMR_1151_REV	Leukotriene metabolism	825.422
arm_HMR_1152	(arm)	m01124p + m02039p + m02555p -> pmet_HMR_1152	Leukotriene metabolism	825.422
arm_HMR_1152_REV	(reversible) (arm)	m01152p + m02554p -> pmet_HMR_1152_REV	Leukotriene metabolism	825.422
arm_HMR_1153	(arm)	m01152c + m02039c + m02555c -> pmet_HMR_1153	Leukotriene metabolism	825.422
arm_HMR_1153_REV	(reversible) (arm)	m01153c + m02554c -> pmet_HMR_1153_REV	Leukotriene metabolism	825.422
arm_HMR_1154	(arm)	m01152m + m02039m + m02555m -> pmet_HMR_1154	Leukotriene metabolism	825.422
arm_HMR_1154_REV	(reversible) (arm)	m01153m + m02554m -> pmet_HMR_1154_REV	Leukotriene metabolism	825.422
arm_HMR_1155	(arm)	m01152r + m02039r + m02555r -> pmet_HMR_1155	Leukotriene metabolism	825.422
arm_HMR_1155_REV	(reversible) (arm)	m01153r + m02554r -> pmet_HMR_1155_REV	Leukotriene metabolism	825.422
arm_HMR_1156	(arm)	m01152p + m02039p + m02555p -> pmet_HMR_1156	Leukotriene metabolism	825.422
arm_HMR_1156_REV	(reversible) (arm)	m01153p + m02554p -> pmet_HMR_1156_REV	Leukotriene metabolism	825.422
arm_HMR_1193	(arm)	m01118c + m02039c + m02555c -> pmet_HMR_1193	Leukotriene metabolism	825.422
arm_HMR_1193_REV	(reversible) (arm)	m01151c + m02554c -> pmet_HMR_1193_REV	Leukotriene metabolism	825.422
arm_HMR_1194	(arm)	m01118m + m02039m + m02555m -> pmet_HMR_1194	Leukotriene metabolism	825.422
arm_HMR_1194_REV	(reversible) (arm)	m01151m + m02554m -> pmet_HMR_1194_REV	Leukotriene metabolism	825.422
arm_HMR_1195	(arm)	m01118r + m02039r + m02555r -> pmet_HMR_1195	Leukotriene metabolism	825.422
arm_HMR_1195_REV	(reversible) (arm)	m01151r + m02554r -> pmet_HMR_1195_REV	Leukotriene metabolism	825.422
arm_HMR_1196	(arm)	m01118p + m02039p + m02555p -> pmet_HMR_1196	Leukotriene metabolism	825.422
arm_HMR_1196_REV	(reversible) (arm)	m01151p + m02554p -> pmet_HMR_1196_REV	Leukotriene metabolism	825.422
HMR_5406No9	(No9)	6.6138e-11 prot_P22748 + pmet_HMR_5406 -> m01421c	Miscellaneous	725.697
HMR_5406_REVNo9	(reversible) (No9)	6.6138e-11 prot_P22748 + pmet_HMR_5406_REV -> m01596c + m02040c	Miscellaneous	725.697
HMR_5407No9	(No9)	pmet_HMR_5407 + 6.6138e-11 prot_P22748 -> m01421s	Miscellaneous	725.697
HMR_5407_REVNo9	(reversible) (No9)	6.6138e-11 prot_P22748 + pmet_HMR_5407_REV -> m01596s + m02040s	Miscellaneous	725.697
arm_HMR_5406	(arm)	m01596c + m02040c -> pmet_HMR_5406	Miscellaneous	725.697
arm_HMR_5406_REV	(reversible) (arm)	m01421c -> pmet_HMR_5406_REV	Miscellaneous	725.697
arm_HMR_5407	(arm)	m01596s + m02040s -> pmet_HMR_5407	Miscellaneous	725.697
arm_HMR_5407_REV	(reversible) (arm)	m01421s -> pmet_HMR_5407_REV	Miscellaneous	725.697
prot_P55073_exchange	prot_P55073_exchange	-> prot_P55073	Protein translation and secretion	696.336
HMR_4549No16	(No16)	0.00053419 prot_Q96MM7 + pmet_HMR_4549 -> m01161c + m02949c	Serotonin and melatonin biosynthesis	593.554
HMR_4549_REVNo16	(reversible) (No16)	0.00053419 prot_Q96MM7 + pmet_HMR_4549_REV -> m01162c + m02039c	Serotonin and melatonin biosynthesis	593.554
arm_HMR_4549	(arm)	m01162c + m02039c -> pmet_HMR_4549	Serotonin and melatonin biosynthesis	593.554
arm_HMR_4549_REV	(reversible) (arm)	m01161c + m02949c -> pmet_HMR_4549_REV	Serotonin and melatonin biosynthesis	593.554
HMR_4949		m03121c -> m03121s	Transport reactions	371.382
HMR_4949_REV	(reversible)	m03121s -> m03121c	Transport reactions	371.382
HMR_4951		m03121c -> m03121m	Transport reactions	371.382
HMR_4951_REV	(reversible)	m03121m -> m03121c	Transport reactions	371.382
prot_Q8N118_exchange	prot_Q8N118_exchange	-> prot_Q8N118	Protein translation and secretion	318.351
HMR_2461No8	(No8)	5.0875e-08 prot_P16662 + pmet_HMR_2461 -> m01240c + m02039c + m03106c	Linoleate metabolism	303.142
HMR_2461_REVNo8	(reversible) (No8)	5.0875e-08 prot_P16662 + pmet_HMR_2461_REV -> m01220c + m03109c	Linoleate metabolism	303.142
HMR_2463No8	(No8)	5.0875e-08 prot_P16662 + pmet_HMR_2463 -> m01220c + m03109c	Linoleate metabolism	303.142
HMR_2463_REVNo8	(reversible) (No8)	5.0875e-08 prot_P16662 + pmet_HMR_2463_REV -> m00274c + m02039c + m03106c	Linoleate metabolism	303.142
HMR_2467No8	(No8)	5.0875e-08 prot_P16662 + pmet_HMR_2467 -> m00323c + m02039c + m03106c	Linoleate metabolism	303.142
HMR_2467_REVNo8	(reversible) (No8)	5.0875e-08 prot_P16662 + pmet_HMR_2467_REV -> m00314c + m03109c	Linoleate metabolism	303.142
HMR_2469No8	(No8)	5.0875e-08 prot_P16662 + pmet_HMR_2469 -> m00327c + m02039c + m03106c	Linoleate metabolism	303.142
HMR_2469_REVNo8	(reversible) (No8)	5.0875e-08 prot_P16662 + pmet_HMR_2469_REV -> m00314c + m03109c	Linoleate metabolism	303.142
HMR_6668No8	(No8)	5.0875e-08 prot_P16662 + pmet_HMR_6668 -> m01030c + m03106c	Retinol metabolism	303.142
HMR_6668_REVNo8	(reversible) (No8)	5.0875e-08 prot_P16662 + pmet_HMR_6668_REV -> m01029c + m03109c	Retinol metabolism	303.142
HMR_6798No8	(No8)	pmet_HMR_6798 + 5.0875e-08 prot_P16662 -> m03052c + m03109c	Phenylalanine, tyrosine and tryptophan biosynthesis	303.142
HMR_6798_REVNo8	(reversible) (No8)	5.0875e-08 prot_P16662 + pmet_HMR_6798_REV -> m00733c + m02039c + m03106c	Phenylalanine, tyrosine and tryptophan biosynthesis	303.142
HMR_6800No8	(No8)	5.0875e-08 prot_P16662 + pmet_HMR_6800 -> m02998c + m03109c	Phenylalanine, tyrosine and tryptophan biosynthesis	303.142
HMR_6800_REVNo8	(reversible) (No8)	5.0875e-08 prot_P16662 + pmet_HMR_6800_REV -> m00732c + m02039c + m03106c	Phenylalanine, tyrosine and tryptophan biosynthesis	303.142
HMR_6836No8	(No8)	5.0875e-08 prot_P16662 + pmet_HMR_6836 -> m02839c + m03109c	Phenylalanine, tyrosine and tryptophan biosynthesis	303.142
HMR_6836_REVNo8	(reversible) (No8)	5.0875e-08 prot_P16662 + pmet_HMR_6836_REV -> m00719c + m02039c + m03106c	Phenylalanine, tyrosine and tryptophan biosynthesis	303.142
HMR_6842No8	(No8)	5.0875e-08 prot_P16662 + pmet_HMR_6842 -> m00736c + m03109c	Phenylalanine, tyrosine and tryptophan biosynthesis	303.142
HMR_6842_REVNo8	(reversible) (No8)	5.0875e-08 prot_P16662 + pmet_HMR_6842_REV -> m00738c + m02039c + m03106c	Phenylalanine, tyrosine and tryptophan biosynthesis	303.142
arm_HMR_2461	(arm)	m01220c + m03109c -> pmet_HMR_2461	Linoleate metabolism	303.142
arm_HMR_2461_REV	(reversible) (arm)	m01240c + m02039c + m03106c -> pmet_HMR_2461_REV	Linoleate metabolism	303.142
arm_HMR_2463	(arm)	m00274c + m02039c + m03106c -> pmet_HMR_2463	Linoleate metabolism	303.142
arm_HMR_2463_REV	(reversible) (arm)	m01220c + m03109c -> pmet_HMR_2463_REV	Linoleate metabolism	303.142
arm_HMR_2467	(arm)	m00314c + m03109c -> pmet_HMR_2467	Linoleate metabolism	303.142
arm_HMR_2467_REV	(reversible) (arm)	m00323c + m02039c + m03106c -> pmet_HMR_2467_REV	Linoleate metabolism	303.142
arm_HMR_2469	(arm)	m00314c + m03109c -> pmet_HMR_2469	Linoleate metabolism	303.142
arm_HMR_2469_REV	(reversible) (arm)	m00327c + m02039c + m03106c -> pmet_HMR_2469_REV	Linoleate metabolism	303.142
arm_HMR_6668	(arm)	m01029c + m03109c -> pmet_HMR_6668	Retinol metabolism	303.142
arm_HMR_6668_REV	(reversible) (arm)	m01030c + m03106c -> pmet_HMR_6668_REV	Retinol metabolism	303.142
arm_HMR_6798	(arm)	m00733c + m02039c + m03106c -> pmet_HMR_6798	Phenylalanine, tyrosine and tryptophan biosynthesis	303.142
arm_HMR_6798_REV	(reversible) (arm)	m03052c + m03109c -> pmet_HMR_6798_REV	Phenylalanine, tyrosine and tryptophan biosynthesis	303.142
arm_HMR_6800	(arm)	m00732c + m02039c + m03106c -> pmet_HMR_6800	Phenylalanine, tyrosine and tryptophan biosynthesis	303.142
arm_HMR_6800_REV	(reversible) (arm)	m02998c + m03109c -> pmet_HMR_6800_REV	Phenylalanine, tyrosine and tryptophan biosynthesis	303.142
arm_HMR_6836	(arm)	m00719c + m02039c + m03106c -> pmet_HMR_6836	Phenylalanine, tyrosine and tryptophan biosynthesis	303.142
arm_HMR_6836_REV	(reversible) (arm)	m02839c + m03109c -> pmet_HMR_6836_REV	Phenylalanine, tyrosine and tryptophan biosynthesis	303.142
arm_HMR_6842	(arm)	m00738c + m02039c + m03106c -> pmet_HMR_6842	Phenylalanine, tyrosine and tryptophan biosynthesis	303.142
arm_HMR_6842_REV	(reversible) (arm)	m00736c + m03109c -> pmet_HMR_6842_REV	Phenylalanine, tyrosine and tryptophan biosynthesis	303.142
prot_C9JRZ8_exchange	prot_C9JRZ8_exchange	-> prot_C9JRZ8	Protein translation and secretion	281.748
ALAALACNcNo2	Hydrolysis of Alanylalanine (No2)	2.0129e-06 prot_Q96KN2 + pmet_ALAALACNc -> 2 m01307c	Transport reactions	261.271
ALAALACNc_REVNo2	Hydrolysis of Alanylalanine (reversible) (No2)	2.0129e-06 prot_Q96KN2 + pmet_ALAALACNc_REV -> m02040c + alaala_c	Transport reactions	261.271
GLYGLYCNcNo2	Hydrolysis of Glycylycine for Uptake (No2)	2.0129e-06 prot_Q96KN2 + pmet_GLYGLYCNc -> 2 m01986c	Transport reactions	261.271
GLYGLYCNc_REVNo2	Hydrolysis of Glycylycine for Uptake (reversible) (No2)	2.0129e-06 prot_Q96KN2 + pmet_GLYGLYCNc_REV -> m02040c + glygly_c	Transport reactions	261.271
arm_ALAALACNc	Hydrolysis of Alanylalanine (arm)	m02040c + alaala_c -> pmet_ALAALACNc	Transport reactions	261.271
arm_ALAALACNc_REV	Hydrolysis of Alanylalanine (reversible) (arm)	2 m01307c -> pmet_ALAALACNc_REV	Transport reactions	261.271
arm_GLYGLYCNc	Hydrolysis of Glycylycine for Uptake (arm)	m02040c + glygly_c -> pmet_GLYGLYCNc	Transport reactions	261.271
arm_GLYGLYCNc_REV	Hydrolysis of Glycylycine for Uptake (reversible) (arm)	2 m01986c -> pmet_GLYGLYCNc_REV	Transport reactions	261.271
prot_Q96MM7_exchange	prot_Q96MM7_exchange	-> prot_Q96MM7	Protein translation and secretion	241.747
HMR_0156No4	(No4)	pmet_HMR_0156 + 4.6296e-05 prot_Q6NUN0 -> m01371c + m01410c + m01597c	Fatty acid activation (cytosolic)	214.769
HMR_0156_REVNo4	(reversible) (No4)	4.6296e-05 prot_Q6NUN0 + pmet_HMR_0156_REV -> m01334c + m01412c + m02759c	Fatty acid activation (cytosolic)	214.769
HMR_0165No4	(No4)	4.6296e-05 prot_Q6NUN0 + pmet_HMR_0165 -> m01371c + m01597c + m03134c	Fatty acid activation (cytosolic)	214.769
HMR_0165_REVNo4	(reversible) (No4)	4.6296e-05 prot_Q6NUN0 + pmet_HMR_0165_REV -> m01334c + m02694c + m02759c	Fatty acid activation (cytosolic)	214.769
HMR_0168No4	(No4)	4.6296e-05 prot_Q6NUN0 + pmet_HMR_0168 -> m01371c + m01597c + m02120c	Fatty acid activation (cytosolic)	214.769
HMR_0168_REVNo4	(reversible) (No4)	4.6296e-05 prot_Q6NUN0 + pmet_HMR_0168_REV -> m01334c + m02122c + m02759c	Fatty acid activation (cytosolic)	214.769
HMR_0171No4	(No4)	4.6296e-05 prot_Q6NUN0 + pmet_HMR_0171 -> m01371c + m01597c + m02108c	Fatty acid activation (cytosolic)	214.769
HMR_0171_REVNo4	(reversible) (No4)	4.6296e-05 prot_Q6NUN0 + pmet_HMR_0171_REV -> m01334c + m02107c + m02759c	Fatty acid activation (cytosolic)	214.769
HMR_0174No4	(No4)	4.6296e-05 prot_Q6NUN0 + pmet_HMR_0174 -> m01371c + m01597c + m02642c	Fatty acid activation (cytosolic)	214.769
HMR_0174_REVNo4	(reversible) (No4)	4.6296e-05 prot_Q6NUN0 + pmet_HMR_0174_REV -> m01334c + m02644c + m02759c	Fatty acid activation (cytosolic)	214.769
HMR_0177No4	(No4)	4.6296e-05 prot_Q6NUN0 + pmet_HMR_0177 -> m01371c + m01597c + m02614c	Fatty acid activation (cytosolic)	214.769
HMR_0177_REVNo4	(reversible) (No4)	4.6296e-05 prot_Q6NUN0 + pmet_HMR_0177_REV -> m01334c + m02616c + m02759c	Fatty acid activation (cytosolic)	214.769
HMR_0180No4	(No4)	4.6296e-05 prot_Q6NUN0 + pmet_HMR_0180 -> m01371c + m01597c + m01648c	Fatty acid activation (cytosolic)	214.769
HMR_0180_REVNo4	(reversible) (No4)	4.6296e-05 prot_Q6NUN0 + pmet_HMR_0180_REV -> m01334c + m01650c + m02759c	Fatty acid activation (cytosolic)	214.769
HMR_0184No4	(No4)	4.6296e-05 prot_Q6NUN0 + pmet_HMR_0184 -> m01371c + m01597c + m03117c	Fatty acid activation (cytosolic)	214.769
HMR_0184_REVNo4	(reversible) (No4)	4.6296e-05 prot_Q6NUN0 + pmet_HMR_0184_REV -> m01334c + m02759c + m03116c	Fatty acid activation (cytosolic)	214.769
arm_HMR_0156	(arm)	m01334c + m01412c + m02759c -> pmet_HMR_0156	Fatty acid activation (cytosolic)	214.769
arm_HMR_0156_REV	(reversible) (arm)	m01371c + m01410c + m01597c -> pmet_HMR_0156_REV	Fatty acid activation (cytosolic)	214.769
arm_HMR_0165	(arm)	m01334c + m02694c + m02759c -> pmet_HMR_0165	Fatty acid activation (cytosolic)	214.769
arm_HMR_0165_REV	(reversible) (arm)	m01371c + m01597c + m03134c -> pmet_HMR_0165_REV	Fatty acid activation (cytosolic)	214.769
arm_HMR_0168	(arm)	m01334c + m02122c + m02759c -> pmet_HMR_0168	Fatty acid activation (cytosolic)	214.769
arm_HMR_0168_REV	(reversible) (arm)	m01371c + m01597c + m02120c -> pmet_HMR_0168_REV	Fatty acid activation (cytosolic)	214.769
arm_HMR_0171	(arm)	m01334c + m02107c + m02759c -> pmet_HMR_0171	Fatty acid activation (cytosolic)	214.769
arm_HMR_0171_REV	(reversible) (arm)	m01371c + m01597c + m02108c -> pmet_HMR_0171_REV	Fatty acid activation (cytosolic)	214.769
arm_HMR_0174	(arm)	m01334c + m02644c + m02759c -> pmet_HMR_0174	Fatty acid activation (cytosolic)	214.769
arm_HMR_0174_REV	(reversible) (arm)	m01371c + m01597c + m02642c -> pmet_HMR_0174_REV	Fatty acid activation (cytosolic)	214.769
arm_HMR_0177	(arm)	m01334c + m02616c + m02759c -> pmet_HMR_0177	Fatty acid activation (cytosolic)	214.769
arm_HMR_0177_REV	(reversible) (arm)	m01371c + m01597c + m02614c -> pmet_HMR_0177_REV	Fatty acid activation (cytosolic)	214.769
arm_HMR_0180	(arm)	m01334c + m01650c + m02759c -> pmet_HMR_0180	Fatty acid activation (cytosolic)	214.769
arm_HMR_0180_REV	(reversible) (arm)	m01371c + m01597c + m01648c -> pmet_HMR_0180_REV	Fatty acid activation (cytosolic)	214.769
arm_HMR_0184	(arm)	m01334c + m02759c + m03116c -> pmet_HMR_0184	Fatty acid activation (cytosolic)	214.769
arm_HMR_0184_REV	(reversible) (arm)	m01371c + m01597c + m03117c -> pmet_HMR_0184_REV	Fatty acid activation (cytosolic)	214.769
HMR_8559No1	(No1)	pmet_HMR_8559 + 0.00010522 prot_P41222 -> m02794r	Eicosanoid metabolism	185.021
HMR_8559_REVNo1	(reversible) (No1)	0.00010522 prot_P41222 + pmet_HMR_8559_REV -> m02783r	Eicosanoid metabolism	185.021
arm_HMR_8559	(arm)	m02783r -> pmet_HMR_8559	Eicosanoid metabolism	185.021
arm_HMR_8559_REV	(reversible) (arm)	m02794r -> pmet_HMR_8559_REV	Eicosanoid metabolism	185.021
HMR_7942No1	(No1)	m01616r + m02039r + m02555r + 0.00069444 prot_P28845 -> m01615r + m02554r	Steroid metabolism	146.493
HMR_7942_REVNo1	(reversible) (No1)	m01615r + m02554r + 0.001462 prot_P28845 -> m01616r + m02039r + m02555r	Steroid metabolism	146.493
HMR_6652No1	(No1)	8.4175e-05 prot_O94788 + pmet_HMR_6652 -> m01231r + 2 m02039r + m02553r	Retinol metabolism	131.803
HMR_6652_REVNo1	(reversible) (No1)	0.0039683 prot_O94788 + pmet_HMR_6652_REV -> m01230r + m02040r + m02552r	Retinol metabolism	131.803
HMR_6674No1	(No1)	8.4175e-05 prot_O94788 + pmet_HMR_6674 -> 2 m02039r + m02553r + m02833r	Retinol metabolism	131.803
HMR_6674_REVNo1	(reversible) (No1)	0.0039683 prot_O94788 + pmet_HMR_6674_REV -> m00349r + m02040r + m02552r	Retinol metabolism	131.803
HMR_6675No1	(No1)	8.4175e-05 prot_O94788 + pmet_HMR_6675 -> m00350c + 2 m02039c + m02553c	Retinol metabolism	131.803
HMR_6675_REVNo1	(reversible) (No1)	0.0039683 prot_O94788 + pmet_HMR_6675_REV -> m00349c + m02040c + m02552c	Retinol metabolism	131.803
HMR_6676No1	(No1)	8.4175e-05 prot_O94788 + pmet_HMR_6676 -> m00350r + 2 m02039r + m02553r	Retinol metabolism	131.803
HMR_6676_REVNo1	(reversible) (No1)	0.0039683 prot_O94788 + pmet_HMR_6676_REV -> m00349r + m02040r + m02552r	Retinol metabolism	131.803
arm_HMR_6652	(arm)	m01230r + m02040r + m02552r -> pmet_HMR_6652	Retinol metabolism	131.803
arm_HMR_6652_REV	(reversible) (arm)	m01231r + 2 m02039r + m02553r -> pmet_HMR_6652_REV	Retinol metabolism	131.803
arm_HMR_6674	(arm)	m00349r + m02040r + m02552r -> pmet_HMR_6674	Retinol metabolism	131.803
arm_HMR_6674_REV	(reversible) (arm)	2 m02039r + m02553r + m02833r -> pmet_HMR_6674_REV	Retinol metabolism	131.803
arm_HMR_6675	(arm)	m00349c + m02040c + m02552c -> pmet_HMR_6675	Retinol metabolism	131.803
arm_HMR_6675_REV	(reversible) (arm)	m00350c + 2 m02039c + m02553c -> pmet_HMR_6675_REV	Retinol metabolism	131.803
arm_HMR_6676	(arm)	m00349r + m02040r + m02552r -> pmet_HMR_6676	Retinol metabolism	131.803
arm_HMR_6676_REV	(reversible) (arm)	m00350r + 2 m02039r + m02553r -> pmet_HMR_6676_REV	Retinol metabolism	131.803
HMR_1050No8	(No8)	2.0276e-07 prot_P46439 + pmet_HMR_1050 -> m02097c	Arachidonic acid metabolism	128.557
HMR_1050_REVNo8	(reversible) (No8)	2.8935e-08 prot_P46439 + pmet_HMR_1050_REV -> m02026c + m02096c	Arachidonic acid metabolism	128.557
HMR_1053No8	(No8)	2.0276e-07 prot_P46439 + pmet_HMR_1053 -> m02097r	Arachidonic acid metabolism	128.557
HMR_1053_REVNo8	(reversible) (No8)	2.8935e-08 prot_P46439 + pmet_HMR_1053_REV -> m02026r + m02096r	Arachidonic acid metabolism	128.557
HMR_1054No8	(No8)	2.0276e-07 prot_P46439 + pmet_HMR_1054 -> m02097p	Arachidonic acid metabolism	128.557
HMR_1054_REVNo8	(reversible) (No8)	2.8935e-08 prot_P46439 + pmet_HMR_1054_REV -> m02026p + m02096p	Arachidonic acid metabolism	128.557
HMR_1119No8	(No8)	2.0276e-07 prot_P46439 + pmet_HMR_1119 -> m00333c	Leukotriene metabolism	128.557
HMR_1119_REVNo8	(reversible) (No8)	2.8935e-08 prot_P46439 + pmet_HMR_1119_REV -> m00326c + m02026c	Leukotriene metabolism	128.557
HMR_1120No8	(No8)	2.0276e-07 prot_P46439 + pmet_HMR_1120 -> m00333m	Leukotriene metabolism	128.557
HMR_1120_REVNo8	(reversible) (No8)	2.8935e-08 prot_P46439 + pmet_HMR_1120_REV -> m00326m + m02026m	Leukotriene metabolism	128.557
HMR_1121No8	(No8)	2.0276e-07 prot_P46439 + pmet_HMR_1121 -> m00333r	Leukotriene metabolism	128.557
HMR_1121_REVNo8	(reversible) (No8)	2.8935e-08 prot_P46439 + pmet_HMR_1121_REV -> m00326r + m02026r	Leukotriene metabolism	128.557
HMR_1122No8	(No8)	2.0276e-07 prot_P46439 + pmet_HMR_1122 -> m00333p	Leukotriene metabolism	128.557
HMR_1122_REVNo8	(reversible) (No8)	2.8935e-08 prot_P46439 + pmet_HMR_1122_REV -> m00326p + m02026p	Leukotriene metabolism	128.557
HMR_1367No8	(No8)	2.0276e-07 prot_P46439 + pmet_HMR_1367 -> m02864c	Prostaglandin biosynthesis	128.557
HMR_1367_REVNo8	(reversible) (No8)	2.8935e-08 prot_P46439 + pmet_HMR_1367_REV -> m02026c + m02796c	Prostaglandin biosynthesis	128.557
HMR_1370No8	(No8)	2.0276e-07 prot_P46439 + pmet_HMR_1370 -> m02863c	Prostaglandin biosynthesis	128.557
HMR_1370_REVNo8	(reversible) (No8)	2.8935e-08 prot_P46439 + pmet_HMR_1370_REV -> m02026c + m02777c	Prostaglandin biosynthesis	128.557
HMR_1379No8	(No8)	2.0276e-07 prot_P46439 + pmet_HMR_1379 -> m02860c	Prostaglandin biosynthesis	128.557
HMR_1379_REVNo8	(reversible) (No8)	2.8935e-08 prot_P46439 + pmet_HMR_1379_REV -> m01662c + m02026c	Prostaglandin biosynthesis	128.557
HMR_1384No8	(No8)	2.0276e-07 prot_P46439 + pmet_HMR_1384 -> m02859c	Prostaglandin biosynthesis	128.557
HMR_1384_REVNo8	(reversible) (No8)	2.8935e-08 prot_P46439 + pmet_HMR_1384_REV -> m01234c + m02026c	Prostaglandin biosynthesis	128.557
HMR_1398No8	(No8)	2.0276e-07 prot_P46439 + pmet_HMR_1398 -> m02862c	Prostaglandin biosynthesis	128.557
HMR_1398_REVNo8	(reversible) (No8)	2.8935e-08 prot_P46439 + pmet_HMR_1398_REV -> m02026c + m02776c	Prostaglandin biosynthesis	128.557
HMR_2068No8	(No8)	2.8935e-08 prot_P46439 + pmet_HMR_2068 -> m01791c + m02026c	Estrogen metabolism	128.557
HMR_2068_REVNo8	(reversible) (No8)	2.0276e-07 prot_P46439 + pmet_HMR_2068_REV -> m00651c	Estrogen metabolism	128.557
HMR_2069No8	(No8)	2.8935e-08 prot_P46439 + pmet_HMR_2069 -> m01791m + m02026m	Estrogen metabolism	128.557
HMR_2069_REVNo8	(reversible) (No8)	2.0276e-07 prot_P46439 + pmet_HMR_2069_REV -> m00651m	Estrogen metabolism	128.557
HMR_2070No8	(No8)	2.8935e-08 prot_P46439 + pmet_HMR_2070 -> m01791r + m02026r	Estrogen metabolism	128.557
HMR_2070_REVNo8	(reversible) (No8)	2.0276e-07 prot_P46439 + pmet_HMR_2070_REV -> m00651r	Estrogen metabolism	128.557
HMR_2071No8	(No8)	2.8935e-08 prot_P46439 + pmet_HMR_2071 -> m01791p + m02026p	Estrogen metabolism	128.557
HMR_2071_REVNo8	(reversible) (No8)	2.0276e-07 prot_P46439 + pmet_HMR_2071_REV -> m00651p	Estrogen metabolism	128.557
HMR_2072No8	(No8)	2.8935e-08 prot_P46439 + pmet_HMR_2072 -> m01791c + m02026c	Estrogen metabolism	128.557
HMR_2072_REVNo8	(reversible) (No8)	2.0276e-07 prot_P46439 + pmet_HMR_2072_REV -> m00652c	Estrogen metabolism	128.557
HMR_2073No8	(No8)	2.8935e-08 prot_P46439 + pmet_HMR_2073 -> m01791m + m02026m	Estrogen metabolism	128.557
HMR_2073_REVNo8	(reversible) (No8)	2.0276e-07 prot_P46439 + pmet_HMR_2073_REV -> m00652m	Estrogen metabolism	128.557
HMR_2074No8	(No8)	2.8935e-08 prot_P46439 + pmet_HMR_2074 -> m01791r + m02026r	Estrogen metabolism	128.557
HMR_2074_REVNo8	(reversible) (No8)	2.0276e-07 prot_P46439 + pmet_HMR_2074_REV -> m00652r	Estrogen metabolism	128.557
HMR_2075No8	(No8)	2.8935e-08 prot_P46439 + pmet_HMR_2075 -> m01791p + m02026p	Estrogen metabolism	128.557
HMR_2075_REVNo8	(reversible) (No8)	2.0276e-07 prot_P46439 + pmet_HMR_2075_REV -> m00652p	Estrogen metabolism	128.557
HMR_2083No8	(No8)	2.8935e-08 prot_P46439 + pmet_HMR_2083 -> m01793c + m02026c	Estrogen metabolism	128.557
HMR_2083_REVNo8	(reversible) (No8)	2.0276e-07 prot_P46439 + pmet_HMR_2083_REV -> m01001c	Estrogen metabolism	128.557
HMR_2084No8	(No8)	2.8935e-08 prot_P46439 + pmet_HMR_2084 -> m01793m + m02026m	Estrogen metabolism	128.557
HMR_2084_REVNo8	(reversible) (No8)	2.0276e-07 prot_P46439 + pmet_HMR_2084_REV -> m01001m	Estrogen metabolism	128.557
HMR_2085No8	(No8)	2.8935e-08 prot_P46439 + pmet_HMR_2085 -> m01793r + m02026r	Estrogen metabolism	128.557
HMR_2085_REVNo8	(reversible) (No8)	2.0276e-07 prot_P46439 + pmet_HMR_2085_REV -> m01001r	Estrogen metabolism	128.557
HMR_2086No8	(No8)	2.8935e-08 prot_P46439 + pmet_HMR_2086 -> m01793p + m02026p	Estrogen metabolism	128.557
HMR_2086_REVNo8	(reversible) (No8)	2.0276e-07 prot_P46439 + pmet_HMR_2086_REV -> m01001p	Estrogen metabolism	128.557
HMR_2095No8	(No8)	2.0276e-07 prot_P46439 + pmet_HMR_2095 -> m00987c	Estrogen metabolism	128.557
HMR_2095_REVNo8	(reversible) (No8)	2.8935e-08 prot_P46439 + pmet_HMR_2095_REV -> m00412c + m02026c	Estrogen metabolism	128.557
HMR_2096No8	(No8)	2.0276e-07 prot_P46439 + pmet_HMR_2096 -> m00987m	Estrogen metabolism	128.557
HMR_2096_REVNo8	(reversible) (No8)	2.8935e-08 prot_P46439 + pmet_HMR_2096_REV -> m00412m + m02026m	Estrogen metabolism	128.557
HMR_2097No8	(No8)	2.0276e-07 prot_P46439 + pmet_HMR_2097 -> m00987r	Estrogen metabolism	128.557
HMR_2097_REVNo8	(reversible) (No8)	2.8935e-08 prot_P46439 + pmet_HMR_2097_REV -> m00412r + m02026r	Estrogen metabolism	128.557
HMR_2098No8	(No8)	2.0276e-07 prot_P46439 + pmet_HMR_2098 -> m00987p	Estrogen metabolism	128.557
HMR_2098_REVNo8	(reversible) (No8)	2.8935e-08 prot_P46439 + pmet_HMR_2098_REV -> m00412p + m02026p	Estrogen metabolism	128.557
HMR_2106No8	(No8)	2.0276e-07 prot_P46439 + pmet_HMR_2106 -> m00642c	Estrogen metabolism	128.557
HMR_2106_REVNo8	(reversible) (No8)	2.8935e-08 prot_P46439 + pmet_HMR_2106_REV -> m00410c + m02026c	Estrogen metabolism	128.557
HMR_2107No8	(No8)	2.0276e-07 prot_P46439 + pmet_HMR_2107 -> m00642m	Estrogen metabolism	128.557
HMR_2107_REVNo8	(reversible) (No8)	2.8935e-08 prot_P46439 + pmet_HMR_2107_REV -> m00410m + m02026m	Estrogen metabolism	128.557
HMR_2108No8	(No8)	2.0276e-07 prot_P46439 + pmet_HMR_2108 -> m00642r	Estrogen metabolism	128.557
HMR_2108_REVNo8	(reversible) (No8)	2.8935e-08 prot_P46439 + pmet_HMR_2108_REV -> m00410r + m02026r	Estrogen metabolism	128.557
HMR_2109No8	(No8)	2.0276e-07 prot_P46439 + pmet_HMR_2109 -> m00642p	Estrogen metabolism	128.557
HMR_2109_REVNo8	(reversible) (No8)	2.8935e-08 prot_P46439 + pmet_HMR_2109_REV -> m00410p + m02026p	Estrogen metabolism	128.557
HMR_2110No8	(No8)	2.0276e-07 prot_P46439 + pmet_HMR_2110 -> m00641c	Estrogen metabolism	128.557
HMR_2110_REVNo8	(reversible) (No8)	2.8935e-08 prot_P46439 + pmet_HMR_2110_REV -> m00410c + m02026c	Estrogen metabolism	128.557
HMR_2111No8	(No8)	2.0276e-07 prot_P46439 + pmet_HMR_2111 -> m00641m	Estrogen metabolism	128.557
HMR_2111_REVNo8	(reversible) (No8)	2.8935e-08 prot_P46439 + pmet_HMR_2111_REV -> m00410m + m02026m	Estrogen metabolism	128.557
HMR_2112No8	(No8)	2.0276e-07 prot_P46439 + pmet_HMR_2112 -> m00641r	Estrogen metabolism	128.557
HMR_2112_REVNo8	(reversible) (No8)	2.8935e-08 prot_P46439 + pmet_HMR_2112_REV -> m00410r + m02026r	Estrogen metabolism	128.557
HMR_2113No8	(No8)	2.0276e-07 prot_P46439 + pmet_HMR_2113 -> m00641p	Estrogen metabolism	128.557
HMR_2113_REVNo8	(reversible) (No8)	2.8935e-08 prot_P46439 + pmet_HMR_2113_REV -> m00410p + m02026p	Estrogen metabolism	128.557
HMR_6723No8	(No8)	pmet_HMR_6723 + 2.0276e-07 prot_P46439 -> m01979c + m02040c	Phenylalanine, tyrosine and tryptophan biosynthesis	128.557
HMR_6723_REVNo8	(reversible) (No8)	2.8935e-08 prot_P46439 + pmet_HMR_6723_REV -> m00787c + m02026c	Phenylalanine, tyrosine and tryptophan biosynthesis	128.557
HMR_6811No8	(No8)	2.8935e-08 prot_P46439 + pmet_HMR_6811 -> m01738c + m02026c	Phenylalanine, tyrosine and tryptophan biosynthesis	128.557
HMR_6811_REVNo8	(reversible) (No8)	2.0276e-07 prot_P46439 + pmet_HMR_6811_REV -> m01138c	Phenylalanine, tyrosine and tryptophan biosynthesis	128.557
HMR_6815No8	(No8)	2.8935e-08 prot_P46439 + pmet_HMR_6815 -> m01739c + m02026c	Phenylalanine, tyrosine and tryptophan biosynthesis	128.557
HMR_6815_REVNo8	(reversible) (No8)	2.0276e-07 prot_P46439 + pmet_HMR_6815_REV -> m01136c	Phenylalanine, tyrosine and tryptophan biosynthesis	128.557
HMR_6820No8	(No8)	2.8935e-08 prot_P46439 + pmet_HMR_6820 -> m01292c + m02026c	Phenylalanine, tyrosine and tryptophan biosynthesis	128.557
HMR_6820_REVNo8	(reversible) (No8)	2.0276e-07 prot_P46439 + pmet_HMR_6820_REV -> m01135c	Phenylalanine, tyrosine and tryptophan biosynthesis	128.557
HMR_6824No8	(No8)	2.8935e-08 prot_P46439 + pmet_HMR_6824 -> m02026c + m02618c	Phenylalanine, tyrosine and tryptophan biosynthesis	128.557
HMR_6824_REVNo8	(reversible) (No8)	2.0276e-07 prot_P46439 + pmet_HMR_6824_REV -> m01140c	Phenylalanine, tyrosine and tryptophan biosynthesis	128.557
HMR_6883No8	(No8)	2.8935e-08 prot_P46439 + pmet_HMR_6883 -> m02026c + m02356c	Phenylalanine, tyrosine and tryptophan biosynthesis	128.557
HMR_6883_REVNo8	(reversible) (No8)	2.0276e-07 prot_P46439 + pmet_HMR_6883_REV -> m01139c	Phenylalanine, tyrosine and tryptophan biosynthesis	128.557
HMR_6886No8	(No8)	2.8935e-08 prot_P46439 + pmet_HMR_6886 -> m02026c + m02355c	Phenylalanine, tyrosine and tryptophan biosynthesis	128.557
HMR_6886_REVNo8	(reversible) (No8)	2.0276e-07 prot_P46439 + pmet_HMR_6886_REV -> m01137c	Phenylalanine, tyrosine and tryptophan biosynthesis	128.557
HMR_6995No6	(No6)	2.8935e-08 prot_P46439 + pmet_HMR_6995 -> m01375c + m02026c + m02039c	Xenobiotics metabolism	128.557
HMR_6995_REVNo6	(reversible) (No6)	2.0276e-07 prot_P46439 + pmet_HMR_6995_REV -> m00944c	Xenobiotics metabolism	128.557
arm_HMR_1050	(arm)	m02026c + m02096c -> pmet_HMR_1050	Arachidonic acid metabolism	128.557
arm_HMR_1050_REV	(reversible) (arm)	m02097c -> pmet_HMR_1050_REV	Arachidonic acid metabolism	128.557
arm_HMR_1053	(arm)	m02026r + m02096r -> pmet_HMR_1053	Arachidonic acid metabolism	128.557
arm_HMR_1053_REV	(reversible) (arm)	m02097r -> pmet_HMR_1053_REV	Arachidonic acid metabolism	128.557
arm_HMR_1054	(arm)	m02026p + m02096p -> pmet_HMR_1054	Arachidonic acid metabolism	128.557
arm_HMR_1054_REV	(reversible) (arm)	m02097p -> pmet_HMR_1054_REV	Arachidonic acid metabolism	128.557
arm_HMR_1119	(arm)	m00326c + m02026c -> pmet_HMR_1119	Leukotriene metabolism	128.557
arm_HMR_1119_REV	(reversible) (arm)	m00333c -> pmet_HMR_1119_REV	Leukotriene metabolism	128.557
arm_HMR_1120	(arm)	m00326m + m02026m -> pmet_HMR_1120	Leukotriene metabolism	128.557
arm_HMR_1120_REV	(reversible) (arm)	m00333m -> pmet_HMR_1120_REV	Leukotriene metabolism	128.557
arm_HMR_1121	(arm)	m00326r + m02026r -> pmet_HMR_1121	Leukotriene metabolism	128.557
arm_HMR_1121_REV	(reversible) (arm)	m00333r -> pmet_HMR_1121_REV	Leukotriene metabolism	128.557
arm_HMR_1122	(arm)	m00326p + m02026p -> pmet_HMR_1122	Leukotriene metabolism	128.557
arm_HMR_1122_REV	(reversible) (arm)	m00333p -> pmet_HMR_1122_REV	Leukotriene metabolism	128.557
arm_HMR_1367	(arm)	m02026c + m02796c -> pmet_HMR_1367	Prostaglandin biosynthesis	128.557
arm_HMR_1367_REV	(reversible) (arm)	m02864c -> pmet_HMR_1367_REV	Prostaglandin biosynthesis	128.557
arm_HMR_1370	(arm)	m02026c + m02777c -> pmet_HMR_1370	Prostaglandin biosynthesis	128.557
arm_HMR_1370_REV	(reversible) (arm)	m02863c -> pmet_HMR_1370_REV	Prostaglandin biosynthesis	128.557
arm_HMR_1379	(arm)	m01662c + m02026c -> pmet_HMR_1379	Prostaglandin biosynthesis	128.557
arm_HMR_1379_REV	(reversible) (arm)	m02860c -> pmet_HMR_1379_REV	Prostaglandin biosynthesis	128.557
arm_HMR_1384	(arm)	m01234c + m02026c -> pmet_HMR_1384	Prostaglandin biosynthesis	128.557
arm_HMR_1384_REV	(reversible) (arm)	m02859c -> pmet_HMR_1384_REV	Prostaglandin biosynthesis	128.557
arm_HMR_1398	(arm)	m02026c + m02776c -> pmet_HMR_1398	Prostaglandin biosynthesis	128.557
arm_HMR_1398_REV	(reversible) (arm)	m02862c -> pmet_HMR_1398_REV	Prostaglandin biosynthesis	128.557
arm_HMR_2068	(arm)	m00651c -> pmet_HMR_2068	Estrogen metabolism	128.557
arm_HMR_2068_REV	(reversible) (arm)	m01791c + m02026c -> pmet_HMR_2068_REV	Estrogen metabolism	128.557
arm_HMR_2069	(arm)	m00651m -> pmet_HMR_2069	Estrogen metabolism	128.557
arm_HMR_2069_REV	(reversible) (arm)	m01791m + m02026m -> pmet_HMR_2069_REV	Estrogen metabolism	128.557
arm_HMR_2070	(arm)	m00651r -> pmet_HMR_2070	Estrogen metabolism	128.557
arm_HMR_2070_REV	(reversible) (arm)	m01791r + m02026r -> pmet_HMR_2070_REV	Estrogen metabolism	128.557
arm_HMR_2071	(arm)	m00651p -> pmet_HMR_2071	Estrogen metabolism	128.557
arm_HMR_2071_REV	(reversible) (arm)	m01791p + m02026p -> pmet_HMR_2071_REV	Estrogen metabolism	128.557
arm_HMR_2072	(arm)	m00652c -> pmet_HMR_2072	Estrogen metabolism	128.557
arm_HMR_2072_REV	(reversible) (arm)	m01791c + m02026c -> pmet_HMR_2072_REV	Estrogen metabolism	128.557
arm_HMR_2073	(arm)	m00652m -> pmet_HMR_2073	Estrogen metabolism	128.557
arm_HMR_2073_REV	(reversible) (arm)	m01791m + m02026m -> pmet_HMR_2073_REV	Estrogen metabolism	128.557
arm_HMR_2074	(arm)	m00652r -> pmet_HMR_2074	Estrogen metabolism	128.557
arm_HMR_2074_REV	(reversible) (arm)	m01791r + m02026r -> pmet_HMR_2074_REV	Estrogen metabolism	128.557
arm_HMR_2075	(arm)	m00652p -> pmet_HMR_2075	Estrogen metabolism	128.557
arm_HMR_2075_REV	(reversible) (arm)	m01791p + m02026p -> pmet_HMR_2075_REV	Estrogen metabolism	128.557
arm_HMR_2083	(arm)	m01001c -> pmet_HMR_2083	Estrogen metabolism	128.557
arm_HMR_2083_REV	(reversible) (arm)	m01793c + m02026c -> pmet_HMR_2083_REV	Estrogen metabolism	128.557
arm_HMR_2084	(arm)	m01001m -> pmet_HMR_2084	Estrogen metabolism	128.557
arm_HMR_2084_REV	(reversible) (arm)	m01793m + m02026m -> pmet_HMR_2084_REV	Estrogen metabolism	128.557
arm_HMR_2085	(arm)	m01001r -> pmet_HMR_2085	Estrogen metabolism	128.557
arm_HMR_2085_REV	(reversible) (arm)	m01793r + m02026r -> pmet_HMR_2085_REV	Estrogen metabolism	128.557
arm_HMR_2086	(arm)	m01001p -> pmet_HMR_2086	Estrogen metabolism	128.557
arm_HMR_2086_REV	(reversible) (arm)	m01793p + m02026p -> pmet_HMR_2086_REV	Estrogen metabolism	128.557
arm_HMR_2095	(arm)	m00412c + m02026c -> pmet_HMR_2095	Estrogen metabolism	128.557
arm_HMR_2095_REV	(reversible) (arm)	m00987c -> pmet_HMR_2095_REV	Estrogen metabolism	128.557
arm_HMR_2096	(arm)	m00412m + m02026m -> pmet_HMR_2096	Estrogen metabolism	128.557
arm_HMR_2096_REV	(reversible) (arm)	m00987m -> pmet_HMR_2096_REV	Estrogen metabolism	128.557
arm_HMR_2097	(arm)	m00412r + m02026r -> pmet_HMR_2097	Estrogen metabolism	128.557
arm_HMR_2097_REV	(reversible) (arm)	m00987r -> pmet_HMR_2097_REV	Estrogen metabolism	128.557
arm_HMR_2098	(arm)	m00412p + m02026p -> pmet_HMR_2098	Estrogen metabolism	128.557
arm_HMR_2098_REV	(reversible) (arm)	m00987p -> pmet_HMR_2098_REV	Estrogen metabolism	128.557
arm_HMR_2106	(arm)	m00410c + m02026c -> pmet_HMR_2106	Estrogen metabolism	128.557
arm_HMR_2106_REV	(reversible) (arm)	m00642c -> pmet_HMR_2106_REV	Estrogen metabolism	128.557
arm_HMR_2107	(arm)	m00410m + m02026m -> pmet_HMR_2107	Estrogen metabolism	128.557
arm_HMR_2107_REV	(reversible) (arm)	m00642m -> pmet_HMR_2107_REV	Estrogen metabolism	128.557
arm_HMR_2108	(arm)	m00410r + m02026r -> pmet_HMR_2108	Estrogen metabolism	128.557
arm_HMR_2108_REV	(reversible) (arm)	m00642r -> pmet_HMR_2108_REV	Estrogen metabolism	128.557
arm_HMR_2109	(arm)	m00410p + m02026p -> pmet_HMR_2109	Estrogen metabolism	128.557
arm_HMR_2109_REV	(reversible) (arm)	m00642p -> pmet_HMR_2109_REV	Estrogen metabolism	128.557
arm_HMR_2110	(arm)	m00410c + m02026c -> pmet_HMR_2110	Estrogen metabolism	128.557
arm_HMR_2110_REV	(reversible) (arm)	m00641c -> pmet_HMR_2110_REV	Estrogen metabolism	128.557
arm_HMR_2111	(arm)	m00410m + m02026m -> pmet_HMR_2111	Estrogen metabolism	128.557
arm_HMR_2111_REV	(reversible) (arm)	m00641m -> pmet_HMR_2111_REV	Estrogen metabolism	128.557
arm_HMR_2112	(arm)	m00410r + m02026r -> pmet_HMR_2112	Estrogen metabolism	128.557
arm_HMR_2112_REV	(reversible) (arm)	m00641r -> pmet_HMR_2112_REV	Estrogen metabolism	128.557
arm_HMR_2113	(arm)	m00410p + m02026p -> pmet_HMR_2113	Estrogen metabolism	128.557
arm_HMR_2113_REV	(reversible) (arm)	m00641p -> pmet_HMR_2113_REV	Estrogen metabolism	128.557
arm_HMR_6723	(arm)	m00787c + m02026c -> pmet_HMR_6723	Phenylalanine, tyrosine and tryptophan biosynthesis	128.557
arm_HMR_6723_REV	(reversible) (arm)	m01979c + m02040c -> pmet_HMR_6723_REV	Phenylalanine, tyrosine and tryptophan biosynthesis	128.557
arm_HMR_6811	(arm)	m01138c -> pmet_HMR_6811	Phenylalanine, tyrosine and tryptophan biosynthesis	128.557
arm_HMR_6811_REV	(reversible) (arm)	m01738c + m02026c -> pmet_HMR_6811_REV	Phenylalanine, tyrosine and tryptophan biosynthesis	128.557
arm_HMR_6815	(arm)	m01136c -> pmet_HMR_6815	Phenylalanine, tyrosine and tryptophan biosynthesis	128.557
arm_HMR_6815_REV	(reversible) (arm)	m01739c + m02026c -> pmet_HMR_6815_REV	Phenylalanine, tyrosine and tryptophan biosynthesis	128.557
arm_HMR_6820	(arm)	m01135c -> pmet_HMR_6820	Phenylalanine, tyrosine and tryptophan biosynthesis	128.557
arm_HMR_6820_REV	(reversible) (arm)	m01292c + m02026c -> pmet_HMR_6820_REV	Phenylalanine, tyrosine and tryptophan biosynthesis	128.557
arm_HMR_6824	(arm)	m01140c -> pmet_HMR_6824	Phenylalanine, tyrosine and tryptophan biosynthesis	128.557
arm_HMR_6824_REV	(reversible) (arm)	m02026c + m02618c -> pmet_HMR_6824_REV	Phenylalanine, tyrosine and tryptophan biosynthesis	128.557
arm_HMR_6883	(arm)	m01139c -> pmet_HMR_6883	Phenylalanine, tyrosine and tryptophan biosynthesis	128.557
arm_HMR_6883_REV	(reversible) (arm)	m02026c + m02356c -> pmet_HMR_6883_REV	Phenylalanine, tyrosine and tryptophan biosynthesis	128.557
arm_HMR_6886	(arm)	m01137c -> pmet_HMR_6886	Phenylalanine, tyrosine and tryptophan biosynthesis	128.557
arm_HMR_6886_REV	(reversible) (arm)	m02026c + m02355c -> pmet_HMR_6886_REV	Phenylalanine, tyrosine and tryptophan biosynthesis	128.557
arm_HMR_6995	(arm)	m00944c -> pmet_HMR_6995	Xenobiotics metabolism	128.557
arm_HMR_6995_REV	(reversible) (arm)	m01375c + m02026c + m02039c -> pmet_HMR_6995_REV	Xenobiotics metabolism	128.557
HMR_0025No5	(No5)	pmet_HMR_0025 + 2.0455e-06 prot_P27469 -> m01268c	Transport reactions	128.082
HMR_0030No10	(No10)	6.6138e-11 prot_Q6Q788 + pmet_HMR_0030 -> m01268n	Transport reactions	128.082
HMR_0030No2	(No2)	3.2451e-05 prot_P21439 + pmet_HMR_0030 -> m01268n	Transport reactions	128.082
arm_HMR_0025	(arm)	m01268n -> pmet_HMR_0025	Transport reactions	128.082
arm_HMR_0030	(arm)	m01268c -> pmet_HMR_0030	Transport reactions	128.082
prot_P15259_exchange	prot_P15259_exchange	-> prot_P15259	Protein translation and secretion	124.236
HMR_0991No1	(No1)	2.1701e-06 prot_Q9HB55 + pmet_HMR_0991 -> m00390c	Arachidonic acid metabolism	116.131
HMR_0991_REVNo1	(reversible) (No1)	2.1701e-06 prot_Q9HB55 + pmet_HMR_0991_REV -> m00380c	Arachidonic acid metabolism	116.131
HMR_0992No1	(No1)	2.1701e-06 prot_Q9HB55 + pmet_HMR_0992 -> m00390c + m02040c	Arachidonic acid metabolism	116.131
HMR_0992_REVNo1	(reversible) (No1)	2.1701e-06 prot_Q9HB55 + pmet_HMR_0992_REV -> m00276c	Arachidonic acid metabolism	116.131
HMR_0993No1	(No1)	2.1701e-06 prot_Q9HB55 + pmet_HMR_0993 -> m00380c	Arachidonic acid metabolism	116.131
HMR_0993_REVNo1	(reversible) (No1)	2.1701e-06 prot_Q9HB55 + pmet_HMR_0993_REV -> m00296c	Arachidonic acid metabolism	116.131
HMR_0994No1	(No1)	2.1701e-06 prot_Q9HB55 + pmet_HMR_0994 -> m00296c + m02040c	Arachidonic acid metabolism	116.131
HMR_0994_REVNo1	(reversible) (No1)	2.1701e-06 prot_Q9HB55 + pmet_HMR_0994_REV -> m00280c	Arachidonic acid metabolism	116.131
HMR_1149No1	(No1)	0.00010808 prot_Q9HB55 + pmet_HMR_1149 -> m01152c + m02554c	Leukotriene metabolism	116.131
HMR_1149_REVNo1	(reversible) (No1)	2.1701e-06 prot_Q9HB55 + pmet_HMR_1149_REV -> m01124c + m02039c + m02555c	Leukotriene metabolism	116.131
HMR_1150No1	(No1)	0.00010808 prot_Q9HB55 + pmet_HMR_1150 -> m01152m + m02554m	Leukotriene metabolism	116.131
HMR_1150_REVNo1	(reversible) (No1)	2.1701e-06 prot_Q9HB55 + pmet_HMR_1150_REV -> m01124m + m02039m + m02555m	Leukotriene metabolism	116.131
HMR_1151No1	(No1)	0.00010808 prot_Q9HB55 + pmet_HMR_1151 -> m01152r + m02554r	Leukotriene metabolism	116.131
HMR_1151_REVNo1	(reversible) (No1)	2.1701e-06 prot_Q9HB55 + pmet_HMR_1151_REV -> m01124r + m02039r + m02555r	Leukotriene metabolism	116.131
HMR_1152No1	(No1)	0.00010808 prot_Q9HB55 + pmet_HMR_1152 -> m01152p + m02554p	Leukotriene metabolism	116.131
HMR_1152_REVNo1	(reversible) (No1)	2.1701e-06 prot_Q9HB55 + pmet_HMR_1152_REV -> m01124p + m02039p + m02555p	Leukotriene metabolism	116.131
HMR_1153No1	(No1)	0.00010808 prot_Q9HB55 + pmet_HMR_1153 -> m01153c + m02554c	Leukotriene metabolism	116.131
HMR_1153_REVNo1	(reversible) (No1)	2.1701e-06 prot_Q9HB55 + pmet_HMR_1153_REV -> m01152c + m02039c + m02555c	Leukotriene metabolism	116.131
HMR_1154No1	(No1)	0.00010808 prot_Q9HB55 + pmet_HMR_1154 -> m01153m + m02554m	Leukotriene metabolism	116.131
HMR_1154_REVNo1	(reversible) (No1)	2.1701e-06 prot_Q9HB55 + pmet_HMR_1154_REV -> m01152m + m02039m + m02555m	Leukotriene metabolism	116.131
HMR_1155No1	(No1)	0.00010808 prot_Q9HB55 + pmet_HMR_1155 -> m01153r + m02554r	Leukotriene metabolism	116.131
HMR_1155_REVNo1	(reversible) (No1)	2.1701e-06 prot_Q9HB55 + pmet_HMR_1155_REV -> m01152r + m02039r + m02555r	Leukotriene metabolism	116.131
HMR_1156No1	(No1)	0.00010808 prot_Q9HB55 + pmet_HMR_1156 -> m01153p + m02554p	Leukotriene metabolism	116.131
HMR_1156_REVNo1	(reversible) (No1)	2.1701e-06 prot_Q9HB55 + pmet_HMR_1156_REV -> m01152p + m02039p + m02555p	Leukotriene metabolism	116.131
HMR_1193No1	(No1)	0.00010808 prot_Q9HB55 + pmet_HMR_1193 -> m01151c + m02554c	Leukotriene metabolism	116.131
HMR_1193_REVNo1	(reversible) (No1)	2.1701e-06 prot_Q9HB55 + pmet_HMR_1193_REV -> m01118c + m02039c + m02555c	Leukotriene metabolism	116.131
HMR_1194No1	(No1)	0.00010808 prot_Q9HB55 + pmet_HMR_1194 -> m01151m + m02554m	Leukotriene metabolism	116.131
HMR_1194_REVNo1	(reversible) (No1)	2.1701e-06 prot_Q9HB55 + pmet_HMR_1194_REV -> m01118m + m02039m + m02555m	Leukotriene metabolism	116.131
HMR_1195No1	(No1)	0.00010808 prot_Q9HB55 + pmet_HMR_1195 -> m01151r + m02554r	Leukotriene metabolism	116.131
HMR_1195_REVNo1	(reversible) (No1)	2.1701e-06 prot_Q9HB55 + pmet_HMR_1195_REV -> m01118r + m02039r + m02555r	Leukotriene metabolism	116.131
HMR_1196No1	(No1)	0.00010808 prot_Q9HB55 + pmet_HMR_1196 -> m01151p + m02554p	Leukotriene metabolism	116.131
HMR_1196_REVNo1	(reversible) (No1)	2.1701e-06 prot_Q9HB55 + pmet_HMR_1196_REV -> m01118p + m02039p + m02555p	Leukotriene metabolism	116.131
HMR_7019No1	(No1)	0.00010808 prot_Q9HB55 + pmet_HMR_7019 -> m01301c + m02040c + m02554c	Xenobiotics metabolism	116.131
HMR_7019_REVNo1	(reversible) (No1)	2.1701e-06 prot_Q9HB55 + pmet_HMR_7019_REV -> m01300c + m02039c + m02555c + m02630c	Xenobiotics metabolism	116.131
HMR_7048No1	(No1)	0.00010808 prot_Q9HB55 + pmet_HMR_7048 -> m01405c + m02040c + m02554c	Xenobiotics metabolism	116.131
HMR_7048_REVNo1	(reversible) (No1)	2.1701e-06 prot_Q9HB55 + pmet_HMR_7048_REV -> m01403c + m02039c + m02555c + m02630c	Xenobiotics metabolism	116.131
arm_HMR_7019	(arm)	m01300c + m02039c + m02555c + m02630c -> pmet_HMR_7019	Xenobiotics metabolism	116.131
arm_HMR_7019_REV	(reversible) (arm)	m01301c + m02040c + m02554c -> pmet_HMR_7019_REV	Xenobiotics metabolism	116.131
arm_HMR_7048	(arm)	m01403c + m02039c + m02555c + m02630c -> pmet_HMR_7048	Xenobiotics metabolism	116.131
arm_HMR_7048_REV	(reversible) (arm)	m01405c + m02040c + m02554c -> pmet_HMR_7048_REV	Xenobiotics metabolism	116.131
HMR_6512No11	(No11)	2.8607e-07 prot_Q8IWX5 + pmet_HMR_6512 -> m01802s	Transport reactions	113.151
HMR_6512_REVNo11	(reversible) (No11)	2.8607e-07 prot_Q8IWX5 + pmet_HMR_6512_REV -> m01802c	Transport reactions	113.151
arm_HMR_6512	(arm)	m01802c -> pmet_HMR_6512	Transport reactions	113.151
arm_HMR_6512_REV	(reversible) (arm)	m01802s -> pmet_HMR_6512_REV	Transport reactions	113.151
THMt3	Thiamine Transport in via Proton Antiport	m02039c + m02982s -> m02039s + m02982c	Transport reactions	106.005
THMt3_REV	Thiamine Transport in via Proton Antiport (reversible)	m02039s + m02982c -> m02039c + m02982s	Transport reactions	106.005
HMR_4549No21	(No21)	0.00053419 prot_Q8IZP7 + pmet_HMR_4549 -> m01161c + m02949c	Serotonin and melatonin biosynthesis	102.992
HMR_4549_REVNo21	(reversible) (No21)	0.00053419 prot_Q8IZP7 + pmet_HMR_4549_REV -> m01162c + m02039c	Serotonin and melatonin biosynthesis	102.992
HMR_6059		m02039s + m02982s -> m02039c + m02982c	Transport reactions	101.316
arm_HMR_4584	(arm)	m01371c + m01619c -> pmet_HMR_4584	Glycine, serine and threonine metabolism	97.8092
arm_HMR_4584_REV	(reversible) (arm)	m01285c + m01620c + m02039c -> pmet_HMR_4584_REV	Glycine, serine and threonine metabolism	97.8092
arm_HMR_8427	(arm)	m01285m + m01620m + m02039m -> pmet_HMR_8427	Arginine and proline metabolism	97.8092
arm_HMR_8427_REV	(reversible) (arm)	m01371m + m01619m -> pmet_HMR_8427_REV	Arginine and proline metabolism	97.8092
HMR_4584No2	(No2)	6.6613e-07 prot_P17540 + pmet_HMR_4584 -> m01285c + m01620c + m02039c	Glycine, serine and threonine metabolism	95.8044
HMR_4584_REVNo2	(reversible) (No2)	5.7475e-07 prot_P17540 + pmet_HMR_4584_REV -> m01371c + m01619c	Glycine, serine and threonine metabolism	95.8044
HMR_8427No2	(No2)	pmet_HMR_8427 + 5.7475e-07 prot_P17540 -> m01371m + m01619m	Arginine and proline metabolism	95.8044
HMR_8427_REVNo2	(reversible) (No2)	6.6613e-07 prot_P17540 + pmet_HMR_8427_REV -> m01285m + m01620m + m02039m	Arginine and proline metabolism	95.8044
HMR_1088No57	(No57)	pmet_HMR_1088 + 1.4172e-07 prot_P0C7U3 -> m01261c + m02369c	Leukotriene metabolism	93.1026
HMR_1088_REVNo57	(reversible) (No57)	7.215e-06 prot_P0C7U3 + pmet_HMR_1088_REV -> m01597c + m02039c + m02538c	Leukotriene metabolism	93.1026
HMR_1091No57	(No57)	1.4172e-07 prot_P0C7U3 + pmet_HMR_1091 -> m01261n + m02369n	Leukotriene metabolism	93.1026
HMR_1091_REVNo57	(reversible) (No57)	7.215e-06 prot_P0C7U3 + pmet_HMR_1091_REV -> m01597n + m02039n + m02538n	Leukotriene metabolism	93.1026
arm_HMR_1088	(arm)	m01597c + m02039c + m02538c -> pmet_HMR_1088	Leukotriene metabolism	93.1026
arm_HMR_1088_REV	(reversible) (arm)	m01261c + m02369c -> pmet_HMR_1088_REV	Leukotriene metabolism	93.1026
arm_HMR_1091	(arm)	m01597n + m02039n + m02538n -> pmet_HMR_1091	Leukotriene metabolism	93.1026
arm_HMR_1091_REV	(reversible) (arm)	m01261n + m02369n -> pmet_HMR_1091_REV	Leukotriene metabolism	93.1026
prot_Q6NUN0_exchange	prot_Q6NUN0_exchange	-> prot_Q6NUN0	Protein translation and secretion	92.0562
HMR_0730No5	(No5)	pmet_HMR_0730 + 1.634e-06 prot_Q5SGD2 -> m01430r	Transport reactions	88.4961
HMR_0730_REVNo5	(reversible) (No5)	1.634e-06 prot_Q5SGD2 + pmet_HMR_0730_REV -> m01430c	Transport reactions	88.4961
arm_HMR_0730	(arm)	m01430c -> pmet_HMR_0730	Transport reactions	88.4961
arm_HMR_0730_REV	(reversible) (arm)	m01430r -> pmet_HMR_0730_REV	Transport reactions	88.4961
prot_O94788_exchange	prot_O94788_exchange	-> prot_O94788	Protein translation and secretion	86.1672
HMR_5322		m02519s + m02770s -> m02519c + m02770c	Transport reactions	83.8756
HMR_4190No2	(No2)	1.177e-05 prot_P29475 + pmet_HMR_4190 -> m02040c + m02497c + m02554c	Arginine and proline metabolism	80.9759
HMR_4190_REVNo2	(reversible) (No2)	6.5669e-06 prot_P29475 + pmet_HMR_4190_REV -> m01365c + m02039c + m02555c + m02630c	Arginine and proline metabolism	80.9759
arm_HMR_4190	(arm)	m01365c + m02039c + m02555c + m02630c -> pmet_HMR_4190	Arginine and proline metabolism	80.9759
arm_HMR_4190_REV	(reversible) (arm)	m02040c + m02497c + m02554c -> pmet_HMR_4190_REV	Arginine and proline metabolism	80.9759
GLYNATmNo1	Glycine-N-Acetyltransferase (No1)	m01986m + m02721m + 8.6806e-05 prot_Q6IB77 -> m01597m + m02039m + pheacgly_m	Phenylalanine metabolism	80.8789
GLYNATm_REVNo1	Glycine-N-Acetyltransferase (reversible) (No1)	m01597m + m02039m + pheacgly_m + 1.8519e-05 prot_Q6IB77 -> m01986m + m02721m	Phenylalanine metabolism	80.8789
HMR_3743No1	(No1)	1.8519e-05 prot_Q6IB77 + pmet_HMR_3743 -> m01364m + m01986m	Phenylalanine, tyrosine and tryptophan biosynthesis	80.8789
HMR_3743_REVNo1	(reversible) (No1)	8.6806e-05 prot_Q6IB77 + pmet_HMR_3743_REV -> m01597m + m02039m + m02558m	Phenylalanine, tyrosine and tryptophan biosynthesis	80.8789
HMR_3750No1	(No1)	pmet_HMR_3750 + 1.8519e-05 prot_Q6IB77 -> m01986m + m02180m	Glycine, serine and threonine metabolism	80.8789
HMR_3750_REVNo1	(reversible) (No1)	8.6806e-05 prot_Q6IB77 + pmet_HMR_3750_REV -> m01597m + m02039m + m02181m	Glycine, serine and threonine metabolism	80.8789
HMR_3771No1	(No1)	1.8519e-05 prot_Q6IB77 + pmet_HMR_3771 -> m01986m + m02189m	Glycine, serine and threonine metabolism	80.8789
HMR_3771_REVNo1	(reversible) (No1)	8.6806e-05 prot_Q6IB77 + pmet_HMR_3771_REV -> m01597m + m02039m + m02190m	Glycine, serine and threonine metabolism	80.8789
HMR_3772No1	(No1)	1.8519e-05 prot_Q6IB77 + pmet_HMR_3772 -> m00826m + m01986m	Glycine, serine and threonine metabolism	80.8789
HMR_3772_REVNo1	(reversible) (No1)	8.6806e-05 prot_Q6IB77 + pmet_HMR_3772_REV -> m00825m + m01597m + m02039m	Glycine, serine and threonine metabolism	80.8789
HMR_3782No1	(No1)	8.6806e-05 prot_Q6IB77 + pmet_HMR_3782 -> m00664m + m01597m + m02039m	Glycine, serine and threonine metabolism	80.8789
HMR_3782_REVNo1	(reversible) (No1)	1.8519e-05 prot_Q6IB77 + pmet_HMR_3782_REV -> m00663m + m01986m	Glycine, serine and threonine metabolism	80.8789
PPIOGLYcNo1	Formation of Propionyl-Glycine (No1)	m01986m + m02774m + 8.6806e-05 prot_Q6IB77 -> m01597m + m02039m + ppiogly_m	Glycine, serine and threonine metabolism	80.8789
PPIOGLYc_REVNo1	Formation of Propionyl-Glycine (reversible) (No1)	m01597m + m02039m + ppiogly_m + 1.8519e-05 prot_Q6IB77 -> m01986m + m02774m	Glycine, serine and threonine metabolism	80.8789
TIGGLYcNo1	Formation of Tiglylglycine (No1)	m01986m + m02999m + 8.6806e-05 prot_Q6IB77 -> m01597m + m02039m + tiggly_m	Glycine, serine and threonine metabolism	80.8789
TIGGLYc_REVNo1	Formation of Tiglylglycine (reversible) (No1)	m01597m + m02039m + tiggly_m + 1.8519e-05 prot_Q6IB77 -> m01986m + m02999m	Glycine, serine and threonine metabolism	80.8789
arm_HMR_3743	(arm)	m01597m + m02039m + m02558m -> pmet_HMR_3743	Phenylalanine, tyrosine and tryptophan biosynthesis	80.8789
arm_HMR_3743_REV	(reversible) (arm)	m01364m + m01986m -> pmet_HMR_3743_REV	Phenylalanine, tyrosine and tryptophan biosynthesis	80.8789
arm_HMR_3750	(arm)	m01597m + m02039m + m02181m -> pmet_HMR_3750	Glycine, serine and threonine metabolism	80.8789
arm_HMR_3750_REV	(reversible) (arm)	m01986m + m02180m -> pmet_HMR_3750_REV	Glycine, serine and threonine metabolism	80.8789
arm_HMR_3771	(arm)	m01597m + m02039m + m02190m -> pmet_HMR_3771	Glycine, serine and threonine metabolism	80.8789
arm_HMR_3771_REV	(reversible) (arm)	m01986m + m02189m -> pmet_HMR_3771_REV	Glycine, serine and threonine metabolism	80.8789
arm_HMR_3772	(arm)	m00825m + m01597m + m02039m -> pmet_HMR_3772	Glycine, serine and threonine metabolism	80.8789
arm_HMR_3772_REV	(reversible) (arm)	m00826m + m01986m -> pmet_HMR_3772_REV	Glycine, serine and threonine metabolism	80.8789
arm_HMR_3782	(arm)	m00663m + m01986m -> pmet_HMR_3782	Glycine, serine and threonine metabolism	80.8789
arm_HMR_3782_REV	(reversible) (arm)	m00664m + m01597m + m02039m -> pmet_HMR_3782_REV	Glycine, serine and threonine metabolism	80.8789
HMR_1605No1	(No1)	m01078m + m02039m + m02555m + m02630m + 0.0038052 prot_Q02318 -> m01090m + m02040m + m02554m	Bile acid biosynthesis	73.3555
HMR_1790No1	(No1)	m00623m + m02554m + 0.0038052 prot_Q02318 -> m00763m + m02039m + m02555m	Bile acid biosynthesis	73.3555
HMR_1790_REVNo1	(reversible) (No1)	m00763m + m02039m + m02555m + 0.0038052 prot_Q02318 -> m00623m + m02554m	Bile acid biosynthesis	73.3555
HMR_1792No1	(No1)	m00763m + m02040m + m02554m + 0.0038052 prot_Q02318 -> m00764m + 2 m02039m + m02555m	Bile acid biosynthesis	73.3555
HMR_1792_REVNo1	(reversible) (No1)	m00764m + 2 m02039m + m02555m + 0.0038052 prot_Q02318 -> m00763m + m02040m + m02554m	Bile acid biosynthesis	73.3555
HMR_1802No2	(No2)	0.0038052 prot_Q02318 + pmet_HMR_1802 -> m01092m + m02040m + m02554m	Bile acid biosynthesis	73.3555
HMR_1802_REVNo2	(reversible) (No2)	0.0038052 prot_Q02318 + pmet_HMR_1802_REV -> m01078m + m02039m + m02555m + m02630m	Bile acid biosynthesis	73.3555
HMR_1803No1	(No1)	m00750c + m02039c + m02553c + 0.0038052 prot_Q02318 -> m01092c + m02552c	Bile acid biosynthesis	73.3555
HMR_1803_REVNo1	(reversible) (No1)	m01092c + m02552c + 0.0038052 prot_Q02318 -> m00750c + m02039c + m02553c	Bile acid biosynthesis	73.3555
HMR_1806No1	(No1)	m00751m + m02039m + m02553m + 0.0038052 prot_Q02318 -> m01092m + m02552m	Bile acid biosynthesis	73.3555
HMR_1806_REVNo1	(reversible) (No1)	m01092m + m02552m + 0.0038052 prot_Q02318 -> m00751m + m02039m + m02553m	Bile acid biosynthesis	73.3555
HMR_1807No1	(No1)	m00751m + m02040m + 0.0038052 prot_Q02318 -> m01091m	Bile acid biosynthesis	73.3555
HMR_1807_REVNo1	(reversible) (No1)	m01091m + 0.0038052 prot_Q02318 -> m00751m + m02040m	Bile acid biosynthesis	73.3555
RE1804MNo1	RE1804M (No1)	m01093m + m02552m + 0.0038052 prot_Q02318 -> m00756m + m02039m + m02553m	Bile acid biosynthesis	73.3555
RE1804M_REVNo1	RE1804M (reversible) (No1)	m00756m + m02039m + m02553m + 0.0038052 prot_Q02318 -> m01093m + m02552m	Bile acid biosynthesis	73.3555
RE1807MNo1	RE1807M (No1)	m00756m + m02040m + m02554m + 0.0038052 prot_Q02318 -> m00758m + 2 m02039m + m02555m	Bile acid biosynthesis	73.3555
RE1807M_REVNo1	RE1807M (reversible) (No1)	m00758m + 2 m02039m + m02555m + 0.0038052 prot_Q02318 -> m00756m + m02040m + m02554m	Bile acid biosynthesis	73.3555
RE2625MNo1	RE2625M (No1)	m01090m + m02552m + 0.0038052 prot_Q02318 -> m00751m + m02039m + m02553m	Bile acid biosynthesis	73.3555
RE2625M_REVNo1	RE2625M (reversible) (No1)	m00751m + m02039m + m02553m + 0.0038052 prot_Q02318 -> m01090m + m02552m	Bile acid biosynthesis	73.3555
RE2626MNo1	RE2626M (No1)	m00751m + m02040m + m02554m + 0.0038052 prot_Q02318 -> m00752m + 2 m02039m + m02555m	Bile acid biosynthesis	73.3555
RE2626M_REVNo1	RE2626M (reversible) (No1)	m00752m + 2 m02039m + m02555m + 0.0038052 prot_Q02318 -> m00751m + m02040m + m02554m	Bile acid biosynthesis	73.3555
arm_HMR_1802	(arm)	m01078m + m02039m + m02555m + m02630m -> pmet_HMR_1802	Bile acid biosynthesis	73.3555
arm_HMR_1802_REV	(reversible) (arm)	m01092m + m02040m + m02554m -> pmet_HMR_1802_REV	Bile acid biosynthesis	73.3555
NAHCO3_HCLt	Bicarbonate Transport (HCl/ (Hcl/NaHCO3 Exchange)	m01442c + m02039c + m02046s + m02519s -> m01442s + m02039s + m02046c + m02519c	Transport reactions	70.7637
NAHCO3_HCLt_REV	Bicarbonate Transport (HCl/ (Hcl/NaHCO3 Exchange) (reversible)	m01442s + m02039s + m02046c + m02519c -> m01442c + m02039c + m02046s + m02519s	Transport reactions	70.7637
HMR_9617		m01442s + m02519s + m02770s -> m01442c + m02519c + m02770c	Transport reactions	65.492
prot_P28845_exchange	prot_P28845_exchange	-> prot_P28845	Protein translation and secretion	63.8378
HMR_8861		m02040c + m03121c -> m02040s + m03121s	Transport reactions	62.9902
HMR_8861_REV	(reversible)	m02040s + m03121s -> m02040c + m03121c	Transport reactions	62.9902
HMR_8938		2 m02519s + m02770s -> 2 m02519c + m02770c	Transport reactions	62.9237
HMR_3920No2	(No2)	pmet_HMR_3920 + 2.2011e-08 prot_Q15166 -> m02039c + m02133c	Cysteine and methionine metabolism	62.4342
HMR_3920_REVNo2	(reversible) (No2)	2.2011e-08 prot_Q15166 + pmet_HMR_3920_REV -> m02040c + m02134c	Cysteine and methionine metabolism	62.4342
arm_HMR_3920	(arm)	m02040c + m02134c -> pmet_HMR_3920	Cysteine and methionine metabolism	62.4342
arm_HMR_3920_REV	(reversible) (arm)	m02039c + m02133c -> pmet_HMR_3920_REV	Cysteine and methionine metabolism	62.4342
HMR_5406No8	(No8)	6.6138e-11 prot_P07451 + pmet_HMR_5406 -> m01421c	Miscellaneous	60.5094
HMR_5406_REVNo8	(reversible) (No8)	6.6138e-11 prot_P07451 + pmet_HMR_5406_REV -> m01596c + m02040c	Miscellaneous	60.5094
HMR_5407No8	(No8)	pmet_HMR_5407 + 6.6138e-11 prot_P07451 -> m01421s	Miscellaneous	60.5094
HMR_5407_REVNo8	(reversible) (No8)	6.6138e-11 prot_P07451 + pmet_HMR_5407_REV -> m01596s + m02040s	Miscellaneous	60.5094
HMR_0991No7	(No7)	2.1701e-06 prot_P11511 + pmet_HMR_0991 -> m00390c	Arachidonic acid metabolism	56.7506
HMR_0991_REVNo7	(reversible) (No7)	2.1701e-06 prot_P11511 + pmet_HMR_0991_REV -> m00380c	Arachidonic acid metabolism	56.7506
HMR_0992No7	(No7)	2.1701e-06 prot_P11511 + pmet_HMR_0992 -> m00390c + m02040c	Arachidonic acid metabolism	56.7506
HMR_0992_REVNo7	(reversible) (No7)	2.1701e-06 prot_P11511 + pmet_HMR_0992_REV -> m00276c	Arachidonic acid metabolism	56.7506
HMR_0993No7	(No7)	2.1701e-06 prot_P11511 + pmet_HMR_0993 -> m00380c	Arachidonic acid metabolism	56.7506
HMR_0993_REVNo7	(reversible) (No7)	2.1701e-06 prot_P11511 + pmet_HMR_0993_REV -> m00296c	Arachidonic acid metabolism	56.7506
HMR_0994No7	(No7)	2.1701e-06 prot_P11511 + pmet_HMR_0994 -> m00296c + m02040c	Arachidonic acid metabolism	56.7506
HMR_0994_REVNo7	(reversible) (No7)	2.1701e-06 prot_P11511 + pmet_HMR_0994_REV -> m00280c	Arachidonic acid metabolism	56.7506
HMR_1149No7	(No7)	0.00010808 prot_P11511 + pmet_HMR_1149 -> m01152c + m02554c	Leukotriene metabolism	56.7506
HMR_1149_REVNo7	(reversible) (No7)	2.1701e-06 prot_P11511 + pmet_HMR_1149_REV -> m01124c + m02039c + m02555c	Leukotriene metabolism	56.7506
HMR_1150No7	(No7)	0.00010808 prot_P11511 + pmet_HMR_1150 -> m01152m + m02554m	Leukotriene metabolism	56.7506
HMR_1150_REVNo7	(reversible) (No7)	2.1701e-06 prot_P11511 + pmet_HMR_1150_REV -> m01124m + m02039m + m02555m	Leukotriene metabolism	56.7506
HMR_1151No7	(No7)	0.00010808 prot_P11511 + pmet_HMR_1151 -> m01152r + m02554r	Leukotriene metabolism	56.7506
HMR_1151_REVNo7	(reversible) (No7)	2.1701e-06 prot_P11511 + pmet_HMR_1151_REV -> m01124r + m02039r + m02555r	Leukotriene metabolism	56.7506
HMR_1152No7	(No7)	0.00010808 prot_P11511 + pmet_HMR_1152 -> m01152p + m02554p	Leukotriene metabolism	56.7506
HMR_1152_REVNo7	(reversible) (No7)	2.1701e-06 prot_P11511 + pmet_HMR_1152_REV -> m01124p + m02039p + m02555p	Leukotriene metabolism	56.7506
HMR_1153No7	(No7)	0.00010808 prot_P11511 + pmet_HMR_1153 -> m01153c + m02554c	Leukotriene metabolism	56.7506
HMR_1153_REVNo7	(reversible) (No7)	2.1701e-06 prot_P11511 + pmet_HMR_1153_REV -> m01152c + m02039c + m02555c	Leukotriene metabolism	56.7506
HMR_1154No7	(No7)	0.00010808 prot_P11511 + pmet_HMR_1154 -> m01153m + m02554m	Leukotriene metabolism	56.7506
HMR_1154_REVNo7	(reversible) (No7)	2.1701e-06 prot_P11511 + pmet_HMR_1154_REV -> m01152m + m02039m + m02555m	Leukotriene metabolism	56.7506
HMR_1155No7	(No7)	0.00010808 prot_P11511 + pmet_HMR_1155 -> m01153r + m02554r	Leukotriene metabolism	56.7506
HMR_1155_REVNo7	(reversible) (No7)	2.1701e-06 prot_P11511 + pmet_HMR_1155_REV -> m01152r + m02039r + m02555r	Leukotriene metabolism	56.7506
HMR_1156No7	(No7)	0.00010808 prot_P11511 + pmet_HMR_1156 -> m01153p + m02554p	Leukotriene metabolism	56.7506
HMR_1156_REVNo7	(reversible) (No7)	2.1701e-06 prot_P11511 + pmet_HMR_1156_REV -> m01152p + m02039p + m02555p	Leukotriene metabolism	56.7506
HMR_1193No7	(No7)	0.00010808 prot_P11511 + pmet_HMR_1193 -> m01151c + m02554c	Leukotriene metabolism	56.7506
HMR_1193_REVNo7	(reversible) (No7)	2.1701e-06 prot_P11511 + pmet_HMR_1193_REV -> m01118c + m02039c + m02555c	Leukotriene metabolism	56.7506
HMR_1194No7	(No7)	0.00010808 prot_P11511 + pmet_HMR_1194 -> m01151m + m02554m	Leukotriene metabolism	56.7506
HMR_1194_REVNo7	(reversible) (No7)	2.1701e-06 prot_P11511 + pmet_HMR_1194_REV -> m01118m + m02039m + m02555m	Leukotriene metabolism	56.7506
HMR_1195No7	(No7)	0.00010808 prot_P11511 + pmet_HMR_1195 -> m01151r + m02554r	Leukotriene metabolism	56.7506
HMR_1195_REVNo7	(reversible) (No7)	2.1701e-06 prot_P11511 + pmet_HMR_1195_REV -> m01118r + m02039r + m02555r	Leukotriene metabolism	56.7506
HMR_1196No7	(No7)	0.00010808 prot_P11511 + pmet_HMR_1196 -> m01151p + m02554p	Leukotriene metabolism	56.7506
HMR_1196_REVNo7	(reversible) (No7)	2.1701e-06 prot_P11511 + pmet_HMR_1196_REV -> m01118p + m02039p + m02555p	Leukotriene metabolism	56.7506
HMR_5310		m01975s + m02039c + 2 m02519s -> m01975c + m02039s + 2 m02519c	Transport reactions	55.9714
HMR_1098No13	(No13)	1.1067e-06 prot_Q8NEX9 + pmet_HMR_1098 -> m00394c + m02039c + m02555c	Leukotriene metabolism	54.4243
HMR_1098_REVNo13	(reversible) (No13)	1.5518e-06 prot_Q8NEX9 + pmet_HMR_1098_REV -> m00339c + m02554c	Leukotriene metabolism	54.4243
HMR_1813No13	(No13)	1.5518e-06 prot_Q8NEX9 + pmet_HMR_1813 -> m01087r + m02554r	Bile acid biosynthesis	54.4243
HMR_1813_REVNo13	(reversible) (No13)	1.1067e-06 prot_Q8NEX9 + pmet_HMR_1813_REV -> m00747r + m02039r + m02555r	Bile acid biosynthesis	54.4243
HMR_6670No13	(No13)	1.5518e-06 prot_Q8NEX9 + pmet_HMR_6670 -> m01229c + m02554c	Retinol metabolism	54.4243
HMR_6670_REVNo13	(reversible) (No13)	1.1067e-06 prot_Q8NEX9 + pmet_HMR_6670_REV -> m01029c + m02039c + m02555c	Retinol metabolism	54.4243
HMR_6925No13	(No13)	5.4466e-07 prot_Q8NEX9 + pmet_HMR_6925 -> m01325c + m02552c	Valine, leucine, and isoleucine metabolism	54.4243
HMR_6925_REVNo13	(reversible) (No13)	1.5288e-07 prot_Q8NEX9 + pmet_HMR_6925_REV -> m01013c + m02039c + m02553c	Valine, leucine, and isoleucine metabolism	54.4243
HMR_9804No13	(No13)	pmet_HMR_9804 + 1.1067e-06 prot_Q8NEX9 -> m02039m + m02555m + m03168m	Propanoate metabolism	54.4243
HMR_9804_REVNo13	(reversible) (No13)	1.5518e-06 prot_Q8NEX9 + pmet_HMR_9804_REV -> m00799m + m02554m	Propanoate metabolism	54.4243
HMR_5313		m01369s + m02039c + 2 m02519s -> m01369c + m02039s + 2 m02519c	Transport reactions	53.6923
HMR_6532		2 m01442s + m02046c -> 2 m01442c + m02046s	Transport reactions	53.63
HMR_4549No8	(No8)	7.0146e-10 prot_Q9H3R1 + pmet_HMR_4549 -> m01161c + m02949c	Serotonin and melatonin biosynthesis	52.3862
HMR_4549_REVNo8	(reversible) (No8)	7.0146e-10 prot_Q9H3R1 + pmet_HMR_4549_REV -> m01162c + m02039c	Serotonin and melatonin biosynthesis	52.3862
prot_Q9HB55_exchange	prot_Q9HB55_exchange	-> prot_Q9HB55	Protein translation and secretion	48.6014
HMR_5335		m02039c + m02125s + 2 m02519s -> m02039s + m02125c + 2 m02519c	Transport reactions	43.474
prot_Q8IZP7_exchange	prot_Q8IZP7_exchange	-> prot_Q8IZP7	Protein translation and secretion	42.4378
HMR_1088No47	(No47)	pmet_HMR_1088 + 1.4172e-07 prot_Q96T53 -> m01261c + m02369c	Leukotriene metabolism	41.8657
HMR_1088_REVNo47	(reversible) (No47)	7.215e-06 prot_Q96T53 + pmet_HMR_1088_REV -> m01597c + m02039c + m02538c	Leukotriene metabolism	41.8657
HMR_1091No47	(No47)	1.4172e-07 prot_Q96T53 + pmet_HMR_1091 -> m01261n + m02369n	Leukotriene metabolism	41.8657
HMR_1091_REVNo47	(reversible) (No47)	7.215e-06 prot_Q96T53 + pmet_HMR_1091_REV -> m01597n + m02039n + m02538n	Leukotriene metabolism	41.8657
HMR_4257No2	(No2)	pmet_HMR_4257 + 5.1536e-06 prot_Q96T66 -> m01646c + m02759c	Nicotinate and nicotinamide metabolism	41.0953
HMR_4257_REVNo2	(reversible) (No2)	2.8345e-06 prot_Q96T66 + pmet_HMR_4257_REV -> m01371c + m02039c + m02585c	Nicotinate and nicotinamide metabolism	41.0953
arm_HMR_4257	(arm)	m01371c + m02039c + m02585c -> pmet_HMR_4257	Nicotinate and nicotinamide metabolism	41.0953
arm_HMR_4257_REV	(reversible) (arm)	m01646c + m02759c -> pmet_HMR_4257_REV	Nicotinate and nicotinamide metabolism	41.0953
HMR_4363No2	(No2)	pmet_HMR_4363 + 3.4008e-06 prot_P13929 -> m02040c + m02696c	Glycolysis / Gluconeogenesis	38.3746
HMR_4363_REVNo2	(reversible) (No2)	3.4008e-06 prot_P13929 + pmet_HMR_4363_REV -> m00674c	Glycolysis / Gluconeogenesis	38.3746
arm_HMR_4363	(arm)	m00674c -> pmet_HMR_4363	Glycolysis / Gluconeogenesis	38.3746
arm_HMR_4363_REV	(reversible) (arm)	m02040c + m02696c -> pmet_HMR_4363_REV	Glycolysis / Gluconeogenesis	38.3746
prot_Q02318_exchange	prot_Q02318_exchange	-> prot_Q02318	Protein translation and secretion	37.5476
HMR_4582No1	(No1)	m01365c + m01986c + 5.3522e-06 prot_P50440 -> m02036c + m02658c	Glycine, serine and threonine metabolism	36.201
HMR_4582_REVNo1	(reversible) (No1)	m02036c + m02658c + 1.4854e-06 prot_P50440 -> m01365c + m01986c	Glycine, serine and threonine metabolism	36.201
prot_Q6IB77_exchange	prot_Q6IB77_exchange	-> prot_Q6IB77	Protein translation and secretion	33.4441
HMR_6671No1	(No1)	1.4172e-07 prot_Q96PD7 + pmet_HMR_6671 -> m00292c + m01597c	Retinol metabolism	31.8871
HMR_6671_REVNo1	(reversible) (No1)	1.4172e-07 prot_Q96PD7 + pmet_HMR_6671_REV -> m00291c + m02678c	Retinol metabolism	31.8871
arm_HMR_6671	(arm)	m00291c + m02678c -> pmet_HMR_6671	Retinol metabolism	31.8871
arm_HMR_6671_REV	(reversible) (arm)	m00292c + m01597c -> pmet_HMR_6671_REV	Retinol metabolism	31.8871
prot_P41222_exchange	prot_P41222_exchange	-> prot_P41222	Protein translation and secretion	30.8544
HMR_4477No2	(No2)	pmet_HMR_4477 + 2.3148e-08 prot_Q2QD12 -> m02846c	Pentose phosphate pathway	30.8374
HMR_4477_REVNo2	(reversible) (No2)	2.3148e-08 prot_Q2QD12 + pmet_HMR_4477_REV -> m01761c	Pentose phosphate pathway	30.8374
arm_HMR_4477	(arm)	m01761c -> pmet_HMR_4477	Pentose phosphate pathway	30.8374
arm_HMR_4477_REV	(reversible) (arm)	m02846c -> pmet_HMR_4477_REV	Pentose phosphate pathway	30.8374
HMR_1685No1	(No1)	m01093m + m02554m + 0.0038052 prot_Q02318 -> m00756m + m02039m + m02555m	Bile acid biosynthesis	30.5749
HMR_0991No4	(No4)	2.1701e-06 prot_P33260 + pmet_HMR_0991 -> m00390c	Arachidonic acid metabolism	29.6041
HMR_0991_REVNo4	(reversible) (No4)	2.1701e-06 prot_P33260 + pmet_HMR_0991_REV -> m00380c	Arachidonic acid metabolism	29.6041
HMR_0992No4	(No4)	2.1701e-06 prot_P33260 + pmet_HMR_0992 -> m00390c + m02040c	Arachidonic acid metabolism	29.6041
HMR_0992_REVNo4	(reversible) (No4)	2.1701e-06 prot_P33260 + pmet_HMR_0992_REV -> m00276c	Arachidonic acid metabolism	29.6041
HMR_0993No4	(No4)	2.1701e-06 prot_P33260 + pmet_HMR_0993 -> m00380c	Arachidonic acid metabolism	29.6041
HMR_0993_REVNo4	(reversible) (No4)	2.1701e-06 prot_P33260 + pmet_HMR_0993_REV -> m00296c	Arachidonic acid metabolism	29.6041
HMR_0994No4	(No4)	2.1701e-06 prot_P33260 + pmet_HMR_0994 -> m00296c + m02040c	Arachidonic acid metabolism	29.6041
HMR_0994_REVNo4	(reversible) (No4)	2.1701e-06 prot_P33260 + pmet_HMR_0994_REV -> m00280c	Arachidonic acid metabolism	29.6041
HMR_1149No4	(No4)	0.00010808 prot_P33260 + pmet_HMR_1149 -> m01152c + m02554c	Leukotriene metabolism	29.6041
HMR_1149_REVNo4	(reversible) (No4)	2.1701e-06 prot_P33260 + pmet_HMR_1149_REV -> m01124c + m02039c + m02555c	Leukotriene metabolism	29.6041
HMR_1150No4	(No4)	0.00010808 prot_P33260 + pmet_HMR_1150 -> m01152m + m02554m	Leukotriene metabolism	29.6041
HMR_1150_REVNo4	(reversible) (No4)	2.1701e-06 prot_P33260 + pmet_HMR_1150_REV -> m01124m + m02039m + m02555m	Leukotriene metabolism	29.6041
HMR_1151No4	(No4)	0.00010808 prot_P33260 + pmet_HMR_1151 -> m01152r + m02554r	Leukotriene metabolism	29.6041
HMR_1151_REVNo4	(reversible) (No4)	2.1701e-06 prot_P33260 + pmet_HMR_1151_REV -> m01124r + m02039r + m02555r	Leukotriene metabolism	29.6041
HMR_1152No4	(No4)	0.00010808 prot_P33260 + pmet_HMR_1152 -> m01152p + m02554p	Leukotriene metabolism	29.6041
HMR_1152_REVNo4	(reversible) (No4)	2.1701e-06 prot_P33260 + pmet_HMR_1152_REV -> m01124p + m02039p + m02555p	Leukotriene metabolism	29.6041
HMR_1153No4	(No4)	0.00010808 prot_P33260 + pmet_HMR_1153 -> m01153c + m02554c	Leukotriene metabolism	29.6041
HMR_1153_REVNo4	(reversible) (No4)	2.1701e-06 prot_P33260 + pmet_HMR_1153_REV -> m01152c + m02039c + m02555c	Leukotriene metabolism	29.6041
HMR_1154No4	(No4)	0.00010808 prot_P33260 + pmet_HMR_1154 -> m01153m + m02554m	Leukotriene metabolism	29.6041
HMR_1154_REVNo4	(reversible) (No4)	2.1701e-06 prot_P33260 + pmet_HMR_1154_REV -> m01152m + m02039m + m02555m	Leukotriene metabolism	29.6041
HMR_1155No4	(No4)	0.00010808 prot_P33260 + pmet_HMR_1155 -> m01153r + m02554r	Leukotriene metabolism	29.6041
HMR_1155_REVNo4	(reversible) (No4)	2.1701e-06 prot_P33260 + pmet_HMR_1155_REV -> m01152r + m02039r + m02555r	Leukotriene metabolism	29.6041
HMR_1156No4	(No4)	0.00010808 prot_P33260 + pmet_HMR_1156 -> m01153p + m02554p	Leukotriene metabolism	29.6041
HMR_1156_REVNo4	(reversible) (No4)	2.1701e-06 prot_P33260 + pmet_HMR_1156_REV -> m01152p + m02039p + m02555p	Leukotriene metabolism	29.6041
HMR_1193No4	(No4)	0.00010808 prot_P33260 + pmet_HMR_1193 -> m01151c + m02554c	Leukotriene metabolism	29.6041
HMR_1193_REVNo4	(reversible) (No4)	2.1701e-06 prot_P33260 + pmet_HMR_1193_REV -> m01118c + m02039c + m02555c	Leukotriene metabolism	29.6041
HMR_1194No4	(No4)	0.00010808 prot_P33260 + pmet_HMR_1194 -> m01151m + m02554m	Leukotriene metabolism	29.6041
HMR_1194_REVNo4	(reversible) (No4)	2.1701e-06 prot_P33260 + pmet_HMR_1194_REV -> m01118m + m02039m + m02555m	Leukotriene metabolism	29.6041
HMR_1195No4	(No4)	0.00010808 prot_P33260 + pmet_HMR_1195 -> m01151r + m02554r	Leukotriene metabolism	29.6041
HMR_1195_REVNo4	(reversible) (No4)	2.1701e-06 prot_P33260 + pmet_HMR_1195_REV -> m01118r + m02039r + m02555r	Leukotriene metabolism	29.6041
HMR_1196No4	(No4)	0.00010808 prot_P33260 + pmet_HMR_1196 -> m01151p + m02554p	Leukotriene metabolism	29.6041
HMR_1196_REVNo4	(reversible) (No4)	2.1701e-06 prot_P33260 + pmet_HMR_1196_REV -> m01118p + m02039p + m02555p	Leukotriene metabolism	29.6041
HMR_4579No1	(No1)	pmet_HMR_4579 + 2.5253e-06 prot_O95045 -> m02844c + m03118c	Pyrimidine metabolism	29.6041
HMR_4579_REVNo1	(reversible) (No1)	2.5253e-06 prot_O95045 + pmet_HMR_4579_REV -> m02751c + m03123c	Pyrimidine metabolism	29.6041
HMR_4680No1	(No1)	2.5253e-06 prot_O95045 + pmet_HMR_4680 -> m01673c + m02751c	Nucleotide metabolism	29.6041
HMR_4680_REVNo1	(reversible) (No1)	2.5253e-06 prot_O95045 + pmet_HMR_4680_REV -> m00639c + m03118c	Nucleotide metabolism	29.6041
HMR_7019No3	(No3)	0.00010808 prot_P33260 + pmet_HMR_7019 -> m01301c + m02040c + m02554c	Xenobiotics metabolism	29.6041
HMR_7019_REVNo3	(reversible) (No3)	2.1701e-06 prot_P33260 + pmet_HMR_7019_REV -> m01300c + m02039c + m02555c + m02630c	Xenobiotics metabolism	29.6041
HMR_7048No3	(No3)	0.00010808 prot_P33260 + pmet_HMR_7048 -> m01405c + m02040c + m02554c	Xenobiotics metabolism	29.6041
HMR_7048_REVNo3	(reversible) (No3)	2.1701e-06 prot_P33260 + pmet_HMR_7048_REV -> m01403c + m02039c + m02555c + m02630c	Xenobiotics metabolism	29.6041
arm_HMR_4579	(arm)	m02751c + m03123c -> pmet_HMR_4579	Pyrimidine metabolism	29.6041
arm_HMR_4579_REV	(reversible) (arm)	m02844c + m03118c -> pmet_HMR_4579_REV	Pyrimidine metabolism	29.6041
arm_HMR_4680	(arm)	m00639c + m03118c -> pmet_HMR_4680	Nucleotide metabolism	29.6041
arm_HMR_4680_REV	(reversible) (arm)	m01673c + m02751c -> pmet_HMR_4680_REV	Nucleotide metabolism	29.6041
HMR_1010No1	(No1)	m00365c + 6.0386e-06 prot_P18054 -> m00380c	Arachidonic acid metabolism	29.0399
HMR_1010_REVNo1	(reversible) (No1)	m00380c + 6.0386e-06 prot_P18054 -> m00365c	Arachidonic acid metabolism	29.0399
HMR_1011No1	(No1)	m00365n + 6.0386e-06 prot_P18054 -> m00380n	Arachidonic acid metabolism	29.0399
HMR_1011_REVNo1	(reversible) (No1)	m00380n + 6.0386e-06 prot_P18054 -> m00365n	Arachidonic acid metabolism	29.0399
HMR_1093No2	(No2)	6.0386e-06 prot_P18054 + pmet_HMR_1093 -> m02039c + m02362c + m02555c + m02630c	Leukotriene metabolism	29.0399
HMR_1093_REVNo2	(reversible) (No2)	2.1204e-05 prot_P18054 + pmet_HMR_1093_REV -> m01058c + m02040c + m02554c	Leukotriene metabolism	29.0399
HMR_4549No13	(No13)	0.00053419 prot_Q9H3Q3 + pmet_HMR_4549 -> m01161c + m02949c	Serotonin and melatonin biosynthesis	29.0399
HMR_4549_REVNo13	(reversible) (No13)	0.00053419 prot_Q9H3Q3 + pmet_HMR_4549_REV -> m01162c + m02039c	Serotonin and melatonin biosynthesis	29.0399
arm_HMR_1093	(arm)	m01058c + m02040c + m02554c -> pmet_HMR_1093	Leukotriene metabolism	29.0399
arm_HMR_1093_REV	(reversible) (arm)	m02039c + m02362c + m02555c + m02630c -> pmet_HMR_1093_REV	Leukotriene metabolism	29.0399
HMR_5068		m01365s -> m01365c	Transport reactions	28.9122
HMR_5070		m02125c -> m02125s	Transport reactions	28.9122
HMR_5070_REV	(reversible)	m02125s -> m02125c	Transport reactions	28.9122
HMR_5073		m02471c -> m02471s	Transport reactions	28.9122
HMR_5074		m03101c -> m03101s	Transport reactions	28.9122
HMR_5074_REV	(reversible)	m03101s -> m03101c	Transport reactions	28.9122
HMR_5076		m01986s -> m01986c	Transport reactions	28.9122
HMR_5078		m01975c -> m01975s	Transport reactions	28.9122
HMR_5078_REV	(reversible)	m01975s -> m01975c	Transport reactions	28.9122
HMR_5080		m03089c -> m03089s	Transport reactions	28.9122
HMR_5080_REV	(reversible)	m03089s -> m03089c	Transport reactions	28.9122
HMR_5082		m02724c -> m02724s	Transport reactions	28.9122
HMR_5082_REV	(reversible)	m02724s -> m02724c	Transport reactions	28.9122
HMR_5084		m01628s -> m01628c	Transport reactions	28.9122
HMR_5085		m02360c -> m02360s	Transport reactions	28.9122
HMR_5085_REV	(reversible)	m02360s -> m02360c	Transport reactions	28.9122
HMR_5087		m02770c -> m02770s	Transport reactions	28.9122
HMR_5088		m01369s -> m01369c	Transport reactions	28.9122
HMR_5089		m03135c -> m03135s	Transport reactions	28.9122
HMR_5089_REV	(reversible)	m03135s -> m03135c	Transport reactions	28.9122
HMR_5091		m02993s -> m02993c	Transport reactions	28.9122
HMR_5092		m02184c -> m02184s	Transport reactions	28.9122
HMR_5092_REV	(reversible)	m02184s -> m02184c	Transport reactions	28.9122
HMR_5315		m02360s + m02519s -> m02360c + m02519c	Transport reactions	28.9122
HMR_5319		m02519s + m02724s -> m02519c + m02724c	Transport reactions	28.9122
HMR_6379		m02136s + m02519s -> m02136c + m02519c	Transport reactions	28.9122
HMR_6383		m02039c + m02136s + m02519s -> m02039s + m02136c + m02519c	Transport reactions	28.9122
HMR_5077		m01307s -> m01307c	Transport reactions	28.0557
HMR_5305		m01307s + m02519s -> m01307c + m02519c	Transport reactions	28.0557
HMR_5307		m01307s + m02039c + 2 m02519s -> m01307c + m02039s + 2 m02519c	Transport reactions	28.0557
HMR_5079		m02896s -> m02896c	Transport reactions	27.6988
HMR_5450		m01965s + m02519s -> m01965c + m02519c	Transport reactions	26.6679
HMR_8081		m02354c -> m02354s	Transport reactions	26.0359
HMR_8081_REV	(reversible)	m02354s -> m02354c	Transport reactions	26.0359
HMR_5071		m02426s -> m02426c	Transport reactions	25.4006
HMR_5308		m01975s + m02519s -> m01975c + m02519c	Transport reactions	25.0682
HMR_5311		m01369s + m02519s -> m01369c + m02519c	Transport reactions	25.0682
HMR_5314		m02519s + m03135s -> m02519c + m03135c	Transport reactions	25.0682
HMR_5316		m02184s + m02519s -> m02184c + m02519c	Transport reactions	25.0682
HMR_5324		m02471s + m02519s -> m02471c + m02519c	Transport reactions	25.0682
HMR_5326		m02519s + m02993s -> m02519c + m02993c	Transport reactions	25.0682
HMR_6375		m02519s + m02896s -> m02519c + m02896c	Transport reactions	25.0682
HMR_6377		m01628s + m02519s -> m01628c + m02519c	Transport reactions	25.0682
HMR_4002No4	(No4)	pmet_HMR_4002 + 7.0952e-07 prot_Q96M32 -> m01334c + m01371c	Purine metabolism	24.5383
HMR_4002_REVNo4	(reversible) (No4)	3.1584e-07 prot_Q96M32 + pmet_HMR_4002_REV -> 2 m01285c	Purine metabolism	24.5383
HMR_4004No4	(No4)	7.0952e-07 prot_Q96M32 + pmet_HMR_4004 -> m01334m + m01371m	Purine metabolism	24.5383
HMR_4004_REVNo4	(reversible) (No4)	3.1584e-07 prot_Q96M32 + pmet_HMR_4004_REV -> 2 m01285m	Purine metabolism	24.5383
HMR_4480No7	(No7)	3.5476e-07 prot_Q96M32 + pmet_HMR_4480 -> m01371c + m01639c	Purine metabolism	24.5383
HMR_4480_REVNo7	(reversible) (No7)	3.1584e-07 prot_Q96M32 + pmet_HMR_4480_REV -> m01285c + m01637c	Purine metabolism	24.5383
arm_HMR_4002	(arm)	2 m01285c -> pmet_HMR_4002	Purine metabolism	24.5383
arm_HMR_4002_REV	(reversible) (arm)	m01334c + m01371c -> pmet_HMR_4002_REV	Purine metabolism	24.5383
arm_HMR_4004	(arm)	2 m01285m -> pmet_HMR_4004	Purine metabolism	24.5383
arm_HMR_4004_REV	(reversible) (arm)	m01334m + m01371m -> pmet_HMR_4004_REV	Purine metabolism	24.5383
arm_HMR_4480	(arm)	m01285c + m01637c -> pmet_HMR_4480	Purine metabolism	24.5383
arm_HMR_4480_REV	(reversible) (arm)	m01371c + m01639c -> pmet_HMR_4480_REV	Purine metabolism	24.5383
RE2915MNo1	RE2915M (No1)	0.00012346 prot_P28330 + pmet_RE2915M -> m00099m + m01802m	Fatty acid oxidation	24.2085
RE2915M_REVNo1	RE2915M (reversible) (No1)	0.00012346 prot_P28330 + pmet_RE2915M_REV -> m01803m + CE2596_m	Fatty acid oxidation	24.2085
arm_RE2915M	RE2915M (arm)	m01803m + CE2596_m -> pmet_RE2915M	Fatty acid oxidation	24.2085
arm_RE2915M_REV	RE2915M (reversible) (arm)	m00099m + m01802m -> pmet_RE2915M_REV	Fatty acid oxidation	24.2085
HMR_4556No1	(No1)	m02604c + m02877c + 7.5689e-05 prot_O95050 -> m01408c + 2 m02039c + m02871c	Serotonin and melatonin biosynthesis	24.0376
HMR_4556_REVNo1	(reversible) (No1)	m01408c + 2 m02039c + m02871c + 7.5689e-05 prot_O95050 -> m02604c + m02877c	Serotonin and melatonin biosynthesis	24.0376
prot_P11511_exchange	prot_P11511_exchange	-> prot_P11511	Protein translation and secretion	22.4467
HMR_0915No1	(No1)	m02682c + m02810c + 0.00053419 prot_Q99999 -> m02039c + m02681c + m02809c	Glycosphingolipid metabolism	21.3236
HMR_0915_REVNo1	(reversible) (No1)	m02039c + m02681c + m02809c + 0.00053419 prot_Q99999 -> m02682c + m02810c	Glycosphingolipid metabolism	21.3236
HMR_0928No1	(No1)	m02328c + m02682c + 0.00053419 prot_Q99999 -> m02334c + m02681c	Glycosphingolipid biosynthesis-ganglio series	21.3236
HMR_0928_REVNo1	(reversible) (No1)	m02334c + m02681c + 0.00053419 prot_Q99999 -> m02328c + m02682c	Glycosphingolipid biosynthesis-ganglio series	21.3236
HMR_3809No1	(No1)	m01588m + m02039m + m02751m + 1.4854e-06 prot_P00480 -> m01420m + m02658m	Arginine and proline metabolism	21.2156
HMR_3809_REVNo1	(reversible) (No1)	m01420m + m02658m + 1.4854e-06 prot_P00480 -> m01588m + m02039m + m02751m	Arginine and proline metabolism	21.2156
HMR_5330		m01974s + m02519s -> m01974c + m02519c	Transport reactions	21.1924
HMR_0156No1	(No1)	pmet_HMR_0156 + 4.6296e-05 prot_Q53FZ2 -> m01371c + m01410c + m01597c	Fatty acid activation (cytosolic)	19.9671
HMR_0156_REVNo1	(reversible) (No1)	4.6296e-05 prot_Q53FZ2 + pmet_HMR_0156_REV -> m01334c + m01412c + m02759c	Fatty acid activation (cytosolic)	19.9671
HMR_0165No1	(No1)	4.6296e-05 prot_Q53FZ2 + pmet_HMR_0165 -> m01371c + m01597c + m03134c	Fatty acid activation (cytosolic)	19.9671
HMR_0165_REVNo1	(reversible) (No1)	4.6296e-05 prot_Q53FZ2 + pmet_HMR_0165_REV -> m01334c + m02694c + m02759c	Fatty acid activation (cytosolic)	19.9671
HMR_0168No1	(No1)	4.6296e-05 prot_Q53FZ2 + pmet_HMR_0168 -> m01371c + m01597c + m02120c	Fatty acid activation (cytosolic)	19.9671
HMR_0168_REVNo1	(reversible) (No1)	4.6296e-05 prot_Q53FZ2 + pmet_HMR_0168_REV -> m01334c + m02122c + m02759c	Fatty acid activation (cytosolic)	19.9671
HMR_0171No1	(No1)	4.6296e-05 prot_Q53FZ2 + pmet_HMR_0171 -> m01371c + m01597c + m02108c	Fatty acid activation (cytosolic)	19.9671
HMR_0171_REVNo1	(reversible) (No1)	4.6296e-05 prot_Q53FZ2 + pmet_HMR_0171_REV -> m01334c + m02107c + m02759c	Fatty acid activation (cytosolic)	19.9671
HMR_0174No1	(No1)	4.6296e-05 prot_Q53FZ2 + pmet_HMR_0174 -> m01371c + m01597c + m02642c	Fatty acid activation (cytosolic)	19.9671
HMR_0174_REVNo1	(reversible) (No1)	4.6296e-05 prot_Q53FZ2 + pmet_HMR_0174_REV -> m01334c + m02644c + m02759c	Fatty acid activation (cytosolic)	19.9671
HMR_0177No1	(No1)	4.6296e-05 prot_Q53FZ2 + pmet_HMR_0177 -> m01371c + m01597c + m02614c	Fatty acid activation (cytosolic)	19.9671
HMR_0177_REVNo1	(reversible) (No1)	4.6296e-05 prot_Q53FZ2 + pmet_HMR_0177_REV -> m01334c + m02616c + m02759c	Fatty acid activation (cytosolic)	19.9671
HMR_0180No1	(No1)	4.6296e-05 prot_Q53FZ2 + pmet_HMR_0180 -> m01371c + m01597c + m01648c	Fatty acid activation (cytosolic)	19.9671
HMR_0180_REVNo1	(reversible) (No1)	4.6296e-05 prot_Q53FZ2 + pmet_HMR_0180_REV -> m01334c + m01650c + m02759c	Fatty acid activation (cytosolic)	19.9671
HMR_0184No1	(No1)	4.6296e-05 prot_Q53FZ2 + pmet_HMR_0184 -> m01371c + m01597c + m03117c	Fatty acid activation (cytosolic)	19.9671
HMR_0184_REVNo1	(reversible) (No1)	4.6296e-05 prot_Q53FZ2 + pmet_HMR_0184_REV -> m01334c + m02759c + m03116c	Fatty acid activation (cytosolic)	19.9671
HMR_4845		m01280s + m02519s -> m01280c + m02519c	Transport reactions	16.6754
HMR_4427No2	(No2)	2.0129e-06 prot_Q96KN2 + pmet_HMR_4427 -> m01383c + m02125c	Beta-alanine metabolism	15.9323
arm_HMR_4427	(arm)	m01423c + m02040c -> pmet_HMR_4427	Beta-alanine metabolism	15.9323
HMR_5094		m02658s -> m02658c	Transport reactions	15.707
HMR_5038		m01630s + m02519s -> m01630c + m02519c	Transport reactions	15.466
HMR_5990		m01442c + m02200c -> m01442s + m02200s	Transport reactions	15.2779
HMR_5433		m02200c -> m02200s	Transport reactions	15.2779
HMR_4932		m01974s + m02039s + m02200c + 3 m02519s -> m01974c + m02039c + m02200s + 3 m02519c	Transport reactions	15.1002
HMR_4014No9	(No9)	pmet_HMR_4014 + 4.8991e-07 prot_Q01064 -> m01334c + m02039c	Purine metabolism	15.0998
HMR_4014No24	(No24)	pmet_HMR_4014 + 4.8991e-07 prot_O00408 -> m01334c + m02039c	Purine metabolism	15.0998
arm_HMR_4014	(arm)	m01419c + m02040c -> pmet_HMR_4014	Purine metabolism	15.0998
HMR_4014No16	(No16)	pmet_HMR_4014 + 4.8991e-07 prot_Q13370 -> m01334c + m02039c	Purine metabolism	15.0998
HMR_4425No1	(No1)	m01371c + m01383c + m02125c + 0.00049603 prot_A5YM72 -> m01334c + m01423c + m02039c + m02759c	Beta-alanine metabolism	15.0998
HMR_4000No2	(No2)	pmet_HMR_4000 + 9.6787e-06 prot_P25092 -> m01419c + m02759c	Purine metabolism	15.0998
HMR_4000No3	(No3)	pmet_HMR_4000 + 8.1699e-06 prot_Q08462 -> m01419c + m02759c	Purine metabolism	15.0998
arm_HMR_4000	(arm)	m01371c -> pmet_HMR_4000	Purine metabolism	15.0998
HMR_4000No1	(No1)	pmet_HMR_4000 + 9.6787e-06 prot_Q02108 + 9.6787e-06 prot_Q02153 -> m01419c + m02759c	Purine metabolism	15.0998
HMR_4606No1	(No1)	m00970c + m01371c + m02125c + 0.00049603 prot_A5YM72 -> m01334c + 2 m02039c + m02132c + m02759c	Arginine and proline metabolism	15.0998
HMR_4607No2	(No2)	pmet_HMR_4607 + 1.5432e-05 prot_Q96KN2 -> m00970c + m02125c	Arginine and proline metabolism	15.0998
arm_HMR_4607	(arm)	m02039c + m02040c + m02132c -> pmet_HMR_4607	Arginine and proline metabolism	15.0998
HMR_4000No11	(No11)	pmet_HMR_4000 + 8.1699e-06 prot_P40145 -> m01419c + m02759c	Purine metabolism	15.0998
HMR_1392No2	(No2)	0.041646 prot_P23219 + pmet_HMR_1392 -> m02040r + m02793c	Transport reactions	14.8589
HMR_1392_REVNo2	(reversible) (No2)	0.041646 prot_P23219 + pmet_HMR_1392_REV -> 2 m02039c + m02791c	Transport reactions	14.8589
HMR_1393No2	(No2)	0.041646 prot_P23219 + pmet_HMR_1393 -> m02040r + m02793r	Prostaglandin biosynthesis	14.8589
HMR_1393_REVNo2	(reversible) (No2)	0.041646 prot_P23219 + pmet_HMR_1393_REV -> 2 m02039r + m02791r	Prostaglandin biosynthesis	14.8589
HMR_2438No2	(No2)	pmet_HMR_2438 + 0.041646 prot_P23219 -> m01243c + m02040c + m02554c	Linoleate metabolism	14.8589
HMR_2438_REVNo2	(reversible) (No2)	0.041646 prot_P23219 + pmet_HMR_2438_REV -> m01217c + m02039c + m02555c	Linoleate metabolism	14.8589
arm_HMR_1392	(arm)	2 m02039c + m02791c -> pmet_HMR_1392	Transport reactions	14.8589
arm_HMR_1392_REV	(reversible) (arm)	m02040r + m02793c -> pmet_HMR_1392_REV	Transport reactions	14.8589
arm_HMR_1393	(arm)	2 m02039r + m02791r -> pmet_HMR_1393	Prostaglandin biosynthesis	14.8589
arm_HMR_1393_REV	(reversible) (arm)	m02040r + m02793r -> pmet_HMR_1393_REV	Prostaglandin biosynthesis	14.8589
arm_HMR_2438	(arm)	m01217c + m02039c + m02555c -> pmet_HMR_2438	Linoleate metabolism	14.8589
arm_HMR_2438_REV	(reversible) (arm)	m01243c + m02040c + m02554c -> pmet_HMR_2438_REV	Linoleate metabolism	14.8589
GLCRt1	Transport by Glut-5 Transporter into Extracellular Space	m01681s -> m01681c	Transport reactions	14.3699
GLCRt1_REV	Transport by Glut-5 Transporter into Extracellular Space (reversible)	m01681c -> m01681s	Transport reactions	14.3699
HMR_4321		m01840c -> m01840s	Transport reactions	14.3699
HMR_4321_REV	(reversible)	m01840s -> m01840c	Transport reactions	14.3699
HMR_5029		m01965c -> m01965s	Transport reactions	14.3699
HMR_5029_REV	(reversible)	m01965s -> m01965c	Transport reactions	14.3699
HMR_5336No1	(No1)	pmet_HMR_5336 + 1.6614e-07 prot_Q8IXJ6 -> m01974c + m01986c + m02867c	Histidine metabolism	14.3362
HMR_5336_REVNo1	(reversible) (No1)	1.6614e-07 prot_Q8IXJ6 + pmet_HMR_5336_REV -> 2 m02040c + m02866c	Histidine metabolism	14.3362
HMR_5339No1	(No1)	1.6614e-07 prot_Q8IXJ6 + pmet_HMR_5339 -> m01252c + m02867c	Histidine metabolism	14.3362
HMR_5339_REVNo1	(reversible) (No1)	1.6614e-07 prot_Q8IXJ6 + pmet_HMR_5339_REV -> m02040c + m02548c	Histidine metabolism	14.3362
arm_HMR_5336	(arm)	2 m02040c + m02866c -> pmet_HMR_5336	Histidine metabolism	14.3362
arm_HMR_5336_REV	(reversible) (arm)	m01974c + m01986c + m02867c -> pmet_HMR_5336_REV	Histidine metabolism	14.3362
arm_HMR_5339	(arm)	m02040c + m02548c -> pmet_HMR_5339	Histidine metabolism	14.3362
arm_HMR_5339_REV	(reversible) (arm)	m01252c + m02867c -> pmet_HMR_5339_REV	Histidine metabolism	14.3362
HMR_0030No27	(No27)	6.6138e-11 prot_O95477 + pmet_HMR_0030 -> m01268n	Transport reactions	14.1631
HMR_5527		m02770c + m03089s -> m02770s + m03089c	Transport reactions	14.1631
HMR_5527_REV	(reversible)	m02770s + m03089c -> m02770c + m03089s	Transport reactions	14.1631
HMR_5528		m01369c + m03089s -> m01369s + m03089c	Transport reactions	14.1631
HMR_5528_REV	(reversible)	m01369s + m03089c -> m01369c + m03089s	Transport reactions	14.1631
HMR_5529		m03089c + m03135s -> m03089s + m03135c	Transport reactions	14.1631
HMR_5529_REV	(reversible)	m03089s + m03135c -> m03089c + m03135s	Transport reactions	14.1631
HMR_5530		m02993c + m03089s -> m02993s + m03089c	Transport reactions	14.1631
HMR_5530_REV	(reversible)	m02993s + m03089c -> m02993c + m03089s	Transport reactions	14.1631
HMR_5531		m02136c + m03089s -> m02136s + m03089c	Transport reactions	14.1631
HMR_5531_REV	(reversible)	m02136s + m03089c -> m02136c + m03089s	Transport reactions	14.1631
HMR_5532		m02184c + m03089s -> m02184s + m03089c	Transport reactions	14.1631
HMR_5532_REV	(reversible)	m02184s + m03089c -> m02184c + m03089s	Transport reactions	14.1631
HMR_5533		m02724c + m03101s -> m02724s + m03101c	Transport reactions	14.1631
HMR_5533_REV	(reversible)	m02724s + m03101c -> m02724c + m03101s	Transport reactions	14.1631
HMR_5534		m01628c + m02724s -> m01628s + m02724c	Transport reactions	14.1631
HMR_5534_REV	(reversible)	m01628s + m02724c -> m01628c + m02724s	Transport reactions	14.1631
HMR_5535		m02360c + m02724s -> m02360s + m02724c	Transport reactions	14.1631
HMR_5535_REV	(reversible)	m02360s + m02724c -> m02360c + m02724s	Transport reactions	14.1631
HMR_5536		m02724c + m02770s -> m02724s + m02770c	Transport reactions	14.1631
HMR_5536_REV	(reversible)	m02724s + m02770c -> m02724c + m02770s	Transport reactions	14.1631
HMR_5537		m01369c + m02724s -> m01369s + m02724c	Transport reactions	14.1631
HMR_5537_REV	(reversible)	m01369s + m02724c -> m01369c + m02724s	Transport reactions	14.1631
HMR_5538		m02724c + m03135s -> m02724s + m03135c	Transport reactions	14.1631
HMR_5538_REV	(reversible)	m02724s + m03135c -> m02724c + m03135s	Transport reactions	14.1631
HMR_5539		m02724c + m02993s -> m02724s + m02993c	Transport reactions	14.1631
HMR_5539_REV	(reversible)	m02724s + m02993c -> m02724c + m02993s	Transport reactions	14.1631
HMR_5540		m02136c + m02724s -> m02136s + m02724c	Transport reactions	14.1631
HMR_5540_REV	(reversible)	m02136s + m02724c -> m02136c + m02724s	Transport reactions	14.1631
HMR_5541		m02184c + m02724s -> m02184s + m02724c	Transport reactions	14.1631
HMR_5541_REV	(reversible)	m02184s + m02724c -> m02184c + m02724s	Transport reactions	14.1631
HMR_4549No4	(No4)	0.00053419 prot_Q9H2A9 + pmet_HMR_4549 -> m01161c + m02949c	Serotonin and melatonin biosynthesis	13.7997
HMR_4549_REVNo4	(reversible) (No4)	0.00053419 prot_Q9H2A9 + pmet_HMR_4549_REV -> m01162c + m02039c	Serotonin and melatonin biosynthesis	13.7997
HMR_0988No7	(No7)	4.1459e-07 prot_P22352 + pmet_HMR_0988 -> m00380c + 2 m02026c	Arachidonic acid metabolism	13.7019
HMR_0988_REVNo7	(reversible) (No7)	1.3607e-06 prot_P22352 + pmet_HMR_0988_REV -> m00377c + m02027c + m02040c	Arachidonic acid metabolism	13.7019
HMR_1043No7	(No7)	4.1459e-07 prot_P22352 + pmet_HMR_1043 -> m02096c	Arachidonic acid metabolism	13.7019
HMR_1043_REVNo7	(reversible) (No7)	4.1459e-07 prot_P22352 + pmet_HMR_1043_REV -> m00309c	Arachidonic acid metabolism	13.7019
HMR_1045No7	(No7)	4.1459e-07 prot_P22352 + pmet_HMR_1045 -> m02096s	Arachidonic acid metabolism	13.7019
HMR_1045_REVNo7	(reversible) (No7)	4.1459e-07 prot_P22352 + pmet_HMR_1045_REV -> m00309s	Arachidonic acid metabolism	13.7019
HMR_1048No7	(No7)	4.1459e-07 prot_P22352 + pmet_HMR_1048 -> m02096p	Arachidonic acid metabolism	13.7019
HMR_1048_REVNo7	(reversible) (No7)	4.1459e-07 prot_P22352 + pmet_HMR_1048_REV -> m00309p	Arachidonic acid metabolism	13.7019
HMR_1049No7	(No7)	4.1459e-07 prot_P22352 + pmet_HMR_1049 -> m02096r	Arachidonic acid metabolism	13.7019
HMR_1049_REVNo7	(reversible) (No7)	4.1459e-07 prot_P22352 + pmet_HMR_1049_REV -> m00309r	Arachidonic acid metabolism	13.7019
arm_HMR_0988	(arm)	m00377c + m02027c + m02040c -> pmet_HMR_0988	Arachidonic acid metabolism	13.7019
arm_HMR_0988_REV	(reversible) (arm)	m00380c + 2 m02026c -> pmet_HMR_0988_REV	Arachidonic acid metabolism	13.7019
arm_HMR_1043	(arm)	m00309c -> pmet_HMR_1043	Arachidonic acid metabolism	13.7019
arm_HMR_1043_REV	(reversible) (arm)	m02096c -> pmet_HMR_1043_REV	Arachidonic acid metabolism	13.7019
arm_HMR_1045	(arm)	m00309s -> pmet_HMR_1045	Arachidonic acid metabolism	13.7019
arm_HMR_1045_REV	(reversible) (arm)	m02096s -> pmet_HMR_1045_REV	Arachidonic acid metabolism	13.7019
arm_HMR_1048	(arm)	m00309p -> pmet_HMR_1048	Arachidonic acid metabolism	13.7019
arm_HMR_1048_REV	(reversible) (arm)	m02096p -> pmet_HMR_1048_REV	Arachidonic acid metabolism	13.7019
arm_HMR_1049	(arm)	m00309r -> pmet_HMR_1049	Arachidonic acid metabolism	13.7019
arm_HMR_1049_REV	(reversible) (arm)	m02096r -> pmet_HMR_1049_REV	Arachidonic acid metabolism	13.7019
arm_r0494	DTDP Diphosphohydrolase (arm)	m02040s + m01747s -> pmet_r0494	Pyrimidine metabolism	13.6086
arm_r0494_REV	DTDP Diphosphohydrolase (reversible) (arm)	m02039s + m02751s + m01752s -> pmet_r0494_REV	Pyrimidine metabolism	13.6086
arm_r0497	DTTP Nucleotidohydrolase (arm)	m02040s + m01753s -> pmet_r0497	Pyrimidine metabolism	13.6086
arm_r0497_REV	DTTP Nucleotidohydrolase (reversible) (arm)	m02039s + m02751s + m01747s -> pmet_r0497_REV	Pyrimidine metabolism	13.6086
r0494No3	DTDP Diphosphohydrolase (No3)	3.23e-07 prot_Q5MY95 + pmet_r0494 -> m02039s + m02751s + m01752s	Pyrimidine metabolism	13.6086
r0494_REVNo3	DTDP Diphosphohydrolase (reversible) (No3)	3.23e-07 prot_Q5MY95 + pmet_r0494_REV -> m02040s + m01747s	Pyrimidine metabolism	13.6086
r0497No3	DTTP Nucleotidohydrolase (No3)	3.23e-07 prot_Q5MY95 + pmet_r0497 -> m02039s + m02751s + m01747s	Pyrimidine metabolism	13.6086
r0497_REVNo3	DTTP Nucleotidohydrolase (reversible) (No3)	3.23e-07 prot_Q5MY95 + pmet_r0497_REV -> m02040s + m01753s	Pyrimidine metabolism	13.6086
HMR_6058		m01442s -> m01442c	Transport reactions	13.315
HMR_6534		m01442s + 2 m02046c -> m01442c + 2 m02046s	Transport reactions	13.315
HMR_7631		m01413c + m02200c + 4 m02519s -> m01413s + m02200s + 4 m02519c	Transport reactions	13.0619
HMR_6527		m01442s + m02579s -> m01442c + m02579c	Transport reactions	13.0619
HMR_1088No34	(No34)	pmet_HMR_1088 + 1.4172e-07 prot_Q8WVZ1 -> m01261c + m02369c	Leukotriene metabolism	13.0293
HMR_1088_REVNo34	(reversible) (No34)	7.215e-06 prot_Q8WVZ1 + pmet_HMR_1088_REV -> m01597c + m02039c + m02538c	Leukotriene metabolism	13.0293
HMR_1091No34	(No34)	1.4172e-07 prot_Q8WVZ1 + pmet_HMR_1091 -> m01261n + m02369n	Leukotriene metabolism	13.0293
HMR_1091_REVNo34	(reversible) (No34)	7.215e-06 prot_Q8WVZ1 + pmet_HMR_1091_REV -> m01597n + m02039n + m02538n	Leukotriene metabolism	13.0293
HMR_5336No7	(No7)	9.1676e-05 prot_Q96HD9 + pmet_HMR_5336 -> m01974c + m01986c + m02867c	Histidine metabolism	13.0293
HMR_5336_REVNo7	(reversible) (No7)	9.1676e-05 prot_Q96HD9 + pmet_HMR_5336_REV -> 2 m02040c + m02866c	Histidine metabolism	13.0293
HMR_5339No7	(No7)	9.1676e-05 prot_Q96HD9 + pmet_HMR_5339 -> m01252c + m02867c	Histidine metabolism	13.0293
HMR_5339_REVNo7	(reversible) (No7)	9.1676e-05 prot_Q96HD9 + pmet_HMR_5339_REV -> m02040c + m02548c	Histidine metabolism	13.0293
HMR_6969No2	(No2)	pmet_HMR_6969 + 9.1676e-05 prot_Q96HD9 -> m01252c + m01369c	Alanine, aspartate and glutamate metabolism	13.0293
HMR_6969_REVNo2	(reversible) (No2)	9.1676e-05 prot_Q96HD9 + pmet_HMR_6969_REV -> m02040c + m02531c	Alanine, aspartate and glutamate metabolism	13.0293
arm_HMR_6969	(arm)	m02040c + m02531c -> pmet_HMR_6969	Alanine, aspartate and glutamate metabolism	13.0293
arm_HMR_6969_REV	(reversible) (arm)	m01252c + m01369c -> pmet_HMR_6969_REV	Alanine, aspartate and glutamate metabolism	13.0293
HMR_0991No16	(No16)	2.1701e-06 prot_P24462 + pmet_HMR_0991 -> m00390c	Arachidonic acid metabolism	12.9883
HMR_0991_REVNo16	(reversible) (No16)	2.1701e-06 prot_P24462 + pmet_HMR_0991_REV -> m00380c	Arachidonic acid metabolism	12.9883
HMR_0992No16	(No16)	2.1701e-06 prot_P24462 + pmet_HMR_0992 -> m00390c + m02040c	Arachidonic acid metabolism	12.9883
HMR_0992_REVNo16	(reversible) (No16)	2.1701e-06 prot_P24462 + pmet_HMR_0992_REV -> m00276c	Arachidonic acid metabolism	12.9883
HMR_0993No16	(No16)	2.1701e-06 prot_P24462 + pmet_HMR_0993 -> m00380c	Arachidonic acid metabolism	12.9883
HMR_0993_REVNo16	(reversible) (No16)	2.1701e-06 prot_P24462 + pmet_HMR_0993_REV -> m00296c	Arachidonic acid metabolism	12.9883
HMR_0994No16	(No16)	2.1701e-06 prot_P24462 + pmet_HMR_0994 -> m00296c + m02040c	Arachidonic acid metabolism	12.9883
HMR_0994_REVNo16	(reversible) (No16)	2.1701e-06 prot_P24462 + pmet_HMR_0994_REV -> m00280c	Arachidonic acid metabolism	12.9883
HMR_1149No16	(No16)	0.00010808 prot_P24462 + pmet_HMR_1149 -> m01152c + m02554c	Leukotriene metabolism	12.9883
HMR_1149_REVNo16	(reversible) (No16)	2.1701e-06 prot_P24462 + pmet_HMR_1149_REV -> m01124c + m02039c + m02555c	Leukotriene metabolism	12.9883
HMR_1150No16	(No16)	0.00010808 prot_P24462 + pmet_HMR_1150 -> m01152m + m02554m	Leukotriene metabolism	12.9883
HMR_1150_REVNo16	(reversible) (No16)	2.1701e-06 prot_P24462 + pmet_HMR_1150_REV -> m01124m + m02039m + m02555m	Leukotriene metabolism	12.9883
HMR_1151No16	(No16)	0.00010808 prot_P24462 + pmet_HMR_1151 -> m01152r + m02554r	Leukotriene metabolism	12.9883
HMR_1151_REVNo16	(reversible) (No16)	2.1701e-06 prot_P24462 + pmet_HMR_1151_REV -> m01124r + m02039r + m02555r	Leukotriene metabolism	12.9883
HMR_1152No16	(No16)	0.00010808 prot_P24462 + pmet_HMR_1152 -> m01152p + m02554p	Leukotriene metabolism	12.9883
HMR_1152_REVNo16	(reversible) (No16)	2.1701e-06 prot_P24462 + pmet_HMR_1152_REV -> m01124p + m02039p + m02555p	Leukotriene metabolism	12.9883
HMR_1153No16	(No16)	0.00010808 prot_P24462 + pmet_HMR_1153 -> m01153c + m02554c	Leukotriene metabolism	12.9883
HMR_1153_REVNo16	(reversible) (No16)	2.1701e-06 prot_P24462 + pmet_HMR_1153_REV -> m01152c + m02039c + m02555c	Leukotriene metabolism	12.9883
HMR_1154No16	(No16)	0.00010808 prot_P24462 + pmet_HMR_1154 -> m01153m + m02554m	Leukotriene metabolism	12.9883
HMR_1154_REVNo16	(reversible) (No16)	2.1701e-06 prot_P24462 + pmet_HMR_1154_REV -> m01152m + m02039m + m02555m	Leukotriene metabolism	12.9883
HMR_1155No16	(No16)	0.00010808 prot_P24462 + pmet_HMR_1155 -> m01153r + m02554r	Leukotriene metabolism	12.9883
HMR_1155_REVNo16	(reversible) (No16)	2.1701e-06 prot_P24462 + pmet_HMR_1155_REV -> m01152r + m02039r + m02555r	Leukotriene metabolism	12.9883
HMR_1156No16	(No16)	0.00010808 prot_P24462 + pmet_HMR_1156 -> m01153p + m02554p	Leukotriene metabolism	12.9883
HMR_1156_REVNo16	(reversible) (No16)	2.1701e-06 prot_P24462 + pmet_HMR_1156_REV -> m01152p + m02039p + m02555p	Leukotriene metabolism	12.9883
HMR_1193No16	(No16)	0.00010808 prot_P24462 + pmet_HMR_1193 -> m01151c + m02554c	Leukotriene metabolism	12.9883
HMR_1193_REVNo16	(reversible) (No16)	2.1701e-06 prot_P24462 + pmet_HMR_1193_REV -> m01118c + m02039c + m02555c	Leukotriene metabolism	12.9883
HMR_1194No16	(No16)	0.00010808 prot_P24462 + pmet_HMR_1194 -> m01151m + m02554m	Leukotriene metabolism	12.9883
HMR_1194_REVNo16	(reversible) (No16)	2.1701e-06 prot_P24462 + pmet_HMR_1194_REV -> m01118m + m02039m + m02555m	Leukotriene metabolism	12.9883
HMR_1195No16	(No16)	0.00010808 prot_P24462 + pmet_HMR_1195 -> m01151r + m02554r	Leukotriene metabolism	12.9883
HMR_1195_REVNo16	(reversible) (No16)	2.1701e-06 prot_P24462 + pmet_HMR_1195_REV -> m01118r + m02039r + m02555r	Leukotriene metabolism	12.9883
HMR_1196No16	(No16)	0.00010808 prot_P24462 + pmet_HMR_1196 -> m01151p + m02554p	Leukotriene metabolism	12.9883
HMR_1196_REVNo16	(reversible) (No16)	2.1701e-06 prot_P24462 + pmet_HMR_1196_REV -> m01118p + m02039p + m02555p	Leukotriene metabolism	12.9883
HMR_7019No9	(No9)	0.00010808 prot_P24462 + pmet_HMR_7019 -> m01301c + m02040c + m02554c	Xenobiotics metabolism	12.9883
HMR_7019_REVNo9	(reversible) (No9)	2.1701e-06 prot_P24462 + pmet_HMR_7019_REV -> m01300c + m02039c + m02555c + m02630c	Xenobiotics metabolism	12.9883
HMR_7048No9	(No9)	0.00010808 prot_P24462 + pmet_HMR_7048 -> m01405c + m02040c + m02554c	Xenobiotics metabolism	12.9883
HMR_7048_REVNo9	(reversible) (No9)	2.1701e-06 prot_P24462 + pmet_HMR_7048_REV -> m01403c + m02039c + m02555c + m02630c	Xenobiotics metabolism	12.9883
HMR_0030No24	(No24)	6.6138e-11 prot_P02652 + pmet_HMR_0030 -> m01268n	Transport reactions	12.869
HMR_0156No3	(No3)	pmet_HMR_0156 + 4.6296e-05 prot_Q08AH1 -> m01371c + m01410c + m01597c	Fatty acid activation (cytosolic)	12.869
HMR_0156_REVNo3	(reversible) (No3)	4.6296e-05 prot_Q08AH1 + pmet_HMR_0156_REV -> m01334c + m01412c + m02759c	Fatty acid activation (cytosolic)	12.869
HMR_0165No3	(No3)	4.6296e-05 prot_Q08AH1 + pmet_HMR_0165 -> m01371c + m01597c + m03134c	Fatty acid activation (cytosolic)	12.869
HMR_0165_REVNo3	(reversible) (No3)	4.6296e-05 prot_Q08AH1 + pmet_HMR_0165_REV -> m01334c + m02694c + m02759c	Fatty acid activation (cytosolic)	12.869
HMR_0168No3	(No3)	4.6296e-05 prot_Q08AH1 + pmet_HMR_0168 -> m01371c + m01597c + m02120c	Fatty acid activation (cytosolic)	12.869
HMR_0168_REVNo3	(reversible) (No3)	4.6296e-05 prot_Q08AH1 + pmet_HMR_0168_REV -> m01334c + m02122c + m02759c	Fatty acid activation (cytosolic)	12.869
[truncated: 45,370 more rows]

## Sheet: pathways
Pathway	FC mean	FC sem	FC std	log2FC mean
[truncated: 157 more rows]

## Sheet: pathways_sorted
Pathway	FC mean	FC sem	FC std	log2FC mean
[truncated: 157 more rows]

[truncated: 2 more sheets: enrichment_table_dmd, metabolites]
